# Supplementary material for: TDP-43 loss and ALS-risk SNPs drive mis-splicing and depletion of UNC13A
Source: PubMed Central journal article supplement (PMC8891020; doi:10.1038/s41586-022-04436-3), 2022-02-23

## Supplementary information

---

# TDP-43 loss and ALS-risk SNPs drive mis-splicing and depletion of UNC13A

---

In the format provided by the  
authors and unedited

## Supplementary information

---

# TDP-43 loss and ALS-risk SNPs drive mis-splicing and depletion of UNC13A

---

In the format provided by the  
authors and unedited

**Supplemental Figure 1.** Uncropped immunoblots from Extended Data Fig. 3F. Red dashed boxes indicate regions shown in the figure. UNC13B, Tubulin, and TDP-43 are from the same membrane. UNC13A is blotted on a separate membrane.

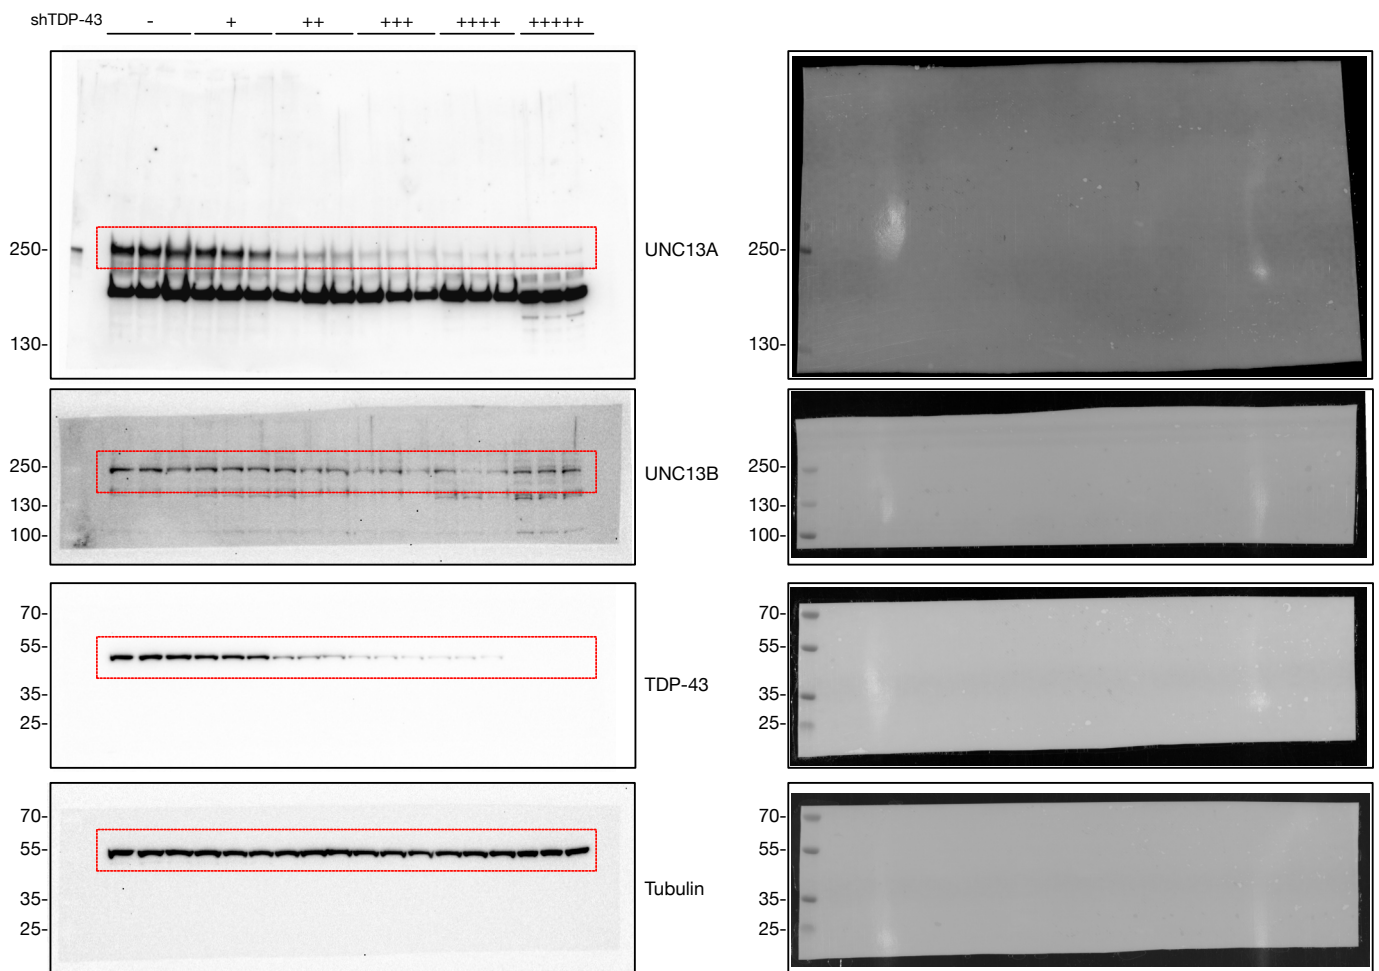

Supplement: 41586_2022_4436_MOESM1_ESM.pdf [file 41586_2022_4436_MOESM1_ESM.pdf]
