# Supplementary material for: TDP-43 loss and ALS-risk SNPs drive mis-splicing and depletion of UNC13A
Source: Nature. 2022 Feb 23;603(7899):131–7. doi: 10.1038/s41586-022-04436-3 (PMC8891020; doi:10.1038/s41586-022-04436-3)
Supplement: Supplementary file 11 — List of differentially spliced junctions between control and TDP-43-knockdown i3Neurons (Fig. 1a). [file 41586_2022_4436_MOESM11_ESM.csv]

gene_name	gene_id	lsv_id	deltaPSI	p_d_psi_0_10_per_lsv_junction	FDR	control_e_psi	tdp_kd_e_psi	lsv_type	a5ss	a3ss	es	num_junctions	num_exons	de_novo_junctions	chr	strand	lsv_junc	exon_start	exon_end	junc_start	junc_end	ir_start	ir_end	junc_dist	paste_into_igv_junction	paste_into_igv_exon	exon_length	exon_mod_3	exon_type	junc_cat	cryptic_junction
CACNA2D2	ENSG00000007402.11	ENSG00000007402.11:s:50374737-50374813	0.118402055493963	0.594777183830947	3.5523956471113e-06	0.745	0.895	s|1e1.1o1|1e2.1o1	FALSE	FALSE	TRUE	2	3	1	chr3	-	ENSG00000007402.11:s:50374737-50374813_50373085-50374737	50370320	50370380	50373085	50374737			1652	chr3:50373085-50374737	chr3:50370320-50370380	60	0	source	annotated	FALSE
CACNA2D2	ENSG00000007402.11	ENSG00000007402.11:s:50374737-50374813	-0.118402104503771	0.594777659618967	3.55258062012531e-06	0.255	0.105	s|1e1.1o1|1e2.1o1	FALSE	FALSE	TRUE	2	3	1	chr3	-	ENSG00000007402.11:s:50374737-50374813_50370380-50374737	50373065	50373085	50370380	50374737			4357	chr3:50370380-50374737	chr3:50373065-50373085	20	2	source	annotated	FALSE
SLC45A4	ENSG00000022567.9	ENSG00000022567.9:t:141221577-141221765	0.149956116168065	0.747770251581941	2.14184685906307e-06	0.045	0.225	t|1e1.1o1|1e2.2o2	FALSE	FALSE	TRUE	2	3	1	chr8	-	ENSG00000022567.9:t:141221577-141221765_141221765-141308096	141221577	141221765	141221765	141308096			86331	chr8:141221765-141308096	chr8:141221577-141221765	188	2	target	annotated	FALSE
SLC45A4	ENSG00000022567.9	ENSG00000022567.9:t:141221577-141221765	-0.14995615224645	0.747770636526603	2.14195595282796e-06	0.955	0.775	t|1e1.1o1|1e2.2o2	FALSE	FALSE	TRUE	2	3	1	chr8	-	ENSG00000022567.9:t:141221577-141221765_141221765-141253989	141253989	141254629	141221765	141253989			32224	chr8:141221765-141253989	chr8:141253989-141254629	640	1	target	annotated	FALSE
BRD9	ENSG00000028310.18	ENSG00000028310.18:t:850291-850602	-0.247345791847947	0.996486662953293	1.44190311912595e-08	0.943	0.685	t|1e1.1o1|1e2.1o2|1e3.1o1|1e4.1o1	FALSE	FALSE	TRUE	4	5	1	chr5	-	ENSG00000028310.18:t:850291-850602_850602-878355	850291	850602	850602	878355			27753	chr5:850602-878355	chr5:850291-850602	311	2	target	annotated	FALSE
BRD9	ENSG00000028310.18	ENSG00000028310.18:t:850291-850602	0.0541872143494485	0.0916070468559428	3.35211678059988e-05	0.015	0.091	t|1e1.1o1|1e2.1o2|1e3.1o1|1e4.1o1	FALSE	FALSE	TRUE	4	5	0	chr5	-	ENSG00000028310.18:t:850291-850602_850602-860544	859550		850602	860544			9942	chr5:850602-860544	chr5:859550-nan			target	novel_donor	FALSE
BRD9	ENSG00000028310.18	ENSG00000028310.18:t:850291-850602	0.0695243086999357	0.209114522436905	1.33732459027641e-05	0.015	0.108	t|1e1.1o1|1e2.1o2|1e3.1o1|1e4.1o1	FALSE	FALSE	TRUE	4	5	0	chr5	-	ENSG00000028310.18:t:850291-850602_850602-859601	859601		850602	859601			8999	chr5:850602-859601	chr5:859601-nan			target	novel_donor	FALSE
BRD9	ENSG00000028310.18	ENSG00000028310.18:t:850291-850602	0.0718579897018168	0.259218810304061	9.40047025872681e-06	0.028	0.118	t|1e1.1o1|1e2.1o2|1e3.1o1|1e4.1o1	FALSE	FALSE	TRUE	4	5	0	chr5	-	ENSG00000028310.18:t:850291-850602_850602-859550	860195	860683	850602	859550			8948	chr5:850602-859550	chr5:860195-860683	488	2	target	novel_donor	FALSE
CYFIP2	ENSG00000055163.20	ENSG00000055163.20:t:157330742-157330850	-0.119078096402789	0.685699726498701	4.03455156627874e-06	1	0.854	t|1e1.2o2|1e2.1o1|i	FALSE	FALSE	TRUE	3	3	1	chr5	+	ENSG00000055163.20:t:157330742-157330850_157328049-157330742	157327925	157328049	157328049	157330742	157330227	157330741	2693	chr5:157328049-157330742	chr5:157327925-157328049	124	1	target	annotated	FALSE
CYFIP2	ENSG00000055163.20	ENSG00000055163.20:t:157330742-157330850	0.00154472499630217	2.0094359510442e-10	0.474971631045128	0	0.039	t|1e1.2o2|1e2.1o1|i	FALSE	FALSE	TRUE	3	3	0	chr5	+	ENSG00000055163.20:t:157330742-157330850_157330227-157330742	157330162	157330227	157330227	157330742			515	chr5:157330227-157330742	chr5:157330162-157330227	65	2	target	novel_donor	FALSE
CYFIP2	ENSG00000055163.20	ENSG00000055163.20:t:157330742-157330850	0.0784308932100742	0.288514693549321	9.66303576672757e-05	0	0.106	t|1e1.2o2|1e2.1o1|i	FALSE	FALSE	TRUE	3	3	0	chr5	+	ENSG00000055163.20:t:157330742-157330850_157330227-157330741	157330742	157330850	157330227	157330741			514	chr5:157330227-157330741	chr5:157330742-157330850	108	0	target	none	FALSE
LRP6	ENSG00000070018.9	ENSG00000070018.9:s:12120370-12120403	0.230934955642058	0.948349559012669	4.39662168130058e-06	0.067	0.323	s|1e1.1o1|i	FALSE	FALSE	FALSE	2	2	1	chr12	-	ENSG00000070018.9:s:12120370-12120403_12119330-12120370	12116025	12119330	12119330	12120370	12119331	12120369	1040	chr12:12119330-12120370	chr12:12116025-12119330	3305	2	source	annotated	FALSE
LRP6	ENSG00000070018.9	ENSG00000070018.9:s:12120370-12120403	-0.230934928297287	0.948349597740597	4.39695445897392e-06	0.933	0.677	s|1e1.1o1|i	FALSE	FALSE	FALSE	2	2	1	chr12	-	ENSG00000070018.9:s:12120370-12120403_12119331-12120369	12120370	12120403	12119331	12120369			1038	chr12:12119331-12120369	chr12:12120370-12120403	33	0	source	none	FALSE
CHFR	ENSG00000072609.17	ENSG00000072609.17:t:132861467-132861904	0.101773156326829	0.507312985406487	3.1263400117758e-06	0.059	0.174	t|1e1.1o1|1e2.2o2|1e3.2o2|1e4.1o1	FALSE	FALSE	TRUE	4	5	1	chr12	-	ENSG00000072609.17:t:132861467-132861904_132861634-132872285	132861467	132861904	132861634	132872285			10651	chr12:132861634-132872285	chr12:132861467-132861904	437	2	target	annotated	FALSE
CHFR	ENSG00000072609.17	ENSG00000072609.17:t:132861467-132861904	0.00767067442201684	0.00932814760192437	0.000146630545725529	0.151	0.164	t|1e1.1o1|1e2.2o2|1e3.2o2|1e4.1o1	FALSE	FALSE	TRUE	4	5	1	chr12	-	ENSG00000072609.17:t:132861467-132861904_132861634-132870724	132862333	132862425	132861634	132870724			9090	chr12:132861634-132870724	chr12:132862333-132862425	92	2	target	annotated	FALSE
CHFR	ENSG00000072609.17	ENSG00000072609.17:t:132861467-132861904	-0.0957039407908118	0.464000770708104	4.7855695300969e-06	0.745	0.631	t|1e1.1o1|1e2.2o2|1e3.2o2|1e4.1o1	FALSE	FALSE	TRUE	4	5	1	chr12	-	ENSG00000072609.17:t:132861467-132861904_132861634-132869619	132869619	132869675	132861634	132869619			7985	chr12:132861634-132869619	chr12:132869619-132869675	56	2	target	annotated	FALSE
CHFR	ENSG00000072609.17	ENSG00000072609.17:t:132861467-132861904	-0.00528385367445007	8.2184581237059e-06	0.0602648243602112	0.043	0.03	t|1e1.1o1|1e2.2o2|1e3.2o2|1e4.1o1	FALSE	FALSE	TRUE	4	5	1	chr12	-	ENSG00000072609.17:t:132861467-132861904_132861634-132862333	132870724	132870783	132861634	132862333			699	chr12:132861634-132862333	chr12:132870724-132870783	59	2	target	annotated	FALSE
CTTNBP2	ENSG00000077063.11	ENSG00000077063.11:t:117861209-117861316	-0.21885055886723	0.98756586930346	5.03254379280449e-08	0.977	0.744	t|1e1.1o1|1e2.1o1	FALSE	FALSE	TRUE	2	3	1	chr7	-	ENSG00000077063.11:t:117861209-117861316_117861316-117873335	117861209	117861316	117861316	117873335			12019	chr7:117861316-117873335	chr7:117861209-117861316	107	2	target	annotated	FALSE
CTTNBP2	ENSG00000077063.11	ENSG00000077063.11:t:117861209-117861316	0.218850569776055	0.987565884400169	5.03229197110719e-08	0.023	0.256	t|1e1.1o1|1e2.1o1	FALSE	FALSE	TRUE	2	3	0	chr7	-	ENSG00000077063.11:t:117861209-117861316_117861316-117862098	117862098		117861316	117862098			782	chr7:117861316-117862098	chr7:117862098-nan			target	novel_donor	TRUE
RUNX1T1	ENSG00000079102.16	ENSG00000079102.16:t:92017400-92017637	-0.0457502263419436	0.0907445476412388	2.98465097955392e-05	0.091	0.008	t|1e1.1o1|1e2.1o1|1e3.1o1	FALSE	FALSE	TRUE	3	4	1	chr8	-	ENSG00000079102.16:t:92017400-92017637_92017431-92095028	92017400	92017637	92017431	92095028			77597	chr8:92017431-92095028	chr8:92017400-92017637	237	0	target	annotated	FALSE
RUNX1T1	ENSG00000079102.16	ENSG00000079102.16:t:92017400-92017637	0.200251598264816	0.911632747591332	8.79354737980923e-07	0.732	0.959	t|1e1.1o1|1e2.1o1|1e3.1o1	FALSE	FALSE	TRUE	3	4	1	chr8	-	ENSG00000079102.16:t:92017400-92017637_92017431-92075965	92062546	92062622	92017431	92075965			58534	chr8:92017431-92075965	chr8:92062546-92062622	76	1	target	annotated	FALSE
RUNX1T1	ENSG00000079102.16	ENSG00000079102.16:t:92017400-92017637	-0.111993174651429	0.576188898072704	3.24617977787156e-06	0.177	0.033	t|1e1.1o1|1e2.1o1|1e3.1o1	FALSE	FALSE	TRUE	3	4	1	chr8	-	ENSG00000079102.16:t:92017400-92017637_92017431-92062546	92075965	92076137	92017431	92062546			45115	chr8:92017431-92062546	chr8:92075965-92076137	172	1	target	annotated	FALSE
SEH1L	ENSG00000085415.16	ENSG00000085415.16:s:12984040-12984190	0.13210325896342	0.727178284696138	1.47788427675326e-06	0.751	0.893	s|1e1.1o1|1e2.1o1	FALSE	FALSE	TRUE	2	3	1	chr18	+	ENSG00000085415.16:s:12984040-12984190_12984190-12985240	12984040	12984190	12984190	12985240			1050	chr18:12984190-12985240	chr18:12984040-12984190	150	0	source	annotated	FALSE
SEH1L	ENSG00000085415.16	ENSG00000085415.16:s:12984040-12984190	-0.132103289046443	0.727178587771084	1.47796470739703e-06	0.249	0.107	s|1e1.1o1|1e2.1o1	FALSE	FALSE	TRUE	2	3	1	chr18	+	ENSG00000085415.16:s:12984040-12984190_12984190-12986862	12985240	12985718	12984190	12986862			2672	chr18:12984190-12986862	chr18:12985240-12985718	478	1	source	annotated	FALSE
SEH1L	ENSG00000085415.16	ENSG00000085415.16:t:12986862-12987536	-0.269017940199421	0.964111631440886	4.40463295581228e-06	0.573	0.274	t|1e1.1o1|i	FALSE	FALSE	FALSE	2	2	1	chr18	+	ENSG00000085415.16:t:12986862-12987536_12984190-12986862	12984040	12984190	12984190	12986862	12985719	12986861	2672	chr18:12984190-12986862	chr18:12984040-12984190	150	0	target	annotated	FALSE
SEH1L	ENSG00000085415.16	ENSG00000085415.16:t:12986862-12987536	0.269017930197019	0.964111553596923	4.40431305836338e-06	0.427	0.726	t|1e1.1o1|i	FALSE	FALSE	FALSE	2	2	1	chr18	+	ENSG00000085415.16:t:12986862-12987536_12985719-12986861	12986862	12987536	12985719	12986861			1142	chr18:12985719-12986861	chr18:12986862-12987536	674	2	target	none	FALSE
ZNF268	ENSG00000090612.21	ENSG00000090612.21:t:133202144-133214831	-0.0217228057441394	0.00246698372849391	0.000663779532326436	0.057	0.002	t|1e1.1o2|1e2.1o1|1e3.1o2	FALSE	FALSE	TRUE	3	4	1	chr12	+	ENSG00000090612.21:t:133202144-133214831_133188072-133202144	133187865	133188153	133188072	133202144			14072	chr12:133188072-133202144	chr12:133187865-133188153	288	0	target	annotated	FALSE
ZNF268	ENSG00000090612.21	ENSG00000090612.21:t:133202144-133214831	0.109241532147525	0.539698376244293	4.25884005316807e-06	0.351	0.497	t|1e1.1o2|1e2.1o1|1e3.1o2	FALSE	FALSE	TRUE	3	4	1	chr12	+	ENSG00000090612.21:t:133202144-133214831_133192003-133202144	133191721	133192003	133192003	133202144			10141	chr12:133192003-133202144	chr12:133191721-133192003	282	0	target	annotated	FALSE
ZNF268	ENSG00000090612.21	ENSG00000090612.21:t:133202144-133214831	-0.0528224391463829	0.21523122709687	1.15770568576146e-05	0.591	0.501	t|1e1.1o2|1e2.1o1|1e3.1o2	FALSE	FALSE	TRUE	3	4	1	chr12	+	ENSG00000090612.21:t:133202144-133214831_133193533-133202144	133193428	133193537	133193533	133202144			8611	chr12:133193533-133202144	chr12:133193428-133193537	109	1	target	annotated	FALSE
CRYBB2P1	ENSG00000100058.12	ENSG00000100058.12:s:25459416-25459681	-0.205025697267277	0.978153332842985	4.70347995551457e-07	0.797	0.582	s|1e1.2o2|1e2.1o1|1e3.1o1|1e4.1o1|i	FALSE	FALSE	TRUE	5	5	1	chr22	+	ENSG00000100058.12:s:25459416-25459681_25459515-25460867	25459416	25459681	25459515	25460867	25459682	25459975	1352	chr22:25459515-25460867	chr22:25459416-25459681	265	1	source	annotated	FALSE
CRYBB2P1	ENSG00000100058.12	ENSG00000100058.12:s:25459416-25459681	-0.00640837214413678	0.00148797438474438	0.00483921598229398	0.077	0.061	s|1e1.2o2|1e2.1o1|1e3.1o1|1e4.1o1|i	FALSE	FALSE	TRUE	5	5	0	chr22	+	ENSG00000100058.12:s:25459416-25459681_25459515-25466059	25459976	25461678	25459515	25466059			6544	chr22:25459515-25466059	chr22:25459976-25461678	1702	1	source	novel_acceptor	FALSE
CRYBB2P1	ENSG00000100058.12	ENSG00000100058.12:s:25459416-25459681	2.58809430008849e-05	6.20587148337413e-09	0.427184993070921	0.007	0.015	s|1e1.2o2|1e2.1o1|1e3.1o1|1e4.1o1|i	FALSE	FALSE	TRUE	5	5	1	chr22	+	ENSG00000100058.12:s:25459416-25459681_25459515-25509183	25466059		25459515	25509183			49668	chr22:25459515-25509183	chr22:25466059-nan			source	annotated	FALSE
CRYBB2P1	ENSG00000100058.12	ENSG00000100058.12:s:25459416-25459681	0.0844017043970452	0.381586200276049	5.14870297813261e-05	0.039	0.127	s|1e1.2o2|1e2.1o1|1e3.1o1|1e4.1o1|i	FALSE	FALSE	TRUE	5	5	0	chr22	+	ENSG00000100058.12:s:25459416-25459681_25459515-25520682	25509183	25509342	25459515	25520682			61167	chr22:25459515-25520682	chr22:25509183-25509342	159	0	source	novel_exon_skip	FALSE
CRYBB2P1	ENSG00000100058.12	ENSG00000100058.12:s:25459416-25459681	0.128536285911516	0.73750036759335	1.15019993660371e-05	0.08	0.216	s|1e1.2o2|1e2.1o1|1e3.1o1|1e4.1o1|i	FALSE	FALSE	TRUE	5	5	0	chr22	+	ENSG00000100058.12:s:25459416-25459681_25459682-25459975	25520682	25520854	25459682	25459975			293	chr22:25459682-25459975	chr22:25520682-25520854	172	1	source	none	FALSE
HMGXB4	ENSG00000100281.14	ENSG00000100281.14:t:35262763-35263226	0.174320191130252	0.876193166217438	9.38042918768202e-07	0.407	0.601	t|1e1.1o1|1e2.1o1	FALSE	FALSE	TRUE	2	3	1	chr22	+	ENSG00000100281.14:t:35262763-35263226_35257557-35263078	35257452	35257557	35257557	35263078			5521	chr22:35257557-35263078	chr22:35257452-35257557	105	0	target	annotated	FALSE
HMGXB4	ENSG00000100281.14	ENSG00000100281.14:t:35262763-35263226	-0.174320202014009	0.876193204406855	9.38088369539791e-07	0.593	0.399	t|1e1.1o1|1e2.1o1	FALSE	FALSE	TRUE	2	3	1	chr22	+	ENSG00000100281.14:t:35262763-35263226_35262421-35263078	35261854	35262421	35262421	35263078			657	chr22:35262421-35263078	chr22:35261854-35262421	567	0	target	annotated	FALSE
STAG2	ENSG00000101972.18	ENSG00000101972.18:s:124090575-124090764	0.134036957199796	0.706089120383744	2.14417127479427e-06	0.302	0.45	s|1e1.1o1|1e2.2o2	FALSE	FALSE	TRUE	2	3	1	chrX	+	ENSG00000101972.18:s:124090575-124090764_124090764-124090854	124090575	124090764	124090764	124090854			90	chrX:124090764-124090854	chrX:124090575-124090764	189	0	source	annotated	FALSE
STAG2	ENSG00000101972.18	ENSG00000101972.18:s:124090575-124090764	-0.134036988041214	0.706089447885235	2.14428568334757e-06	0.698	0.55	s|1e1.1o1|1e2.2o2	FALSE	FALSE	TRUE	2	3	1	chrX	+	ENSG00000101972.18:s:124090575-124090764_124090764-124094018	124090854	124090964	124090764	124094018			3254	chrX:124090764-124094018	chrX:124090854-124090964	110	2	source	annotated	FALSE
STAG2	ENSG00000101972.18	ENSG00000101972.18:t:124093913-124094144	-0.140108552046645	0.755640328371307	1.55802747766609e-05	0.692	0.534	t|1e1.1o1|1e2.1o1|i	FALSE	FALSE	TRUE	3	3	1	chrX	+	ENSG00000101972.18:t:124093913-124094144_124090764-124094018	124090575	124090764	124090764	124094018	124090965	124093912	3254	chrX:124090764-124094018	chrX:124090575-124090764	189	0	target	annotated	FALSE
STAG2	ENSG00000101972.18	ENSG00000101972.18:t:124093913-124094144	0.112459469676003	0.587156182253888	3.44086019843819e-05	0.29	0.424	t|1e1.1o1|1e2.1o1|i	FALSE	FALSE	TRUE	3	3	1	chrX	+	ENSG00000101972.18:t:124093913-124094144_124090964-124094018	124090854	124090964	124090964	124094018			3054	chrX:124090964-124094018	chrX:124090854-124090964	110	2	target	annotated	FALSE
STAG2	ENSG00000101972.18	ENSG00000101972.18:t:124093913-124094144	0.00537009968183998	0.000142790287844363	0.0352882135128341	0.015	0.039	t|1e1.1o1|1e2.1o1|i	FALSE	FALSE	TRUE	3	3	0	chrX	+	ENSG00000101972.18:t:124093913-124094144_124090965-124093912	124093913	124094144	124090965	124093912			2947	chrX:124090965-124093912	chrX:124093913-124094144	231	0	target	none	FALSE
VRK3	ENSG00000105053.11	ENSG00000105053.11:s:49987701-49988492	-0.0404180063300598	0.0838683775947435	0.000336616473952445	0.194	0.13	s|1e1.1o1|1e2.2o2|i	FALSE	FALSE	TRUE	3	3	1	chr19	-	ENSG00000105053.11:s:49987701-49988492_49986933-49988372	49980955	49981184	49986933	49988372	49986934	49987700	1439	chr19:49986933-49988372	chr19:49980955-49981184	229	1	source	annotated	FALSE
VRK3	ENSG00000105053.11	ENSG00000105053.11:s:49987701-49988492	-0.0462224174172154	0.111403205320369	0.000238883044344274	0.113	0.05	s|1e1.1o1|1e2.2o2|i	FALSE	FALSE	TRUE	3	3	1	chr19	-	ENSG00000105053.11:s:49987701-49988492_49981013-49988372	49986742	49986933	49981013	49988372			7359	chr19:49981013-49988372	chr19:49986742-49986933	191	2	source	annotated	FALSE
VRK3	ENSG00000105053.11	ENSG00000105053.11:s:49987701-49988492	0.10994005698811	0.584862494532888	2.92651508131358e-05	0.696	0.819	s|1e1.1o1|1e2.2o2|i	FALSE	FALSE	TRUE	3	3	0	chr19	-	ENSG00000105053.11:s:49987701-49988492_49986934-49987700	49987701	49988492	49986934	49987700			766	chr19:49986934-49987700	chr19:49987701-49988492	791	2	source	none	FALSE
VRK3	ENSG00000105053.11	ENSG00000105053.11:s:49999268-50001415	0.133193644737113	0.746615844248193	1.33725622549089e-06	0.712	0.857	s|1e1.2o2|1e2.1o1|1e3.1o1	FALSE	FALSE	TRUE	3	4	1	chr19	-	ENSG00000105053.11:s:49999268-50001415_49997570-50000790	49994814	49994919	49997570	50000790			3220	chr19:49997570-50000790	chr19:49994814-49994919	105	0	source	annotated	FALSE
VRK3	ENSG00000105053.11	ENSG00000105053.11:s:49999268-50001415	-0.0489008253056881	0.114228076911689	1.98506601984949e-05	0.15	0.085	s|1e1.2o2|1e2.1o1|1e3.1o1	FALSE	FALSE	TRUE	3	4	1	chr19	-	ENSG00000105053.11:s:49999268-50001415_49995275-50000790	49995191	49995275	49995275	50000790			5515	chr19:49995275-50000790	chr19:49995191-49995275	84	0	source	annotated	FALSE
VRK3	ENSG00000105053.11	ENSG00000105053.11:s:49999268-50001415	-0.0619723295090611	0.15125303751066	2.07129908159631e-05	0.135	0.058	s|1e1.2o2|1e2.1o1|1e3.1o1	FALSE	FALSE	TRUE	3	4	1	chr19	-	ENSG00000105053.11:s:49999268-50001415_49994919-50000790	49997544	49999198	49994919	50000790			5871	chr19:49994919-50000790	chr19:49997544-49999198	1654	1	source	annotated	FALSE
TAF6	ENSG00000106290.15	ENSG00000106290.15:s:100119204-100119317	-0.011685312676533	1.43115327003541e-05	0.30239749181666	0.05	0.016	s|1e1.1o1|1e2.2o3|i	FALSE	FALSE	TRUE	3	3	1	chr7	-	ENSG00000106290.15:s:100119204-100119317_100118649-100119204	100114054	100114558	100118649	100119204	100118977	100119203	555	chr7:100118649-100119204	chr7:100114054-100114558	504	0	source	annotated	FALSE
TAF6	ENSG00000106290.15	ENSG00000106290.15:s:100119204-100119317	-0.143020898203978	0.782815606877944	1.29070933233555e-05	0.399	0.245	s|1e1.1o1|1e2.2o3|i	FALSE	FALSE	TRUE	3	3	1	chr7	-	ENSG00000106290.15:s:100119204-100119317_100114268-100119204	100118396	100118649	100114268	100119204			4936	chr7:100114268-100119204	chr7:100118396-100118649	253	1	source	annotated	FALSE
TAF6	ENSG00000106290.15	ENSG00000106290.15:s:100119204-100119317	0.178871735743904	0.923565988242481	3.30238101099809e-06	0.55	0.739	s|1e1.1o1|1e2.2o3|i	FALSE	FALSE	TRUE	3	3	1	chr7	-	ENSG00000106290.15:s:100119204-100119317_100118977-100119203	100119204	100119317	100118977	100119203			226	chr7:100118977-100119203	chr7:100119204-100119317	113	2	source	none	FALSE
TAF6	ENSG00000106290.15	ENSG00000106290.15:t:100114054-100114558	-2.94085121138656e-05	7.30924590140644e-21	0.475023656170203	0.023	0.011	t|1e1.1o1|1e2.1o1|1e3.2o2|1e4.1o1|1e5.1o2|1e6.1o1|i	FALSE	FALSE	TRUE	7	7	1	chr7	-	ENSG00000106290.15:t:100114054-100114558_100114268-100119695	100114054	100114558	100114268	100119695	100114559	100116513	5427	chr7:100114268-100119695	chr7:100114054-100114558	504	0	target	annotated	FALSE
TAF6	ENSG00000106290.15	ENSG00000106290.15:t:100114054-100114558	-0.0010027245461124	1.5388132005564e-08	0.47168107909955	0.035	0.015	t|1e1.1o1|1e2.1o1|1e3.2o2|1e4.1o1|1e5.1o2|1e6.1o1|i	FALSE	FALSE	TRUE	7	7	1	chr7	-	ENSG00000106290.15:t:100114054-100114558_100114268-100119329	100116514	100116633	100114268	100119329			5061	chr7:100114268-100119329	chr7:100116514-100116633	119	2	target	annotated	FALSE
TAF6	ENSG00000106290.15	ENSG00000106290.15:t:100114054-100114558	-0.143612453336292	0.807523103622581	9.47446970267496e-06	0.387	0.235	t|1e1.1o1|1e2.1o1|1e3.2o2|1e4.1o1|1e5.1o2|1e6.1o1|i	FALSE	FALSE	TRUE	7	7	1	chr7	-	ENSG00000106290.15:t:100114054-100114558_100114268-100119204	100118396	100118649	100114268	100119204			4936	chr7:100114268-100119204	chr7:100118396-100118649	253	1	target	annotated	FALSE
TAF6	ENSG00000106290.15	ENSG00000106290.15:t:100114054-100114558	0.160375577030622	0.874704875011316	5.68762002433879e-06	0.456	0.626	t|1e1.1o1|1e2.1o1|1e3.2o2|1e4.1o1|1e5.1o2|1e6.1o1|i	FALSE	FALSE	TRUE	7	7	1	chr7	-	ENSG00000106290.15:t:100114054-100114558_100114268-100118880	100118880	100118976	100114268	100118880			4612	chr7:100114268-100118880	chr7:100118880-100118976	96	0	target	annotated	FALSE
TAF6	ENSG00000106290.15	ENSG00000106290.15:t:100114054-100114558	0.0140614569101929	0.0115405953040861	0.0010753286324939	0.053	0.086	t|1e1.1o1|1e2.1o1|1e3.2o2|1e4.1o1|1e5.1o2|1e6.1o1|i	FALSE	FALSE	TRUE	7	7	1	chr7	-	ENSG00000106290.15:t:100114054-100114558_100114268-100118518	100119204	100119317	100114268	100118518			4250	chr7:100114268-100118518	chr7:100119204-100119317	113	2	target	annotated	FALSE
TAF6	ENSG00000106290.15	ENSG00000106290.15:t:100114054-100114558	9.49240622365569e-06	7.30206865703555e-21	0.475082759357082	0.009	0.015	t|1e1.1o1|1e2.1o1|1e3.2o2|1e4.1o1|1e5.1o2|1e6.1o1|i	FALSE	FALSE	TRUE	7	7	1	chr7	-	ENSG00000106290.15:t:100114054-100114558_100114268-100116514	100119329	100119372	100114268	100116514			2246	chr7:100114268-100116514	chr7:100119329-100119372	43	1	target	annotated	FALSE
TAF6	ENSG00000106290.15	ENSG00000106290.15:t:100114054-100114558	-0.00111701027469038	1.69341887705204e-08	0.471671880675558	0.035	0.012	t|1e1.1o1|1e2.1o1|1e3.2o2|1e4.1o1|1e5.1o2|1e6.1o1|i	FALSE	FALSE	TRUE	7	7	0	chr7	-	ENSG00000106290.15:t:100114054-100114558_100114559-100116513	100119695	100119841	100114559	100116513			1954	chr7:100114559-100116513	chr7:100119695-100119841	146	2	target	none	FALSE
LZTS2	ENSG00000107816.17	ENSG00000107816.17:t:101002497-101003177	0.00363869481430072	0.000296802395715799	0.0175536294658966	0.028	0.039	t|1e1.1o1|1e2.1o1|1e3.1o1|1e4.1o1|i	FALSE	FALSE	TRUE	5	5	1	chr10	+	ENSG00000107816.17:t:101002497-101003177_100997234-101002497	100997072	100997234	100997234	101002497	100999953	101002496	5263	chr10:100997234-101002497	chr10:100997072-100997234	162	0	target	annotated	FALSE
LZTS2	ENSG00000107816.17	ENSG00000107816.17:t:101002497-101003177	0.0101976739165885	0.010900176832856	0.00105474219185733	0.066	0.092	t|1e1.1o1|1e2.1o1|1e3.1o1|1e4.1o1|i	FALSE	FALSE	TRUE	5	5	1	chr10	+	ENSG00000107816.17:t:101002497-101003177_100998410-101002497	100998348	100998410	100998410	101002497			4087	chr10:100998410-101002497	chr10:100998348-100998410	62	2	target	annotated	FALSE
LZTS2	ENSG00000107816.17	ENSG00000107816.17:t:101002497-101003177	0.0845187989975505	0.394597828693712	6.22043275528815e-05	0.083	0.191	t|1e1.1o1|1e2.1o1|1e3.1o1|1e4.1o1|i	FALSE	FALSE	TRUE	5	5	1	chr10	+	ENSG00000107816.17:t:101002497-101003177_100998981-101002497	100998687	100998981	100998981	101002497			3516	chr10:100998981-101002497	chr10:100998687-100998981	294	0	target	annotated	FALSE
LZTS2	ENSG00000107816.17	ENSG00000107816.17:t:101002497-101003177	-0.199960058451156	0.931476003306396	4.34416703765095e-06	0.508	0.283	t|1e1.1o1|1e2.1o1|1e3.1o1|1e4.1o1|i	FALSE	FALSE	TRUE	5	5	1	chr10	+	ENSG00000107816.17:t:101002497-101003177_100999952-101002497	100999476	100999952	100999952	101002497			2545	chr10:100999952-101002497	chr10:100999476-100999952	476	2	target	annotated	FALSE
LZTS2	ENSG00000107816.17	ENSG00000107816.17:t:101002497-101003177	0.0401769123736208	0.151208269024112	0.000167260719649943	0.312	0.392	t|1e1.1o1|1e2.1o1|1e3.1o1|1e4.1o1|i	FALSE	FALSE	TRUE	5	5	1	chr10	+	ENSG00000107816.17:t:101002497-101003177_100999953-101002496	101002497	101003177	100999953	101002496			2543	chr10:100999953-101002496	chr10:101002497-101003177	680	2	target	none	FALSE
C2orf42	ENSG00000115998.7	ENSG00000115998.7:s:70165528-70165635	0.136813087712691	0.693200024140265	2.54104543297398e-06	0.769	0.939	s|1e1.1o1|1e2.1o1	FALSE	FALSE	TRUE	2	3	1	chr2	-	ENSG00000115998.7:s:70165528-70165635_70165192-70165528	70160625	70160787	70165192	70165528			336	chr2:70165192-70165528	chr2:70160625-70160787	162	0	source	annotated	FALSE
C2orf42	ENSG00000115998.7	ENSG00000115998.7:s:70165528-70165635	-0.136813098472636	0.69320023568269	2.54117670173137e-06	0.231	0.061	s|1e1.1o1|1e2.1o1	FALSE	FALSE	TRUE	2	3	0	chr2	-	ENSG00000115998.7:s:70165528-70165635_70160787-70165528	70165092	70165192	70160787	70165528			4741	chr2:70160787-70165528	chr2:70165092-70165192	100	1	source	novel_exon_skip	FALSE
MAP7D1	ENSG00000116871.15	ENSG00000116871.15:t:36174898-36175091	0.184642072498361	0.976056182129566	1.52637012250322e-07	0.533	0.716	t|1e1.1o2|1e2.1o1|1e3.1o1|i	FALSE	FALSE	TRUE	4	4	1	chr1	+	ENSG00000116871.15:t:36174898-36175091_36173478-36174898	36173364	36173479	36173478	36174898	36173934	36174897	1420	chr1:36173478-36174898	chr1:36173364-36173479	115	1	target	annotated	FALSE
MAP7D1	ENSG00000116871.15	ENSG00000116871.15:t:36174898-36175091	7.77155985295739e-16	7.29950855916768e-21	0.999999999007135	0.006	0.002	t|1e1.1o2|1e2.1o1|1e3.1o1|i	FALSE	FALSE	TRUE	4	4	0	chr1	+	ENSG00000116871.15:t:36174898-36175091_36173827-36174898	36173616	36173827	36173827	36174898			1071	chr1:36173827-36174898	chr1:36173616-36173827	211	1	target	novel_donor	FALSE
MAP7D1	ENSG00000116871.15	ENSG00000116871.15:t:36174898-36175091	7.77155985295739e-16	7.29950855916768e-21	0.999999999007135	0.008	0.006	t|1e1.1o2|1e2.1o1|1e3.1o1|i	FALSE	FALSE	TRUE	4	4	0	chr1	+	ENSG00000116871.15:t:36174898-36175091_36173933-36174898	36173861	36173933	36173933	36174898			965	chr1:36173933-36174898	chr1:36173861-36173933	72	0	target	novel_donor	FALSE
MAP7D1	ENSG00000116871.15	ENSG00000116871.15:t:36174898-36175091	-0.179207481077818	0.968719165121648	6.2317173310511e-08	0.453	0.275	t|1e1.1o2|1e2.1o1|1e3.1o1|i	FALSE	FALSE	TRUE	4	4	0	chr1	+	ENSG00000116871.15:t:36174898-36175091_36173934-36174897	36174898	36175091	36173934	36174897			963	chr1:36173934-36174897	chr1:36174898-36175091	193	1	target	none	FALSE
RSRP1	ENSG00000117616.18	ENSG00000117616.18:s:25337040-25337411	0.1387601496377	0.745828554415655	1.60991602581237e-05	0.03	0.194	s|1e1.1o1|1e2.1o1|1e3.1o1|i	FALSE	FALSE	TRUE	4	4	1	chr1	-	ENSG00000117616.18:s:25337040-25337411_25318271-25337040	25304387	25304821	25318271	25337040	25336266	25337039	18769	chr1:25318271-25337040	chr1:25304387-25304821	434	2	source	annotated	FALSE
RSRP1	ENSG00000117616.18	ENSG00000117616.18:s:25337040-25337411	-0.00467315866835656	0.0299535849237639	0.000588093169112791	0.124	0.112	s|1e1.1o1|1e2.1o1|1e3.1o1|i	FALSE	FALSE	TRUE	4	4	1	chr1	-	ENSG00000117616.18:s:25337040-25337411_25306949-25337040	25306896	25306949	25306949	25337040			30091	chr1:25306949-25337040	chr1:25306896-25306949	53	2	source	annotated	FALSE
RSRP1	ENSG00000117616.18	ENSG00000117616.18:s:25337040-25337411	-0.0697707550611893	0.304713384730004	9.15761091611067e-05	0.163	0.058	s|1e1.1o1|1e2.1o1|1e3.1o1|i	FALSE	FALSE	TRUE	4	4	1	chr1	-	ENSG00000117616.18:s:25337040-25337411_25304821-25337040	25318063	25318271	25304821	25337040			32219	chr1:25304821-25337040	chr1:25318063-25318271	208	1	source	annotated	FALSE
RSRP1	ENSG00000117616.18	ENSG00000117616.18:s:25337040-25337411	-0.017979513722228	0.10309788934892	0.000230673069950171	0.684	0.641	s|1e1.1o1|1e2.1o1|1e3.1o1|i	FALSE	FALSE	TRUE	4	4	0	chr1	-	ENSG00000117616.18:s:25337040-25337411_25336266-25337039	25337040	25337411	25336266	25337039			773	chr1:25336266-25337039	chr1:25337040-25337411	371	2	source	none	FALSE
CCDC92	ENSG00000119242.8	ENSG00000119242.8:t:123944669-123944740	0.125137247962054	0.570089570925007	4.2035157590283e-05	0.374	0.572	t|1e1.1o1|i	FALSE	FALSE	FALSE	2	2	0	chr12	-	ENSG00000119242.8:t:123944669-123944740_123944740-123972529	123944669	123944740	123944740	123972529	123944741	123945703	27789	chr12:123944740-123972529	chr12:123944669-123944740	71	2	target	novel_combo	FALSE
CCDC92	ENSG00000119242.8	ENSG00000119242.8:t:123944669-123944740	-0.125137265938428	0.570089848137265	4.20379397939596e-05	0.626	0.428	t|1e1.1o1|i	FALSE	FALSE	FALSE	2	2	0	chr12	-	ENSG00000119242.8:t:123944669-123944740_123944741-123945703	123972529	123972831	123944741	123945703			962	chr12:123944741-123945703	chr12:123972529-123972831	302	2	target	none	FALSE
KCNIP2	ENSG00000120049.19	ENSG00000120049.19:s:101839753-101839872	0.192473878853502	0.973534255637645	2.66501102702682e-08	0.005	0.227	s|1e1.1o1|1e2.2o2	FALSE	FALSE	TRUE	2	3	0	chr10	-	ENSG00000120049.19:s:101839753-101839872_101831167-101839753	101829075	101829547	101831167	101839753			8586	chr10:101831167-101839753	chr10:101829075-101829547	472	1	source	novel_combo	TRUE
KCNIP2	ENSG00000120049.19	ENSG00000120049.19:s:101839753-101839872	-0.192473873371303	0.973534251268258	2.66517200531169e-08	0.995	0.773	s|1e1.1o1|1e2.2o2	FALSE	FALSE	TRUE	2	3	1	chr10	-	ENSG00000120049.19:s:101839753-101839872_101829199-101839753	101831072	101831167	101829199	101839753			10554	chr10:101829199-101839753	chr10:101831072-101831167	95	2	source	annotated	FALSE
KCNIP2	ENSG00000120049.19	ENSG00000120049.19:t:101829075-101829547	-0.00554770395701901	0.00982497885138141	0.000112053583453897	0.083	0.071	t|1e1.1o1|1e2.1o1|1e3.1o1|1e4.1o1	FALSE	FALSE	TRUE	4	5	1	chr10	-	ENSG00000120049.19:t:101829075-101829547_101829199-101843496	101829075	101829547	101829199	101843496			14297	chr10:101829199-101843496	chr10:101829075-101829547	472	1	target	annotated	FALSE
KCNIP2	ENSG00000120049.19	ENSG00000120049.19:t:101829075-101829547	-0.108221468896187	0.537034173430675	4.16678116266223e-06	0.863	0.72	t|1e1.1o1|1e2.1o1|1e3.1o1|1e4.1o1	FALSE	FALSE	TRUE	4	5	1	chr10	-	ENSG00000120049.19:t:101829075-101829547_101829199-101839753	101829844	101829942	101829199	101839753			10554	chr10:101829199-101839753	chr10:101829844-101829942	98	2	target	annotated	FALSE
KCNIP2	ENSG00000120049.19	ENSG00000120049.19:t:101829075-101829547	0.0741712904442128	0.256871455382145	1.07800734235841e-05	0.002	0.115	t|1e1.1o1|1e2.1o1|1e3.1o1|1e4.1o1	FALSE	FALSE	TRUE	4	5	1	chr10	-	ENSG00000120049.19:t:101829075-101829547_101829199-101831072	101831072	101831167	101829199	101831072			1873	chr10:101829199-101831072	chr10:101831072-101831167	95	2	target	annotated	FALSE
KCNIP2	ENSG00000120049.19	ENSG00000120049.19:t:101829075-101829547	0.0240008004174958	0.0375012169502386	4.49113300129925e-05	0.051	0.091	t|1e1.1o1|1e2.1o1|1e3.1o1|1e4.1o1	FALSE	FALSE	TRUE	4	5	1	chr10	-	ENSG00000120049.19:t:101829075-101829547_101829199-101829844	101839753	101839872	101829199	101829844			645	chr10:101829199-101829844	chr10:101839753-101839872	119	2	target	annotated	FALSE
CLTA	ENSG00000122705.17	ENSG00000122705.17:s:36204068-36204179	0.117709322141719	0.665178342863178	1.24270646904309e-06	0.615	0.728	s|1e1.1o1|1e2.1o1|1e3.1o3	FALSE	FALSE	TRUE	3	4	1	chr9	+	ENSG00000122705.17:s:36204068-36204179_36204179-36209267	36204068	36204179	36204179	36209267			5088	chr9:36204179-36209267	chr9:36204068-36204179	111	0	source	annotated	FALSE
CLTA	ENSG00000122705.17	ENSG00000122705.17:s:36204068-36204179	7.77155965710684e-16	8.56558349536148e-21	0.999999999943745	0.002	0.001	s|1e1.1o1|1e2.1o1|1e3.1o3	FALSE	FALSE	TRUE	3	4	1	chr9	+	ENSG00000122705.17:s:36204068-36204179_36204179-36210625	36209267	36209320	36204179	36210625			6446	chr9:36204179-36210625	chr9:36209267-36209320	53	2	source	annotated	FALSE
CLTA	ENSG00000122705.17	ENSG00000122705.17:s:36204068-36204179	-0.11504237898283	0.640220308708215	1.47767496794238e-06	0.383	0.272	s|1e1.1o1|1e2.1o1|1e3.1o3	FALSE	FALSE	TRUE	3	4	1	chr9	+	ENSG00000122705.17:s:36204068-36204179_36204179-36211603	36210625	36210661	36204179	36211603			7424	chr9:36204179-36211603	chr9:36210625-36210661	36	0	source	annotated	FALSE
CLTA	ENSG00000122705.17	ENSG00000122705.17:t:36211603-36212061	-0.100666907460751	0.512570671945413	2.70862570214137e-05	0.373	0.259	t|1e1.1o1|1e2.1o1|1e3.1o2|2e4.1o1|i	FALSE	TRUE	TRUE	5	5	1	chr9	+	ENSG00000122705.17:t:36211603-36212061_36204179-36211603	36204068	36204179	36204179	36211603	36210662	36211602	7424	chr9:36204179-36211603	chr9:36204068-36204179	111	0	target	annotated	FALSE
CLTA	ENSG00000122705.17	ENSG00000122705.17:t:36211603-36212061	0.114282441374835	0.645624553261429	8.4400938433387e-06	0.593	0.712	t|1e1.1o1|1e2.1o1|1e3.1o2|2e4.1o1|i	FALSE	TRUE	TRUE	5	5	1	chr9	+	ENSG00000122705.17:t:36211603-36212061_36209320-36211603	36209267	36209320	36209320	36211603			2283	chr9:36209320-36211603	chr9:36209267-36209320	53	2	target	annotated	FALSE
CLTA	ENSG00000122705.17	ENSG00000122705.17:t:36211603-36212061	7.77155985295739e-16	7.29950855916768e-21	0.999999999007135	0.019	0.019	t|1e1.1o1|1e2.1o1|1e3.1o2|2e4.1o1|i	FALSE	TRUE	TRUE	5	5	1	chr9	+	ENSG00000122705.17:t:36211603-36212061_36210660-36211603	36210625	36210661	36210660	36211603			943	chr9:36210660-36211603	chr9:36210625-36210661	36	0	target	annotated	FALSE
CLTA	ENSG00000122705.17	ENSG00000122705.17:t:36211603-36212061	7.77155985295739e-16	7.29950855916768e-21	0.999999999007135	0.01	0.005	t|1e1.1o1|1e2.1o1|1e3.1o2|2e4.1o1|i	FALSE	TRUE	TRUE	5	5	0	chr9	+	ENSG00000122705.17:t:36211603-36212061_36209320-36211608	36211603	36212061	36209320	36211608			2288	chr9:36209320-36211608	chr9:36211603-36212061	458	2	target	novel_acceptor	FALSE
CLTA	ENSG00000122705.17	ENSG00000122705.17:t:36211603-36212061	7.77155985295739e-16	7.29950855916768e-21	0.999999999007135	0.009	0.007	t|1e1.1o1|1e2.1o1|1e3.1o2|2e4.1o1|i	FALSE	TRUE	TRUE	5	5	0	chr9	+	ENSG00000122705.17:t:36211603-36212061_36210662-36211602			36210662	36211602			940	chr9:36210662-36211602	chr9:NA-NA			target	none	FALSE
MOCS1	ENSG00000124615.20	ENSG00000124615.20:t:39905059-39907117	0.03701449080171	0.171367612081796	1.4975134885839e-05	0.411	0.495	t|1e1.1o1|1e2.1o3|1e2.3o3	TRUE	FALSE	TRUE	3	3	1	chr6	-	ENSG00000124615.20:t:39905059-39907117_39907117-39909835	39905059	39907117	39907117	39909835			2718	chr6:39907117-39909835	chr6:39905059-39907117	2058	0	target	annotated	FALSE
MOCS1	ENSG00000124615.20	ENSG00000124615.20:t:39905059-39907117	-0.100107833559543	0.494183645090688	4.5395272155746e-06	0.208	0.074	t|1e1.1o1|1e2.1o3|1e2.3o3	TRUE	FALSE	TRUE	3	3	1	chr6	-	ENSG00000124615.20:t:39905059-39907117_39907117-39909055	39909040	39909102	39907117	39909055			1938	chr6:39907117-39909055	chr6:39909040-39909102	62	2	target	annotated	FALSE
MOCS1	ENSG00000124615.20	ENSG00000124615.20:t:39905059-39907117	0.0218168313754192	0.116858662663357	1.99643139679739e-05	0.379	0.43	t|1e1.1o1|1e2.1o3|1e2.3o3	TRUE	FALSE	TRUE	3	3	1	chr6	-	ENSG00000124615.20:t:39905059-39907117_39907117-39909040	39909835	39909955	39907117	39909040			1923	chr6:39907117-39909040	chr6:39909835-39909955	120	0	target	annotated	FALSE
SLC25A23	ENSG00000125648.15	ENSG00000125648.15:s:6438724-6438821	0.101771417861758	0.489818074449919	5.20500555380252e-06	0.772	0.926	s|1e1.1o1|1e2.2o2	FALSE	FALSE	TRUE	2	3	1	chr19	-	ENSG00000125648.15:s:6438724-6438821_6438534-6438724	6436079	6436468	6438534	6438724			190	chr19:6438534-6438724	chr19:6436079-6436468	389	2	source	annotated	FALSE
SLC25A23	ENSG00000125648.15	ENSG00000125648.15:s:6438724-6438821	-0.101771462848858	0.489818383886766	5.20525537273109e-06	0.228	0.074	s|1e1.1o1|1e2.2o2	FALSE	FALSE	TRUE	2	3	1	chr19	-	ENSG00000125648.15:s:6438724-6438821_6436464-6438724	6438447	6438534	6436464	6438724			2260	chr19:6436464-6438724	chr19:6438447-6438534	87	0	source	annotated	FALSE
RAP1B	ENSG00000127314.18	ENSG00000127314.18:s:68610855-68611056	7.77155965710684e-16	8.56558349536148e-21	0.999999999943745	0.008	0.003	s|1e1.2o3|1e2.2o3|1e3.2o3|2e4.2o3|2e5.2o3	TRUE	FALSE	TRUE	5	6	1	chr12	+	ENSG00000127314.18:s:68610855-68611056_68611043-68624671	68610855	68611056	68611043	68624671			13628	chr12:68611043-68624671	chr12:68610855-68611056	201	0	source	annotated	FALSE
RAP1B	ENSG00000127314.18	ENSG00000127314.18:s:68610855-68611056	7.77155965710684e-16	8.56558349536148e-21	0.999999999943745	0	0.004	s|1e1.2o3|1e2.2o3|1e3.2o3|2e4.2o3|2e5.2o3	TRUE	FALSE	TRUE	5	6	1	chr12	+	ENSG00000127314.18:s:68610855-68611056_68611043-68641038	68624508	68624873	68611043	68641038			29995	chr12:68611043-68641038	chr12:68624508-68624873	365	2	source	annotated	FALSE
RAP1B	ENSG00000127314.18	ENSG00000127314.18:s:68610855-68611056	-0.140541678141035	0.823193474927751	2.76256455822299e-07	0.743	0.598	s|1e1.2o3|1e2.2o3|1e3.2o3|2e4.2o3|2e5.2o3	TRUE	FALSE	TRUE	5	6	1	chr12	+	ENSG00000127314.18:s:68610855-68611056_68611043-68648699	68641034	68641153	68611043	68648699			37656	chr12:68611043-68648699	chr12:68641034-68641153	119	2	source	annotated	FALSE
RAP1B	ENSG00000127314.18	ENSG00000127314.18:s:68610855-68611056	7.77155965710684e-16	8.56558349536148e-21	0.999999999943745	0.002	0.002	s|1e1.2o3|1e2.2o3|1e3.2o3|2e4.2o3|2e5.2o3	TRUE	FALSE	TRUE	5	6	1	chr12	+	ENSG00000127314.18:s:68610855-68611056_68611052-68624671	68648670	68650041	68611052	68624671			13619	chr12:68611052-68624671	chr12:68648670-68650041	1371	0	source	annotated	FALSE
RAP1B	ENSG00000127314.18	ENSG00000127314.18:s:68610855-68611056	0.142140358706745	0.834873727599154	2.43982861295961e-07	0.246	0.392	s|1e1.2o3|1e2.2o3|1e3.2o3|2e4.2o3|2e5.2o3	TRUE	FALSE	TRUE	5	6	1	chr12	+	ENSG00000127314.18:s:68610855-68611056_68611052-68648699			68611052	68648699			37647	chr12:68611052-68648699	chr12:NA-NA			source	annotated	FALSE
RAP1B	ENSG00000127314.18	ENSG00000127314.18:t:68648670-68650041	-0.141237751203303	0.833290091110227	2.7243872946503e-07	0.739	0.593	t|1e1.3o5|1e1.4o5|1e2.2o2	TRUE	FALSE	TRUE	3	3	1	chr12	+	ENSG00000127314.18:t:68648670-68650041_68611043-68648699	68610855	68611056	68611043	68648699			37656	chr12:68611043-68648699	chr12:68610855-68611056	201	0	target	annotated	FALSE
RAP1B	ENSG00000127314.18	ENSG00000127314.18:t:68648670-68650041	0.141045831576726	0.832822354228655	2.5428795478763e-07	0.245	0.39	t|1e1.3o5|1e1.4o5|1e2.2o2	TRUE	FALSE	TRUE	3	3	1	chr12	+	ENSG00000127314.18:t:68648670-68650041_68611052-68648699	68624508	68624873	68611052	68648699			37647	chr12:68611052-68648699	chr12:68624508-68624873	365	2	target	annotated	FALSE
RAP1B	ENSG00000127314.18	ENSG00000127314.18:t:68648670-68650041	6.13574925909671e-10	8.56558387250431e-21	0.999030275488942	0.016	0.015	t|1e1.3o5|1e1.4o5|1e2.2o2	TRUE	FALSE	TRUE	3	3	1	chr12	+	ENSG00000127314.18:t:68648670-68650041_68624873-68648699	68648670	68650041	68624873	68648699			23826	chr12:68624873-68648699	chr12:68648670-68650041	1371	0	target	annotated	FALSE
MINDY2	ENSG00000128923.11	ENSG00000128923.11:s:58851771-58851965	0.106692449303431	0.541712178585105	3.77735598858527e-06	0.719	0.85	s|1e1.1o2|1e1.2o2	FALSE	TRUE	FALSE	2	2	1	chr15	+	ENSG00000128923.11:s:58851771-58851965_58851965-58854482	58851771	58851965	58851965	58854482			2517	chr15:58851965-58854482	chr15:58851771-58851965	194	2	source	annotated	FALSE
MINDY2	ENSG00000128923.11	ENSG00000128923.11:s:58851771-58851965	-0.106692505865463	0.541712683200639	3.77756612734981e-06	0.281	0.15	s|1e1.1o2|1e1.2o2	FALSE	TRUE	FALSE	2	2	1	chr15	+	ENSG00000128923.11:s:58851771-58851965_58851965-58854485	58854482	58861900	58851965	58854485			2520	chr15:58851965-58854485	chr15:58854482-58861900	7418	2	source	annotated	FALSE
METTL26	ENSG00000130731.16	ENSG00000130731.16:t:635281-635340	0.102340119197469	0.527904092504437	3.43239213756344e-05	0.244	0.353	t|1e1.1o1|1e2.1o2|1e2.2o2|i	TRUE	FALSE	TRUE	4	3	1	chr16	-	ENSG00000130731.16:t:635281-635340_635340-636094	635281	635340	635340	636094	635341	635517	754	chr16:635340-636094	chr16:635281-635340	59	2	target	annotated	FALSE
METTL26	ENSG00000130731.16	ENSG00000130731.16:t:635281-635340	-0.0824860734077214	0.374367350643244	6.93151257625813e-05	0.454	0.362	t|1e1.1o1|1e2.1o2|1e2.2o2|i	TRUE	FALSE	TRUE	4	3	1	chr16	-	ENSG00000130731.16:t:635281-635340_635340-635612	635518	635774	635340	635612			272	chr16:635340-635612	chr16:635518-635774	256	1	target	annotated	FALSE
METTL26	ENSG00000130731.16	ENSG00000130731.16:t:635281-635340	7.77155985295739e-16	7.29950855916768e-21	0.999999999007135	0.014	0.01	t|1e1.1o1|1e2.1o2|1e2.2o2|i	TRUE	FALSE	TRUE	4	3	1	chr16	-	ENSG00000130731.16:t:635281-635340_635340-635518	636094	636366	635340	635518			178	chr16:635340-635518	chr16:636094-636366	272	2	target	annotated	FALSE
METTL26	ENSG00000130731.16	ENSG00000130731.16:t:635281-635340	-0.00830480519575525	0.00464407135995092	0.00263624231797854	0.288	0.276	t|1e1.1o1|1e2.1o2|1e2.2o2|i	TRUE	FALSE	TRUE	4	3	0	chr16	-	ENSG00000130731.16:t:635281-635340_635341-635517			635341	635517			176	chr16:635341-635517	chr16:NA-NA			target	none	FALSE
LDHA	ENSG00000134333.14	ENSG00000134333.14:t:18396818-18397398	0.179586147244325	0.949886125020219	9.77598567289214e-08	0.494	0.676	t|1e1.1o2|1e2.1o1	FALSE	FALSE	TRUE	2	3	1	chr11	+	ENSG00000134333.14:t:18396818-18397398_18394636-18396819	18394560	18394641	18394636	18396819			2183	chr11:18394636-18396819	chr11:18394560-18394641	81	0	target	annotated	FALSE
LDHA	ENSG00000134333.14	ENSG00000134333.14:t:18396818-18397398	-0.179586136059669	0.949886088809742	9.77643986876942e-08	0.506	0.324	t|1e1.1o2|1e2.1o1	FALSE	FALSE	TRUE	2	3	1	chr11	+	ENSG00000134333.14:t:18396818-18397398_18396610-18396819	18396266	18396610	18396610	18396819			209	chr11:18396610-18396819	chr11:18396266-18396610	344	2	target	annotated	FALSE
DTX1	ENSG00000135144.7	ENSG00000135144.7:t:113093162-113093223	0.0757659928803048	0.268700696096033	0.000121481022746222	0.014	0.113	t|1e1.2o2|1e2.1o1|i	FALSE	FALSE	TRUE	3	3	0	chr12	+	ENSG00000135144.7:t:113093162-113093223_113058451-113093162	113057449	113058451	113058451	113093162	113090061	113093161	34711	chr12:113058451-113093162	chr12:113057449-113058451	1002	0	target	novel_exon_skip	FALSE
DTX1	ENSG00000135144.7	ENSG00000135144.7:t:113093162-113093223	-0.127180899195468	0.685710068013505	2.05526907121056e-05	0.944	0.8	t|1e1.2o2|1e2.1o1|i	FALSE	FALSE	TRUE	3	3	1	chr12	+	ENSG00000135144.7:t:113093162-113093223_113078105-113093162	113077424	113078105	113078105	113093162			15057	chr12:113078105-113093162	chr12:113077424-113078105	681	0	target	annotated	FALSE
DTX1	ENSG00000135144.7	ENSG00000135144.7:t:113093162-113093223	0.0290647001913383	0.0456237957826431	0.000516616966950174	0.043	0.087	t|1e1.2o2|1e2.1o1|i	FALSE	FALSE	TRUE	3	3	0	chr12	+	ENSG00000135144.7:t:113093162-113093223_113090061-113093161	113093162	113093223	113090061	113093161			3100	chr12:113090061-113093161	chr12:113093162-113093223	61	1	target	none	FALSE
FNBP1L	ENSG00000137942.16	ENSG00000137942.16:s:93522888-93523091	-0.34285354105985	0.978354450318862	8.37377736817579e-07	0.875	0.503	s|1e1.1o2|1e2.2o2	FALSE	FALSE	TRUE	2	3	0	chr1	+	ENSG00000137942.16:s:93522888-93523091_93523091-93523344	93522888	93523091	93523091	93523344			253	chr1:93523091-93523344	chr1:93522888-93523091	203	2	source	novel_donor	FALSE
FNBP1L	ENSG00000137942.16	ENSG00000137942.16:s:93522888-93523091	0.34285350530943	0.978354407144825	8.37342290018573e-07	0.125	0.497	s|1e1.1o2|1e2.2o2	FALSE	FALSE	TRUE	2	3	0	chr1	+	ENSG00000137942.16:s:93522888-93523091_93523091-93524261	93523344	93523491	93523091	93524261			1170	chr1:93523091-93524261	chr1:93523344-93523491	147	0	source	novel_donor	FALSE
FNBP1L	ENSG00000137942.16	ENSG00000137942.16:t:93541042-93541056	0.111666709481684	0.558173607498381	3.89402565743406e-06	0.352	0.49	t|1e1.1o1|1e2.1o1	FALSE	FALSE	TRUE	2	3	0	chr1	+	ENSG00000137942.16:t:93541042-93541056_93534908-93541042	93534705	93534908	93534908	93541042			6134	chr1:93534908-93541042	chr1:93534705-93534908	203	2	target	novel_exon_skip	FALSE
FNBP1L	ENSG00000137942.16	ENSG00000137942.16:t:93541042-93541056	-0.111666724084559	0.558173897987449	3.89423899138652e-06	0.648	0.51	t|1e1.1o1|1e2.1o1	FALSE	FALSE	TRUE	2	3	1	chr1	+	ENSG00000137942.16:t:93541042-93541056_93536490-93541042	93536332	93536490	93536490	93541042			4552	chr1:93536490-93541042	chr1:93536332-93536490	158	2	target	annotated	FALSE
G3BP2	ENSG00000138757.14	ENSG00000138757.14:s:75724056-75724176	0.0798323395909444	0.313060634322876	7.06114406069904e-06	0.023	0.118	s|1e1.1o1|1e2.1o1|1e3.2o2	FALSE	FALSE	TRUE	3	4	0	chr4	-	ENSG00000138757.14:s:75724056-75724176_75722244-75724056		75722244	75722244	75724056			1812	chr4:75722244-75724056	chr4:nan-75722244			source	novel_acceptor	FALSE
G3BP2	ENSG00000138757.14	ENSG00000138757.14:s:75724056-75724176	0.0677807289568781	0.280550555523446	8.83518087234743e-06	0.146	0.243	s|1e1.1o1|1e2.1o1|1e3.2o2	FALSE	FALSE	TRUE	3	4	1	chr4	-	ENSG00000138757.14:s:75724056-75724176_75694929-75724056	75661515	75662073	75694929	75724056			29127	chr4:75694929-75724056	chr4:75661515-75662073	558	0	source	annotated	FALSE
G3BP2	ENSG00000138757.14	ENSG00000138757.14:s:75724056-75724176	-0.173639757954203	0.868174542819371	1.02182993810818e-06	0.831	0.634	s|1e1.1o1|1e2.1o1|1e3.2o2	FALSE	FALSE	TRUE	3	4	1	chr4	-	ENSG00000138757.14:s:75724056-75724176_75662049-75724056	75694798	75694929	75662049	75724056			62007	chr4:75662049-75724056	chr4:75694798-75694929	131	2	source	annotated	FALSE
G3BP2	ENSG00000138757.14	ENSG00000138757.14:t:75694798-75694929	-0.234454721609704	0.887988920557329	1.73273266368401e-06	0.668	0.385	t|1e1.1o1|1e2.1o1	FALSE	FALSE	TRUE	2	3	1	chr4	-	ENSG00000138757.14:t:75694798-75694929_75694929-75724276	75694798	75694929	75694929	75724276			29347	chr4:75694929-75724276	chr4:75694798-75694929	131	2	target	annotated	FALSE
G3BP2	ENSG00000138757.14	ENSG00000138757.14:t:75694798-75694929	0.234454668490048	0.88798887309227	1.73265409866174e-06	0.332	0.615	t|1e1.1o1|1e2.1o1	FALSE	FALSE	TRUE	2	3	1	chr4	-	ENSG00000138757.14:t:75694798-75694929_75694929-75724056	75724056	75724176	75694929	75724056			29127	chr4:75694929-75724056	chr4:75724056-75724176	120	0	target	annotated	FALSE
BAHD1	ENSG00000140320.12	ENSG00000140320.12:s:40464471-40464547	0.182908333301979	0.918535291192671	4.72749643862501e-06	0.346	0.538	s|1e1.2o3|1e1.3o3|i	FALSE	TRUE	FALSE	3	2	1	chr15	+	ENSG00000140320.12:s:40464471-40464547_40464547-40465335	40464471	40464547	40464547	40465335	40464548	40464909	788	chr15:40464547-40465335	chr15:40464471-40464547	76	1	source	annotated	FALSE
BAHD1	ENSG00000140320.12	ENSG00000140320.12:s:40464471-40464547	-0.169843142027342	0.887582220353947	5.99341834117695e-06	0.413	0.232	s|1e1.2o3|1e1.3o3|i	FALSE	TRUE	FALSE	3	2	1	chr15	+	ENSG00000140320.12:s:40464471-40464547_40464547-40465344	40464910	40465435	40464547	40465344			797	chr15:40464547-40465344	chr15:40464910-40465435	525	0	source	annotated	FALSE
BAHD1	ENSG00000140320.12	ENSG00000140320.12:s:40464471-40464547	-0.00748410424705893	0.00899650542103261	0.00156259825083904	0.253	0.234	s|1e1.2o3|1e1.3o3|i	FALSE	TRUE	FALSE	3	2	0	chr15	+	ENSG00000140320.12:s:40464471-40464547_40464548-40464909			40464548	40464909			361	chr15:40464548-40464909	chr15:NA-NA			source	none	FALSE
DHX38	ENSG00000140829.12	ENSG00000140829.12:s:72104486-72104626	0.103216982339329	0.532069439684522	3.98663639452231e-05	0.649	0.776	s|1e1.1o1|i	FALSE	FALSE	FALSE	2	2	1	chr16	+	ENSG00000140829.12:s:72104486-72104626_72104626-72105027	72104486	72104626	72104626	72105027	72104627	72105026	401	chr16:72104626-72105027	chr16:72104486-72104626	140	2	source	annotated	FALSE
DHX38	ENSG00000140829.12	ENSG00000140829.12:s:72104486-72104626	-0.103217001744497	0.532069668570363	3.98695550895001e-05	0.351	0.224	s|1e1.1o1|i	FALSE	FALSE	FALSE	2	2	0	chr16	+	ENSG00000140829.12:s:72104486-72104626_72104627-72105026	72105027	72105137	72104627	72105026			399	chr16:72104627-72105026	chr16:72105027-72105137	110	2	source	none	FALSE
DHX38	ENSG00000140829.12	ENSG00000140829.12:s:72107645-72107877	0.180651121500534	0.932733317122741	2.6459697967371e-06	0.645	0.831	s|1e1.1o5|2e1.2o5|i	TRUE	TRUE	FALSE	3	2	1	chr16	+	ENSG00000140829.12:s:72107645-72107877_72107799-72108227	72107645	72107877	72107799	72108227	72107878	72108226	428	chr16:72107799-72108227	chr16:72107645-72107877	232	1	source	annotated	FALSE
DHX38	ENSG00000140829.12	ENSG00000140829.12:s:72107645-72107877	-0.087022646089592	0.405936255010734	4.86000990808089e-05	0.177	0.076	s|1e1.1o5|2e1.2o5|i	TRUE	TRUE	FALSE	3	2	0	chr16	+	ENSG00000140829.12:s:72107645-72107877_72107877-72108296	72108227	72108382	72107877	72108296			419	chr16:72107877-72108296	chr16:72108227-72108382	155	2	source	novel_donor	FALSE
DHX38	ENSG00000140829.12	ENSG00000140829.12:s:72107645-72107877	-0.0738204973692735	0.312163468303096	8.92140775987649e-05	0.182	0.094	s|1e1.1o5|2e1.2o5|i	TRUE	TRUE	FALSE	3	2	0	chr16	+	ENSG00000140829.12:s:72107645-72107877_72107878-72108226			72107878	72108226			348	chr16:72107878-72108226	chr16:NA-NA			source	none	FALSE
DHX38	ENSG00000140829.12	ENSG00000140829.12:s:72109415-72109756	0.127304906101562	0.719191594149299	1.15925234998054e-05	0.705	0.839	s|1e1.1o2|i	FALSE	FALSE	FALSE	2	2	1	chr16	+	ENSG00000140829.12:s:72109415-72109756_72109510-72110956	72109415	72109756	72109510	72110956	72109757	72110955	1446	chr16:72109510-72110956	chr16:72109415-72109756	341	2	source	annotated	FALSE
DHX38	ENSG00000140829.12	ENSG00000140829.12:s:72109415-72109756	-0.127304965070859	0.719192025801068	1.15934392668215e-05	0.295	0.161	s|1e1.1o2|i	FALSE	FALSE	FALSE	2	2	0	chr16	+	ENSG00000140829.12:s:72109415-72109756_72109757-72110955	72110956	72111077	72109757	72110955			1198	chr16:72109757-72110955	chr16:72110956-72111077	121	1	source	none	FALSE
NBPF3	ENSG00000142794.18	ENSG00000142794.18:s:21444944-21445219	0.167645649469277	0.782909136311067	2.15075855769528e-06	0.456	0.665	s|1e1.1o1|1e2.1o1|1e3.1o1	FALSE	FALSE	TRUE	3	4	1	chr1	+	ENSG00000142794.18:s:21444944-21445219_21445219-21453373	21444944	21445219	21445219	21453373			8154	chr1:21445219-21453373	chr1:21444944-21445219	275	2	source	annotated	FALSE
NBPF3	ENSG00000142794.18	ENSG00000142794.18:s:21444944-21445219	0.161333945208321	0.835265056564922	1.18289212854944e-06	0.08	0.264	s|1e1.1o1|1e2.1o1|1e3.1o1	FALSE	FALSE	TRUE	3	4	0	chr1	+	ENSG00000142794.18:s:21444944-21445219_21445219-21454856	21453373	21454306	21445219	21454856			9637	chr1:21445219-21454856	chr1:21453373-21454306	933	0	source	novel_acceptor	FALSE
NBPF3	ENSG00000142794.18	ENSG00000142794.18:s:21444944-21445219	-0.389135838712337	0.999982332638904	1.06809794342411e-09	0.464	0.073	s|1e1.1o1|1e2.1o1|1e3.1o1	FALSE	FALSE	TRUE	3	4	1	chr1	+	ENSG00000142794.18:s:21444944-21445219_21445219-21466087	21454856		21445219	21466087			20868	chr1:21445219-21466087	chr1:21454856-nan			source	annotated	FALSE
CAND2	ENSG00000144712.12	ENSG00000144712.12:s:12803488-12803631	-0.184316245752678	0.879931723216301	8.35141949373508e-06	0.261	0.047	s|1e1.1o1|1e2.2o2|i	FALSE	FALSE	TRUE	3	3	1	chr3	+	ENSG00000144712.12:s:12803488-12803631_12803631-12806389	12803488	12803631	12803631	12806389	12803632	12806388	2758	chr3:12803631-12806389	chr3:12803488-12803631	143	2	source	annotated	FALSE
CAND2	ENSG00000144712.12	ENSG00000144712.12:s:12803488-12803631	0.163659989466417	0.742087490284655	2.25703829585068e-05	0.63	0.845	s|1e1.1o1|1e2.2o2|i	FALSE	FALSE	TRUE	3	3	1	chr3	+	ENSG00000144712.12:s:12803488-12803631_12803631-12807306	12806389	12806496	12803631	12807306			3675	chr3:12803631-12807306	chr3:12806389-12806496	107	2	source	annotated	FALSE
CAND2	ENSG00000144712.12	ENSG00000144712.12:s:12803488-12803631	-0.00247168546955381	0.0360402576956725	0.000505105438404541	0.108	0.107	s|1e1.1o1|1e2.2o2|i	FALSE	FALSE	TRUE	3	3	0	chr3	+	ENSG00000144712.12:s:12803488-12803631_12803632-12806388	12807133	12807460	12803632	12806388			2756	chr3:12803632-12806388	chr3:12807133-12807460	327	0	source	none	FALSE
ZMYM3	ENSG00000147130.14	ENSG00000147130.14:s:71246595-71246692	-0.160631672079259	0.863572061153261	7.66969699195208e-07	0.325	0.152	s|1e1.1o1|2e1.1o1	TRUE	FALSE	FALSE	2	2	1	chrX	-	ENSG00000147130.14:s:71246595-71246692_71246512-71246631	71246353	71246512	71246512	71246631			119	chrX:71246512-71246631	chrX:71246353-71246512	159	0	source	annotated	FALSE
ZMYM3	ENSG00000147130.14	ENSG00000147130.14:s:71246595-71246692	0.160631647317247	0.863571927932554	7.66932264832964e-07	0.675	0.848	s|1e1.1o1|2e1.1o1	TRUE	FALSE	FALSE	2	2	1	chrX	-	ENSG00000147130.14:s:71246595-71246692_71246512-71246595	71246595	71246692	71246512	71246595			83	chrX:71246512-71246595	chrX:71246595-71246692	97	1	source	annotated	FALSE
SEC16A	ENSG00000148396.18	ENSG00000148396.18:s:136447227-136447364	0.134256854790334	0.719619029841718	1.89978487621755e-06	0.291	0.439	s|1e1.1o2|1e1.2o2	FALSE	TRUE	FALSE	2	2	1	chr9	-	ENSG00000148396.18:s:136447227-136447364_136447015-136447227	136446855	136447015	136447015	136447227			212	chr9:136447015-136447227	chr9:136446855-136447015	160	1	source	annotated	FALSE
SEC16A	ENSG00000148396.18	ENSG00000148396.18:s:136447227-136447364	-0.134256895985696	0.719619297929886	1.89988664944796e-06	0.709	0.561	s|1e1.1o2|1e1.2o2	FALSE	TRUE	FALSE	2	2	1	chr9	-	ENSG00000148396.18:s:136447227-136447364_136446949-136447227	136447227	136447364	136446949	136447227			278	chr9:136446949-136447227	chr9:136447227-136447364	137	2	source	annotated	FALSE
HNRNPU	ENSG00000153187.20	ENSG00000153187.20:t:244846486-244846706	0.118782700587846	0.585491827604235	3.68386750520633e-05	0.14	0.304	t|1e1.1o1|i	FALSE	FALSE	FALSE	2	2	1	chr1	-	ENSG00000153187.20:t:244846486-244846706_244846706-244848788	244846486	244846706	244846706	244848788	244846707	244847001	2082	chr1:244846706-244848788	chr1:244846486-244846706	220	1	target	annotated	FALSE
HNRNPU	ENSG00000153187.20	ENSG00000153187.20:t:244846486-244846706	-0.118782710995963	0.585492093214469	3.68414612490486e-05	0.86	0.696	t|1e1.1o1|i	FALSE	FALSE	FALSE	2	2	1	chr1	-	ENSG00000153187.20:t:244846486-244846706_244846707-244847001	244848788	244848889	244846707	244847001			294	chr1:244846707-244847001	chr1:244848788-244848889	101	2	target	none	FALSE
TSEN2	ENSG00000154743.17	ENSG00000154743.17:s:12484432-12484880	0.0897636694383564	0.420159995840613	6.34351772604933e-06	0.327	0.455	s|1e1.2o2|2e1.2o2|3e1.2o2	TRUE	FALSE	FALSE	3	2	1	chr3	+	ENSG00000154743.17:s:12484432-12484880_12484517-12489784	12484432	12484880	12484517	12489784			5267	chr3:12484517-12489784	chr3:12484432-12484880	448	1	source	annotated	FALSE
TSEN2	ENSG00000154743.17	ENSG00000154743.17:s:12484432-12484880	0.0289113901546157	0.0515227400162202	3.74102390492289e-05	0.067	0.119	s|1e1.2o2|2e1.2o2|3e1.2o2	TRUE	FALSE	FALSE	3	2	1	chr3	+	ENSG00000154743.17:s:12484432-12484880_12484628-12489784	12489780	12489989	12484628	12489784			5156	chr3:12484628-12489784	chr3:12489780-12489989	209	2	source	annotated	FALSE
TSEN2	ENSG00000154743.17	ENSG00000154743.17:s:12484432-12484880	-0.145327559399946	0.694666025909392	2.93562042830153e-06	0.606	0.424	s|1e1.2o2|2e1.2o2|3e1.2o2	TRUE	FALSE	FALSE	3	2	1	chr3	+	ENSG00000154743.17:s:12484432-12484880_12484880-12489784			12484880	12489784			4904	chr3:12484880-12489784	chr3:NA-NA			source	annotated	FALSE
PRR14	ENSG00000156858.11	ENSG00000156858.11:s:30654109-30654339	-0.10696995612177	0.555559322065531	2.78296235511899e-06	0.954	0.847	s|1e1.1o1|1e2.1o2	FALSE	FALSE	TRUE	2	3	1	chr16	+	ENSG00000156858.11:s:30654109-30654339_30654339-30654629	30654109	30654339	30654339	30654629			290	chr16:30654339-30654629	chr16:30654109-30654339	230	2	source	annotated	FALSE
PRR14	ENSG00000156858.11	ENSG00000156858.11:s:30654109-30654339	0.106969838606399	0.555558181588073	2.78280892757112e-06	0.046	0.153	s|1e1.1o1|1e2.1o2	FALSE	FALSE	TRUE	2	3	0	chr16	+	ENSG00000156858.11:s:30654109-30654339_30654339-30655351	30654629	30654698	30654339	30655351			1012	chr16:30654339-30655351	chr16:30654629-30654698	69	0	source	novel_exon_skip	TRUE
ZSCAN12	ENSG00000158691.14	ENSG00000158691.14:t:28382191-28382609	-0.0904216856607903	0.429322986839161	5.44261512325228e-06	0.396	0.279	t|1e1.1o2|1e1.2o2|1e2.1o1|1e3.1o1|1e4.1o1	TRUE	FALSE	TRUE	5	5	1	chr6	-	ENSG00000158691.14:t:28382191-28382609_28382609-28390596	28382191	28382609	28382609	28390596			7987	chr6:28382609-28390596	chr6:28382191-28382609	418	1	target	annotated	FALSE
ZSCAN12	ENSG00000158691.14	ENSG00000158691.14:t:28382191-28382609	-0.0377861880636068	0.0766667370678288	2.88315658011351e-05	0.172	0.112	t|1e1.1o2|1e1.2o2|1e2.1o1|1e3.1o1|1e4.1o1	TRUE	FALSE	TRUE	5	5	0	chr6	-	ENSG00000158691.14:t:28382191-28382609_28382609-28390418	28383264		28382609	28390418			7809	chr6:28382609-28390418	chr6:28383264-nan			target	novel_donor	FALSE
ZSCAN12	ENSG00000158691.14	ENSG00000158691.14:t:28382191-28382609	-0.00495677286079528	0.00181347559211719	0.000489042018308794	0.067	0.059	t|1e1.1o2|1e1.2o2|1e2.1o1|1e3.1o1|1e4.1o1	TRUE	FALSE	TRUE	5	5	0	chr6	-	ENSG00000158691.14:t:28382191-28382609_28382609-28386155	28383329		28382609	28386155			3546	chr6:28382609-28386155	chr6:28383329-nan			target	novel_donor	FALSE
ZSCAN12	ENSG00000158691.14	ENSG00000158691.14:t:28382191-28382609	0.109143943102241	0.566653700961042	3.17325824790323e-06	0.132	0.261	t|1e1.1o2|1e1.2o2|1e2.1o1|1e3.1o1|1e4.1o1	TRUE	FALSE	TRUE	5	5	0	chr6	-	ENSG00000158691.14:t:28382191-28382609_28382609-28383329	28386155		28382609	28383329			720	chr6:28382609-28383329	chr6:28386155-nan			target	novel_donor	FALSE
ZSCAN12	ENSG00000158691.14	ENSG00000158691.14:t:28382191-28382609	0.0331713902555775	0.0833968973623936	2.500857974457e-05	0.232	0.288	t|1e1.1o2|1e1.2o2|1e2.1o1|1e3.1o1|1e4.1o1	TRUE	FALSE	TRUE	5	5	0	chr6	-	ENSG00000158691.14:t:28382191-28382609_28382609-28383264	28390418	28391742	28382609	28383264			655	chr6:28382609-28383264	chr6:28390418-28391742	1324	1	target	novel_donor	FALSE
TMEM69	ENSG00000159596.7	ENSG00000159596.7:t:45693204-45694436	0.104809297218922	0.54044227777768	3.86255407928887e-05	0.336	0.46	t|1e1.2o2|1e2.1o1|i	FALSE	FALSE	TRUE	3	3	1	chr1	+	ENSG00000159596.7:t:45693204-45694436_45688275-45693204	45688181	45688275	45688275	45693204	45691111	45693203	4929	chr1:45688275-45693204	chr1:45688181-45688275	94	1	target	annotated	FALSE
TMEM69	ENSG00000159596.7	ENSG00000159596.7:t:45693204-45694436	-0.086430273130313	0.406662855040963	6.32116101734193e-05	0.635	0.525	t|1e1.2o2|1e2.1o1|i	FALSE	FALSE	TRUE	3	3	1	chr1	+	ENSG00000159596.7:t:45693204-45694436_45691110-45693204	45690974	45691110	45691110	45693204			2094	chr1:45691110-45693204	chr1:45690974-45691110	136	1	target	annotated	FALSE
TMEM69	ENSG00000159596.7	ENSG00000159596.7:t:45693204-45694436	-0.00236245342785474	4.03762524995929e-07	0.440325489698181	0.027	0.014	t|1e1.2o2|1e2.1o1|i	FALSE	FALSE	TRUE	3	3	0	chr1	+	ENSG00000159596.7:t:45693204-45694436_45691111-45693203	45693204	45694436	45691111	45693203			2092	chr1:45691111-45693203	chr1:45693204-45694436	1232	2	target	none	FALSE
RECQL4	ENSG00000160957.13	ENSG00000160957.13:s:144515764-144515890	-0.10874857328109	0.525652707084878	4.59947857522902e-06	0.885	0.736	s|1e1.1o2|1e1.2o2	FALSE	TRUE	FALSE	2	2	1	chr8	-	ENSG00000160957.13:s:144515764-144515890_144515457-144515764	144515326	144515457	144515457	144515764			307	chr8:144515457-144515764	chr8:144515326-144515457	131	2	source	annotated	FALSE
RECQL4	ENSG00000160957.13	ENSG00000160957.13:s:144515764-144515890	0.108748570113629	0.525652537756376	4.59922852128863e-06	0.115	0.264	s|1e1.1o2|1e1.2o2	FALSE	TRUE	FALSE	2	2	0	chr8	-	ENSG00000160957.13:s:144515764-144515890_144515453-144515764	144515764	144515890	144515453	144515764			311	chr8:144515453-144515764	chr8:144515764-144515890	126	0	source	novel_acceptor	FALSE
LRRC56	ENSG00000161328.11	ENSG00000161328.11:s:537527-537605	-0.0749156773393746	0.323520603655475	7.61061505849536e-06	0.201	0.097	s|1e1.1o2|1e1.2o2|1e2.1o1	FALSE	TRUE	TRUE	3	3	0	chr11	+	ENSG00000161328.11:s:537527-537605_537605-538523	537527	537605	537605	538523			918	chr11:537605-538523	chr11:537527-537605	78	0	source	novel_acceptor	FALSE
LRRC56	ENSG00000161328.11	ENSG00000161328.11:s:537527-537605	0.167591784374024	0.828251662027111	1.4448410743604e-06	0.631	0.825	s|1e1.1o2|1e1.2o2|1e2.1o1	FALSE	TRUE	TRUE	3	3	1	chr11	+	ENSG00000161328.11:s:537527-537605_537605-538598	538523	538860	537605	538598			993	chr11:537605-538598	chr11:538523-538860	337	1	source	annotated	FALSE
LRRC56	ENSG00000161328.11	ENSG00000161328.11:s:537527-537605	-0.0606117662378357	0.219735334084837	1.1100484916815e-05	0.168	0.079	s|1e1.1o2|1e1.2o2|1e2.1o1	FALSE	TRUE	TRUE	3	3	0	chr11	+	ENSG00000161328.11:s:537527-537605_537605-539580	539580	539726	537605	539580			1975	chr11:537605-539580	chr11:539580-539726	146	2	source	novel_exon_skip	FALSE
TPCN2	ENSG00000162341.18	ENSG00000162341.18:s:69070430-69070495	-0.145516644561707	0.730393916435318	2.26240516243426e-06	0.251	0.073	s|1e1.1o2|1e1.2o2	FALSE	TRUE	FALSE	2	2	0	chr11	+	ENSG00000162341.18:s:69070430-69070495_69070495-69071256	69070430	69070495	69070495	69071256			761	chr11:69070495-69071256	chr11:69070430-69070495	65	2	source	novel_acceptor	FALSE
TPCN2	ENSG00000162341.18	ENSG00000162341.18:s:69070430-69070495	0.145516613876917	0.730393678804849	2.26229034596822e-06	0.749	0.927	s|1e1.1o2|1e1.2o2	FALSE	TRUE	FALSE	2	2	1	chr11	+	ENSG00000162341.18:s:69070430-69070495_69070495-69071356	69071256	69071420	69070495	69071356			861	chr11:69070495-69071356	chr11:69071256-69071420	164	2	source	annotated	FALSE
KIF26B	ENSG00000162849.16	ENSG00000162849.16:s:245419579-245419745	0.178364458528508	0.943032603575617	9.72691297241178e-08	0.002	0.209	s|1e1.1o1|1e2.1o1	FALSE	FALSE	TRUE	2	3	0	chr1	+	ENSG00000162849.16:s:245419579-245419745_245419745-245464259	245419579	245419745	245419745	245464259			44514	chr1:245419745-245464259	chr1:245419579-245419745	166	1	source	novel_acceptor	TRUE
KIF26B	ENSG00000162849.16	ENSG00000162849.16:s:245419579-245419745	-0.178364457926541	0.943032654833282	9.72730438419944e-08	0.998	0.791	s|1e1.1o1|1e2.1o1	FALSE	FALSE	TRUE	2	3	1	chr1	+	ENSG00000162849.16:s:245419579-245419745_245419745-245540767	245464259		245419745	245540767			121022	chr1:245419745-245540767	chr1:245464259-nan			source	annotated	FALSE
SNAPC4	ENSG00000165684.4	ENSG00000165684.4:s:136387485-136387579	0.211908946874972	0.97083434237681	1.16632544598368e-06	0.143	0.369	s|1e1.1o1|2e1.1o1|i	TRUE	FALSE	FALSE	3	2	0	chr9	-	ENSG00000165684.4:s:136387485-136387579_136384814-136387513	136384720	136384814	136384814	136387513	136384815	136387484	2699	chr9:136384814-136387513	chr9:136384720-136384814	94	1	source	novel_donor	FALSE
SNAPC4	ENSG00000165684.4	ENSG00000165684.4:s:136387485-136387579	-0.188566299545138	0.917879199137441	4.71463136253458e-06	0.817	0.608	s|1e1.1o1|2e1.1o1|i	TRUE	FALSE	FALSE	3	2	1	chr9	-	ENSG00000165684.4:s:136387485-136387579_136384814-136387485	136387485	136387579	136384814	136387485			2671	chr9:136384814-136387485	chr9:136387485-136387579	94	1	source	annotated	FALSE
SNAPC4	ENSG00000165684.4	ENSG00000165684.4:s:136387485-136387579	-0.00761613085985161	0.000924024555163443	0.00932143925192952	0.04	0.023	s|1e1.1o1|2e1.1o1|i	TRUE	FALSE	FALSE	3	2	0	chr9	-	ENSG00000165684.4:s:136387485-136387579_136384815-136387484			136384815	136387484			2669	chr9:136384815-136387484	chr9:NA-NA			source	none	FALSE
ATF5	ENSG00000169136.11	ENSG00000169136.11:t:49930732-49931229	0.102886146859061	0.49363011185181	5.11914884996994e-06	0.547	0.686	t|1e1.1o1|1e2.1o1	FALSE	FALSE	TRUE	2	3	1	chr19	+	ENSG00000169136.11:t:49930732-49931229_49929400-49930732	49929205	49929400	49929400	49930732			1332	chr19:49929400-49930732	chr19:49929205-49929400	195	0	target	annotated	FALSE
ATF5	ENSG00000169136.11	ENSG00000169136.11:t:49930732-49931229	-0.102886184060611	0.493630428397595	5.11940939984523e-06	0.453	0.314	t|1e1.1o1|1e2.1o1	FALSE	FALSE	TRUE	2	3	1	chr19	+	ENSG00000169136.11:t:49930732-49931229_49930432-49930732	49930219	49930432	49930432	49930732			300	chr19:49930432-49930732	chr19:49930219-49930432	213	0	target	annotated	FALSE
LINGO1	ENSG00000169783.12	ENSG00000169783.12:s:77677089-77677174	0.150855175662028	0.915567145312761	6.1843144633779e-09	0.001	0.174	s|1e1.1o1|1e2.1o1	FALSE	FALSE	TRUE	2	3	0	chr15	-	ENSG00000169783.12:s:77677089-77677174_77641025-77677089		77641025	77641025	77677089			36064	chr15:77641025-77677089	chr15:nan-77641025			source	novel_acceptor	TRUE
LINGO1	ENSG00000169783.12	ENSG00000169783.12:s:77677089-77677174	-0.150855213145554	0.915567228386343	6.18468165569652e-09	0.999	0.826	s|1e1.1o1|1e2.1o1	FALSE	FALSE	TRUE	2	3	1	chr15	-	ENSG00000169783.12:s:77677089-77677174_77615900-77677089	77613027	77615900	77615900	77677089			61189	chr15:77615900-77677089	chr15:77613027-77615900	2873	2	source	annotated	FALSE
FAM161A	ENSG00000170264.13	ENSG00000170264.13:s:61842122-61842360	-0.236333627083355	0.988822251954392	7.48562462016267e-08	0.937	0.687	s|1e1.1o3|1e1.2o3	FALSE	TRUE	FALSE	2	2	1	chr2	-	ENSG00000170264.13:s:61842122-61842360_61840581-61842122	61839421	61840581	61840581	61842122			1541	chr2:61840581-61842122	chr2:61839421-61840581	1160	2	source	annotated	FALSE
FAM161A	ENSG00000170264.13	ENSG00000170264.13:s:61842122-61842360	0.236333645726617	0.988822286177055	7.48519690119284e-08	0.063	0.313	s|1e1.1o3|1e1.2o3	FALSE	TRUE	FALSE	2	2	1	chr2	-	ENSG00000170264.13:s:61842122-61842360_61840525-61842122	61842122	61842360	61840525	61842122			1597	chr2:61840525-61842122	chr2:61842122-61842360	238	1	source	annotated	FALSE
ZNF519	ENSG00000175322.11	ENSG00000175322.11:s:14132275-14132490	0.0587386795280895	0.2707405867552	1.02575873090691e-05	0.577	0.693	s|1e1.1o1|1e2.2o2|1e3.1o1	FALSE	FALSE	TRUE	3	4	1	chr18	-	ENSG00000175322.11:s:14132275-14132490_14124476-14132275	14084877	14085076	14124476	14132275			7799	chr18:14124476-14132275	chr18:14084877-14085076	199	1	source	annotated	FALSE
ZNF519	ENSG00000175322.11	ENSG00000175322.11:s:14132275-14132490	-0.110356350662249	0.589371218322293	2.42785415405233e-06	0.161	0.026	s|1e1.1o1|1e2.2o2|1e3.1o1	FALSE	FALSE	TRUE	3	4	1	chr18	-	ENSG00000175322.11:s:14132275-14132490_14106409-14132275	14103863	14106439	14106409	14132275			25866	chr18:14106409-14132275	chr18:14103863-14106439	2576	2	source	annotated	FALSE
ZNF519	ENSG00000175322.11	ENSG00000175322.11:s:14132275-14132490	0.00809950932499094	0.0804568595213584	2.60352839446254e-05	0.263	0.281	s|1e1.1o1|1e2.2o2|1e3.1o1	FALSE	FALSE	TRUE	3	4	1	chr18	-	ENSG00000175322.11:s:14132275-14132490_14085076-14132275	14124046	14124476	14085076	14132275			47199	chr18:14085076-14132275	chr18:14124046-14124476	430	1	source	annotated	FALSE
MTHFR	ENSG00000177000.12	ENSG00000177000.12:s:11791207-11791326	0.109701584230701	0.577370950078424	3.3594260197919e-05	0.659	0.781	s|1e1.1o2|1e1.2o2|i	FALSE	TRUE	FALSE	3	2	1	chr1	-	ENSG00000177000.12:s:11791207-11791326_11790898-11791207	11785723	11790898	11790898	11791207	11790899	11791206	309	chr1:11790898-11791207	chr1:11785723-11790898	5175	0	source	annotated	FALSE
MTHFR	ENSG00000177000.12	ENSG00000177000.12:s:11791207-11791326	-0.0595657463198263	0.0931796045716483	0.000462446304801079	0.091	0.009	s|1e1.1o2|1e1.2o2|i	FALSE	TRUE	FALSE	3	2	1	chr1	-	ENSG00000177000.12:s:11791207-11791326_11790716-11791207	11791207	11791326	11790716	11791207			491	chr1:11790716-11791207	chr1:11791207-11791326	119	2	source	annotated	FALSE
MTHFR	ENSG00000177000.12	ENSG00000177000.12:s:11791207-11791326	-0.0246646545861108	0.0506008779409287	0.000417021729385514	0.253	0.21	s|1e1.1o2|1e1.2o2|i	FALSE	TRUE	FALSE	3	2	0	chr1	-	ENSG00000177000.12:s:11791207-11791326_11790899-11791206			11790899	11791206			307	chr1:11790899-11791206	chr1:NA-NA			source	none	FALSE
MTHFR	ENSG00000177000.12	ENSG00000177000.12:s:11805888-11806920	0.123031358025189	0.612274219971184	3.34929104627605e-05	0.39	0.546	s|1e1.2o3|1e1.3o3|i	FALSE	TRUE	FALSE	3	2	1	chr1	-	ENSG00000177000.12:s:11805888-11806920_11803129-11805888	11802881	11803383	11803129	11805888	11805414	11805887	2759	chr1:11803129-11805888	chr1:11802881-11803383	502	1	source	annotated	FALSE
MTHFR	ENSG00000177000.12	ENSG00000177000.12:s:11805888-11806920	-0.0866025771222396	0.395751210947681	5.08490293432695e-05	0.128	0.026	s|1e1.2o3|1e1.3o3|i	FALSE	TRUE	FALSE	3	2	1	chr1	-	ENSG00000177000.12:s:11805888-11806920_11803126-11805888	11805888	11806920	11803126	11805888			2762	chr1:11803126-11805888	chr1:11805888-11806920	1032	0	source	annotated	FALSE
MTHFR	ENSG00000177000.12	ENSG00000177000.12:s:11805888-11806920	-0.0287126726613632	0.114617214500531	0.000209368218174633	0.482	0.428	s|1e1.2o3|1e1.3o3|i	FALSE	TRUE	FALSE	3	2	1	chr1	-	ENSG00000177000.12:s:11805888-11806920_11805414-11805887			11805414	11805887			473	chr1:11805414-11805887	chr1:NA-NA			source	none	FALSE
MTHFR	ENSG00000177000.12	ENSG00000177000.12:t:11802881-11803383	0.207961889429974	0.915436185002088	9.11569350391609e-07	0.457	0.692	t|1e1.1o1|1e2.2o2|1e3.1o1|2e4.1o1|2e5.1o1	FALSE	TRUE	TRUE	5	6	1	chr1	-	ENSG00000177000.12:t:11802881-11803383_11803129-11805888	11802881	11803383	11803129	11805888			2759	chr1:11803129-11805888	chr1:11802881-11803383	502	1	target	annotated	FALSE
MTHFR	ENSG00000177000.12	ENSG00000177000.12:t:11802881-11803383	0.00166760062280459	0.0126105393472	0.000108454199586716	0.107	0.111	t|1e1.1o1|1e2.2o2|1e3.1o1|2e4.1o1|2e5.1o1	FALSE	TRUE	TRUE	5	6	1	chr1	-	ENSG00000177000.12:t:11802881-11803383_11803129-11805347	11803405	11803677	11803129	11805347			2218	chr1:11803129-11805347	chr1:11803405-11803677	272	2	target	annotated	FALSE
MTHFR	ENSG00000177000.12	ENSG00000177000.12:t:11802881-11803383	-0.0693371961454631	0.29842896625069	8.38776778055994e-06	0.255	0.151	t|1e1.1o1|1e2.2o2|1e3.1o1|2e4.1o1|2e5.1o1	FALSE	TRUE	TRUE	5	6	1	chr1	-	ENSG00000177000.12:t:11802881-11803383_11803129-11803405	11805347	11805413	11803129	11803405			276	chr1:11803129-11803405	chr1:11805347-11805413	66	0	target	annotated	FALSE
MTHFR	ENSG00000177000.12	ENSG00000177000.12:t:11802881-11803383	-0.101532830167124	0.520002657133565	2.98754135852342e-06	0.148	0.032	t|1e1.1o1|1e2.2o2|1e3.1o1|2e4.1o1|2e5.1o1	FALSE	TRUE	TRUE	5	6	1	chr1	-	ENSG00000177000.12:t:11802881-11803383_11803126-11805888	11805888	11806920	11803126	11805888			2762	chr1:11803126-11805888	chr1:11805888-11806920	1032	0	target	annotated	FALSE
MTHFR	ENSG00000177000.12	ENSG00000177000.12:t:11802881-11803383	-0.0018300787200066	4.34660494843858e-05	0.00393302704464615	0.03	0.012	t|1e1.1o1|1e2.2o2|1e3.1o1|2e4.1o1|2e5.1o1	FALSE	TRUE	TRUE	5	6	1	chr1	-	ENSG00000177000.12:t:11802881-11803383_11803126-11803405			11803126	11803405			279	chr1:11803126-11803405	chr1:NA-NA			target	annotated	FALSE
SLC8A1	ENSG00000183023.18	ENSG00000183023.18:t:40174825-40174842	-0.121339990375689	0.574695470796676	4.28867934110233e-06	0.884	0.712	t|1e1.1o1|1e2.1o1|1e3.1o1	FALSE	FALSE	TRUE	3	4	0	chr2	-	ENSG00000183023.18:t:40174825-40174842_40174842-40178387	40174825	40174842	40174842	40178387			3545	chr2:40174842-40178387	chr2:40174825-40174842	17	2	target	novel_exon_skip	FALSE
SLC8A1	ENSG00000183023.18	ENSG00000183023.18:t:40174825-40174842	-0.00942010931434833	0.0036724904282606	0.000201863225141374	0.045	0.007	t|1e1.1o1|1e2.1o1|1e3.1o1	FALSE	FALSE	TRUE	3	4	1	chr2	-	ENSG00000183023.18:t:40174825-40174842_40174842-40177752	40175261	40175281	40174842	40177752			2910	chr2:40174842-40177752	chr2:40175261-40175281	20	2	target	annotated	FALSE
SLC8A1	ENSG00000183023.18	ENSG00000183023.18:t:40174825-40174842	0.173954002073243	0.811027653714473	1.81493628178482e-06	0.071	0.282	t|1e1.1o1|1e2.1o1|1e3.1o1	FALSE	FALSE	TRUE	3	4	1	chr2	-	ENSG00000183023.18:t:40174825-40174842_40174842-40175261	40177752	40177855	40174842	40175261			419	chr2:40174842-40175261	chr2:40177752-40177855	103	1	target	annotated	FALSE
NR2C2AP	ENSG00000184162.14	ENSG00000184162.14:s:19202791-19202881	0.130759279793906	0.670549797202729	2.67751140067842e-06	0.494	0.642	s|1e1.1o1|1e2.1o1	FALSE	FALSE	TRUE	2	3	1	chr19	-	ENSG00000184162.14:s:19202791-19202881_19202575-19202791	19202058	19202398	19202575	19202791			216	chr19:19202575-19202791	chr19:19202058-19202398	340	1	source	annotated	FALSE
NR2C2AP	ENSG00000184162.14	ENSG00000184162.14:s:19202791-19202881	-0.130759306418042	0.670550098418174	2.67765412087506e-06	0.506	0.358	s|1e1.1o1|1e2.1o1	FALSE	FALSE	TRUE	2	3	1	chr19	-	ENSG00000184162.14:s:19202791-19202881_19202398-19202791	19202470	19202575	19202398	19202791			393	chr19:19202398-19202791	chr19:19202470-19202575	105	0	source	annotated	FALSE
SEMA4D	ENSG00000187764.11	ENSG00000187764.11:s:89495567-na	0.485121267069465	0.99999697514635	2.26188445280372e-09	0.131	0.608	s|1e1.1o1|1e2.1o1	FALSE	FALSE	TRUE	2	3	0	chr9	-	ENSG00000187764.11:s:89495567-na_89475550-89495567	89455888	89455953	89475550	89495567			20017	chr9:89475550-89495567	chr9:89455888-89455953	65	2	source	none	FALSE
SEMA4D	ENSG00000187764.11	ENSG00000187764.11:s:89495567-na	-0.485121262618352	0.999996981414804	2.24102825185923e-09	0.869	0.392	s|1e1.1o1|1e2.1o1	FALSE	FALSE	TRUE	2	3	0	chr9	-	ENSG00000187764.11:s:89495567-na_89455953-89495567	89475485	89475550	89455953	89495567			39614	chr9:89455953-89495567	chr9:89475485-89475550	65	2	source	novel_donor	FALSE
SEMA4D	ENSG00000187764.11	ENSG00000187764.11:s:89497919-89498130	0.408134210688214	0.999999039577287	6.441525129491e-11	0.075	0.48	s|1e1.1o1|1e2.1o1	FALSE	FALSE	TRUE	2	3	0	chr9	-	ENSG00000187764.11:s:89497919-89498130_89475550-89497919	89455888	89455953	89475550	89497919			22369	chr9:89475550-89497919	chr9:89455888-89455953	65	2	source	novel_acceptor	FALSE
SEMA4D	ENSG00000187764.11	ENSG00000187764.11:s:89497919-89498130	-0.408134186153705	0.999999041659085	6.3951732798273e-11	0.925	0.52	s|1e1.1o1|1e2.1o1	FALSE	FALSE	TRUE	2	3	1	chr9	-	ENSG00000187764.11:s:89497919-89498130_89455953-89497919	89475485	89475550	89455953	89497919			41966	chr9:89455953-89497919	chr9:89475485-89475550	65	2	source	annotated	FALSE
SEMA4D	ENSG00000187764.11	ENSG00000187764.11:t:89405351-89405699	-0.149549265762999	0.798500429081772	1.3931604125883e-06	0.457	0.292	t|1e1.1o1|1e2.1o1	FALSE	FALSE	TRUE	2	3	1	chr9	-	ENSG00000187764.11:t:89405351-89405699_89405699-89455888	89405351	89405699	89405699	89455888			50189	chr9:89405699-89455888	chr9:89405351-89405699	348	0	target	annotated	FALSE
SEMA4D	ENSG00000187764.11	ENSG00000187764.11:t:89405351-89405699	0.149549279576273	0.798500422060879	1.39308850582415e-06	0.543	0.708	t|1e1.1o1|1e2.1o1	FALSE	FALSE	TRUE	2	3	1	chr9	-	ENSG00000187764.11:t:89405351-89405699_89405699-89418056	89418056	89418233	89405699	89418056			12357	chr9:89405699-89418056	chr9:89418056-89418233	177	0	target	annotated	FALSE
SEMA4D	ENSG00000187764.11	ENSG00000187764.11:t:89418056-89418233	-0.198843624554899	0.963926598632908	1.65516376271491e-07	0.867	0.661	t|1e1.1o1|1e2.1o1	FALSE	FALSE	TRUE	2	3	1	chr9	-	ENSG00000187764.11:t:89418056-89418233_89418118-89455888	89418056	89418233	89418118	89455888			37770	chr9:89418118-89455888	chr9:89418056-89418233	177	0	target	annotated	FALSE
SEMA4D	ENSG00000187764.11	ENSG00000187764.11:t:89418056-89418233	0.198843682121613	0.963926715107277	1.65508614244703e-07	0.133	0.339	t|1e1.1o1|1e2.1o1	FALSE	FALSE	TRUE	2	3	1	chr9	-	ENSG00000187764.11:t:89418056-89418233_89418118-89418363	89418363	89418833	89418118	89418363			245	chr9:89418118-89418363	chr9:89418363-89418833	470	2	target	annotated	FALSE
SEMA4D	ENSG00000187764.11	ENSG00000187764.11:t:89455888-89455953	-0.154004280266742	0.827125068703105	1.07580281416553e-06	0.443	0.271	t|1e1.1o1|1e2.1o1|1e3.1o1|1e4.1o1|1e5.1o1	FALSE	FALSE	TRUE	5	6	1	chr9	-	ENSG00000187764.11:t:89455888-89455953_89455953-89497919	89455888	89455953	89455953	89497919			41966	chr9:89455953-89497919	chr9:89455888-89455953	65	2	target	annotated	FALSE
SEMA4D	ENSG00000187764.11	ENSG00000187764.11:t:89455888-89455953	-0.279382986752568	0.99990611626555	1.32153732401719e-10	0.394	0.111	t|1e1.1o1|1e2.1o1|1e3.1o1|1e4.1o1|1e5.1o1	FALSE	FALSE	TRUE	5	6	0	chr9	-	ENSG00000187764.11:t:89455888-89455953_89455953-89495567	89474539	89474623	89455953	89495567			39614	chr9:89455953-89495567	chr9:89474539-89474623	84	0	target	novel_donor	FALSE
SEMA4D	ENSG00000187764.11	ENSG00000187764.11:t:89455888-89455953	-7.83410956897357e-05	4.83578845065384e-09	0.346509192554494	0.02	0.005	t|1e1.1o1|1e2.1o1|1e3.1o1|1e4.1o1|1e5.1o1	FALSE	FALSE	TRUE	5	6	1	chr9	-	ENSG00000187764.11:t:89455888-89455953_89455953-89479572	89475485	89475550	89455953	89479572			23619	chr9:89455953-89479572	chr9:89475485-89475550	65	2	target	annotated	FALSE
SEMA4D	ENSG00000187764.11	ENSG00000187764.11:t:89455888-89455953	0.195399185561691	0.97925332144776	1.52918417209803e-08	0.042	0.237	t|1e1.1o1|1e2.1o1|1e3.1o1|1e4.1o1|1e5.1o1	FALSE	FALSE	TRUE	5	6	0	chr9	-	ENSG00000187764.11:t:89455888-89455953_89455953-89475485	89479572	89479890	89455953	89475485			19532	chr9:89455953-89475485	chr9:89479572-89479890	318	0	target	novel_donor	TRUE
SEMA4D	ENSG00000187764.11	ENSG00000187764.11:t:89455888-89455953	0.265852854744819	0.999716225354904	3.85871080772642e-10	0.103	0.373	t|1e1.1o1|1e2.1o1|1e3.1o1|1e4.1o1|1e5.1o1	FALSE	FALSE	TRUE	5	6	0	chr9	-	ENSG00000187764.11:t:89455888-89455953_89455953-89474539	89495567		89455953	89474539			18586	chr9:89455953-89474539	chr9:89495567-nan			target	novel_donor	FALSE
ZNF777	ENSG00000196453.8	ENSG00000196453.8:t:149455177-149456037	0.132501179427478	0.645607407886621	3.32583091203247e-06	0.397	0.562	t|1e1.1o1|1e2.1o1	FALSE	FALSE	TRUE	2	3	1	chr7	-	ENSG00000196453.8:t:149455177-149456037_149456037-149460815	149455177	149456037	149456037	149460815			4778	chr7:149456037-149460815	chr7:149455177-149456037	860	2	target	annotated	FALSE
ZNF777	ENSG00000196453.8	ENSG00000196453.8:t:149455177-149456037	-0.13250121579071	0.645607681717842	3.32600012953321e-06	0.603	0.438	t|1e1.1o1|1e2.1o1	FALSE	FALSE	TRUE	2	3	0	chr7	-	ENSG00000196453.8:t:149455177-149456037_149456037-149460030	149460030		149456037	149460030			3993	chr7:149456037-149460030	chr7:149460030-nan			target	novel_donor	FALSE
SCN8A	ENSG00000196876.16	ENSG00000196876.16:s:51687091-51687219	-0.201855511114449	0.843484357444822	1.94673454412264e-06	0.578	0.33	s|1e1.1o1|1e2.1o1	FALSE	FALSE	TRUE	2	3	1	chr12	+	ENSG00000196876.16:s:51687091-51687219_51687219-51688758	51687091	51687219	51687219	51688758			1539	chr12:51687219-51688758	chr12:51687091-51687219	128	2	source	annotated	FALSE
SCN8A	ENSG00000196876.16	ENSG00000196876.16:s:51687091-51687219	0.20185549170127	0.843484273112546	1.94664436679339e-06	0.422	0.67	s|1e1.1o1|1e2.1o1	FALSE	FALSE	TRUE	2	3	1	chr12	+	ENSG00000196876.16:s:51687091-51687219_51687219-51689005	51688758	51688849	51687219	51689005			1786	chr12:51687219-51689005	chr12:51688758-51688849	91	1	source	annotated	FALSE
SCN8A	ENSG00000196876.16	ENSG00000196876.16:t:51786542-51786826	0.000140009530267655	0.0698751758682266	2.84991683250357e-05	0.415	0.416	t|1e1.1o1|1e2.1o1|1e3.1o1	FALSE	FALSE	TRUE	3	4	1	chr12	+	ENSG00000196876.16:t:51786542-51786826_51774362-51786542	51774189	51774362	51774362	51786542			12180	chr12:51774362-51786542	chr12:51774189-51774362	173	2	target	annotated	FALSE
SCN8A	ENSG00000196876.16	ENSG00000196876.16:t:51786542-51786826	0.160595005073357	0.74041193087262	2.66082028983658e-06	0.313	0.52	t|1e1.1o1|1e2.1o1|1e3.1o1	FALSE	FALSE	TRUE	3	4	1	chr12	+	ENSG00000196876.16:t:51786542-51786826_51780271-51786542	51780202	51780271	51780271	51786542			6271	chr12:51780271-51786542	chr12:51780202-51780271	69	0	target	annotated	FALSE
SCN8A	ENSG00000196876.16	ENSG00000196876.16:t:51786542-51786826	-0.190691906322822	0.927078841839279	5.53194277053137e-07	0.271	0.063	t|1e1.1o1|1e2.1o1|1e3.1o1	FALSE	FALSE	TRUE	3	4	1	chr12	+	ENSG00000196876.16:t:51786542-51786826_51780771-51786542	51780649	51780771	51780771	51786542			5771	chr12:51780771-51786542	chr12:51780649-51780771	122	2	target	annotated	FALSE
ZNF81	ENSG00000197779.13	ENSG00000197779.13:s:47895845-47895940	0.199124736717803	0.886157070729295	1.18924867102156e-06	0.717	0.949	s|1e1.1o1|1e2.1o1	FALSE	FALSE	TRUE	2	3	1	chrX	+	ENSG00000197779.13:s:47895845-47895940_47895940-47914924	47895845	47895940	47895940	47914924			18984	chrX:47895940-47914924	chrX:47895845-47895940	95	2	source	annotated	FALSE
ZNF81	ENSG00000197779.13	ENSG00000197779.13:s:47895845-47895940	-0.199124766050246	0.886157142855715	1.18930424020114e-06	0.283	0.051	s|1e1.1o1|1e2.1o1	FALSE	FALSE	TRUE	2	3	1	chrX	+	ENSG00000197779.13:s:47895845-47895940_47895940-48002528	47914924	47922256	47895940	48002528			106588	chrX:47895940-48002528	chrX:47914924-47922256	7332	0	source	annotated	FALSE
CD27-AS1	ENSG00000215039.7	ENSG00000215039.7:t:6446961-6447087	-0.0544944697774	0.251685943408599	0.000107714004993542	0.471	0.363	t|1e1.1o4|2e1.2o4|i	TRUE	TRUE	FALSE	3	2	1	chr12	-	ENSG00000215039.7:t:6446961-6447087_6447087-6448037	6446961	6447087	6447087	6448037	6447088	6447615	950	chr12:6447087-6448037	chr12:6446961-6447087	126	0	target	annotated	FALSE
CD27-AS1	ENSG00000215039.7	ENSG00000215039.7:t:6446961-6447087	-0.0597646630062942	0.229272827619331	0.000109420842115071	0.126	0.04	t|1e1.1o4|2e1.2o4|i	TRUE	TRUE	FALSE	3	2	0	chr12	-	ENSG00000215039.7:t:6446961-6447087_6447085-6448006	6447773	6448150	6447085	6448006			921	chr12:6447085-6448006	chr12:6447773-6448150	377	2	target	none	FALSE
CD27-AS1	ENSG00000215039.7	ENSG00000215039.7:t:6446961-6447087	0.139346680835098	0.651356669707259	3.12215562054043e-05	0.401	0.596	t|1e1.1o4|2e1.2o4|i	TRUE	TRUE	FALSE	3	2	1	chr12	-	ENSG00000215039.7:t:6446961-6447087_6447088-6447615			6447088	6447615			527	chr12:6447088-6447615	chr12:NA-NA			target	none	FALSE
FADS3	ENSG00000221968.9	ENSG00000221968.9:s:61876866-61876871	-0.116642856212808	0.572404948179331	3.85469155215201e-05	0.521	0.374	s|1e1.1o1|i	FALSE	FALSE	FALSE	2	2	1	chr11	-	ENSG00000221968.9:s:61876866-61876871_61876455-61876866	61876359	61876455	61876455	61876866	61876456	61876865	411	chr11:61876455-61876866	chr11:61876359-61876455	96	0	source	annotated	FALSE
FADS3	ENSG00000221968.9	ENSG00000221968.9:s:61876866-61876871	0.116642800582271	0.572404497484845	3.85440568899254e-05	0.479	0.626	s|1e1.1o1|i	FALSE	FALSE	FALSE	2	2	1	chr11	-	ENSG00000221968.9:s:61876866-61876871_61876456-61876865	61876866	61876871	61876456	61876865			409	chr11:61876456-61876865	chr11:61876866-61876871	5	2	source	none	FALSE
FADS3	ENSG00000221968.9	ENSG00000221968.9:s:61879312-61879509	-0.233220066771164	0.992263488657363	1.66200020190743e-07	0.937	0.69	s|1e1.1o1|i	FALSE	FALSE	FALSE	2	2	1	chr11	-	ENSG00000221968.9:s:61879312-61879509_61878847-61879312	61878641	61878847	61878847	61879312	61878848	61879311	465	chr11:61878847-61879312	chr11:61878641-61878847	206	2	source	annotated	FALSE
FADS3	ENSG00000221968.9	ENSG00000221968.9:s:61879312-61879509	0.233220100830921	0.992263461877121	1.66187161633581e-07	0.063	0.31	s|1e1.1o1|i	FALSE	FALSE	FALSE	2	2	0	chr11	-	ENSG00000221968.9:s:61879312-61879509_61878848-61879311	61879312	61879509	61878848	61879311			463	chr11:61878848-61879311	chr11:61879312-61879509	197	2	source	none	FALSE
AL390198.1	ENSG00000226465.3	ENSG00000226465.3:t:25752563-25752776	0.104331224565605	0.506685466791948	4.6936395681974e-06	0.779	0.922	t|1e1.1o1|1e2.1o2	FALSE	FALSE	TRUE	2	3	1	chr20	+	ENSG00000226465.3:t:25752563-25752776_25734895-25752563	25734269	25734895	25734895	25752563			17668	chr20:25734895-25752563	chr20:25734269-25734895	626	2	target	annotated	FALSE
AL390198.1	ENSG00000226465.3	ENSG00000226465.3:t:25752563-25752776	-0.104331248751401	0.506685758767203	4.69389289425859e-06	0.221	0.078	t|1e1.1o1|1e2.1o2	FALSE	FALSE	TRUE	2	3	1	chr20	+	ENSG00000226465.3:t:25752563-25752776_25751338-25752563	25751040	25752073	25751338	25752563			1225	chr20:25751338-25752563	chr20:25751040-25752073	1033	1	target	annotated	FALSE
MAP4K3-DT	ENSG00000231312.7	ENSG00000231312.7:s:39454297-39454726	0.196262288660784	0.888535673040767	1.14165991953858e-06	0.431	0.652	s|1e1.1o1|1e2.1o1	FALSE	FALSE	TRUE	2	3	1	chr2	+	ENSG00000231312.7:s:39454297-39454726_39454365-39474527	39454297	39454726	39454365	39474527			20162	chr2:39454365-39474527	chr2:39454297-39454726	429	0	source	annotated	FALSE
MAP4K3-DT	ENSG00000231312.7	ENSG00000231312.7:s:39454297-39454726	-0.196262287963174	0.888535760644365	1.14171338383429e-06	0.569	0.348	s|1e1.1o1|1e2.1o1	FALSE	FALSE	TRUE	2	3	1	chr2	+	ENSG00000231312.7:s:39454297-39454726_39454365-39516414	39474527	39475339	39454365	39516414			62049	chr2:39454365-39516414	chr2:39474527-39475339	812	2	source	annotated	FALSE
ZNF37BP	ENSG00000234420.7	ENSG00000234420.7:s:42523612-42523738	0.164469592855216	0.850012998387114	9.49767398767751e-07	0.066	0.25	s|1e1.1o2|1e1.2o2	FALSE	TRUE	FALSE	2	2	0	chr10	-	ENSG00000234420.7:s:42523612-42523738_42523324-42523612	42523182	42523324	42523324	42523612			288	chr10:42523324-42523612	chr10:42523182-42523324	142	1	source	novel_acceptor	FALSE
ZNF37BP	ENSG00000234420.7	ENSG00000234420.7:s:42523612-42523738	-0.164469565455058	0.850013049747227	9.49815736062121e-07	0.934	0.75	s|1e1.1o2|1e1.2o2	FALSE	TRUE	FALSE	2	2	1	chr10	-	ENSG00000234420.7:s:42523612-42523738_42523305-42523612	42523612	42523738	42523305	42523612			307	chr10:42523305-42523612	chr10:42523612-42523738	126	0	source	annotated	FALSE
FAM200B	ENSG00000237765.7	ENSG00000237765.7:s:15686236-15686606	-0.122730517878464	0.670721931016301	2.21535680979823e-05	0.273	0.142	s|1e1.2o2|i	FALSE	FALSE	FALSE	2	2	1	chr4	+	ENSG00000237765.7:s:15686236-15686606_15686462-15687001	15686236	15686606	15686462	15687001	15686607	15686931	539	chr4:15686462-15687001	chr4:15686236-15686606	370	1	source	annotated	FALSE
FAM200B	ENSG00000237765.7	ENSG00000237765.7:s:15686236-15686606	0.122730463610498	0.670721321611041	2.21518190063559e-05	0.727	0.858	s|1e1.2o2|i	FALSE	FALSE	FALSE	2	2	1	chr4	+	ENSG00000237765.7:s:15686236-15686606_15686607-15686931	15686932	15687462	15686607	15686931			324	chr4:15686607-15686931	chr4:15686932-15687462	530	2	source	none	FALSE
MRPL33	ENSG00000243147.8	ENSG00000243147.8:s:27772674-27772855	0.121414975891126	0.640320774495477	3.23554031966682e-05	0.2	0.35	s|1e1.1o1|1e2.1o1|1e3.1o1|i	FALSE	FALSE	TRUE	4	4	1	chr2	+	ENSG00000243147.8:s:27772674-27772855_27772692-27774424	27772674	27772855	27772692	27774424	27772856	27774423	1732	chr2:27772692-27774424	chr2:27772674-27772855	181	1	source	annotated	FALSE
MRPL33	ENSG00000243147.8	ENSG00000243147.8:s:27772674-27772855	-0.113658719750728	0.60417451561784	3.67926114420714e-05	0.783	0.639	s|1e1.1o1|1e2.1o1|1e3.1o1|i	FALSE	FALSE	TRUE	4	4	1	chr2	+	ENSG00000243147.8:s:27772674-27772855_27772692-27779433	27774424	27774530	27772692	27779433			6741	chr2:27772692-27779433	chr2:27774424-27774530	106	1	source	annotated	FALSE
MRPL33	ENSG00000243147.8	ENSG00000243147.8:s:27772674-27772855	7.77155985295739e-16	7.29950855916768e-21	0.999999999007135	0.005	0.001	s|1e1.1o1|1e2.1o1|1e3.1o1|i	FALSE	FALSE	TRUE	4	4	1	chr2	+	ENSG00000243147.8:s:27772674-27772855_27772692-27782572	27779433	27779734	27772692	27782572			9880	chr2:27772692-27782572	chr2:27779433-27779734	301	1	source	annotated	FALSE
MRPL33	ENSG00000243147.8	ENSG00000243147.8:s:27772674-27772855	-1.6610237686708e-10	7.29950866174223e-21	0.947688423727824	0.01	0.008	s|1e1.1o1|1e2.1o1|1e3.1o1|i	FALSE	FALSE	TRUE	4	4	0	chr2	+	ENSG00000243147.8:s:27772674-27772855_27772856-27774423	27782572	27782694	27772856	27774423			1567	chr2:27772856-27774423	chr2:27782572-27782694	122	2	source	none	FALSE
AL691442.1	ENSG00000251246.1	ENSG00000251246.1:s:na-155075907	0.600546172988649	0.999999999990591	1.68498439674148e-12	0.12	0.71	s|1e1.1o1|1e2.1o1	FALSE	FALSE	TRUE	2	3	0	chr1	+	ENSG00000251246.1:s:na-155075907_155075907-155076136		155075907	155075907	155076136			229	chr1:155075907-155076136	chr1:nan-155075907			source	none	FALSE
AL691442.1	ENSG00000251246.1	ENSG00000251246.1:s:na-155075907	-0.600546164330504	0.999999999987056	4.29356550313287e-12	0.88	0.29	s|1e1.1o1|1e2.1o1	FALSE	FALSE	TRUE	2	3	0	chr1	+	ENSG00000251246.1:s:na-155075907_155075907-155085091	155076136	155076174	155075907	155085091			9184	chr1:155075907-155085091	chr1:155076136-155076174	38	2	source	ambig_gene	FALSE
AL691442.1	ENSG00000251246.1	ENSG00000251246.1:t:155085091-155085404	-0.385646284560942	0.999999370674314	1.2168599461404e-11	0.522	0.138	t|1e1.1o1|1e2.1o1	FALSE	FALSE	TRUE	2	3	0	chr1	+	ENSG00000251246.1:t:155085091-155085404_155075907-155085091		155075907	155075907	155085091			9184	chr1:155075907-155085091	chr1:nan-155075907			target	ambig_gene	FALSE
AL691442.1	ENSG00000251246.1	ENSG00000251246.1:t:155085091-155085404	0.385646305975188	0.999999374729175	1.15343965915809e-11	0.478	0.862	t|1e1.1o1|1e2.1o1	FALSE	FALSE	TRUE	2	3	0	chr1	+	ENSG00000251246.1:t:155085091-155085404_155076174-155085091	155076136	155076174	155076174	155085091			8917	chr1:155076174-155085091	chr1:155076136-155076174	38	2	target	ambig_gene	FALSE
ATP6V1G2-DDX39B	ENSG00000254870.5	ENSG00000254870.5:s:31541950-31542148	-0.107294756685945	0.569476789715768	2.97860388551729e-05	0.54	0.428	s|1e1.1o3|1e1.2o3|1e1.3o3|i	FALSE	TRUE	FALSE	4	2	1	chr6	-	ENSG00000254870.5:s:31541950-31542148_31540664-31541950	31540322	31540664	31540664	31541950	31540665	31541949	1286	chr6:31540664-31541950	chr6:31540322-31540664	342	0	source	annotated	FALSE
ATP6V1G2-DDX39B	ENSG00000254870.5	ENSG00000254870.5:s:31541950-31542148	0.105314145785621	0.558035595280965	3.32973027741221e-05	0.341	0.454	s|1e1.1o3|1e1.2o3|1e1.3o3|i	FALSE	TRUE	FALSE	4	2	1	chr6	-	ENSG00000254870.5:s:31541950-31542148_31540534-31541950	31541950	31542148	31540534	31541950			1416	chr6:31540534-31541950	chr6:31541950-31542148	198	0	source	annotated	FALSE
ATP6V1G2-DDX39B	ENSG00000254870.5	ENSG00000254870.5:s:31541950-31542148	2.30027034361141e-05	7.30570710919151e-21	0.475034240925425	0.012	0.029	s|1e1.1o3|1e1.2o3|1e1.3o3|i	FALSE	TRUE	FALSE	4	2	0	chr6	-	ENSG00000254870.5:s:31541950-31542148_31540401-31541950			31540401	31541950			1549	chr6:31540401-31541950	chr6:NA-NA			source	ambig_gene	FALSE
ATP6V1G2-DDX39B	ENSG00000254870.5	ENSG00000254870.5:s:31541950-31542148	-0.00733286073075382	0.00112901813566323	0.00713747116711461	0.091	0.077	s|1e1.1o3|1e1.2o3|1e1.3o3|i	FALSE	TRUE	FALSE	4	2	0	chr6	-	ENSG00000254870.5:s:31541950-31542148_31540665-31541949			31540665	31541949			1284	chr6:31540665-31541949	chr6:NA-NA			source	none	FALSE
ADNP-AS1	ENSG00000259456.4	ENSG00000259456.4:t:50944357-50945148	0.131781749027801	0.603641873062838	4.24416810584742e-06	0.246	0.435	t|1e1.1o1|1e2.1o1	FALSE	FALSE	TRUE	2	3	1	chr20	+	ENSG00000259456.4:t:50944357-50945148_50931449-50944357	50931372	50931449	50931449	50944357			12908	chr20:50931449-50944357	chr20:50931372-50931449	77	2	target	annotated	FALSE
ADNP-AS1	ENSG00000259456.4	ENSG00000259456.4:t:50944357-50945148	-0.131781790158531	0.603642243424627	4.24436891899305e-06	0.754	0.565	t|1e1.1o1|1e2.1o1	FALSE	FALSE	TRUE	2	3	1	chr20	+	ENSG00000259456.4:t:50944357-50945148_50933827-50944357	50933720	50933827	50933827	50944357			10530	chr20:50933827-50944357	chr20:50933720-50933827	107	2	target	annotated	FALSE
KPNA2P3	ENSG00000266820.1	ENSG00000266820.1:s:64751807-64751956	-0.00968945137752426	0.0254909140320867	0.000668279429237417	0.167	0.145	s|1e1.1o1|1e2.1o1|i	FALSE	FALSE	TRUE	3	3	0	chr17	-	ENSG00000266820.1:s:64751807-64751956_64751601-64751807		64751148	64751601	64751807	64750009	64751806	206	chr17:64751601-64751807	chr17:nan-64751148			source	ambig_gene	FALSE
KPNA2P3	ENSG00000266820.1	ENSG00000266820.1:s:64751807-64751956	0.106201327985306	0.53684438020961	4.16101018097148e-05	0.119	0.256	s|1e1.1o1|1e2.1o1|i	FALSE	FALSE	TRUE	3	3	0	chr17	-	ENSG00000266820.1:s:64751807-64751956_64751148-64751807		64751601	64751148	64751807			659	chr17:64751148-64751807	chr17:nan-64751601			source	ambig_gene	FALSE
KPNA2P3	ENSG00000266820.1	ENSG00000266820.1:s:64751807-64751956	-0.0698945256526356	0.319785723568262	8.4043262456035e-05	0.713	0.595	s|1e1.1o1|1e2.1o1|i	FALSE	FALSE	TRUE	3	3	0	chr17	-	ENSG00000266820.1:s:64751807-64751956_64750009-64751806	64751807	64751956	64750009	64751806			1797	chr17:64750009-64751806	chr17:64751807-64751956	149	2	source	none	FALSE
TAF9	ENSG00000273841.5	ENSG00000273841.5:s:69368627-69369316	-0.0737439637666093	0.310711514664445	8.56469028205353e-05	0.235	0.141	s|1e1.2o2|2e1.2o2|3e1.2o2|i	TRUE	FALSE	FALSE	4	2	1	chr5	-	ENSG00000273841.5:s:69368627-69369316_69366595-69369165	69366503	69366821	69366595	69369165	69367910	69368626	2570	chr5:69366595-69369165	chr5:69366503-69366821	318	0	source	annotated	FALSE
TAF9	ENSG00000273841.5	ENSG00000273841.5:s:69368627-69369316	-0.0839130387683313	0.383437321748467	6.88914538284902e-05	0.265	0.159	s|1e1.2o2|2e1.2o2|3e1.2o2|i	TRUE	FALSE	FALSE	4	2	1	chr5	-	ENSG00000273841.5:s:69368627-69369316_69366595-69368825	69368627	69369316	69366595	69368825			2230	chr5:69366595-69368825	chr5:69368627-69369316	689	2	source	annotated	FALSE
TAF9	ENSG00000273841.5	ENSG00000273841.5:s:69368627-69369316	0.18915724515344	0.938060306649201	2.89875662186284e-06	0.399	0.6	s|1e1.2o2|2e1.2o2|3e1.2o2|i	TRUE	FALSE	FALSE	4	2	0	chr5	-	ENSG00000273841.5:s:69368627-69369316_69366595-69368627			69366595	69368627			2032	chr5:69366595-69368627	chr5:NA-NA			source	ambig_gene	FALSE
TAF9	ENSG00000273841.5	ENSG00000273841.5:s:69368627-69369316	-0.00224630791434468	0.00166762572633163	0.00762362804482586	0.105	0.101	s|1e1.2o2|2e1.2o2|3e1.2o2|i	TRUE	FALSE	FALSE	4	2	0	chr5	-	ENSG00000273841.5:s:69368627-69369316_69367910-69368626			69367910	69368626			716	chr5:69367910-69368626	chr5:NA-NA			source	none	FALSE
AC004706.3	ENSG00000282936.2	ENSG00000282936.2:s:6635898-6640456	0.204022615262135	0.957097832196249	2.53744177236609e-07	0.025	0.252	s|1e1.1o1|2e1.1o1	TRUE	FALSE	FALSE	2	2	0	chr17	-	ENSG00000282936.2:s:6635898-6640456_6635171-6637646	6635011	6635171	6635171	6637646			2475	chr17:6635171-6637646	chr17:6635011-6635171	160	1	source	ambig_gene	TRUE
AC004706.3	ENSG00000282936.2	ENSG00000282936.2:s:6635898-6640456	-0.204022617176027	0.95709786109961	2.5375495382729e-07	0.975	0.748	s|1e1.1o1|2e1.1o1	TRUE	FALSE	FALSE	2	2	1	chr17	-	ENSG00000282936.2:s:6635898-6640456_6635171-6635898	6635898	6640456	6635171	6635898			727	chr17:6635171-6635898	chr17:6635898-6640456	4558	1	source	annotated	FALSE
AC017116.2	ENSG00000285596.1	ENSG00000285596.1:s:44016434-44016523	-0.114827268609491	0.613024226547721	2.94743361686223e-05	0.171	0.044	s|1e1.1o1|1e2.1o1|i	FALSE	FALSE	TRUE	3	3	0	chr7	-	ENSG00000285596.1:s:44016434-44016523_44014779-44016434		44014779	44014779	44016434	44013680	44016433	1655	chr7:44014779-44016434	chr7:nan-44014779			source	ambig_gene	FALSE
AC017116.2	ENSG00000285596.1	ENSG00000285596.1:s:44016434-44016523	0.0625967971781815	0.284412157498513	9.63787318366185e-05	0.458	0.562	s|1e1.1o1|1e2.1o1|i	FALSE	FALSE	TRUE	3	3	1	chr7	-	ENSG00000285596.1:s:44016434-44016523_44013679-44016434	44011882	44013679	44013679	44016434			2755	chr7:44013679-44016434	chr7:44011882-44013679	1797	0	source	annotated	FALSE
AC017116.2	ENSG00000285596.1	ENSG00000285596.1:s:44016434-44016523	0.0117920779620086	0.076422623525594	0.000286741230707516	0.373	0.394	s|1e1.1o1|1e2.1o1|i	FALSE	FALSE	TRUE	3	3	0	chr7	-	ENSG00000285596.1:s:44016434-44016523_44013680-44016433	44016434	44016523	44013680	44016433			2753	chr7:44013680-44016433	chr7:44016434-44016523	89	2	source	none	FALSE
RPUSD1	ENSG00000007376.8	ENSG00000007376.8:s:788256-788397	-0.134044698623741	0.74085371137358	1.57157792191054e-06	0.911	0.763	s|1e1.2o3|1e1.3o3|1e2.1o2	FALSE	TRUE	TRUE	3	3	1	chr16	-	ENSG00000007376.8:s:788256-788397_787744-788256	787344	787477	787744	788256			512	chr16:787744-788256	chr16:787344-787477	133	1	source	annotated	FALSE
RPUSD1	ENSG00000007376.8	ENSG00000007376.8:s:788256-788397	0.0845077719014277	0.379329906949748	5.21528313292859e-06	0.079	0.182	s|1e1.2o3|1e1.3o3|1e2.1o2	FALSE	TRUE	TRUE	3	3	1	chr16	-	ENSG00000007376.8:s:788256-788397_787645-788256	787556	787981	787645	788256			611	chr16:787645-788256	chr16:787556-787981	425	2	source	annotated	FALSE
RPUSD1	ENSG00000007376.8	ENSG00000007376.8:s:788256-788397	0.0178583822251986	0.00127674774657055	0.00106150975382672	0.011	0.053	s|1e1.2o3|1e1.3o3|1e2.1o2	FALSE	TRUE	TRUE	3	3	1	chr16	-	ENSG00000007376.8:s:788256-788397_787477-788256	788256	788397	787477	788256			779	chr16:787477-788256	chr16:788256-788397	141	0	source	annotated	FALSE
MNAT1	ENSG00000020426.11	ENSG00000020426.11:s:60811986-60812127	0.327445081524101	0.999994032761916	1.90411951123854e-12	0.008	0.358	s|1e1.1o1|1e2.1o2	FALSE	FALSE	TRUE	2	3	0	chr14	+	ENSG00000020426.11:s:60811986-60812127_60812127-60817918	60811986	60812127	60812127	60817918			5791	chr14:60812127-60817918	chr14:60811986-60812127	141	0	source	novel_acceptor	TRUE
MNAT1	ENSG00000020426.11	ENSG00000020426.11:s:60811986-60812127	-0.327445101866852	0.999994034251946	1.07502895474454e-12	0.992	0.642	s|1e1.1o1|1e2.1o2	FALSE	FALSE	TRUE	2	3	1	chr14	+	ENSG00000020426.11:s:60811986-60812127_60812127-60818722	60817918	60817949	60812127	60818722			6595	chr14:60812127-60818722	chr14:60817918-60817949	31	1	source	annotated	FALSE
MNAT1	ENSG00000020426.11	ENSG00000020426.11:t:60818722-60818860	-0.283870285234353	0.999786988654922	6.90199009056869e-11	0.997	0.682	t|1e1.1o1|1e2.1o1	FALSE	FALSE	TRUE	2	3	1	chr14	+	ENSG00000020426.11:t:60818722-60818860_60812127-60818722	60811986	60812127	60812127	60818722			6595	chr14:60812127-60818722	chr14:60811986-60812127	141	0	target	annotated	FALSE
MNAT1	ENSG00000020426.11	ENSG00000020426.11:t:60818722-60818860	0.283870234517914	0.999786970795652	7.0544847509481e-11	0.003	0.318	t|1e1.1o1|1e2.1o1	FALSE	FALSE	TRUE	2	3	0	chr14	+	ENSG00000020426.11:t:60818722-60818860_60817949-60818722	60817918	60817949	60817949	60818722			773	chr14:60817949-60818722	chr14:60817918-60817949	31	1	target	novel_donor	TRUE
KIAA0556	ENSG00000047578.13	ENSG00000047578.13:s:27773099-27773209	-0.114167566086058	0.528881537328	4.67854319634586e-05	0.725	0.548	s|1e1.1o1|i	FALSE	FALSE	FALSE	2	2	1	chr16	+	ENSG00000047578.13:s:27773099-27773209_27773209-27774945	27773099	27773209	27773209	27774945	27773210	27774944	1736	chr16:27773209-27774945	chr16:27773099-27773209	110	2	source	annotated	FALSE
KIAA0556	ENSG00000047578.13	ENSG00000047578.13:s:27773099-27773209	0.11416752659877	0.528881105412904	4.67822993344275e-05	0.275	0.452	s|1e1.1o1|i	FALSE	FALSE	FALSE	2	2	0	chr16	+	ENSG00000047578.13:s:27773099-27773209_27773210-27774944	27774945	27775084	27773210	27774944			1734	chr16:27773210-27774944	chr16:27774945-27775084	139	1	source	none	FALSE
KIAA0556	ENSG00000047578.13	ENSG00000047578.13:t:27677729-27677996	-0.0510412664124792	0.206398875826456	1.1923330440422e-05	0.241	0.152	t|1e1.1o2|1e2.1o1|1e3.2o2	FALSE	FALSE	TRUE	3	4	0	chr16	+	ENSG00000047578.13:t:27677729-27677996_27631162-27677729	27631065	27631254	27631162	27677729			46567	chr16:27631162-27677729	chr16:27631065-27631254	189	0	target	novel_exon_skip	FALSE
KIAA0556	ENSG00000047578.13	ENSG00000047578.13:t:27677729-27677996	0.136661063479752	0.641608342790736	3.62339542927062e-06	0.278	0.466	t|1e1.1o2|1e2.1o1|1e3.2o2	FALSE	FALSE	TRUE	3	4	1	chr16	+	ENSG00000047578.13:t:27677729-27677996_27648735-27677729	27648604	27648735	27648735	27677729			28994	chr16:27648735-27677729	chr16:27648604-27648735	131	2	target	annotated	FALSE
KIAA0556	ENSG00000047578.13	ENSG00000047578.13:t:27677729-27677996	-0.0493194447625498	0.220437336910706	1.20350006888037e-05	0.482	0.384	t|1e1.1o2|1e2.1o1|1e3.2o2	FALSE	FALSE	TRUE	3	4	1	chr16	+	ENSG00000047578.13:t:27677729-27677996_27654736-27677729	27654608	27654736	27654736	27677729			22993	chr16:27654736-27677729	chr16:27654608-27654736	128	2	target	annotated	FALSE
KMT2C	ENSG00000055609.18	ENSG00000055609.18:s:152199279-152199459	-0.102141955633509	0.502013702032736	4.54179728570647e-06	0.84	0.707	s|1e1.1o1|1e2.1o1	FALSE	FALSE	TRUE	2	3	1	chr7	-	ENSG00000055609.18:s:152199279-152199459_152196011-152199279	152194440	152194568	152196011	152199279			3268	chr7:152196011-152199279	chr7:152194440-152194568	128	2	source	annotated	FALSE
KMT2C	ENSG00000055609.18	ENSG00000055609.18:s:152199279-152199459	0.102141945253581	0.502013487432488	4.54154109674813e-06	0.16	0.293	s|1e1.1o1|1e2.1o1	FALSE	FALSE	TRUE	2	3	0	chr7	-	ENSG00000055609.18:s:152199279-152199459_152194568-152199279	152195907	152196011	152194568	152199279			4711	chr7:152194568-152199279	chr7:152195907-152196011	104	2	source	novel_exon_skip	FALSE
POLD1	ENSG00000062822.14	ENSG00000062822.14:s:50384204-50384390	-0.033812153431987	0.0380029373294765	6.00230291789572e-05	0.075	0.006	s|1e1.1o1|1e2.1o1|1e3.1o2|1e3.2o2	FALSE	TRUE	TRUE	4	4	1	chr19	+	ENSG00000062822.14:s:50384204-50384390_50384390-50387660	50384204	50384390	50384390	50387660			3270	chr19:50384390-50387660	chr19:50384204-50384390	186	0	source	annotated	FALSE
POLD1	ENSG00000062822.14	ENSG00000062822.14:s:50384204-50384390	0.0127358080458616	0.0179870346267808	6.71454897547361e-05	0.027	0.058	s|1e1.1o1|1e2.1o1|1e3.1o2|1e3.2o2	FALSE	TRUE	TRUE	4	4	1	chr19	+	ENSG00000062822.14:s:50384204-50384390_50384390-50395025	50387660	50387804	50384390	50395025			10635	chr19:50384390-50395025	chr19:50387660-50387804	144	0	source	annotated	FALSE
POLD1	ENSG00000062822.14	ENSG00000062822.14:s:50384204-50384390	0.154298147078075	0.712000694215982	2.91821569212389e-06	0.087	0.292	s|1e1.1o1|1e2.1o1|1e3.1o2|1e3.2o2	FALSE	TRUE	TRUE	4	4	1	chr19	+	ENSG00000062822.14:s:50384204-50384390_50384390-50398848	50395025	50395150	50384390	50398848			14458	chr19:50384390-50398848	chr19:50395025-50395150	125	2	source	annotated	FALSE
POLD1	ENSG00000062822.14	ENSG00000062822.14:s:50384204-50384390	-0.0968904599803822	0.441177173419597	6.55856897935347e-06	0.811	0.642	s|1e1.1o1|1e2.1o1|1e3.1o2|1e3.2o2	FALSE	TRUE	TRUE	4	4	1	chr19	+	ENSG00000062822.14:s:50384204-50384390_50384390-50398851	50398848	50399053	50384390	50398851			14461	chr19:50384390-50398851	chr19:50398848-50399053	205	1	source	annotated	FALSE
POLD1	ENSG00000062822.14	ENSG00000062822.14:t:50398848-50399053	0.131115857118677	0.61471199635612	3.89556283407965e-06	0.095	0.28	t|1e1.1o1|2e1.1o1|2e2.1o1	FALSE	TRUE	TRUE	3	3	1	chr19	+	ENSG00000062822.14:t:50398848-50399053_50384390-50398848	50384204	50384390	50384390	50398848			14458	chr19:50384390-50398848	chr19:50384204-50384390	186	0	target	annotated	FALSE
POLD1	ENSG00000062822.14	ENSG00000062822.14:t:50398848-50399053	-0.211713406383827	0.864705241429361	1.72512099483324e-06	0.875	0.613	t|1e1.1o1|2e1.1o1|2e2.1o1	FALSE	TRUE	TRUE	3	3	1	chr19	+	ENSG00000062822.14:t:50398848-50399053_50384390-50398851	50395025	50395150	50384390	50398851			14461	chr19:50384390-50398851	chr19:50395025-50395150	125	2	target	annotated	FALSE
POLD1	ENSG00000062822.14	ENSG00000062822.14:t:50398848-50399053	0.0425619498594523	0.120293332240259	2.09354013137586e-05	0.03	0.106	t|1e1.1o1|2e1.1o1|2e2.1o1	FALSE	TRUE	TRUE	3	3	1	chr19	+	ENSG00000062822.14:t:50398848-50399053_50395150-50398851	50398848	50399053	50395150	50398851			3701	chr19:50395150-50398851	chr19:50398848-50399053	205	1	target	annotated	FALSE
ZFAT	ENSG00000066827.16	ENSG00000066827.16:t:134637461-134637712	-0.228083902546257	0.982947027927538	6.88151053918062e-08	0.992	0.729	t|1e1.1o1|1e2.1o1	FALSE	FALSE	TRUE	2	3	1	chr8	-	ENSG00000066827.16:t:134637461-134637712_134637712-134657561	134637461	134637712	134637712	134657561			19849	chr8:134637712-134657561	chr8:134637461-134637712	251	2	target	annotated	FALSE
ZFAT	ENSG00000066827.16	ENSG00000066827.16:t:134637461-134637712	0.228083881867643	0.982946984197902	6.88111738842587e-08	0.008	0.271	t|1e1.1o1|1e2.1o1	FALSE	FALSE	TRUE	2	3	0	chr8	-	ENSG00000066827.16:t:134637461-134637712_134637712-134645005	134645005		134637712	134645005			7293	chr8:134637712-134645005	chr8:134645005-nan			target	novel_donor	TRUE
CAMK2A	ENSG00000070808.15	ENSG00000070808.15:t:150222989-150223217	0.0461900122896086	0.176815596236451	1.3883477732091e-05	0.157	0.241	t|1e1.1o1|1e2.1o2|1e2.2o2	TRUE	FALSE	TRUE	3	3	0	chr5	-	ENSG00000070808.15:t:150222989-150223217_150223217-150231305	150222989	150223217	150223217	150231305			8088	chr5:150223217-150231305	chr5:150222989-150223217	228	0	target	novel_exon_skip	FALSE
CAMK2A	ENSG00000070808.15	ENSG00000070808.15:t:150222989-150223217	-0.137305619231618	0.654823635424192	3.3727543705675e-06	0.698	0.511	t|1e1.1o1|1e2.1o2|1e2.2o2	TRUE	FALSE	TRUE	3	3	1	chr5	-	ENSG00000070808.15:t:150222989-150223217_150223217-150228192	150228055	150228286	150223217	150228192			4975	chr5:150223217-150228192	chr5:150228055-150228286	231	0	target	annotated	FALSE
CAMK2A	ENSG00000070808.15	ENSG00000070808.15:t:150222989-150223217	0.0605344165943623	0.249970612094231	1.02764391751681e-05	0.144	0.245	t|1e1.1o1|1e2.1o2|1e2.2o2	TRUE	FALSE	TRUE	3	3	0	chr5	-	ENSG00000070808.15:t:150222989-150223217_150223217-150228055	150231305	150231380	150223217	150228055			4838	chr5:150223217-150228055	chr5:150231305-150231380	75	0	target	novel_donor	FALSE
RAP1GAP	ENSG00000076864.19	ENSG00000076864.19:s:21599494-21599575	0.130524054011034	0.762827402415839	4.05659158907018e-07	0.001	0.16	s|1e1.1o1|1e2.1o2	FALSE	FALSE	TRUE	2	3	0	chr1	-	ENSG00000076864.19:s:21599494-21599575_21598820-21599494	21598400	21598502	21598820	21599494			674	chr1:21598820-21599494	chr1:21598400-21598502	102	0	source	novel_acceptor	TRUE
RAP1GAP	ENSG00000076864.19	ENSG00000076864.19:s:21599494-21599575	-0.130524090627897	0.762827603738806	4.05680476434078e-07	0.999	0.84	s|1e1.1o1|1e2.1o2	FALSE	FALSE	TRUE	2	3	1	chr1	-	ENSG00000076864.19:s:21599494-21599575_21598502-21599494	21598723	21598820	21598502	21599494			992	chr1:21598502-21599494	chr1:21598723-21598820	97	1	source	annotated	FALSE
SMARCA2	ENSG00000080503.24	ENSG00000080503.24:t:2028987-2029247	0.0139684068892891	0.0826895382709631	2.53109291567244e-05	0.729	0.761	t|1e1.1o1|1e2.1o1|1e3.2o2|1e4.1o1	FALSE	FALSE	TRUE	4	5	1	chr9	+	ENSG00000080503.24:t:2028987-2029247_2015404-2028987	2015186	2015404	2015404	2028987			13583	chr9:2015404-2028987	chr9:2015186-2015404	218	2	target	annotated	FALSE
SMARCA2	ENSG00000080503.24	ENSG00000080503.24:t:2028987-2029247	-0.0650323992746296	0.242092855567504	1.04007937593575e-05	0.127	0.032	t|1e1.1o1|1e2.1o1|1e3.2o2|1e4.1o1	FALSE	FALSE	TRUE	4	5	1	chr9	+	ENSG00000080503.24:t:2028987-2029247_2017207-2028987	2017087	2017207	2017207	2028987			11780	chr9:2017207-2028987	chr9:2017087-2017207	120	0	target	annotated	FALSE
SMARCA2	ENSG00000080503.24	ENSG00000080503.24:t:2028987-2029247	-0.0436158110564878	0.075546546780189	3.51724898761674e-05	0.087	0.004	t|1e1.1o1|1e2.1o1|1e3.2o2|1e4.1o1	FALSE	FALSE	TRUE	4	5	1	chr9	+	ENSG00000080503.24:t:2028987-2029247_2017502-2028987	2017412	2017502	2017502	2028987			11485	chr9:2017502-2028987	chr9:2017412-2017502	90	0	target	annotated	FALSE
SMARCA2	ENSG00000080503.24	ENSG00000080503.24:t:2028987-2029247	0.111493966217698	0.553221159918511	4.02000496843181e-06	0.058	0.203	t|1e1.1o1|1e2.1o1|1e3.2o2|1e4.1o1	FALSE	FALSE	TRUE	4	5	1	chr9	+	ENSG00000080503.24:t:2028987-2029247_2017799-2028987	2017586	2017799	2017799	2028987			11188	chr9:2017799-2028987	chr9:2017586-2017799	213	0	target	annotated	FALSE
ERC1	ENSG00000082805.20	ENSG00000082805.20:t:1027747-1028339	0.0713914942009112	0.28649742898069	8.9996710029143e-06	0.114	0.213	t|1e1.1o1|1e2.1o3|1e2.2o3|1e2.3o3	TRUE	FALSE	TRUE	4	3	1	chr12	+	ENSG00000082805.20:t:1027747-1028339_990629-1027748	990509	990629	990629	1027748			37119	chr12:990629-1027748	chr12:990509-990629	120	0	target	annotated	FALSE
ERC1	ENSG00000082805.20	ENSG00000082805.20:t:1027747-1028339	-0.0190268006559706	0.0533002598404073	3.42254079088722e-05	0.282	0.243	t|1e1.1o1|1e2.1o3|1e2.2o3|1e2.3o3	TRUE	FALSE	TRUE	4	3	1	chr12	+	ENSG00000082805.20:t:1027747-1028339_991322-1027748	991208	991619	991322	1027748			36426	chr12:991322-1027748	chr12:991208-991619	411	0	target	annotated	FALSE
ERC1	ENSG00000082805.20	ENSG00000082805.20:t:1027747-1028339	-0.108326919665178	0.536184480835283	4.24777933094589e-06	0.49	0.347	t|1e1.1o1|1e2.1o3|1e2.2o3|1e2.3o3	TRUE	FALSE	TRUE	4	3	1	chr12	+	ENSG00000082805.20:t:1027747-1028339_991487-1027748	1027747	1028339	991487	1027748			36261	chr12:991487-1027748	chr12:1027747-1028339	592	1	target	annotated	FALSE
ERC1	ENSG00000082805.20	ENSG00000082805.20:t:1027747-1028339	0.0540649968533753	0.17901671020212	1.42195284000755e-05	0.114	0.196	t|1e1.1o1|1e2.1o3|1e2.2o3|1e2.3o3	TRUE	FALSE	TRUE	4	3	0	chr12	+	ENSG00000082805.20:t:1027747-1028339_991619-1027748			991619	1027748			36129	chr12:991619-1027748	chr12:NA-NA			target	novel_donor	FALSE
EDEM2	ENSG00000088298.13	ENSG00000088298.13:s:35134738-35134949	-0.220331906968475	0.874632040180622	1.74179098411109e-06	0.509	0.241	s|1e1.1o1|1e2.1o1	FALSE	FALSE	TRUE	2	3	0	chr20	-	ENSG00000088298.13:s:35134738-35134949_35134155-35134738	35131642	35131783	35134155	35134738			583	chr20:35134155-35134738	chr20:35131642-35131783	141	0	source	novel_acceptor	FALSE
EDEM2	ENSG00000088298.13	ENSG00000088298.13:s:35134738-35134949	0.220331896568938	0.874632005021152	1.74171062485641e-06	0.491	0.759	s|1e1.1o1|1e2.1o1	FALSE	FALSE	TRUE	2	3	1	chr20	-	ENSG00000088298.13:s:35134738-35134949_35131783-35134738	35134105	35134155	35131783	35134738			2955	chr20:35131783-35134738	chr20:35134105-35134155	50	2	source	annotated	FALSE
EDEM2	ENSG00000088298.13	ENSG00000088298.13:t:35131642-35131783	-0.019106301447264	0.0823950722625861	2.52217967416923e-05	0.304	0.261	t|1e1.1o1|1e2.1o1|1e3.1o1	FALSE	FALSE	TRUE	3	4	0	chr20	-	ENSG00000088298.13:t:35131642-35131783_35131783-35137880	35131642	35131783	35131783	35137880			6097	chr20:35131783-35137880	chr20:35131642-35131783	141	0	target	novel_exon_skip	FALSE
EDEM2	ENSG00000088298.13	ENSG00000088298.13:t:35131642-35131783	0.126412834872227	0.603202253346495	3.93816120293359e-06	0.353	0.53	t|1e1.1o1|1e2.1o1|1e3.1o1	FALSE	FALSE	TRUE	3	4	1	chr20	-	ENSG00000088298.13:t:35131642-35131783_35131783-35134738	35134105	35134155	35131783	35134738			2955	chr20:35131783-35134738	chr20:35134105-35134155	50	2	target	annotated	FALSE
EDEM2	ENSG00000088298.13	ENSG00000088298.13:t:35131642-35131783	-0.0877417415121763	0.411958066532489	6.29828109355302e-06	0.344	0.208	t|1e1.1o1|1e2.1o1|1e3.1o1	FALSE	FALSE	TRUE	3	4	0	chr20	-	ENSG00000088298.13:t:35131642-35131783_35131783-35134105	35134738	35134949	35131783	35134105			2322	chr20:35131783-35134105	chr20:35134738-35134949	211	1	target	novel_donor	FALSE
SEPT3	ENSG00000100167.20	ENSG00000100167.20:s:41994621-41994714	0.174291741015619	0.980868952371131	2.36352491367648e-14	0.297	0.47	s|1e1.1o1|i	FALSE	FALSE	FALSE	2	2	1	chr22	+	ENSG00000100167.20:s:41994621-41994714_41994714-41996902	41994621	41994714	41994714	41996902	41994715	41996901	2188	chr22:41994714-41996902	chr22:41994621-41994714	93	0	source	annotated	FALSE
SEPT3	ENSG00000100167.20	ENSG00000100167.20:s:41994621-41994714	-0.174291769583208	0.980869055999792	4.36317648677687e-14	0.703	0.53	s|1e1.1o1|i	FALSE	FALSE	FALSE	2	2	1	chr22	+	ENSG00000100167.20:s:41994621-41994714_41994715-41996901	41996902	41998221	41994715	41996901			2186	chr22:41994715-41996901	chr22:41996902-41998221	1319	2	source	none	FALSE
CDKL1	ENSG00000100490.9	ENSG00000100490.9:t:50329404-50330181	-0.0577386160660164	0.24015889139771	0.000112025335685217	0.188	0.092	t|1e1.1o1|1e2.1o3|i	FALSE	FALSE	TRUE	3	3	1	chr14	-	ENSG00000100490.9:t:50329404-50330181_50330181-50334565	50329404	50330181	50330181	50334565	50330182	50331925	4384	chr14:50330181-50334565	chr14:50329404-50330181	777	0	target	annotated	FALSE
CDKL1	ENSG00000100490.9	ENSG00000100490.9:t:50329404-50330181	0.129036743169428	0.625193502015918	3.28581517013137e-05	0.218	0.395	t|1e1.1o1|1e2.1o3|i	FALSE	FALSE	TRUE	3	3	1	chr14	-	ENSG00000100490.9:t:50329404-50330181_50330181-50332262	50331926	50332692	50330181	50332262			2081	chr14:50330181-50332262	chr14:50331926-50332692	766	1	target	annotated	FALSE
CDKL1	ENSG00000100490.9	ENSG00000100490.9:t:50329404-50330181	-0.0364471791334258	0.167006635497446	0.000155717269772815	0.592	0.51	t|1e1.1o1|1e2.1o3|i	FALSE	FALSE	TRUE	3	3	0	chr14	-	ENSG00000100490.9:t:50329404-50330181_50330182-50331925	50334565	50334621	50330182	50331925			1743	chr14:50330182-50331925	chr14:50334565-50334621	56	2	target	none	FALSE
ZNF423	ENSG00000102935.11	ENSG00000102935.11:s:49730576-49730971	0.134601916352921	0.806565701401673	8.59774378258818e-08	0.001	0.157	s|1e1.1o1|1e2.1o1	FALSE	FALSE	TRUE	2	3	0	chr16	-	ENSG00000102935.11:s:49730576-49730971_49640505-49730771	49635660	49638874	49640505	49730771			90266	chr16:49640505-49730771	chr16:49635660-49638874	3214	1	source	novel_acceptor	TRUE
ZNF423	ENSG00000102935.11	ENSG00000102935.11:s:49730576-49730971	-0.134601945480733	0.806565790858834	8.59817604892399e-08	0.999	0.843	s|1e1.1o1|1e2.1o1	FALSE	FALSE	TRUE	2	3	1	chr16	-	ENSG00000102935.11:s:49730576-49730971_49638874-49730771	49640443	49640505	49638874	49730771			91897	chr16:49638874-49730771	chr16:49640443-49640505	62	2	source	annotated	FALSE
ZNF423	ENSG00000102935.11	ENSG00000102935.11:t:49635660-49638874	-0.153757849670833	0.919513910370304	8.30301194465477e-09	0.995	0.824	t|1e1.1o2|1e2.1o1	FALSE	FALSE	TRUE	2	3	1	chr16	-	ENSG00000102935.11:t:49635660-49638874_49638874-49730771	49635660	49638874	49638874	49730771			91897	chr16:49638874-49730771	chr16:49635660-49638874	3214	1	target	annotated	FALSE
ZNF423	ENSG00000102935.11	ENSG00000102935.11:t:49635660-49638874	0.153757847698528	0.919513903583429	8.30239912582264e-09	0.005	0.176	t|1e1.1o2|1e2.1o1	FALSE	FALSE	TRUE	2	3	0	chr16	-	ENSG00000102935.11:t:49635660-49638874_49638874-49640443	49640443	49640505	49638874	49640443			1569	chr16:49638874-49640443	chr16:49640443-49640505	62	2	target	novel_donor	TRUE
TUSC3	ENSG00000104723.20	ENSG00000104723.20:s:15757791-15757859	-0.133554822987181	0.733820531793904	1.49509805535963e-06	0.42	0.279	s|1e1.1o2|1e2.1o1	FALSE	FALSE	TRUE	2	3	1	chr8	+	ENSG00000104723.20:s:15757791-15757859_15757855-15758030	15757791	15757859	15757855	15758030			175	chr8:15757855-15758030	chr8:15757791-15757859	68	2	source	annotated	FALSE
TUSC3	ENSG00000104723.20	ENSG00000104723.20:s:15757791-15757859	0.133554859661889	0.733820603164809	1.49501478997695e-06	0.58	0.721	s|1e1.1o2|1e2.1o1	FALSE	FALSE	TRUE	2	3	1	chr8	+	ENSG00000104723.20:s:15757791-15757859_15757855-15764203	15758030	15758277	15757855	15764203			6348	chr8:15757855-15764203	chr8:15758030-15758277	247	1	source	annotated	FALSE
SLC1A6	ENSG00000105143.12	ENSG00000105143.12:s:14979000-14980298	-0.174440378517721	0.899458940634974	5.20177944440814e-06	0.53	0.34	s|1e1.3o4|1e1.4o4|2e1.3o4|3e1.3o4|i	TRUE	TRUE	FALSE	5	2	1	chr19	-	ENSG00000105143.12:s:14979000-14980298_14972917-14979513	14972689	14975273	14972917	14979513	14978275	14978999	6596	chr19:14972917-14979513	chr19:14972689-14975273	2584	1	source	annotated	FALSE
SLC1A6	ENSG00000105143.12	ENSG00000105143.12:s:14979000-14980298	-0.00250805595404389	4.89895613773538e-06	0.265607966060917	0.037	0.023	s|1e1.3o4|1e1.4o4|2e1.3o4|3e1.3o4|i	TRUE	TRUE	FALSE	5	2	1	chr19	-	ENSG00000105143.12:s:14979000-14980298_14972913-14979513	14979000	14980298	14972913	14979513			6600	chr19:14972913-14979513	chr19:14979000-14980298	1298	2	source	annotated	FALSE
SLC1A6	ENSG00000105143.12	ENSG00000105143.12:s:14979000-14980298	-0.0574010393226531	0.219169753913759	0.000123394322295578	0.327	0.242	s|1e1.3o4|1e1.4o4|2e1.3o4|3e1.3o4|i	TRUE	TRUE	FALSE	5	2	1	chr19	-	ENSG00000105143.12:s:14979000-14980298_14972917-14979309			14972917	14979309			6392	chr19:14972917-14979309	chr19:NA-NA			source	annotated	FALSE
SLC1A6	ENSG00000105143.12	ENSG00000105143.12:s:14979000-14980298	0.0561783855396634	0.0737754671421299	0.000589563511391046	0.001	0.088	s|1e1.3o4|1e1.4o4|2e1.3o4|3e1.3o4|i	TRUE	TRUE	FALSE	5	2	0	chr19	-	ENSG00000105143.12:s:14979000-14980298_14972917-14979000			14972917	14979000			6083	chr19:14972917-14979000	chr19:NA-NA			source	novel_donor	FALSE
SLC1A6	ENSG00000105143.12	ENSG00000105143.12:s:14979000-14980298	0.193794462562058	0.975892260826534	3.95668139852349e-07	0.103	0.308	s|1e1.3o4|1e1.4o4|2e1.3o4|3e1.3o4|i	TRUE	TRUE	FALSE	5	2	0	chr19	-	ENSG00000105143.12:s:14979000-14980298_14978275-14978999			14978275	14978999			724	chr19:14978275-14978999	chr19:NA-NA			source	none	FALSE
SLC1A6	ENSG00000105143.12	ENSG00000105143.12:t:14972689-14975273	-0.185528046194989	0.93584851507343	2.73356001234681e-06	0.518	0.32	t|1e1.1o3|1e1.2o3|1e1.3o3|1e2.1o1|2e3.1o3|i	TRUE	TRUE	TRUE	6	4	1	chr19	-	ENSG00000105143.12:t:14972689-14975273_14972917-14979513	14972689	14975273	14972917	14979513	14975274	14976760	6596	chr19:14972917-14979513	chr19:14972689-14975273	2584	1	target	annotated	FALSE
SLC1A6	ENSG00000105143.12	ENSG00000105143.12:t:14972689-14975273	-0.0670614376143572	0.277707158075409	9.60380854075904e-05	0.319	0.228	t|1e1.1o3|1e1.2o3|1e1.3o3|1e2.1o1|2e3.1o3|i	TRUE	TRUE	TRUE	6	4	1	chr19	-	ENSG00000105143.12:t:14972689-14975273_14972917-14979309	14976761	14977032	14972917	14979309			6392	chr19:14972917-14979309	chr19:14976761-14977032	271	1	target	annotated	FALSE
SLC1A6	ENSG00000105143.12	ENSG00000105143.12:t:14972689-14975273	0.0519292297268851	0.0447689942090259	0.000992182461346716	0.001	0.082	t|1e1.1o3|1e1.2o3|1e1.3o3|1e2.1o1|2e3.1o3|i	TRUE	TRUE	TRUE	6	4	0	chr19	-	ENSG00000105143.12:t:14972689-14975273_14972917-14979000	14979000	14980298	14972917	14979000			6083	chr19:14972917-14979000	chr19:14979000-14980298	1298	2	target	novel_donor	FALSE
SLC1A6	ENSG00000105143.12	ENSG00000105143.12:t:14972689-14975273	0.110663951673571	0.600968662436288	2.12455588436721e-05	0.076	0.199	t|1e1.1o3|1e1.2o3|1e1.3o3|1e2.1o1|2e3.1o3|i	TRUE	TRUE	TRUE	6	4	1	chr19	-	ENSG00000105143.12:t:14972689-14975273_14972917-14976761			14972917	14976761			3844	chr19:14972917-14976761	chr19:NA-NA			target	annotated	FALSE
SLC1A6	ENSG00000105143.12	ENSG00000105143.12:t:14972689-14975273	-0.00221577171738861	3.13452449048667e-06	0.297111507656739	0.036	0.021	t|1e1.1o3|1e1.2o3|1e1.3o3|1e2.1o1|2e3.1o3|i	TRUE	TRUE	TRUE	6	4	1	chr19	-	ENSG00000105143.12:t:14972689-14975273_14972913-14979513			14972913	14979513			6600	chr19:14972913-14979513	chr19:NA-NA			target	annotated	FALSE
SLC1A6	ENSG00000105143.12	ENSG00000105143.12:t:14972689-14975273	0.0940930719112916	0.447318521864151	5.79942094928302e-05	0.047	0.154	t|1e1.1o3|1e1.2o3|1e1.3o3|1e2.1o1|2e3.1o3|i	TRUE	TRUE	TRUE	6	4	0	chr19	-	ENSG00000105143.12:t:14972689-14975273_14975274-14976760			14975274	14976760			1486	chr19:14975274-14976760	chr19:NA-NA			target	none	FALSE
RECQL5	ENSG00000108469.15	ENSG00000108469.15:s:75628934-75629095	0.115012690580493	0.623036033203032	1.87016294249181e-06	0.023	0.156	s|1e1.2o3|1e1.3o3	FALSE	TRUE	FALSE	2	2	1	chr17	-	ENSG00000108469.15:s:75628934-75629095_75628825-75628934	75628672	75628874	75628825	75628934			109	chr17:75628825-75628934	chr17:75628672-75628874	202	1	source	annotated	FALSE
RECQL5	ENSG00000108469.15	ENSG00000108469.15:s:75628934-75629095	-0.115012755115211	0.623036630458299	1.87026774500776e-06	0.977	0.844	s|1e1.2o3|1e1.3o3	FALSE	TRUE	FALSE	2	2	1	chr17	-	ENSG00000108469.15:s:75628934-75629095_75628762-75628934	75628934	75629095	75628762	75628934			172	chr17:75628762-75628934	chr17:75628934-75629095	161	2	source	annotated	FALSE
SH3D19	ENSG00000109686.18	ENSG00000109686.18:t:151102751-151103132	-0.14896359243744	0.754610522102655	2.02125237380724e-06	0.346	0.169	t|1e1.2o2|1e2.1o1	FALSE	FALSE	TRUE	2	3	0	chr4	-	ENSG00000109686.18:t:151102751-151103132_151103079-151139556	151102751	151103132	151103079	151139556			36477	chr4:151103079-151139556	chr4:151102751-151103132	381	0	target	none	FALSE
SH3D19	ENSG00000109686.18	ENSG00000109686.18:t:151102751-151103132	0.14896357498025	0.754610364028312	2.02114939928999e-06	0.654	0.831	t|1e1.2o2|1e2.1o1	FALSE	FALSE	TRUE	2	3	0	chr4	-	ENSG00000109686.18:t:151102751-151103132_151103079-151104472	151104472		151103079	151104472			1393	chr4:151103079-151104472	chr4:151104472-nan			target	none	FALSE
CAPRIN2	ENSG00000110888.17	ENSG00000110888.17:t:30714927-30715377	-0.020548622438413	0.0263513183863927	0.000726178415273893	0.16	0.12	t|1e1.2o3|1e2.1o1|2e3.2o3|2e4.1o1|3e5.2o3|i	FALSE	TRUE	TRUE	6	6	1	chr12	-	ENSG00000110888.17:t:30714927-30715377_30715144-30716508	30714927	30715377	30715144	30716508	30715378	30715453	1364	chr12:30715144-30716508	chr12:30714927-30715377	450	0	target	annotated	FALSE
CAPRIN2	ENSG00000110888.17	ENSG00000110888.17:t:30714927-30715377	-0.0547245606014956	0.0923961463259561	0.000417539331203032	0.092	0.029	t|1e1.2o3|1e2.1o1|2e3.2o3|2e4.1o1|3e5.2o3|i	FALSE	TRUE	TRUE	6	6	0	chr12	-	ENSG00000110888.17:t:30714927-30715377_30715144-30715454	30715454	30715503	30715144	30715454			310	chr12:30715144-30715454	chr12:30715454-30715503	49	1	target	novel_donor	FALSE
CAPRIN2	ENSG00000110888.17	ENSG00000110888.17:t:30714927-30715377	-0.0952068577916243	0.465992783872634	5.17930102491571e-05	0.267	0.156	t|1e1.2o3|1e2.1o1|2e3.2o3|2e4.1o1|3e5.2o3|i	FALSE	TRUE	TRUE	6	6	1	chr12	-	ENSG00000110888.17:t:30714927-30715377_30715141-30716508	30716290	30716676	30715141	30716508			1367	chr12:30715141-30716508	chr12:30716290-30716676	386	2	target	annotated	FALSE
CAPRIN2	ENSG00000110888.17	ENSG00000110888.17:t:30714927-30715377	-0.00552318301283847	0.00153397747844867	0.00714077619134934	0.097	0.085	t|1e1.2o3|1e2.1o1|2e3.2o3|2e4.1o1|3e5.2o3|i	FALSE	TRUE	TRUE	6	6	0	chr12	-	ENSG00000110888.17:t:30714927-30715377_30715141-30715454			30715141	30715454			313	chr12:30715141-30715454	chr12:NA-NA			target	novel_donor	FALSE
CAPRIN2	ENSG00000110888.17	ENSG00000110888.17:t:30714927-30715377	-0.0113711768277777	0.0046965935024879	0.00340207617327004	0.113	0.093	t|1e1.2o3|1e2.1o1|2e3.2o3|2e4.1o1|3e5.2o3|i	FALSE	TRUE	TRUE	6	6	1	chr12	-	ENSG00000110888.17:t:30714927-30715377_30715081-30716508			30715081	30716508			1427	chr12:30715081-30716508	chr12:NA-NA			target	annotated	FALSE
CAPRIN2	ENSG00000110888.17	ENSG00000110888.17:t:30714927-30715377	0.239317482880002	0.992890973862962	2.21239008995083e-07	0.271	0.518	t|1e1.2o3|1e2.1o1|2e3.2o3|2e4.1o1|3e5.2o3|i	FALSE	TRUE	TRUE	6	6	0	chr12	-	ENSG00000110888.17:t:30714927-30715377_30715378-30715453			30715378	30715453			75	chr12:30715378-30715453	chr12:NA-NA			target	none	FALSE
PHC1	ENSG00000111752.11	ENSG00000111752.11:s:8914509-8914827	-5.51463289563029e-09	7.2995097936962e-21	0.587318923535956	0.016	0.004	s|1e1.1o1|1e2.2o2|1e3.1o2|i	FALSE	FALSE	TRUE	4	4	0	chr12	+	ENSG00000111752.11:s:8914509-8914827_8914827-8915111	8914509	8914827	8914827	8915111	8914828	8915759	284	chr12:8914827-8915111	chr12:8914509-8914827	318	0	source	novel_acceptor	FALSE
PHC1	ENSG00000111752.11	ENSG00000111752.11:s:8914509-8914827	0.141003545796299	0.825832478649993	6.47317040692037e-06	0.135	0.275	s|1e1.1o1|1e2.2o2|1e3.1o2|i	FALSE	FALSE	TRUE	4	4	1	chr12	+	ENSG00000111752.11:s:8914509-8914827_8914827-8916061	8915111		8914827	8916061			1234	chr12:8914827-8916061	chr12:8915111-nan			source	annotated	FALSE
PHC1	ENSG00000111752.11	ENSG00000111752.11:s:8914509-8914827	-0.101847081434675	0.526611059099688	3.60148876292765e-05	0.697	0.583	s|1e1.1o1|1e2.2o2|1e3.1o2|i	FALSE	FALSE	TRUE	4	4	1	chr12	+	ENSG00000111752.11:s:8914509-8914827_8914827-8917630	8915760	8916069	8914827	8917630			2803	chr12:8914827-8917630	chr12:8915760-8916069	309	0	source	annotated	FALSE
PHC1	ENSG00000111752.11	ENSG00000111752.11:s:8914509-8914827	-0.00878412295306345	0.00190441752697898	0.00578118991898358	0.151	0.132	s|1e1.1o1|1e2.2o2|1e3.1o2|i	FALSE	FALSE	TRUE	4	4	0	chr12	+	ENSG00000111752.11:s:8914509-8914827_8914828-8915759	8917630	8917791	8914828	8915759			931	chr12:8914828-8915759	chr12:8917630-8917791	161	2	source	none	FALSE
QKI	ENSG00000112531.17	ENSG00000112531.17:s:163561982-163562069	0.191446501727913	0.896880848384503	9.4018433999695e-07	0.307	0.521	s|1e1.1o2|1e1.2o2	FALSE	TRUE	FALSE	2	2	1	chr6	+	ENSG00000112531.17:s:163561982-163562069_163562069-163563420	163561982	163562069	163562069	163563420			1351	chr6:163562069-163563420	chr6:163561982-163562069	87	0	source	annotated	FALSE
QKI	ENSG00000112531.17	ENSG00000112531.17:s:163561982-163562069	-0.191446480787681	0.896880884425427	9.40228650492259e-07	0.693	0.479	s|1e1.1o2|1e1.2o2	FALSE	TRUE	FALSE	2	2	1	chr6	+	ENSG00000112531.17:s:163561982-163562069_163562069-163563444	163563420	163563719	163562069	163563444			1375	chr6:163562069-163563444	chr6:163563420-163563719	299	2	source	annotated	FALSE
KIAA1324	ENSG00000116299.17	ENSG00000116299.17:s:109197474-109197654	-0.243372003468031	0.999797511647612	1.1829470736302e-10	0.982	0.729	s|1e1.1o1|1e2.1o1	FALSE	FALSE	TRUE	2	3	1	chr1	+	ENSG00000116299.17:s:109197474-109197654_109197654-109197979	109197474	109197654	109197654	109197979			325	chr1:109197654-109197979	chr1:109197474-109197654	180	0	source	annotated	FALSE
KIAA1324	ENSG00000116299.17	ENSG00000116299.17:s:109197474-109197654	0.243371984753965	0.999797520172072	1.17995255972144e-10	0.018	0.271	s|1e1.1o1|1e2.1o1	FALSE	FALSE	TRUE	2	3	0	chr1	+	ENSG00000116299.17:s:109197474-109197654_109197654-109198573	109197979	109198075	109197654	109198573			919	chr1:109197654-109198573	chr1:109197979-109198075	96	0	source	novel_exon_skip	TRUE
KIAA1324	ENSG00000116299.17	ENSG00000116299.17:s:109200735-109200900	0.00991358033661168	0.000544611101850463	0.00187210300992567	0.031	0.049	s|1e1.1o1|1e2.1o2|1e2.2o2	FALSE	TRUE	TRUE	3	3	1	chr1	+	ENSG00000116299.17:s:109200735-109200900_109200900-109201319	109200735	109200900	109200900	109201319			419	chr1:109200900-109201319	chr1:109200735-109200900	165	0	source	annotated	FALSE
KIAA1324	ENSG00000116299.17	ENSG00000116299.17:s:109200735-109200900	-0.22132373738393	0.97218279262454	2.23598357829147e-07	0.439	0.201	s|1e1.1o1|1e2.1o2|1e2.2o2	FALSE	TRUE	TRUE	3	3	1	chr1	+	ENSG00000116299.17:s:109200735-109200900_109200900-109202913	109201319	109201417	109200900	109202913			2013	chr1:109200900-109202913	chr1:109201319-109201417	98	2	source	annotated	FALSE
KIAA1324	ENSG00000116299.17	ENSG00000116299.17:s:109200735-109200900	0.200290817270951	0.935491657199536	5.30225497057097e-07	0.529	0.749	s|1e1.1o1|1e2.1o2|1e2.2o2	FALSE	TRUE	TRUE	3	3	1	chr1	+	ENSG00000116299.17:s:109200735-109200900_109200900-109202944	109202913	109206781	109200900	109202944			2044	chr1:109200900-109202944	chr1:109202913-109206781	3868	1	source	annotated	FALSE
KIAA1324	ENSG00000116299.17	ENSG00000116299.17:t:109187979-109188354	-0.00104313540100677	7.7402352916381e-06	0.0101981115728712	0.026	0.007	t|1e1.1o2|1e2.1o1|1e3.1o1|1e4.1o1	FALSE	FALSE	TRUE	4	5	1	chr1	+	ENSG00000116299.17:t:109187979-109188354_109173557-109188177		109186255	109173557	109188177			14620	chr1:109173557-109188177	chr1:nan-109186255			target	annotated	FALSE
KIAA1324	ENSG00000116299.17	ENSG00000116299.17:t:109187979-109188354	0.0427718165778946	0.103648686500464	1.99254446023697e-05	0.05	0.112	t|1e1.1o2|1e2.1o1|1e3.1o1|1e4.1o1	FALSE	FALSE	TRUE	4	5	1	chr1	+	ENSG00000116299.17:t:109187979-109188354_109173837-109188177	109173474	109173579	109173837	109188177			14340	chr1:109173837-109188177	chr1:109173474-109173579	105	0	target	annotated	FALSE
KIAA1324	ENSG00000116299.17	ENSG00000116299.17:t:109187979-109188354	-0.116714535023993	0.614936937179451	2.68167186856516e-06	0.878	0.744	t|1e1.1o2|1e2.1o1|1e3.1o1|1e4.1o1	FALSE	FALSE	TRUE	4	5	1	chr1	+	ENSG00000116299.17:t:109187979-109188354_109185133-109188177	109173688	109173837	109185133	109188177			3044	chr1:109185133-109188177	chr1:109173688-109173837	149	2	target	annotated	FALSE
KIAA1324	ENSG00000116299.17	ENSG00000116299.17:t:109187979-109188354	0.0771324864103907	0.314053662158836	7.20019337643933e-06	0.045	0.137	t|1e1.1o2|1e2.1o1|1e3.1o1|1e4.1o1	FALSE	FALSE	TRUE	4	5	0	chr1	+	ENSG00000116299.17:t:109187979-109188354_109186255-109188177	109185045	109185133	109186255	109188177			1922	chr1:109186255-109188177	chr1:109185045-109185133	88	1	target	novel_donor	FALSE
KIAA1324	ENSG00000116299.17	ENSG00000116299.17:t:109198573-109198674	0.260329159744578	0.999980703127849	3.98298292187322e-12	0.015	0.283	t|1e1.1o1|1e2.1o1	FALSE	FALSE	TRUE	2	3	0	chr1	+	ENSG00000116299.17:t:109198573-109198674_109197654-109198573	109197474	109197654	109197654	109198573			919	chr1:109197654-109198573	chr1:109197474-109197654	180	0	target	novel_exon_skip	TRUE
KIAA1324	ENSG00000116299.17	ENSG00000116299.17:t:109198573-109198674	-0.260329174383536	0.999980704625231	4.00757205198943e-12	0.985	0.717	t|1e1.1o1|1e2.1o1	FALSE	FALSE	TRUE	2	3	1	chr1	+	ENSG00000116299.17:t:109198573-109198674_109198075-109198573	109197979	109198075	109198075	109198573			498	chr1:109198075-109198573	chr1:109197979-109198075	96	0	target	annotated	FALSE
KIAA1324	ENSG00000116299.17	ENSG00000116299.17:t:109202913-109206781	-0.20704854604029	0.958896624678622	2.0527712677465e-06	0.421	0.195	t|1e1.2o2|2e1.2o2|2e2.1o1|i	FALSE	TRUE	TRUE	4	3	1	chr1	+	ENSG00000116299.17:t:109202913-109206781_109200900-109202913	109200735	109200900	109200900	109202913	109201418	109202912	2013	chr1:109200900-109202913	chr1:109200735-109200900	165	0	target	annotated	FALSE
KIAA1324	ENSG00000116299.17	ENSG00000116299.17:t:109202913-109206781	0.200761067054647	0.93907251068188	3.58486917542212e-06	0.505	0.727	t|1e1.2o2|2e1.2o2|2e2.1o1|i	FALSE	TRUE	TRUE	4	3	1	chr1	+	ENSG00000116299.17:t:109202913-109206781_109200900-109202944	109201319	109201417	109200900	109202944			2044	chr1:109200900-109202944	chr1:109201319-109201417	98	2	target	annotated	FALSE
KIAA1324	ENSG00000116299.17	ENSG00000116299.17:t:109202913-109206781	5.02228882070593e-05	9.37458685898939e-08	0.316545879002185	0.009	0.017	t|1e1.2o2|2e1.2o2|2e2.1o1|i	FALSE	TRUE	TRUE	4	3	1	chr1	+	ENSG00000116299.17:t:109202913-109206781_109201417-109202944	109202913	109206781	109201417	109202944			1527	chr1:109201417-109202944	chr1:109202913-109206781	3868	1	target	annotated	FALSE
KIAA1324	ENSG00000116299.17	ENSG00000116299.17:t:109202913-109206781	-0.00147103808527333	0.00273463904905985	0.00365717303917712	0.066	0.061	t|1e1.2o2|2e1.2o2|2e2.1o1|i	FALSE	TRUE	TRUE	4	3	0	chr1	+	ENSG00000116299.17:t:109202913-109206781_109201418-109202912			109201418	109202912			1494	chr1:109201418-109202912	chr1:NA-NA			target	none	FALSE
ARMC2	ENSG00000118690.13	ENSG00000118690.13:t:108876143-108876350	-0.10703552170476	0.543767598392975	3.64776141092982e-06	0.245	0.112	t|1e1.1o1|1e2.1o1	FALSE	FALSE	TRUE	2	3	0	chr6	+	ENSG00000118690.13:t:108876143-108876350_108858271-108876143	108858199	108858271	108858271	108876143			17872	chr6:108858271-108876143	chr6:108858199-108858271	72	0	target	novel_exon_skip	FALSE
ARMC2	ENSG00000118690.13	ENSG00000118690.13:t:108876143-108876350	0.107035450753172	0.543767054665291	3.64755671837512e-06	0.755	0.888	t|1e1.1o1|1e2.1o1	FALSE	FALSE	TRUE	2	3	1	chr6	+	ENSG00000118690.13:t:108876143-108876350_108868995-108876143	108868824	108868995	108868995	108876143			7148	chr6:108868995-108876143	chr6:108868824-108868995	171	0	target	annotated	FALSE
YPEL5	ENSG00000119801.13	ENSG00000119801.13:s:30148245-30148541	0.0188404098058401	0.0379309276589874	4.21478154471258e-05	0.026	0.072	s|1e1.2o2|2e2.2o2|2e3.2o2	TRUE	FALSE	TRUE	3	4	1	chr2	+	ENSG00000119801.13:s:30148245-30148541_30148305-30156628	30148245	30148541	30148305	30156628			8323	chr2:30148305-30156628	chr2:30148245-30148541	296	2	source	annotated	FALSE
YPEL5	ENSG00000119801.13	ENSG00000119801.13:s:30148245-30148541	-0.108517935444103	0.536733258726626	3.97577612676336e-06	0.161	0.01	s|1e1.2o2|2e2.2o2|2e3.2o2	TRUE	FALSE	TRUE	3	4	1	chr2	+	ENSG00000119801.13:s:30148245-30148541_30148541-30155850	30155815	30155910	30148541	30155850			7309	chr2:30148541-30155850	chr2:30155815-30155910	95	2	source	annotated	FALSE
YPEL5	ENSG00000119801.13	ENSG00000119801.13:s:30148245-30148541	0.0567728034950861	0.252912004915546	1.04048978666234e-05	0.813	0.917	s|1e1.2o2|2e2.2o2|2e3.2o2	TRUE	FALSE	TRUE	3	4	1	chr2	+	ENSG00000119801.13:s:30148245-30148541_30148541-30156628	30156378	30156792	30148541	30156628			8087	chr2:30148541-30156628	chr2:30156378-30156792	414	0	source	annotated	FALSE
PKN1	ENSG00000123143.12	ENSG00000123143.12:s:14446409-14446561	0.0634757165833455	0.130962413090599	2.31942014704536e-05	0	0.096	s|1e1.1o1|1e2.1o1|1e3.1o1	FALSE	FALSE	TRUE	3	4	0	chr19	+	ENSG00000123143.12:s:14446409-14446561_14446561-14450088	14446409	14446561	14446561	14450088			3527	chr19:14446561-14450088	chr19:14446409-14446561	152	2	source	novel_acceptor	FALSE
PKN1	ENSG00000123143.12	ENSG00000123143.12:s:14446409-14446561	-0.102868746004633	0.541042863810249	9.88812160929164e-07	0.996	0.871	s|1e1.1o1|1e2.1o1|1e3.1o1	FALSE	FALSE	TRUE	3	4	1	chr19	+	ENSG00000123143.12:s:14446409-14446561_14446561-14450318	14450088	14450214	14446561	14450318			3757	chr19:14446561-14450318	chr19:14450088-14450214	126	0	source	annotated	FALSE
PKN1	ENSG00000123143.12	ENSG00000123143.12:s:14446409-14446561	0.00106814956526978	6.27015203091917e-08	0.348778075817386	0.004	0.033	s|1e1.1o1|1e2.1o1|1e3.1o1	FALSE	FALSE	TRUE	3	4	1	chr19	+	ENSG00000123143.12:s:14446409-14446561_14446561-14458031	14450318	14450463	14446561	14458031			11470	chr19:14446561-14458031	chr19:14450318-14450463	145	1	source	annotated	FALSE
IQSEC2	ENSG00000124313.16	ENSG00000124313.16:s:53279155-53279776	-0.260645387173231	0.996466967062619	2.33999751797498e-08	0.981	0.696	s|1e1.1o1|1e2.1o1	FALSE	FALSE	TRUE	2	3	1	chrX	-	ENSG00000124313.16:s:53279155-53279776_53267064-53279564	53255800	53256061	53267064	53279564			12500	chrX:53267064-53279564	chrX:53255800-53256061	261	0	source	annotated	FALSE
IQSEC2	ENSG00000124313.16	ENSG00000124313.16:s:53279155-53279776	0.260645401607631	0.996466943941118	2.33998149198373e-08	0.019	0.304	s|1e1.1o1|1e2.1o1	FALSE	FALSE	TRUE	2	3	1	chrX	-	ENSG00000124313.16:s:53279155-53279776_53256061-53279564	53266969	53267064	53256061	53279564			23503	chrX:53256061-53279564	chrX:53266969-53267064	95	2	source	annotated	FALSE
IQSEC2	ENSG00000124313.16	ENSG00000124313.16:t:53255800-53256061	-0.362497787040088	0.996433608355601	2.38212690573114e-07	0.959	0.582	t|1e1.1o1|1e2.1o2	FALSE	FALSE	TRUE	2	3	1	chrX	-	ENSG00000124313.16:t:53255800-53256061_53256061-53291895	53255800	53256061	53256061	53291895			35834	chrX:53256061-53291895	chrX:53255800-53256061	261	0	target	annotated	FALSE
IQSEC2	ENSG00000124313.16	ENSG00000124313.16:t:53255800-53256061	0.362497717983105	0.996433510025953	2.38211083181773e-07	0.041	0.418	t|1e1.1o1|1e2.1o2	FALSE	FALSE	TRUE	2	3	1	chrX	-	ENSG00000124313.16:t:53255800-53256061_53256061-53279564	53279155	53279776	53256061	53279564			23503	chrX:53256061-53279564	chrX:53279155-53279776	621	0	target	annotated	FALSE
HIVEP3	ENSG00000127124.16	ENSG00000127124.16:s:41918413-41918922	-0.099228319363909	0.470560027881679	5.57805097078923e-06	0.562	0.415	s|1e1.1o1|1e2.1o1|1e3.1o1	FALSE	FALSE	TRUE	3	4	1	chr1	-	ENSG00000127124.16:s:41918413-41918922_41849089-41918413	41628749	41628947	41849089	41918413			69324	chr1:41849089-41918413	chr1:41628749-41628947	198	0	source	annotated	FALSE
HIVEP3	ENSG00000127124.16	ENSG00000127124.16:s:41918413-41918922	-0.0762668523207837	0.345862104781749	7.43860542895547e-06	0.303	0.183	s|1e1.1o1|1e2.1o1|1e3.1o1	FALSE	FALSE	TRUE	3	4	1	chr1	-	ENSG00000127124.16:s:41918413-41918922_41700995-41918413	41700916	41700995	41700995	41918413			217418	chr1:41700995-41918413	chr1:41700916-41700995	79	1	source	annotated	FALSE
HIVEP3	ENSG00000127124.16	ENSG00000127124.16:s:41918413-41918922	0.248685644627984	0.978526891146155	2.74291470627767e-07	0.137	0.402	s|1e1.1o1|1e2.1o1|1e3.1o1	FALSE	FALSE	TRUE	3	4	1	chr1	-	ENSG00000127124.16:s:41918413-41918922_41628947-41918413	41848871	41849089	41628947	41918413			289466	chr1:41628947-41918413	chr1:41848871-41849089	218	2	source	annotated	FALSE
HIVEP3	ENSG00000127124.16	ENSG00000127124.16:t:41518402-41518488	-0.151030850954072	0.661826063711472	3.87304038607095e-06	0.476	0.257	t|1e1.1o1|1e2.1o1	FALSE	FALSE	TRUE	2	3	1	chr1	-	ENSG00000127124.16:t:41518402-41518488_41518488-41575544	41518402	41518488	41518488	41575544			57056	chr1:41518488-41575544	chr1:41518402-41518488	86	2	target	annotated	FALSE
HIVEP3	ENSG00000127124.16	ENSG00000127124.16:t:41518402-41518488	0.151030843230304	0.661825947701897	3.87286539808808e-06	0.524	0.743	t|1e1.1o1|1e2.1o1	FALSE	FALSE	TRUE	2	3	1	chr1	-	ENSG00000127124.16:t:41518402-41518488_41518488-41524735	41524735	41524910	41518488	41524735			6247	chr1:41518488-41524735	chr1:41524735-41524910	175	1	target	annotated	FALSE
CDO1	ENSG00000129596.5	ENSG00000129596.5:s:115816228-115816659	7.77155985295739e-16	7.29950855916768e-21	0.999999999007135	0.014	0.008	s|1e1.1o1|2e2.1o1|2e3.1o1|i	TRUE	FALSE	TRUE	4	4	1	chr5	-	ENSG00000129596.5:s:115816228-115816659_115813258-115816584	115813181	115813258	115813258	115816584	115814482	115816227	3326	chr5:115813258-115816584	chr5:115813181-115813258	77	2	source	annotated	FALSE
CDO1	ENSG00000129596.5	ENSG00000129596.5:s:115816228-115816659	0.166280440559481	0.99130359957624	5.45048182577453e-16	0.002	0.188	s|1e1.1o1|2e2.1o1|2e3.1o1|i	TRUE	FALSE	TRUE	4	4	1	chr5	-	ENSG00000129596.5:s:115816228-115816659_115813954-115816228	115813898	115813954	115813954	115816228			2274	chr5:115813954-115816228	chr5:115813898-115813954	56	2	source	annotated	FALSE
CDO1	ENSG00000129596.5	ENSG00000129596.5:s:115816228-115816659	-0.213078667069265	0.999980250498923	6.66133814775094e-16	0.967	0.767	s|1e1.1o1|2e2.1o1|2e3.1o1|i	TRUE	FALSE	TRUE	4	4	1	chr5	-	ENSG00000129596.5:s:115816228-115816659_115813258-115816228	115816228	115816659	115813258	115816228			2970	chr5:115813258-115816228	chr5:115816228-115816659	431	2	source	annotated	FALSE
CDO1	ENSG00000129596.5	ENSG00000129596.5:s:115816228-115816659	0.00144072042761802	7.6883829450561e-21	0.475000531607999	0.016	0.037	s|1e1.1o1|2e2.1o1|2e3.1o1|i	TRUE	FALSE	TRUE	4	4	0	chr5	-	ENSG00000129596.5:s:115816228-115816659_115814482-115816227			115814482	115816227			1745	chr5:115814482-115816227	chr5:NA-NA			source	none	FALSE
CDO1	ENSG00000129596.5	ENSG00000129596.5:t:115813181-115813258	7.77155965710684e-16	8.56558349536148e-21	0.999999999943745	0.014	0.007	t|1e1.1o2|1e1.2o2|1e2.1o1|1e3.1o1	TRUE	FALSE	TRUE	4	4	1	chr5	-	ENSG00000129596.5:t:115813181-115813258_115813258-115816584	115813181	115813258	115813258	115816584			3326	chr5:115813258-115816584	chr5:115813181-115813258	77	2	target	annotated	FALSE
CDO1	ENSG00000129596.5	ENSG00000129596.5:t:115813181-115813258	-0.230534727671565	0.999999999994418	0	0.977	0.749	t|1e1.1o2|1e1.2o2|1e2.1o1|1e3.1o1	TRUE	FALSE	TRUE	4	4	1	chr5	-	ENSG00000129596.5:t:115813181-115813258_115813258-115816228	115813898	115813954	115813258	115816228			2970	chr5:115813258-115816228	chr5:115813898-115813954	56	2	target	annotated	FALSE
CDO1	ENSG00000129596.5	ENSG00000129596.5:t:115813181-115813258	7.77155965710684e-16	8.56558349536148e-21	0.999999999943745	0.005	0.003	t|1e1.1o2|1e1.2o2|1e2.1o1|1e3.1o1	TRUE	FALSE	TRUE	4	4	1	chr5	-	ENSG00000129596.5:t:115813181-115813258_115813258-115814286	115814286	115814481	115813258	115814286			1028	chr5:115813258-115814286	chr5:115814286-115814481	195	0	target	annotated	FALSE
CDO1	ENSG00000129596.5	ENSG00000129596.5:t:115813181-115813258	0.220912874897275	0.999999995346282	4.78647894106309e-24	0.003	0.241	t|1e1.1o2|1e1.2o2|1e2.1o1|1e3.1o1	TRUE	FALSE	TRUE	4	4	1	chr5	-	ENSG00000129596.5:t:115813181-115813258_115813258-115813898	115816228	115816659	115813258	115813898			640	chr5:115813258-115813898	chr5:115816228-115816659	431	2	target	annotated	FALSE
TBC1D5	ENSG00000131374.14	ENSG00000131374.14:t:17508474-17508605	0.102481628543144	0.502009299108698	4.58976127398559e-06	0.263	0.388	t|1e1.1o1|1e2.1o2|1e3.1o1|1e4.1o2|1e5.1o1|1e6.1o1|1e7.1o1	FALSE	FALSE	TRUE	7	8	1	chr3	-	ENSG00000131374.14:t:17508474-17508605_17508605-17742481	17508474	17508605	17508605	17742481			233876	chr3:17508605-17742481	chr3:17508474-17508605	131	2	target	annotated	FALSE
TBC1D5	ENSG00000131374.14	ENSG00000131374.14:t:17508474-17508605	-0.102047023970831	0.498873189738645	4.69036748507179e-06	0.582	0.455	t|1e1.1o1|1e2.1o2|1e3.1o1|1e4.1o2|1e5.1o1|1e6.1o1|1e7.1o1	FALSE	FALSE	TRUE	7	8	1	chr3	-	ENSG00000131374.14:t:17508474-17508605_17508605-17623849	17518902	17518995	17508605	17623849			115244	chr3:17508605-17623849	chr3:17518902-17518995	93	0	target	annotated	FALSE
TBC1D5	ENSG00000131374.14	ENSG00000131374.14:t:17508474-17508605	-0.0109589910689002	0.000447000245043406	0.00288680984751255	0.053	0.038	t|1e1.1o1|1e2.1o2|1e3.1o1|1e4.1o2|1e5.1o1|1e6.1o1|1e7.1o1	FALSE	FALSE	TRUE	7	8	1	chr3	-	ENSG00000131374.14:t:17508474-17508605_17508605-17622648	17547016	17547076	17508605	17622648			114043	chr3:17508605-17622648	chr3:17547016-17547076	60	0	target	annotated	FALSE
TBC1D5	ENSG00000131374.14	ENSG00000131374.14:t:17508474-17508605	0.014460707507815	0.00139357125533707	0.000816475850934021	0.025	0.051	t|1e1.1o1|1e2.1o2|1e3.1o1|1e4.1o2|1e5.1o1|1e6.1o1|1e7.1o1	FALSE	FALSE	TRUE	7	8	1	chr3	-	ENSG00000131374.14:t:17508474-17508605_17508605-17586353	17562019	17562142	17508605	17586353			77748	chr3:17508605-17586353	chr3:17562019-17562142	123	0	target	annotated	FALSE
TBC1D5	ENSG00000131374.14	ENSG00000131374.14:t:17508474-17508605	-0.000943339513107012	6.19054601862221e-07	0.0941034147168715	0.029	0.001	t|1e1.1o1|1e2.1o2|1e3.1o1|1e4.1o2|1e5.1o1|1e6.1o1|1e7.1o1	FALSE	FALSE	TRUE	7	8	1	chr3	-	ENSG00000131374.14:t:17508474-17508605_17508605-17562019	17586352	17586557	17508605	17562019			53414	chr3:17508605-17562019	chr3:17586352-17586557	205	1	target	annotated	FALSE
TBC1D5	ENSG00000131374.14	ENSG00000131374.14:t:17508474-17508605	8.20546118518935e-05	1.68473089701146e-07	0.0351020071446238	0.005	0.013	t|1e1.1o1|1e2.1o2|1e3.1o1|1e4.1o2|1e5.1o1|1e6.1o1|1e7.1o1	FALSE	FALSE	TRUE	7	8	1	chr3	-	ENSG00000131374.14:t:17508474-17508605_17508605-17547016	17622648	17622765	17508605	17547016			38411	chr3:17508605-17547016	chr3:17622648-17622765	117	0	target	annotated	FALSE
TBC1D5	ENSG00000131374.14	ENSG00000131374.14:t:17508474-17508605	0.00783901803191863	0.00111918131431023	0.0010347980925523	0.041	0.051	t|1e1.1o1|1e2.1o2|1e3.1o1|1e4.1o2|1e5.1o1|1e6.1o1|1e7.1o1	FALSE	FALSE	TRUE	7	8	1	chr3	-	ENSG00000131374.14:t:17508474-17508605_17508605-17518902	17623715	17623916	17508605	17518902			10297	chr3:17508605-17518902	chr3:17623715-17623916	201	0	target	annotated	FALSE
DPH6	ENSG00000134146.12	ENSG00000134146.12:s:35538082-35538467	0.125965833830948	0.623830367096125	3.32946054897032e-06	0.042	0.207	s|1e1.1o1|1e2.1o2	FALSE	FALSE	TRUE	2	3	1	chr15	-	ENSG00000134146.12:s:35538082-35538467_35490197-35538274	35454747	35454820	35490197	35538274			48077	chr15:35490197-35538274	chr15:35454747-35454820	73	1	source	annotated	FALSE
DPH6	ENSG00000134146.12	ENSG00000134146.12:s:35538082-35538467	-0.125965875360199	0.623830850093956	3.32963415539123e-06	0.958	0.793	s|1e1.1o1|1e2.1o2	FALSE	FALSE	TRUE	2	3	1	chr15	-	ENSG00000134146.12:s:35538082-35538467_35454820-35538274	35489969	35490197	35454820	35538274			83454	chr15:35454820-35538274	chr15:35489969-35490197	228	0	source	annotated	FALSE
SRPK2	ENSG00000135250.17	ENSG00000135250.17:t:105125782-105125874	-0.26770044364923	0.961808964841427	7.74639065337368e-07	0.369	0.072	t|1e1.1o1|1e2.1o1	FALSE	FALSE	TRUE	2	3	1	chr7	-	ENSG00000135250.17:t:105125782-105125874_105125874-105126993	105125782	105125874	105125874	105126993			1119	chr7:105125874-105126993	chr7:105125782-105125874	92	2	target	annotated	FALSE
SRPK2	ENSG00000135250.17	ENSG00000135250.17:t:105125782-105125874	0.267700392715795	0.961808913009673	7.74606591220412e-07	0.631	0.928	t|1e1.1o1|1e2.1o1	FALSE	FALSE	TRUE	2	3	1	chr7	-	ENSG00000135250.17:t:105125782-105125874_105125874-105126248	105126248	105126340	105125874	105126248			374	chr7:105125874-105126248	chr7:105126248-105126340	92	2	target	annotated	FALSE
MAPKBP1	ENSG00000137802.14	ENSG00000137802.14:s:41812919-41813101	-0.134014858117623	0.749714037254136	9.95134214143434e-07	0.94	0.793	s|1e1.1o1|1e2.1o1	FALSE	FALSE	TRUE	2	3	1	chr15	+	ENSG00000137802.14:s:41812919-41813101_41813101-41813330	41812919	41813101	41813101	41813330			229	chr15:41813101-41813330	chr15:41812919-41813101	182	2	source	annotated	FALSE
MAPKBP1	ENSG00000137802.14	ENSG00000137802.14:s:41812919-41813101	0.134014830559334	0.749713816081426	9.95079984613698e-07	0.06	0.207	s|1e1.1o1|1e2.1o1	FALSE	FALSE	TRUE	2	3	1	chr15	+	ENSG00000137802.14:s:41812919-41813101_41813101-41813621	41813330	41813347	41813101	41813621			520	chr15:41813101-41813621	chr15:41813330-41813347	17	2	source	annotated	FALSE
MAPKBP1	ENSG00000137802.14	ENSG00000137802.14:t:41813621-41813781	0.321445525046006	0.983372997717587	5.44559146533708e-07	0.219	0.562	t|1e1.1o1|1e2.1o1	FALSE	FALSE	TRUE	2	3	1	chr15	+	ENSG00000137802.14:t:41813621-41813781_41813101-41813621	41812919	41813101	41813101	41813621			520	chr15:41813101-41813621	chr15:41812919-41813101	182	2	target	annotated	FALSE
MAPKBP1	ENSG00000137802.14	ENSG00000137802.14:t:41813621-41813781	-0.321445573897812	0.983373006564569	5.44582721362374e-07	0.781	0.438	t|1e1.1o1|1e2.1o1	FALSE	FALSE	TRUE	2	3	1	chr15	+	ENSG00000137802.14:t:41813621-41813781_41813347-41813621	41813330	41813347	41813347	41813621			274	chr15:41813347-41813621	chr15:41813330-41813347	17	2	target	annotated	FALSE
CSAD	ENSG00000139631.18	ENSG00000139631.18:s:53173269-53173499	-0.128250503829425	0.598934635579361	4.16929010482736e-06	0.541	0.354	s|1e1.1o1|1e2.1o1|1e3.4o4	FALSE	FALSE	TRUE	3	4	1	chr12	-	ENSG00000139631.18:s:53173269-53173499_53172648-53173345	53170423	53170890	53172648	53173345			697	chr12:53172648-53173345	chr12:53170423-53170890	467	2	source	annotated	FALSE
CSAD	ENSG00000139631.18	ENSG00000139631.18:s:53173269-53173499	0.045024746008061	0.176108736470502	1.40183535703858e-05	0.152	0.237	s|1e1.1o1|1e2.1o1|1e3.4o4	FALSE	FALSE	TRUE	3	4	1	chr12	-	ENSG00000139631.18:s:53173269-53173499_53171988-53173345	53171878	53171988	53171988	53173345			1357	chr12:53171988-53173345	chr12:53171878-53171988	110	2	source	annotated	FALSE
CSAD	ENSG00000139631.18	ENSG00000139631.18:s:53173269-53173499	0.0499708960671583	0.219427055172991	1.20785692822901e-05	0.308	0.408	s|1e1.1o1|1e2.1o1|1e3.4o4	FALSE	FALSE	TRUE	3	4	1	chr12	-	ENSG00000139631.18:s:53173269-53173499_53170502-53173345	53172522	53172648	53170502	53173345			2843	chr12:53170502-53173345	chr12:53172522-53172648	126	0	source	annotated	FALSE
CSAD	ENSG00000139631.18	ENSG00000139631.18:t:53160763-53160844	-0.114508794711327	0.531694183204783	5.0329402097038e-06	0.842	0.664	t|1e1.2o2|1e2.2o2	FALSE	FALSE	TRUE	2	3	1	chr12	-	ENSG00000139631.18:t:53160763-53160844_53160844-53161273	53160763	53160844	53160844	53161273			429	chr12:53160844-53161273	chr12:53160763-53160844	81	0	target	annotated	FALSE
CSAD	ENSG00000139631.18	ENSG00000139631.18:t:53160763-53160844	0.114508791298395	0.531693962812033	5.03269886819365e-06	0.158	0.336	t|1e1.2o2|1e2.2o2	FALSE	FALSE	TRUE	2	3	1	chr12	-	ENSG00000139631.18:t:53160763-53160844_53160844-53161127	53161127	53161191	53160844	53161127			283	chr12:53160844-53161127	chr12:53161127-53161191	64	1	target	annotated	FALSE
TPM1	ENSG00000140416.21	ENSG00000140416.21:s:63060869-63061098	0.137835774775038	0.788287387090176	7.70934427620911e-06	0.255	0.401	s|1e1.1o2|1e2.1o1|i	FALSE	FALSE	TRUE	3	3	1	chr15	+	ENSG00000140416.21:s:63060869-63061098_63060939-63061198	63060869	63061098	63060939	63061198	63061099	63061197	259	chr15:63060939-63061198	chr15:63060869-63061098	229	1	source	annotated	FALSE
TPM1	ENSG00000140416.21	ENSG00000140416.21:s:63060869-63061098	-0.144196378662799	0.81012749819101	1.0278868343927e-05	0.659	0.506	s|1e1.1o2|1e2.1o1|i	FALSE	FALSE	TRUE	3	3	1	chr15	+	ENSG00000140416.21:s:63060869-63061098_63060939-63061713	63061198	63061273	63060939	63061713			774	chr15:63060939-63061713	chr15:63061198-63061273	75	0	source	annotated	FALSE
TPM1	ENSG00000140416.21	ENSG00000140416.21:s:63060869-63061098	0.00282832599840154	6.45121371772343e-06	0.33222025400194	0.087	0.09	s|1e1.1o2|1e2.1o1|i	FALSE	FALSE	TRUE	3	3	1	chr15	+	ENSG00000140416.21:s:63060869-63061098_63061099-63061197	63061713	63061788	63061099	63061197			98	chr15:63061099-63061197	chr15:63061713-63061788	75	0	source	none	FALSE
POGZ	ENSG00000143442.22	ENSG00000143442.22:t:151442081-151442205	0.126717074036811	0.687076557653598	1.94481072245134e-06	0.697	0.837	t|1e1.1o1|1e2.1o1|1e3.1o1|1e4.1o1	FALSE	FALSE	TRUE	4	5	1	chr1	-	ENSG00000143442.22:t:151442081-151442205_151442205-151459152	151442081	151442205	151442205	151459152			16947	chr1:151442205-151459152	chr1:151442081-151442205	124	1	target	annotated	FALSE
POGZ	ENSG00000143442.22	ENSG00000143442.22:t:151442081-151442205	-0.0802982634580226	0.336869800439028	7.39895066936835e-06	0.202	0.101	t|1e1.1o1|1e2.1o1|1e3.1o1|1e4.1o1	FALSE	FALSE	TRUE	4	5	1	chr1	-	ENSG00000143442.22:t:151442081-151442205_151442205-151454962	151442305	151442478	151442205	151454962			12757	chr1:151442205-151454962	chr1:151442305-151442478	173	2	target	annotated	FALSE
POGZ	ENSG00000143442.22	ENSG00000143442.22:t:151442081-151442205	0.0109776917540997	0.000540689583352907	0.00180864609176528	0.031	0.049	t|1e1.1o1|1e2.1o1|1e3.1o1|1e4.1o1	FALSE	FALSE	TRUE	4	5	1	chr1	-	ENSG00000143442.22:t:151442081-151442205_151442205-151450910	151450910	151451047	151442205	151450910			8705	chr1:151442205-151450910	chr1:151450910-151451047	137	2	target	annotated	FALSE
POGZ	ENSG00000143442.22	ENSG00000143442.22:t:151442081-151442205	-0.0442801694462999	0.0117019527975874	0.000276982191401154	0.073	0.012	t|1e1.1o1|1e2.1o1|1e3.1o1|1e4.1o1	FALSE	FALSE	TRUE	4	5	1	chr1	-	ENSG00000143442.22:t:151442081-151442205_151442205-151442305	151454962	151455197	151442205	151442305			100	chr1:151442205-151442305	chr1:151454962-151455197	235	1	target	annotated	FALSE
RETREG2	ENSG00000144567.11	ENSG00000144567.11:t:219182013-219182308	7.77155985295739e-16	7.29950855916768e-21	0.999999999007135	0.006	0.013	t|1e1.1o1|1e2.2o3|i	FALSE	FALSE	TRUE	3	3	0	chr2	+	ENSG00000144567.11:t:219182013-219182308_219181463-219182013	219181369	219181463	219181463	219182013	219181835	219182012	550	chr2:219181463-219182013	chr2:219181369-219181463	94	1	target	novel_exon_skip	FALSE
RETREG2	ENSG00000144567.11	ENSG00000144567.11:t:219182013-219182308	0.118837544754333	0.667748495069716	1.4622503746257e-05	0.793	0.913	t|1e1.1o1|1e2.2o3|i	FALSE	FALSE	TRUE	3	3	1	chr2	+	ENSG00000144567.11:t:219182013-219182308_219181775-219182013	219181678	219181834	219181775	219182013			238	chr2:219181775-219182013	chr2:219181678-219181834	156	0	target	annotated	FALSE
RETREG2	ENSG00000144567.11	ENSG00000144567.11:t:219182013-219182308	-0.125344870009053	0.711407190062891	7.77716857791599e-06	0.201	0.074	t|1e1.1o1|1e2.2o3|i	FALSE	FALSE	TRUE	3	3	0	chr2	+	ENSG00000144567.11:t:219182013-219182308_219181835-219182012	219182013	219182308	219181835	219182012			177	chr2:219181835-219182012	chr2:219182013-219182308	295	1	target	none	FALSE
DGKQ	ENSG00000145214.14	ENSG00000145214.14:s:966466-966527	0.107131341469148	0.554094830596409	3.28971612366354e-06	0.044	0.161	s|1e1.1o2|1e1.2o2	FALSE	TRUE	FALSE	2	2	1	chr4	-	ENSG00000145214.14:s:966466-966527_966301-966466	965928	966301	966301	966466			165	chr4:966301-966466	chr4:965928-966301	373	1	source	annotated	FALSE
DGKQ	ENSG00000145214.14	ENSG00000145214.14:s:966466-966527	-0.107131436595605	0.554095628443833	3.28990176468036e-06	0.956	0.839	s|1e1.1o2|1e1.2o2	FALSE	TRUE	FALSE	2	2	1	chr4	-	ENSG00000145214.14:s:966466-966527_966078-966466	966466	966527	966078	966466			388	chr4:966078-966466	chr4:966466-966527	61	1	source	annotated	FALSE
CEP78	ENSG00000148019.13	ENSG00000148019.13:s:78248762-78248873	0.03454400836065	0.14719140020695	1.63448330590191e-05	0.559	0.63	s|1e1.1o1|1e2.1o2|1e2.2o2	FALSE	TRUE	TRUE	3	3	1	chr9	+	ENSG00000148019.13:s:78248762-78248873_78248873-78250246	78248762	78248873	78248873	78250246			1373	chr9:78248873-78250246	chr9:78248762-78248873	111	0	source	annotated	FALSE
CEP78	ENSG00000148019.13	ENSG00000148019.13:s:78248762-78248873	0.0505597039316882	0.172423368956629	1.42666455231776e-05	0.083	0.166	s|1e1.1o1|1e2.1o2|1e2.2o2	FALSE	TRUE	TRUE	3	3	1	chr9	+	ENSG00000148019.13:s:78248762-78248873_78248873-78251905	78250246	78250453	78248873	78251905			3032	chr9:78248873-78251905	chr9:78250246-78250453	207	0	source	annotated	FALSE
CEP78	ENSG00000148019.13	ENSG00000148019.13:s:78248762-78248873	-0.112534442128148	0.551538632823109	4.25962672767621e-06	0.358	0.202	s|1e1.1o1|1e2.1o2|1e2.2o2	FALSE	TRUE	TRUE	3	3	1	chr9	+	ENSG00000148019.13:s:78248762-78248873_78248873-78251908	78251905	78252043	78248873	78251908			3035	chr9:78248873-78251908	chr9:78251905-78252043	138	0	source	annotated	FALSE
IMMP1L	ENSG00000148950.11	ENSG00000148950.11:s:31463172-31463305	0.1032806243624	0.506031711139017	4.64684613629875e-06	0.429	0.565	s|1e1.1o1|1e2.1o2|1e3.2o2	FALSE	FALSE	TRUE	3	4	1	chr11	-	ENSG00000148950.11:s:31463172-31463305_31460714-31463172	31433460	31433755	31460714	31463172			2458	chr11:31460714-31463172	chr11:31433460-31433755	295	1	source	annotated	FALSE
IMMP1L	ENSG00000148950.11	ENSG00000148950.11:s:31463172-31463305	-0.0349407630534048	0.0462807899336886	4.55170175711617e-05	0.09	0.041	s|1e1.1o1|1e2.1o2|1e3.2o2	FALSE	FALSE	TRUE	3	4	1	chr11	-	ENSG00000148950.11:s:31463172-31463305_31456386-31463172	31456260	31456386	31456386	31463172			6786	chr11:31456386-31463172	chr11:31456260-31456386	126	0	source	annotated	FALSE
IMMP1L	ENSG00000148950.11	ENSG00000148950.11:s:31463172-31463305	-0.053146136318415	0.21019414119771	1.17561592604121e-05	0.478	0.396	s|1e1.1o1|1e2.1o2|1e3.2o2	FALSE	FALSE	TRUE	3	4	1	chr11	-	ENSG00000148950.11:s:31463172-31463305_31433570-31463172	31460626	31460714	31433570	31463172			29602	chr11:31433570-31463172	chr11:31460626-31460714	88	1	source	annotated	FALSE
IMMP1L	ENSG00000148950.11	ENSG00000148950.11:t:31460626-31460714	0.118729250022961	0.619485029360619	2.9013549764063e-06	0.052	0.193	t|1e1.1o2|1e2.1o1	FALSE	FALSE	TRUE	2	3	0	chr11	-	ENSG00000148950.11:t:31460626-31460714_31460714-31509519	31460626	31460714	31460714	31509519			48805	chr11:31460714-31509519	chr11:31460626-31460714	88	1	target	novel_exon_skip	FALSE
IMMP1L	ENSG00000148950.11	ENSG00000148950.11:t:31460626-31460714	-0.118729269195474	0.619485446993708	2.90151498927305e-06	0.948	0.807	t|1e1.1o2|1e2.1o1	FALSE	FALSE	TRUE	2	3	1	chr11	-	ENSG00000148950.11:t:31460626-31460714_31460714-31463172	31463172	31463305	31460714	31463172			2458	chr11:31460714-31463172	chr11:31463172-31463305	133	1	target	annotated	FALSE
NEK7	ENSG00000151414.15	ENSG00000151414.15:t:198319412-198322420	0.230172708535192	0.981681901084438	1.18909479558941e-07	0.027	0.276	t|1e1.1o1|1e2.1o1	FALSE	FALSE	TRUE	2	3	0	chr1	+	ENSG00000151414.15:t:198319412-198322420_198264235-198319412	198264125	198264235	198264235	198319412			55177	chr1:198264235-198319412	chr1:198264125-198264235	110	2	target	novel_exon_skip	TRUE
NEK7	ENSG00000151414.15	ENSG00000151414.15:t:198319412-198322420	-0.230172737329532	0.981681987065838	1.18915473024117e-07	0.973	0.724	t|1e1.1o1|1e2.1o1	FALSE	FALSE	TRUE	2	3	1	chr1	+	ENSG00000151414.15:t:198319412-198322420_198297240-198319412	198297127	198297240	198297240	198319412			22172	chr1:198297240-198319412	chr1:198297127-198297240	113	2	target	annotated	FALSE
RETREG1	ENSG00000154153.13	ENSG00000154153.13:s:16481009-16481093	-0.163767418593867	0.854181550588796	8.24898741669244e-06	0.968	0.784	s|1e1.1o1|i	FALSE	FALSE	FALSE	2	2	1	chr5	-	ENSG00000154153.13:s:16481009-16481093_16478987-16481009	16478850	16478987	16478987	16481009	16478988	16481008	2022	chr5:16478987-16481009	chr5:16478850-16478987	137	2	source	annotated	FALSE
RETREG1	ENSG00000154153.13	ENSG00000154153.13:s:16481009-16481093	0.163767402354139	0.854181217493629	8.24834392879505e-06	0.032	0.216	s|1e1.1o1|i	FALSE	FALSE	FALSE	2	2	0	chr5	-	ENSG00000154153.13:s:16481009-16481093_16478988-16481008	16481009	16481093	16478988	16481008			2020	chr5:16478988-16481008	chr5:16481009-16481093	84	0	source	none	TRUE
GRIP1	ENSG00000155974.12	ENSG00000155974.12:t:66596847-66596927	0.049501629523015	0.134649251647679	1.57187391661112e-05	0.094	0.161	t|1e1.1o1|1e2.1o1|1e3.1o1|1e4.1o1	FALSE	FALSE	TRUE	4	5	1	chr12	-	ENSG00000155974.12:t:66596847-66596927_66596927-67069050	66596847	66596927	66596927	67069050			472123	chr12:66596927-67069050	chr12:66596847-66596927	80	2	target	annotated	FALSE
GRIP1	ENSG00000155974.12	ENSG00000155974.12:t:66596847-66596927	0.05025561776355	0.159442321000327	1.45709712169085e-05	0.298	0.374	t|1e1.1o1|1e2.1o1|1e3.1o1|1e4.1o1	FALSE	FALSE	TRUE	4	5	1	chr12	-	ENSG00000155974.12:t:66596847-66596927_66596927-66804053	66678850	66679145	66596927	66804053			207126	chr12:66596927-66804053	chr12:66678850-66679145	295	1	target	annotated	FALSE
GRIP1	ENSG00000155974.12	ENSG00000155974.12:t:66596847-66596927	5.59153069341509e-06	8.56672234092798e-21	0.50428416886445	0.008	0.012	t|1e1.1o1|1e2.1o1|1e3.1o1|1e4.1o1	FALSE	FALSE	TRUE	4	5	1	chr12	-	ENSG00000155974.12:t:66596847-66596927_66596927-66803932	66803932	66803980	66596927	66803932			207005	chr12:66596927-66803932	chr12:66803932-66803980	48	0	target	annotated	FALSE
GRIP1	ENSG00000155974.12	ENSG00000155974.12:t:66596847-66596927	-0.130707142121646	0.706504194182285	1.8900062848104e-06	0.599	0.452	t|1e1.1o1|1e2.1o1|1e3.1o1|1e4.1o1	FALSE	FALSE	TRUE	4	5	1	chr12	-	ENSG00000155974.12:t:66596847-66596927_66596927-66678850	66804053	66804186	66596927	66678850			81923	chr12:66596927-66678850	chr12:66804053-66804186	133	1	target	annotated	FALSE
DHRS4	ENSG00000157326.19	ENSG00000157326.19:t:23967211-23967266	0.164393586944553	0.768103107063457	2.2841779458529e-06	0.15	0.359	t|1e1.1o1|1e2.1o1|1e3.1o1|1e4.1o1	FALSE	FALSE	TRUE	4	5	1	chr14	+	ENSG00000157326.19:t:23967211-23967266_23955212-23967211	23955035	23955212	23955212	23967211			11999	chr14:23955212-23967211	chr14:23955035-23955212	177	0	target	annotated	FALSE
DHRS4	ENSG00000157326.19	ENSG00000157326.19:t:23967211-23967266	-0.107195394343126	0.507341046862675	5.19955837841035e-06	0.395	0.234	t|1e1.1o1|1e2.1o1|1e3.1o1|1e4.1o1	FALSE	FALSE	TRUE	4	5	1	chr14	+	ENSG00000157326.19:t:23967211-23967266_23960003-23967211	23959902	23960003	23960003	23967211			7208	chr14:23960003-23967211	chr14:23959902-23960003	101	2	target	annotated	FALSE
DHRS4	ENSG00000157326.19	ENSG00000157326.19:t:23967211-23967266	-0.00993814316449615	0.00278719547943525	0.000352626083125029	0.049	0.022	t|1e1.1o1|1e2.1o1|1e3.1o1|1e4.1o1	FALSE	FALSE	TRUE	4	5	1	chr14	+	ENSG00000157326.19:t:23967211-23967266_23965983-23967211	23965932	23965983	23965983	23967211			1228	chr14:23965983-23967211	chr14:23965932-23965983	51	0	target	annotated	FALSE
DHRS4	ENSG00000157326.19	ENSG00000157326.19:t:23967211-23967266	-0.00797465810272835	0.0926791648395202	2.3433797546657e-05	0.406	0.384	t|1e1.1o1|1e2.1o1|1e3.1o1|1e4.1o1	FALSE	FALSE	TRUE	4	5	1	chr14	+	ENSG00000157326.19:t:23967211-23967266_23966417-23967211	23966283	23966417	23966417	23967211			794	chr14:23966417-23967211	chr14:23966283-23966417	134	2	target	annotated	FALSE
EMSY	ENSG00000158636.16	ENSG00000158636.16:s:76453314-76453931	-0.103666180867801	0.53194373361087	3.23754356656991e-06	0.155	0.036	s|1e1.1o1|1e2.2o2	FALSE	FALSE	TRUE	2	3	1	chr11	+	ENSG00000158636.16:s:76453314-76453931_76453388-76454749	76453314	76453931	76453388	76454749			1361	chr11:76453388-76454749	chr11:76453314-76453931	617	2	source	annotated	FALSE
EMSY	ENSG00000158636.16	ENSG00000158636.16:s:76453314-76453931	0.103666200848644	0.531943803233147	3.23734822523e-06	0.845	0.964	s|1e1.1o1|1e2.2o2	FALSE	FALSE	TRUE	2	3	1	chr11	+	ENSG00000158636.16:s:76453314-76453931_76453388-76458183	76454749	76454790	76453388	76458183			4795	chr11:76453388-76458183	chr11:76454749-76454790	41	2	source	annotated	FALSE
EMSY	ENSG00000158636.16	ENSG00000158636.16:s:76537795-76537950	0.24968546967335	0.974111846015106	3.58069786314532e-07	0.431	0.705	s|1e1.1o1|1e2.3o4	FALSE	FALSE	TRUE	2	3	1	chr11	+	ENSG00000158636.16:s:76537795-76537950_76537950-76539599	76537795	76537950	76537950	76539599			1649	chr11:76537950-76539599	chr11:76537795-76537950	155	2	source	annotated	FALSE
EMSY	ENSG00000158636.16	ENSG00000158636.16:s:76537795-76537950	-0.249685452559229	0.974111889654552	3.5808488663136e-07	0.569	0.295	s|1e1.1o1|1e2.3o4	FALSE	FALSE	TRUE	2	3	1	chr11	+	ENSG00000158636.16:s:76537795-76537950_76537950-76542216	76539599	76539640	76537950	76542216			4266	chr11:76537950-76542216	chr11:76539599-76539640	41	2	source	annotated	FALSE
EMSY	ENSG00000158636.16	ENSG00000158636.16:t:76542051-76542367	0.0368118000850027	0.127696645626944	1.77337617902132e-05	0.205	0.275	t|1e1.1o1|1e2.1o1|1e3.1o1	FALSE	FALSE	TRUE	3	4	1	chr11	+	ENSG00000158636.16:t:76542051-76542367_76528466-76542216	76528268	76528466	76528466	76542216			13750	chr11:76528466-76542216	chr11:76528268-76528466	198	0	target	annotated	FALSE
EMSY	ENSG00000158636.16	ENSG00000158636.16:t:76542051-76542367	-0.224605076043926	0.941841382641192	6.97502905988578e-07	0.582	0.326	t|1e1.1o1|1e2.1o1|1e3.1o1	FALSE	FALSE	TRUE	3	4	1	chr11	+	ENSG00000158636.16:t:76542051-76542367_76537950-76542216	76537795	76537950	76537950	76542216			4266	chr11:76537950-76542216	chr11:76537795-76537950	155	2	target	annotated	FALSE
EMSY	ENSG00000158636.16	ENSG00000158636.16:t:76542051-76542367	0.148325143176203	0.730393075644691	2.40528204161844e-06	0.213	0.396	t|1e1.1o1|1e2.1o1|1e3.1o1	FALSE	FALSE	TRUE	3	4	1	chr11	+	ENSG00000158636.16:t:76542051-76542367_76539640-76542216	76539599	76539640	76539640	76542216			2576	chr11:76539640-76542216	chr11:76539599-76539640	41	2	target	annotated	FALSE
NDUFV3	ENSG00000160194.18	ENSG00000160194.18:s:42903182-42904276	-0.113887843186893	0.585108300747277	3.50579324577272e-05	0.846	0.705	s|1e1.1o1|1e2.1o3|i	FALSE	FALSE	TRUE	3	3	0	chr21	+	ENSG00000160194.18:s:42903182-42904276_42904276-42906840	42903182	42904276	42904276	42906840	42904277	42906839	2564	chr21:42904276-42906840	chr21:42903182-42904276	1094	2	source	novel_acceptor	FALSE
NDUFV3	ENSG00000160194.18	ENSG00000160194.18:s:42903182-42904276	0.0266676523561785	0.0151493118386244	0.00163521350558822	0.015	0.066	s|1e1.1o1|1e2.1o3|i	FALSE	FALSE	TRUE	3	3	1	chr21	+	ENSG00000160194.18:s:42903182-42904276_42904276-42908864	42906840	42906902	42904276	42908864			4588	chr21:42904276-42908864	chr21:42906840-42906902	62	2	source	annotated	FALSE
NDUFV3	ENSG00000160194.18	ENSG00000160194.18:s:42903182-42904276	0.05742022286218	0.228555827283647	0.000120086539502166	0.139	0.229	s|1e1.1o1|1e2.1o3|i	FALSE	FALSE	TRUE	3	3	0	chr21	+	ENSG00000160194.18:s:42903182-42904276_42904277-42906839	42908864	42913304	42904277	42906839			2562	chr21:42904277-42906839	chr21:42908864-42913304	4440	0	source	none	FALSE
NDUFV3	ENSG00000160194.18	ENSG00000160194.18:t:42908864-42913304	-0.00935629812570641	1.21351520175702e-20	0.475006920234379	0.051	0.045	t|1e1.1o1|1e2.1o1|1e3.2o2|1e4.1o1	FALSE	FALSE	TRUE	4	5	0	chr21	+	ENSG00000160194.18:t:42908864-42913304_42893381-42908864	42893268	42893381	42893381	42908864			15483	chr21:42893381-42908864	chr21:42893268-42893381	113	2	target	novel_exon_skip	FALSE
NDUFV3	ENSG00000160194.18	ENSG00000160194.18:t:42908864-42913304	0.106185362562219	0.559207368536523	2.47951771497715e-06	0.433	0.546	t|1e1.1o1|1e2.1o1|1e3.2o2|1e4.1o1	FALSE	FALSE	TRUE	4	5	1	chr21	+	ENSG00000160194.18:t:42908864-42913304_42897047-42908864	42896927	42897047	42897047	42908864			11817	chr21:42897047-42908864	chr21:42896927-42897047	120	0	target	annotated	FALSE
NDUFV3	ENSG00000160194.18	ENSG00000160194.18:t:42908864-42913304	7.77155965710684e-16	8.56558349536148e-21	0.999999999943745	0.001	0.006	t|1e1.1o1|1e2.1o1|1e3.2o2|1e4.1o1	FALSE	FALSE	TRUE	4	5	1	chr21	+	ENSG00000160194.18:t:42908864-42913304_42904276-42908864	42903182	42904276	42904276	42908864			4588	chr21:42904276-42908864	chr21:42903182-42904276	1094	2	target	annotated	FALSE
NDUFV3	ENSG00000160194.18	ENSG00000160194.18:t:42908864-42913304	-0.106089031728932	0.559980419082058	2.5206328819749e-06	0.512	0.403	t|1e1.1o1|1e2.1o1|1e3.2o2|1e4.1o1	FALSE	FALSE	TRUE	4	5	0	chr21	+	ENSG00000160194.18:t:42908864-42913304_42906902-42908864	42906840	42906902	42906902	42908864			1962	chr21:42906902-42908864	chr21:42906840-42906902	62	2	target	novel_donor	FALSE
ZNF382	ENSG00000161298.18	ENSG00000161298.18:s:36604817-36605730	0.316710121550652	0.998140027072745	3.15269109300615e-07	0.044	0.372	s|1e1.1o1|2e1.1o1|3e1.1o1|4e1.1o1|i	TRUE	FALSE	FALSE	5	2	1	chr19	+	ENSG00000161298.18:s:36604817-36605730_36605347-36607552	36604817	36605730	36605347	36607552	36605731	36607551	2205	chr19:36605347-36607552	chr19:36604817-36605730	913	1	source	annotated	FALSE
ZNF382	ENSG00000161298.18	ENSG00000161298.18:s:36604817-36605730	0.156110906357519	0.879740013987888	2.65971514123466e-06	0.004	0.191	s|1e1.1o1|2e1.1o1|3e1.1o1|4e1.1o1|i	TRUE	FALSE	FALSE	5	2	1	chr19	+	ENSG00000161298.18:s:36604817-36605730_36605446-36607552	36607552	36608092	36605446	36607552			2106	chr19:36605446-36607552	chr19:36607552-36608092	540	0	source	annotated	FALSE
ZNF382	ENSG00000161298.18	ENSG00000161298.18:s:36604817-36605730	0.147692227215234	0.837237317469959	4.7244059805166e-06	0.004	0.183	s|1e1.1o1|2e1.1o1|3e1.1o1|4e1.1o1|i	TRUE	FALSE	FALSE	5	2	0	chr19	+	ENSG00000161298.18:s:36604817-36605730_36605521-36607552			36605521	36607552			2031	chr19:36605521-36607552	chr19:NA-NA			source	novel_donor	TRUE
ZNF382	ENSG00000161298.18	ENSG00000161298.18:s:36604817-36605730	-0.840145118931725	1	2.8986035793821e-11	0.944	0.127	s|1e1.1o1|2e1.1o1|3e1.1o1|4e1.1o1|i	TRUE	FALSE	FALSE	5	2	1	chr19	+	ENSG00000161298.18:s:36604817-36605730_36605730-36607552			36605730	36607552			1822	chr19:36605730-36607552	chr19:NA-NA			source	annotated	FALSE
ZNF382	ENSG00000161298.18	ENSG00000161298.18:s:36604817-36605730	0.0919611540322322	0.421419878807718	6.04432452244161e-05	0.004	0.132	s|1e1.1o1|2e1.1o1|3e1.1o1|4e1.1o1|i	TRUE	FALSE	FALSE	5	2	0	chr19	+	ENSG00000161298.18:s:36604817-36605730_36605731-36607551			36605731	36607551			1820	chr19:36605731-36607551	chr19:NA-NA			source	none	FALSE
APBB2	ENSG00000163697.17	ENSG00000163697.17:t:40934614-40934699	0.0966014214059933	0.477598225141876	4.32169302621607e-05	0.186	0.293	t|1e1.1o1|1e2.1o1|i	FALSE	FALSE	TRUE	3	3	1	chr4	-	ENSG00000163697.17:t:40934614-40934699_40934699-40944865	40934614	40934699	40934699	40944865	40934700	40935076	10166	chr4:40934699-40944865	chr4:40934614-40934699	85	1	target	annotated	FALSE
APBB2	ENSG00000163697.17	ENSG00000163697.17:t:40934614-40934699	-0.107814920519122	0.568686298235495	3.0508468979229e-05	0.646	0.528	t|1e1.1o1|1e2.1o1|i	FALSE	FALSE	TRUE	3	3	1	chr4	-	ENSG00000163697.17:t:40934614-40934699_40934699-40935077	40935077	40935626	40934699	40935077			378	chr4:40934699-40935077	chr4:40935077-40935626	549	0	target	annotated	FALSE
APBB2	ENSG00000163697.17	ENSG00000163697.17:t:40934614-40934699	0.00749095298128433	0.00161787679446718	0.00722927119152099	0.166	0.173	t|1e1.1o1|1e2.1o1|i	FALSE	FALSE	TRUE	3	3	1	chr4	-	ENSG00000163697.17:t:40934614-40934699_40934700-40935076	40944865	40945073	40934700	40935076			376	chr4:40934700-40935076	chr4:40944865-40945073	208	1	target	none	FALSE
PLXNB1	ENSG00000164050.13	ENSG00000164050.13:s:48419577-48419744	0.100750635253265	0.513702078088872	3.43698607783454e-05	0.089	0.196	s|1e1.1o1|2e1.1o1|i	TRUE	FALSE	FALSE	3	2	0	chr3	-	ENSG00000164050.13:s:48419577-48419744_48419366-48419675	48419244	48419366	48419366	48419675	48419367	48419576	309	chr3:48419366-48419675	chr3:48419244-48419366	122	2	source	novel_donor	FALSE
PLXNB1	ENSG00000164050.13	ENSG00000164050.13:s:48419577-48419744	-0.0980938884575265	0.485669226274996	4.92402896928867e-05	0.603	0.482	s|1e1.1o1|2e1.1o1|i	TRUE	FALSE	FALSE	3	2	1	chr3	-	ENSG00000164050.13:s:48419577-48419744_48419366-48419577	48419577	48419744	48419366	48419577			211	chr3:48419366-48419577	chr3:48419577-48419744	167	2	source	annotated	FALSE
PLXNB1	ENSG00000164050.13	ENSG00000164050.13:s:48419577-48419744	0.00476815138281913	0.0173763042819466	0.000863654701398764	0.307	0.323	s|1e1.1o1|2e1.1o1|i	TRUE	FALSE	FALSE	3	2	1	chr3	-	ENSG00000164050.13:s:48419577-48419744_48419367-48419576			48419367	48419576			209	chr3:48419367-48419576	chr3:NA-NA			source	none	FALSE
NLGN4Y	ENSG00000165246.14	ENSG00000165246.14:s:14622009-14622591	0.134410851476026	0.6533839499424	3.26901147151078e-06	0.518	0.692	s|1e1.1o1|1e2.1o1	FALSE	FALSE	TRUE	2	3	1	chrY	+	ENSG00000165246.14:s:14622009-14622591_14622591-14719459	14622009	14622591	14622591	14719459			96868	chrY:14622591-14719459	chrY:14622009-14622591	582	0	source	annotated	FALSE
NLGN4Y	ENSG00000165246.14	ENSG00000165246.14:s:14622009-14622591	-0.134410871630533	0.653384189204342	3.2691753578673e-06	0.482	0.308	s|1e1.1o1|1e2.1o1	FALSE	FALSE	TRUE	2	3	1	chrY	+	ENSG00000165246.14:s:14622009-14622591_14622591-14723117	14719459	14719518	14622591	14723117			100526	chrY:14622591-14723117	chrY:14719459-14719518	59	2	source	annotated	FALSE
NLGN4Y	ENSG00000165246.14	ENSG00000165246.14:t:14723117-14723269	-0.171272892646708	0.84806214664237	1.25925436789132e-06	0.411	0.219	t|1e1.4o4|1e2.1o1	FALSE	FALSE	TRUE	2	3	1	chrY	+	ENSG00000165246.14:t:14723117-14723269_14622591-14723117	14622009	14622591	14622591	14723117			100526	chrY:14622591-14723117	chrY:14622009-14622591	582	0	target	annotated	FALSE
NLGN4Y	ENSG00000165246.14	ENSG00000165246.14:t:14723117-14723269	0.17127290657131	0.848062198364361	1.25919195870974e-06	0.589	0.781	t|1e1.4o4|1e2.1o1	FALSE	FALSE	TRUE	2	3	1	chrY	+	ENSG00000165246.14:t:14723117-14723269_14719518-14723117	14719459	14719518	14719518	14723117			3599	chrY:14719518-14723117	chrY:14719459-14719518	59	2	target	annotated	FALSE
CCDC186	ENSG00000165813.20	ENSG00000165813.20:s:114174015-114174232	0.181232697107522	0.817622804591487	1.93104360071534e-06	0.239	0.459	s|1e1.1o1|1e2.1o1	FALSE	FALSE	TRUE	2	3	1	chr10	-	ENSG00000165813.20:s:114174015-114174232_114173265-114174015	114161608	114163329	114173265	114174015			750	chr10:114173265-114174015	chr10:114161608-114163329	1721	2	source	annotated	FALSE
CCDC186	ENSG00000165813.20	ENSG00000165813.20:s:114174015-114174232	-0.181232717467852	0.817622984922673	1.93113563518033e-06	0.761	0.541	s|1e1.1o1|1e2.1o1	FALSE	FALSE	TRUE	2	3	1	chr10	-	ENSG00000165813.20:s:114174015-114174232_114163329-114174015	114173141	114173265	114163329	114174015			10686	chr10:114163329-114174015	chr10:114173141-114173265	124	1	source	annotated	FALSE
CCDC186	ENSG00000165813.20	ENSG00000165813.20:t:114161608-114163329	-0.113321952212359	0.539398439543355	4.69614060449874e-06	0.761	0.595	t|1e1.1o1|1e2.1o1	FALSE	FALSE	TRUE	2	3	1	chr10	-	ENSG00000165813.20:t:114161608-114163329_114163329-114174015	114161608	114163329	114163329	114174015			10686	chr10:114163329-114174015	chr10:114161608-114163329	1721	2	target	annotated	FALSE
CCDC186	ENSG00000165813.20	ENSG00000165813.20:t:114161608-114163329	0.113321916804245	0.539398007951386	4.69591051895221e-06	0.239	0.405	t|1e1.1o1|1e2.1o1	FALSE	FALSE	TRUE	2	3	1	chr10	-	ENSG00000165813.20:t:114161608-114163329_114163329-114173141	114173141	114173265	114163329	114173141			9812	chr10:114163329-114173141	chr10:114173141-114173265	124	1	target	annotated	FALSE
ZNF143	ENSG00000166478.10	ENSG00000166478.10:t:9471107-9471420	0.0188210998911402	0.0044440236942601	0.000317391977263074	0.017	0.055	t|1e1.1o1|1e2.1o1|1e3.1o1|1e4.1o1|2e5.1o1	FALSE	TRUE	TRUE	5	6	1	chr11	+	ENSG00000166478.10:t:9471107-9471420_9460458-9471302	9460319	9460458	9460458	9471302			10844	chr11:9460458-9471302	chr11:9460319-9460458	139	1	target	annotated	FALSE
ZNF143	ENSG00000166478.10	ENSG00000166478.10:t:9471107-9471420	-0.103486809765319	0.523106139016704	3.69227696739305e-06	0.917	0.796	t|1e1.1o1|1e2.1o1|1e3.1o1|1e4.1o1|2e5.1o1	FALSE	TRUE	TRUE	5	6	1	chr11	+	ENSG00000166478.10:t:9471107-9471420_9461076-9471302	9460976	9461076	9461076	9471302			10226	chr11:9461076-9471302	chr11:9460976-9461076	100	1	target	annotated	FALSE
ZNF143	ENSG00000166478.10	ENSG00000166478.10:t:9471107-9471420	-0.000396590738287652	7.3417578361083e-07	0.038493182307085	0.022	0.002	t|1e1.1o1|1e2.1o1|1e3.1o1|1e4.1o1|2e5.1o1	FALSE	TRUE	TRUE	5	6	1	chr11	+	ENSG00000166478.10:t:9471107-9471420_9461940-9471302	9461648	9461940	9461940	9471302			9362	chr11:9461940-9471302	chr11:9461648-9461940	292	1	target	annotated	FALSE
ZNF143	ENSG00000166478.10	ENSG00000166478.10:t:9471107-9471420	0.00529176220884538	0.000429222561893148	0.00126548660787352	0.027	0.04	t|1e1.1o1|1e2.1o1|1e3.1o1|1e4.1o1|2e5.1o1	FALSE	TRUE	TRUE	5	6	1	chr11	+	ENSG00000166478.10:t:9471107-9471420_9462040-9471302	9462002	9462040	9462040	9471302			9262	chr11:9462040-9471302	chr11:9462002-9462040	38	2	target	annotated	FALSE
ZNF143	ENSG00000166478.10	ENSG00000166478.10:t:9471107-9471420	0.0719242585835828	0.229908799581805	1.17473273711762e-05	0.017	0.108	t|1e1.1o1|1e2.1o1|1e3.1o1|1e4.1o1|2e5.1o1	FALSE	TRUE	TRUE	5	6	1	chr11	+	ENSG00000166478.10:t:9471107-9471420_9461076-9471306	9471107	9471420	9461076	9471306			10230	chr11:9461076-9471306	chr11:9471107-9471420	313	1	target	annotated	FALSE
TCTN2	ENSG00000168778.12	ENSG00000168778.12:s:123672056-123672132	0.13140230025682	0.691001918400217	2.30846807647264e-06	0.744	0.9	s|1e1.1o2|1e1.2o2	FALSE	TRUE	FALSE	2	2	1	chr12	+	ENSG00000168778.12:s:123672056-123672132_123672132-123673615	123672056	123672132	123672132	123673615			1483	chr12:123672132-123673615	chr12:123672056-123672132	76	1	source	annotated	FALSE
TCTN2	ENSG00000168778.12	ENSG00000168778.12:s:123672056-123672132	-0.131402340839649	0.691002257111261	2.30859062966271e-06	0.256	0.1	s|1e1.1o2|1e1.2o2	FALSE	TRUE	FALSE	2	2	1	chr12	+	ENSG00000168778.12:s:123672056-123672132_123672132-123673618	123673615	123673810	123672132	123673618			1486	chr12:123672132-123673618	chr12:123673615-123673810	195	0	source	annotated	FALSE
ZNF131	ENSG00000172262.11	ENSG00000172262.11:s:43065176-43065233	-0.133746882721843	0.69688809105638	2.24775040261749e-05	0.235	0.073	s|1e1.1o4|i	FALSE	FALSE	FALSE	2	2	1	chr5	+	ENSG00000172262.11:s:43065176-43065233_43065233-43067970	43065176	43065233	43065233	43067970	43065234	43067580	2737	chr5:43065233-43067970	chr5:43065176-43065233	57	0	source	annotated	FALSE
ZNF131	ENSG00000172262.11	ENSG00000172262.11:s:43065176-43065233	0.133746824238577	0.696887683299967	2.24757434335844e-05	0.765	0.927	s|1e1.1o4|i	FALSE	FALSE	FALSE	2	2	0	chr5	+	ENSG00000172262.11:s:43065176-43065233_43065234-43067580	43067970	43068217	43065234	43067580			2346	chr5:43065234-43067580	chr5:43067970-43068217	247	1	source	none	FALSE
KCTD13	ENSG00000174943.11	ENSG00000174943.11:s:29923190-29923237	0.00985141605147465	0.000327375715946987	0.02862602715081	0.022	0.048	s|1e1.1o1|1e2.2o2|i	FALSE	FALSE	TRUE	3	3	1	chr16	-	ENSG00000174943.11:s:29923190-29923237_29921961-29923190	29911960	29912370	29921961	29923190	29921962	29923189	1229	chr16:29921961-29923190	chr16:29911960-29912370	410	2	source	annotated	FALSE
KCTD13	ENSG00000174943.11	ENSG00000174943.11:s:29923190-29923237	-0.116387012619794	0.616264806563171	2.69880450181059e-05	0.892	0.765	s|1e1.1o1|1e2.2o2|i	FALSE	FALSE	TRUE	3	3	1	chr16	-	ENSG00000174943.11:s:29923190-29923237_29912049-29923190	29919635	29921961	29912049	29923190			11141	chr16:29912049-29923190	chr16:29919635-29921961	2326	1	source	annotated	FALSE
KCTD13	ENSG00000174943.11	ENSG00000174943.11:s:29923190-29923237	0.0911101437354198	0.436426945607667	5.11618649099045e-05	0.086	0.185	s|1e1.1o1|1e2.2o2|i	FALSE	FALSE	TRUE	3	3	1	chr16	-	ENSG00000174943.11:s:29923190-29923237_29921962-29923189	29923190	29923237	29921962	29923189			1227	chr16:29921962-29923189	chr16:29923190-29923237	47	2	source	none	FALSE
SMAD2	ENSG00000175387.16	ENSG00000175387.16:s:47930796-47931146	0.178827192057779	0.888511171524785	8.52752225822826e-07	0.312	0.509	s|1e1.3o4|1e2.2o2	FALSE	FALSE	TRUE	2	3	1	chr18	-	ENSG00000175387.16:s:47930796-47931146_47930446-47930800	47896521	47896811	47930446	47930800			354	chr18:47930446-47930800	chr18:47896521-47896811	290	2	source	annotated	FALSE
SMAD2	ENSG00000175387.16	ENSG00000175387.16:s:47930796-47931146	-0.178827218759824	0.888511273511678	8.52792855665641e-07	0.688	0.491	s|1e1.3o4|1e2.2o2	FALSE	FALSE	TRUE	2	3	1	chr18	-	ENSG00000175387.16:s:47930796-47931146_47896809-47930800	47930252	47930659	47896809	47930800			33991	chr18:47896809-47930800	chr18:47930252-47930659	407	2	source	annotated	FALSE
BAIAP2	ENSG00000175866.15	ENSG00000175866.15:s:81108475-81108827	-0.103684903770834	0.506275444566096	4.67476435161984e-06	0.537	0.402	s|1e1.1o1|1e2.1o1	FALSE	FALSE	TRUE	2	3	1	chr17	+	ENSG00000175866.15:s:81108475-81108827_81108509-81108968	81108475	81108827	81108509	81108968			459	chr17:81108509-81108968	chr17:81108475-81108827	352	1	source	annotated	FALSE
BAIAP2	ENSG00000175866.15	ENSG00000175866.15:s:81108475-81108827	0.103684874416995	0.506275121640299	4.67451285446232e-06	0.463	0.598	s|1e1.1o1|1e2.1o1	FALSE	FALSE	TRUE	2	3	1	chr17	+	ENSG00000175866.15:s:81108475-81108827_81108509-81115770	81108968	81109387	81108509	81115770			7261	chr17:81108509-81115770	chr17:81108968-81109387	419	2	source	annotated	FALSE
PUS1	ENSG00000177192.13	ENSG00000177192.13:t:131929907-131930135	-0.234973810345253	0.968370465776103	3.76195907869636e-07	0.301	0.045	t|1e1.1o3|1e1.2o3|1e2.1o1	TRUE	FALSE	TRUE	3	3	1	chr12	+	ENSG00000177192.13:t:131929907-131930135_131929380-131929907	131929304	131929512	131929380	131929907			527	chr12:131929380-131929907	chr12:131929304-131929512	208	1	target	annotated	FALSE
PUS1	ENSG00000177192.13	ENSG00000177192.13:t:131929907-131930135	0.0201450653746545	0.0402625499429989	4.54925902897835e-05	0.045	0.083	t|1e1.1o3|1e1.2o3|1e2.1o1	TRUE	FALSE	TRUE	3	3	1	chr12	+	ENSG00000177192.13:t:131929907-131930135_131929404-131929907	131929589	131929796	131929404	131929907			503	chr12:131929404-131929907	chr12:131929589-131929796	207	0	target	annotated	FALSE
PUS1	ENSG00000177192.13	ENSG00000177192.13:t:131929907-131930135	0.174782135173449	0.794074901831704	2.15918280000653e-06	0.653	0.872	t|1e1.1o3|1e1.2o3|1e2.1o1	TRUE	FALSE	TRUE	3	3	1	chr12	+	ENSG00000177192.13:t:131929907-131930135_131929796-131929907	131929907	131930135	131929796	131929907			111	chr12:131929796-131929907	chr12:131929907-131930135	228	0	target	annotated	FALSE
ZNF454	ENSG00000178187.7	ENSG00000178187.7:s:178946897-178946986	-0.101534331739079	0.486338163875718	5.23524233553285e-06	0.297	0.147	s|1e1.1o1|1e2.1o1	FALSE	FALSE	TRUE	2	3	0	chr5	+	ENSG00000178187.7:s:178946897-178946986_178946986-178956906	178946897	178946986	178946986	178956906			9920	chr5:178946986-178956906	chr5:178946897-178946986	89	2	source	novel_acceptor	FALSE
ZNF454	ENSG00000178187.7	ENSG00000178187.7:s:178946897-178946986	0.101534291210231	0.486337771234681	5.23497953449498e-06	0.703	0.853	s|1e1.1o1|1e2.1o1	FALSE	FALSE	TRUE	2	3	1	chr5	+	ENSG00000178187.7:s:178946897-178946986_178946986-178964655	178956906		178946986	178964655			17669	chr5:178946986-178964655	chr5:178956906-nan			source	annotated	FALSE
R3HDM2	ENSG00000179912.20	ENSG00000179912.20:s:57295399-57295594	0.0423895272731127	0.125746861498418	1.77819788643166e-05	0.405	0.468	s|1e1.1o2|1e1.2o2|1e2.1o1|1e3.1o1	FALSE	TRUE	TRUE	4	4	1	chr12	-	ENSG00000179912.20:s:57295399-57295594_57292667-57295399	57283824	57284056	57292667	57295399			2732	chr12:57292667-57295399	chr12:57283824-57284056	232	1	source	annotated	FALSE
R3HDM2	ENSG00000179912.20	ENSG00000179912.20:s:57295399-57295594	0.01842621004243	0.000403726490160377	0.00405249066337784	0.039	0.056	s|1e1.1o2|1e1.2o2|1e2.1o1|1e3.1o1	FALSE	TRUE	TRUE	4	4	1	chr12	-	ENSG00000179912.20:s:57295399-57295594_57292649-57295399	57289009	57289040	57292649	57295399			2750	chr12:57292649-57295399	chr12:57289009-57289040	31	1	source	annotated	FALSE
R3HDM2	ENSG00000179912.20	ENSG00000179912.20:s:57295399-57295594	-0.108580538615553	0.561083624152696	3.35038665055798e-06	0.431	0.305	s|1e1.1o2|1e1.2o2|1e2.1o1|1e3.1o1	FALSE	TRUE	TRUE	4	4	1	chr12	-	ENSG00000179912.20:s:57295399-57295594_57289040-57295399	57292572	57292667	57289040	57295399			6359	chr12:57289040-57295399	chr12:57292572-57292667	95	2	source	annotated	FALSE
R3HDM2	ENSG00000179912.20	ENSG00000179912.20:s:57295399-57295594	0.0303459562512724	0.0272257922450885	7.90496039481878e-05	0.128	0.172	s|1e1.1o2|1e1.2o2|1e2.1o1|1e3.1o1	FALSE	TRUE	TRUE	4	4	1	chr12	-	ENSG00000179912.20:s:57295399-57295594_57284056-57295399	57295399	57295594	57284056	57295399			11343	chr12:57284056-57295399	chr12:57295399-57295594	195	0	source	annotated	FALSE
R3HDM2	ENSG00000179912.20	ENSG00000179912.20:s:57430720-57431005	0.0511967377506521	0.155645081295874	1.60839885892658e-05	0.076	0.154	s|1e1.1o1|1e2.1o1|1e3.1o3	FALSE	FALSE	TRUE	3	4	0	chr12	-	ENSG00000179912.20:s:57430720-57431005_57422959-57430720		57422959	57422959	57430720			7761	chr12:57422959-57430720	chr12:nan-57422959			source	novel_acceptor	FALSE
R3HDM2	ENSG00000179912.20	ENSG00000179912.20:s:57430720-57431005	-0.166000205839623	0.812478842727658	1.63641478923005e-06	0.791	0.595	s|1e1.1o1|1e2.1o1|1e3.1o3	FALSE	FALSE	TRUE	3	4	1	chr12	-	ENSG00000179912.20:s:57430720-57431005_57395818-57430720	57310264	57310463	57395818	57430720			34902	chr12:57395818-57430720	chr12:57310264-57310463	199	1	source	annotated	FALSE
R3HDM2	ENSG00000179912.20	ENSG00000179912.20:s:57430720-57431005	0.0827772142644363	0.378865234464132	6.48699722850766e-06	0.134	0.25	s|1e1.1o1|1e2.1o1|1e3.1o3	FALSE	FALSE	TRUE	3	4	1	chr12	-	ENSG00000179912.20:s:57430720-57431005_57310463-57430720	57395749	57395818	57310463	57430720			120257	chr12:57310463-57430720	chr12:57395749-57395818	69	0	source	annotated	FALSE
NXPH4	ENSG00000182379.10	ENSG00000182379.10:t:57224878-57226449	-0.108843048078844	0.576919529581466	2.72479710885509e-05	0.672	0.554	t|1e1.1o1|1e2.1o1|i	FALSE	FALSE	TRUE	3	3	1	chr12	+	ENSG00000182379.10:t:57224878-57226449_57217026-57224878	57216794	57217026	57217026	57224878	57221545	57224877	7852	chr12:57217026-57224878	chr12:57216794-57217026	232	1	target	annotated	FALSE
NXPH4	ENSG00000182379.10	ENSG00000182379.10:t:57224878-57226449	0.104996187232318	0.545922111333432	3.67489730764368e-05	0.292	0.409	t|1e1.1o1|1e2.1o1|i	FALSE	FALSE	TRUE	3	3	1	chr12	+	ENSG00000182379.10:t:57224878-57226449_57219976-57224878	57219869	57219976	57219976	57224878			4902	chr12:57219976-57224878	chr12:57219869-57219976	107	2	target	annotated	FALSE
NXPH4	ENSG00000182379.10	ENSG00000182379.10:t:57224878-57226449	0.000641062330359846	7.58058887509292e-21	0.475000753152977	0.032	0.036	t|1e1.1o1|1e2.1o1|i	FALSE	FALSE	TRUE	3	3	0	chr12	+	ENSG00000182379.10:t:57224878-57226449_57221545-57224877	57224878	57226449	57221545	57224877			3332	chr12:57221545-57224877	chr12:57224878-57226449	1571	2	target	none	FALSE
ZNF320	ENSG00000182986.13	ENSG00000182986.13:s:52897510-52897635	-0.0188742848165434	0.0327253943378393	0.000622044051877935	0.085	0.049	s|1e1.1o2|1e1.2o2|1e2.2o2|i	FALSE	TRUE	TRUE	4	3	1	chr19	-	ENSG00000182986.13:s:52897510-52897635_52895782-52897520	52893779	52893927	52895782	52897520	52895783	52897509	1738	chr19:52895782-52897520	chr19:52893779-52893927	148	1	source	annotated	FALSE
ZNF320	ENSG00000182986.13	ENSG00000182986.13:s:52897510-52897635	-0.132049735377861	0.696276901240245	2.21815753167487e-05	0.209	0.049	s|1e1.1o2|1e1.2o2|1e2.2o2|i	FALSE	TRUE	TRUE	4	3	1	chr19	-	ENSG00000182986.13:s:52897510-52897635_52895435-52897520	52895339	52895782	52895435	52897520			2085	chr19:52895435-52897520	chr19:52895339-52895782	443	2	source	annotated	FALSE
ZNF320	ENSG00000182986.13	ENSG00000182986.13:s:52897510-52897635	-0.0275648237983826	0.1121459725795	0.000211277209230976	0.194	0.133	s|1e1.1o2|1e1.2o2|1e2.2o2|i	FALSE	TRUE	TRUE	4	3	1	chr19	-	ENSG00000182986.13:s:52897510-52897635_52893856-52897520	52897510	52897635	52893856	52897520			3664	chr19:52893856-52897520	chr19:52897510-52897635	125	2	source	annotated	FALSE
ZNF320	ENSG00000182986.13	ENSG00000182986.13:s:52897510-52897635	0.205699066908324	0.844841808285928	1.50961056747145e-05	0.514	0.771	s|1e1.1o2|1e1.2o2|1e2.2o2|i	FALSE	TRUE	TRUE	4	3	0	chr19	-	ENSG00000182986.13:s:52897510-52897635_52895783-52897509			52895783	52897509			1726	chr19:52895783-52897509	chr19:NA-NA			source	none	FALSE
WDR27	ENSG00000184465.16	ENSG00000184465.16:s:169659451-169659518	-0.209001361177342	0.973348635849972	1.3582713764837e-07	0.935	0.717	s|1e1.1o1|1e2.1o1	FALSE	FALSE	TRUE	2	3	1	chr6	-	ENSG00000184465.16:s:169659451-169659518_169659207-169659451	169658276	169658358	169659207	169659451			244	chr6:169659207-169659451	chr6:169658276-169658358	82	1	source	annotated	FALSE
WDR27	ENSG00000184465.16	ENSG00000184465.16:s:169659451-169659518	0.209001366074888	0.973348679371553	1.35820726800557e-07	0.065	0.283	s|1e1.1o1|1e2.1o1	FALSE	FALSE	TRUE	2	3	1	chr6	-	ENSG00000184465.16:s:169659451-169659518_169658358-169659451	169659086	169659207	169658358	169659451			1093	chr6:169658358-169659451	chr6:169659086-169659207	121	1	source	annotated	FALSE
WDR27	ENSG00000184465.16	ENSG00000184465.16:s:169664166-169664286	-0.0460258553992267	0.125952645666494	1.86863925287772e-05	0.196	0.125	s|1e1.1o5|1e1.2o5|1e1.4o5|1e1.5o5|1e2.1o1	FALSE	TRUE	TRUE	5	3	1	chr6	-	ENSG00000184465.16:s:169664166-169664286_169663878-169664166	169662304	169662424	169663878	169664166			288	chr6:169663878-169664166	chr6:169662304-169662424	120	0	source	annotated	FALSE
WDR27	ENSG00000184465.16	ENSG00000184465.16:s:169664166-169664286	-0.0373027874928069	0.0585794562297274	3.99594425926075e-05	0.136	0.08	s|1e1.1o5|1e1.2o5|1e1.4o5|1e1.5o5|1e2.1o1	FALSE	TRUE	TRUE	5	3	0	chr6	-	ENSG00000184465.16:s:169664166-169664286_169663801-169664166	169663563	169663878	169663801	169664166			365	chr6:169663801-169664166	chr6:169663563-169663878	315	0	source	novel_acceptor	FALSE
WDR27	ENSG00000184465.16	ENSG00000184465.16:s:169664166-169664286	-0.0744374226939163	0.294535470205689	6.2952669084293e-06	0.121	0.034	s|1e1.1o5|1e1.2o5|1e1.4o5|1e1.5o5|1e2.1o1	FALSE	TRUE	TRUE	5	3	1	chr6	-	ENSG00000184465.16:s:169664166-169664286_169663706-169664166	169664166	169664286	169663706	169664166			460	chr6:169663706-169664166	chr6:169664166-169664286	120	0	source	annotated	FALSE
WDR27	ENSG00000184465.16	ENSG00000184465.16:s:169664166-169664286	-0.0146492856205154	0.0258180118310737	5.65361550353138e-05	0.196	0.167	s|1e1.1o5|1e1.2o5|1e1.4o5|1e1.5o5|1e2.1o1	FALSE	TRUE	TRUE	5	3	1	chr6	-	ENSG00000184465.16:s:169664166-169664286_169663649-169664166			169663649	169664166			517	chr6:169663649-169664166	chr6:NA-NA			source	annotated	FALSE
WDR27	ENSG00000184465.16	ENSG00000184465.16:s:169664166-169664286	0.225273783574831	0.975937419986725	1.99349595240069e-07	0.351	0.595	s|1e1.1o5|1e1.2o5|1e1.4o5|1e1.5o5|1e2.1o1	FALSE	TRUE	TRUE	5	3	1	chr6	-	ENSG00000184465.16:s:169664166-169664286_169662424-169664166			169662424	169664166			1742	chr6:169662424-169664166	chr6:NA-NA			source	annotated	FALSE
ZNF197	ENSG00000186448.15	ENSG00000186448.15:t:44628988-44629544	0.033035408334647	0.00428806994653008	0.000588594519737728	0.04	0.071	t|1e1.1o1|1e2.1o1|2e3.1o1|2e4.1o1	FALSE	TRUE	TRUE	4	5	0	chr3	+	ENSG00000186448.15:t:44628988-44629544_44586213-44629065	44586105	44586213	44586213	44629065			42852	chr3:44586213-44629065	chr3:44586105-44586213	108	0	target	ambig_gene	FALSE
ZNF197	ENSG00000186448.15	ENSG00000186448.15:t:44628988-44629544	0.047396845857637	0.130058588461427	1.63565967675854e-05	0.193	0.26	t|1e1.1o1|1e2.1o1|2e3.1o1|2e4.1o1	FALSE	TRUE	TRUE	4	5	1	chr3	+	ENSG00000186448.15:t:44628988-44629544_44625143-44629065	44625019	44625143	44625143	44629065			3922	chr3:44625143-44629065	chr3:44625019-44625143	124	1	target	annotated	FALSE
ZNF197	ENSG00000186448.15	ENSG00000186448.15:t:44628988-44629544	-0.113823179951088	0.609563485298562	2.61817696967093e-06	0.319	0.192	t|1e1.1o1|1e2.1o1|2e3.1o1|2e4.1o1	FALSE	TRUE	TRUE	4	5	1	chr3	+	ENSG00000186448.15:t:44628988-44629544_44586213-44629074	44628988	44629544	44586213	44629074			42861	chr3:44586213-44629074	chr3:44628988-44629544	556	1	target	annotated	FALSE
ZNF197	ENSG00000186448.15	ENSG00000186448.15:t:44628988-44629544	0.015841574223684	0.0305296572659893	5.3265089617574e-05	0.445	0.475	t|1e1.1o1|1e2.1o1|2e3.1o1|2e4.1o1	FALSE	TRUE	TRUE	4	5	1	chr3	+	ENSG00000186448.15:t:44628988-44629544_44625143-44629074			44625143	44629074			3931	chr3:44625143-44629074	chr3:NA-NA			target	annotated	FALSE
NTNG2	ENSG00000196358.11	ENSG00000196358.11:t:132166349-132167044	-0.105203826793562	0.525019194904444	4.18414401248679e-06	0.822	0.684	t|1e1.1o1|1e2.2o2	FALSE	FALSE	TRUE	2	3	1	chr9	+	ENSG00000196358.11:t:132166349-132167044_132162239-132166349	132162058	132162239	132162239	132166349			4110	chr9:132162239-132166349	chr9:132162058-132162239	181	1	target	annotated	FALSE
NTNG2	ENSG00000196358.11	ENSG00000196358.11:t:132166349-132167044	0.105203811484509	0.525018908812413	4.18391291985635e-06	0.178	0.316	t|1e1.1o1|1e2.2o2	FALSE	FALSE	TRUE	2	3	0	chr9	+	ENSG00000196358.11:t:132166349-132167044_132166113-132166349	132166029	132166113	132166113	132166349			236	chr9:132166113-132166349	chr9:132166029-132166113	84	0	target	novel_donor	FALSE
ANAPC7	ENSG00000196510.12	ENSG00000196510.12:s:110403527-110403730	0.00161562667022312	1.9508608695152e-07	0.451456746725679	0.025	0.036	s|1e1.2o2|2e2.1o1|2e3.2o2|i	TRUE	FALSE	TRUE	4	4	0	chr12	-	ENSG00000196510.12:s:110403527-110403730_110396452-110403574	110396266	110396510	110396452	110403574	110401505	110403526	7122	chr12:110396452-110403574	chr12:110396266-110396510	244	1	source	ambig_gene	FALSE
ANAPC7	ENSG00000196510.12	ENSG00000196510.12:s:110403527-110403730	0.023633912895803	0.00392412219251759	0.00607126488703277	0.044	0.072	s|1e1.2o2|2e2.1o1|2e3.2o2|i	TRUE	FALSE	TRUE	4	4	0	chr12	-	ENSG00000196510.12:s:110403527-110403730_110401504-110403527	110401353	110401504	110401504	110403527			2023	chr12:110401504-110403527	chr12:110401353-110401504	151	1	source	novel_acceptor	FALSE
ANAPC7	ENSG00000196510.12	ENSG00000196510.12:s:110403527-110403730	-0.110826274132277	0.605931915683008	1.49985986940271e-05	0.931	0.813	s|1e1.2o2|2e2.1o1|2e3.2o2|i	TRUE	FALSE	TRUE	4	4	1	chr12	-	ENSG00000196510.12:s:110403527-110403730_110396452-110403527	110403527	110403730	110396452	110403527			7075	chr12:110396452-110403527	chr12:110403527-110403730	203	2	source	annotated	FALSE
ANAPC7	ENSG00000196510.12	ENSG00000196510.12:s:110403527-110403730	0.0522878200933745	0.0355022566287995	0.0013059782560736	0.001	0.08	s|1e1.2o2|2e2.1o1|2e3.2o2|i	TRUE	FALSE	TRUE	4	4	0	chr12	-	ENSG00000196510.12:s:110403527-110403730_110401505-110403526			110401505	110403526			2021	chr12:110401505-110403526	chr12:NA-NA			source	none	FALSE
PCNX3	ENSG00000197136.4	ENSG00000197136.4:s:65619537-65619660	-0.12228860304435	0.596170624871835	3.80994974402693e-06	0.834	0.672	s|1e1.1o3|1e1.2o3	FALSE	TRUE	FALSE	2	2	1	chr11	+	ENSG00000197136.4:s:65619537-65619660_65619660-65619754	65619537	65619660	65619660	65619754			94	chr11:65619660-65619754	chr11:65619537-65619660	123	0	source	annotated	FALSE
PCNX3	ENSG00000197136.4	ENSG00000197136.4:s:65619537-65619660	0.122288591239576	0.596170431406123	3.80974966865221e-06	0.166	0.328	s|1e1.1o3|1e1.2o3	FALSE	TRUE	FALSE	2	2	0	chr11	+	ENSG00000197136.4:s:65619537-65619660_65619660-65619757	65619754	65619932	65619660	65619757			97	chr11:65619660-65619757	chr11:65619754-65619932	178	1	source	novel_acceptor	FALSE
PCNX3	ENSG00000197136.4	ENSG00000197136.4:s:65620831-65620966	-0.0168581371130853	0.0629474379557578	3.04364329025697e-05	0.376	0.342	s|1e1.1o3|1e1.2o3|1e1.3o3	FALSE	TRUE	FALSE	3	2	0	chr11	+	ENSG00000197136.4:s:65620831-65620966_65620966-65622206	65620831	65620966	65620966	65622206			1240	chr11:65620966-65622206	chr11:65620831-65620966	135	0	source	novel_acceptor	FALSE
PCNX3	ENSG00000197136.4	ENSG00000197136.4:s:65620831-65620966	0.101481175973729	0.518233796429893	2.69858164578066e-06	0.028	0.143	s|1e1.1o3|1e1.2o3|1e1.3o3	FALSE	TRUE	FALSE	3	2	0	chr11	+	ENSG00000197136.4:s:65620831-65620966_65620966-65622224	65622206	65622366	65620966	65622224			1258	chr11:65620966-65622224	chr11:65622206-65622366	160	1	source	novel_acceptor	TRUE
PCNX3	ENSG00000197136.4	ENSG00000197136.4:s:65620831-65620966	-0.0446665212186089	0.176226510600027	1.38437806904701e-05	0.596	0.515	s|1e1.1o3|1e1.2o3|1e1.3o3	FALSE	TRUE	FALSE	3	2	1	chr11	+	ENSG00000197136.4:s:65620831-65620966_65620966-65622245			65620966	65622245			1279	chr11:65620966-65622245	chr11:NA-NA			source	annotated	FALSE
AC092143.1	ENSG00000198211.8	ENSG00000198211.8:t:89932571-89932679	0.327287734659863	0.982826165634239	6.08365976763548e-07	0.103	0.457	t|1e1.1o1|1e2.1o1	FALSE	FALSE	TRUE	2	3	1	chr16	+	ENSG00000198211.8:t:89932571-89932679_89920737-89932571		89921902	89920737	89932571			11834	chr16:89920737-89932571	chr16:nan-89921902			target	annotated	FALSE
AC092143.1	ENSG00000198211.8	ENSG00000198211.8:t:89932571-89932679	-0.327287734952529	0.982826159166276	6.0839238680277e-07	0.897	0.543	t|1e1.1o1|1e2.1o1	FALSE	FALSE	TRUE	2	3	0	chr16	+	ENSG00000198211.8:t:89932571-89932679_89921902-89932571	89920590	89920737	89921902	89932571			10669	chr16:89921902-89932571	chr16:89920590-89920737	147	0	target	ambig_gene	FALSE
UNC13B	ENSG00000198722.14	ENSG00000198722.14:s:35313899-35313989	0.305352132579162	0.999999999593544	2.77137964898811e-20	0.011	0.329	s|1e1.1o1|1e2.1o1	FALSE	FALSE	TRUE	2	3	1	chr9	+	ENSG00000198722.14:s:35313899-35313989_35313989-35364545	35313899	35313989	35313989	35364545			50556	chr9:35313989-35364545	chr9:35313899-35313989	90	0	source	annotated	FALSE
UNC13B	ENSG00000198722.14	ENSG00000198722.14:s:35313899-35313989	-0.305352151490443	0.999999999997482	0	0.989	0.671	s|1e1.1o1|1e2.1o1	FALSE	FALSE	TRUE	2	3	1	chr9	+	ENSG00000198722.14:s:35313899-35313989_35313989-35366947	35364545	35364567	35313989	35366947			52958	chr9:35313989-35366947	chr9:35364545-35364567	22	1	source	annotated	FALSE
UNC13B	ENSG00000198722.14	ENSG00000198722.14:s:35384246-35384314	-0.163692538894185	0.868168590094313	7.32894142363438e-06	0.798	0.615	s|1e1.1o1|i	FALSE	FALSE	FALSE	2	2	1	chr9	+	ENSG00000198722.14:s:35384246-35384314_35384314-35385724	35384246	35384314	35384314	35385724	35384315	35385723	1410	chr9:35384314-35385724	chr9:35384246-35384314	68	2	source	annotated	FALSE
UNC13B	ENSG00000198722.14	ENSG00000198722.14:s:35384246-35384314	0.163692515423695	0.868168431004915	7.32835227689816e-06	0.202	0.385	s|1e1.1o1|i	FALSE	FALSE	FALSE	2	2	0	chr9	+	ENSG00000198722.14:s:35384246-35384314_35384315-35385723	35385724	35385813	35384315	35385723			1408	chr9:35384315-35385723	chr9:35385724-35385813	89	2	source	none	FALSE
PHACTR4	ENSG00000204138.13	ENSG00000204138.13:s:28407410-28407463	0.0120842530882271	0.00170265807144475	0.000641614591403713	0.031	0.05	s|1e1.1o1|1e2.1o1|1e3.1o1	FALSE	FALSE	TRUE	3	4	1	chr1	+	ENSG00000204138.13:s:28407410-28407463_28407463-28432931	28407410	28407463	28407463	28432931			25468	chr1:28407463-28432931	chr1:28407410-28407463	53	2	source	annotated	FALSE
PHACTR4	ENSG00000204138.13	ENSG00000204138.13:s:28407410-28407463	0.127247658070769	0.669637469427634	2.47303195341117e-06	0.675	0.824	s|1e1.1o1|1e2.1o1|1e3.1o1	FALSE	FALSE	TRUE	3	4	1	chr1	+	ENSG00000204138.13:s:28407410-28407463_28407463-28457832	28432931	28433046	28407463	28457832			50369	chr1:28407463-28457832	chr1:28432931-28433046	115	1	source	annotated	FALSE
PHACTR4	ENSG00000204138.13	ENSG00000204138.13:s:28407410-28407463	-0.154247090297695	0.830062133373637	1.04486978869112e-06	0.294	0.126	s|1e1.1o1|1e2.1o1|1e3.1o1	FALSE	FALSE	TRUE	3	4	1	chr1	+	ENSG00000204138.13:s:28407410-28407463_28407463-28459085	28457832	28457859	28407463	28459085			51622	chr1:28407463-28459085	chr1:28457832-28457859	27	0	source	annotated	FALSE
PHACTR4	ENSG00000204138.13	ENSG00000204138.13:t:28459085-28459258	-0.239843509178805	0.973683647236065	3.14215080954305e-07	0.451	0.188	t|1e1.1o1|1e2.1o2|1e2.2o2	TRUE	FALSE	TRUE	3	3	1	chr1	+	ENSG00000204138.13:t:28459085-28459258_28407463-28459085	28407410	28407463	28407463	28459085			51622	chr1:28407463-28459085	chr1:28407410-28407463	53	2	target	annotated	FALSE
PHACTR4	ENSG00000204138.13	ENSG00000204138.13:t:28459085-28459258	0.0175647010030416	0.0650516003836412	2.98289560314996e-05	0.245	0.284	t|1e1.1o1|1e2.1o2|1e2.2o2	TRUE	FALSE	TRUE	3	3	1	chr1	+	ENSG00000204138.13:t:28459085-28459258_28457855-28459085	28457832	28457859	28457855	28459085			1230	chr1:28457855-28459085	chr1:28457832-28457859	27	0	target	annotated	FALSE
PHACTR4	ENSG00000204138.13	ENSG00000204138.13:t:28459085-28459258	0.190898707272223	0.873136478477721	1.27365414989429e-06	0.305	0.528	t|1e1.1o1|1e2.1o2|1e2.2o2	TRUE	FALSE	TRUE	3	3	1	chr1	+	ENSG00000204138.13:t:28459085-28459258_28457859-28459085	28459085	28459258	28457859	28459085			1226	chr1:28457859-28459085	chr1:28459085-28459258	173	2	target	annotated	FALSE
FBXO48	ENSG00000204923.4	ENSG00000204923.4:s:68467211-68467294	0.223682504889895	0.859398072931472	2.06759972558443e-06	0.518	0.799	s|1e1.1o2|1e1.2o2	FALSE	TRUE	FALSE	2	2	0	chr2	-	ENSG00000204923.4:s:68467211-68467294_68466473-68467211	68466144	68466473	68466473	68467211			738	chr2:68466473-68467211	chr2:68466144-68466473	329	2	source	novel_acceptor	FALSE
FBXO48	ENSG00000204923.4	ENSG00000204923.4:s:68467211-68467294	-0.223682502676241	0.859398121942244	2.06769297683707e-06	0.482	0.201	s|1e1.1o2|1e1.2o2	FALSE	TRUE	FALSE	2	2	1	chr2	-	ENSG00000204923.4:s:68467211-68467294_68466470-68467211	68467211	68467294	68466470	68467211			741	chr2:68466470-68467211	chr2:68467211-68467294	83	2	source	annotated	FALSE
RNPS1	ENSG00000205937.12	ENSG00000205937.12:s:2267575-2267603	-0.10632718136783	0.5402667227936	4.06928881351298e-05	0.339	0.204	s|1e1.3o3|i	FALSE	FALSE	FALSE	2	2	1	chr16	-	ENSG00000205937.12:s:2267575-2267603_2264760-2267575	2264573	2265250	2264760	2267575	2267338	2267574	2815	chr16:2264760-2267575	chr16:2264573-2265250	677	2	source	annotated	FALSE
RNPS1	ENSG00000205937.12	ENSG00000205937.12:s:2267575-2267603	0.10632713355026	0.54026627614135	4.06897147382457e-05	0.661	0.796	s|1e1.3o3|i	FALSE	FALSE	FALSE	2	2	1	chr16	-	ENSG00000205937.12:s:2267575-2267603_2267338-2267574	2267575	2267603	2267338	2267574			236	chr16:2267338-2267574	chr16:2267575-2267603	28	1	source	none	FALSE
DNASE1	ENSG00000213918.10	ENSG00000213918.10:s:3656638-3656753	-0.0285260258133062	0.0693483900555258	2.88418048335348e-05	0.185	0.135	s|1e1.1o2|1e1.2o2|1e2.1o5|1e2.2o5	FALSE	TRUE	TRUE	4	3	1	chr16	+	ENSG00000213918.10:s:3656638-3656753_3656753-3656964	3656638	3656753	3656753	3656964			211	chr16:3656753-3656964	chr16:3656638-3656753	115	1	source	annotated	FALSE
DNASE1	ENSG00000213918.10	ENSG00000213918.10:s:3656638-3656753	-0.079997661307403	0.355471109120428	6.85223257490542e-06	0.206	0.099	s|1e1.1o2|1e1.2o2|1e2.1o5|1e2.2o5	FALSE	TRUE	TRUE	4	3	1	chr16	+	ENSG00000213918.10:s:3656638-3656753_3656753-3656999	3656964	3657111	3656753	3656999			246	chr16:3656753-3656999	chr16:3656964-3657111	147	0	source	annotated	FALSE
DNASE1	ENSG00000213918.10	ENSG00000213918.10:s:3656638-3656753	0.150307686438384	0.760436522720853	1.96482503637642e-06	0.193	0.37	s|1e1.1o2|1e1.2o2|1e2.1o5|1e2.2o5	FALSE	TRUE	TRUE	4	3	0	chr16	+	ENSG00000213918.10:s:3656638-3656753_3656753-3657162	3657162	3657341	3656753	3657162			409	chr16:3656753-3657162	chr16:3657162-3657341	179	2	source	novel_acceptor	FALSE
DNASE1	ENSG00000213918.10	ENSG00000213918.10:s:3656638-3656753	-0.00865237436756788	0.055672934480748	3.34793554878088e-05	0.414	0.395	s|1e1.1o2|1e1.2o2|1e2.1o5|1e2.2o5	FALSE	TRUE	TRUE	4	3	1	chr16	+	ENSG00000213918.10:s:3656638-3656753_3656753-3657187			3656753	3657187			434	chr16:3656753-3657187	chr16:NA-NA			source	annotated	FALSE
DNASE1	ENSG00000213918.10	ENSG00000213918.10:t:3657162-3657341	0.17877187017911	0.828842933277729	1.69581540116444e-06	0.248	0.461	t|1e1.1o1|2e1.1o1|2e2.2o2	FALSE	TRUE	TRUE	3	3	0	chr16	+	ENSG00000213918.10:t:3657162-3657341_3656753-3657162	3656638	3656753	3656753	3657162			409	chr16:3656753-3657162	chr16:3656638-3656753	115	1	target	novel_acceptor	FALSE
DNASE1	ENSG00000213918.10	ENSG00000213918.10:t:3657162-3657341	-0.0174806231884283	0.0893550839989272	2.39404036893598e-05	0.532	0.491	t|1e1.1o1|2e1.1o1|2e2.2o2	FALSE	TRUE	TRUE	3	3	1	chr16	+	ENSG00000213918.10:t:3657162-3657341_3656753-3657187	3656964	3657111	3656753	3657187			434	chr16:3656753-3657187	chr16:3656964-3657111	147	0	target	annotated	FALSE
DNASE1	ENSG00000213918.10	ENSG00000213918.10:t:3657162-3657341	-0.160367026143394	0.850397027520218	8.93242754540502e-07	0.221	0.047	t|1e1.1o1|2e1.1o1|2e2.2o2	FALSE	TRUE	TRUE	3	3	1	chr16	+	ENSG00000213918.10:t:3657162-3657341_3657111-3657187	3657162	3657341	3657111	3657187			76	chr16:3657111-3657187	chr16:3657162-3657341	179	2	target	annotated	FALSE
AL139158.2	ENSG00000224592.5	ENSG00000224592.5:s:38047314-38047614	0.127142800556888	0.59833635091981	4.09286831074083e-06	0.255	0.44	s|1e1.1o1|1e2.1o1|1e3.1o2|1e3.2o2	FALSE	TRUE	TRUE	4	4	0	chr1	+	ENSG00000224592.5:s:38047314-38047614_38047614-38055509	38047314	38047614	38047614	38055509			7895	chr1:38047614-38055509	chr1:38047314-38047614	300	0	source	novel_acceptor	FALSE
AL139158.2	ENSG00000224592.5	ENSG00000224592.5:s:38047314-38047614	0.295496458336035	0.995584643217092	7.21687557647152e-08	0.072	0.384	s|1e1.1o1|1e2.1o1|1e3.1o2|1e3.2o2	FALSE	TRUE	TRUE	4	4	0	chr1	+	ENSG00000224592.5:s:38047314-38047614_38047614-38089429	38055509		38047614	38089429			41815	chr1:38047614-38089429	chr1:38055509-nan			source	novel_acceptor	FALSE
AL139158.2	ENSG00000224592.5	ENSG00000224592.5:s:38047314-38047614	-0.524074626575553	0.999999952734917	5.11954589832442e-10	0.584	0.071	s|1e1.1o1|1e2.1o1|1e3.1o2|1e3.2o2	FALSE	TRUE	TRUE	4	4	1	chr1	+	ENSG00000224592.5:s:38047314-38047614_38047614-38102417	38089429		38047614	38102417			54803	chr1:38047614-38102417	chr1:38089429-nan			source	annotated	FALSE
AL139158.2	ENSG00000224592.5	ENSG00000224592.5:s:38047314-38047614	0.00663882659881482	0.0228764126141132	6.4469827404906e-05	0.089	0.104	s|1e1.1o1|1e2.1o1|1e3.1o2|1e3.2o2	FALSE	TRUE	TRUE	4	4	1	chr1	+	ENSG00000224592.5:s:38047314-38047614_38047614-38102424	38102417	38102496	38047614	38102424			54810	chr1:38047614-38102424	chr1:38102417-38102496	79	1	source	annotated	FALSE
AC092614.1	ENSG00000227542.1	ENSG00000227542.1:t:191243620-191244073	0.130066265763834	0.585725852244486	4.62965053805997e-06	0.296	0.499	t|1e1.1o1|1e2.1o1	FALSE	FALSE	TRUE	2	3	1	chr2	-	ENSG00000227542.1:t:191243620-191244073_191244073-191245919	191243620	191244073	191244073	191245919			1846	chr2:191244073-191245919	chr2:191243620-191244073	453	0	target	annotated	FALSE
AC092614.1	ENSG00000227542.1	ENSG00000227542.1:t:191243620-191244073	-0.13006630935963	0.585726135312539	4.62986130622678e-06	0.704	0.501	t|1e1.1o1|1e2.1o1	FALSE	FALSE	TRUE	2	3	0	chr2	-	ENSG00000227542.1:t:191243620-191244073_191244073-191244992	191244992	191245070	191244073	191244992			919	chr2:191244073-191244992	chr2:191244992-191245070	78	0	target	novel_donor	FALSE
PSMG3-AS1	ENSG00000230487.8	ENSG00000230487.8:s:1570073-1570533	0.245228907388674	0.994936114245901	2.96198858163446e-08	0.712	0.972	s|1e1.1o1|2e1.1o1	TRUE	FALSE	FALSE	2	2	1	chr7	+	ENSG00000230487.8:s:1570073-1570533_1570279-1574715	1570073	1570533	1570279	1574715			4436	chr7:1570279-1574715	chr7:1570073-1570533	460	1	source	annotated	FALSE
PSMG3-AS1	ENSG00000230487.8	ENSG00000230487.8:s:1570073-1570533	-0.245228923782253	0.994936115212551	2.96211618566744e-08	0.288	0.028	s|1e1.1o1|2e1.1o1	TRUE	FALSE	FALSE	2	2	1	chr7	+	ENSG00000230487.8:s:1570073-1570533_1570533-1574715	1574715	1574863	1570533	1574715			4182	chr7:1570533-1574715	chr7:1574715-1574863	148	1	source	annotated	FALSE
PSMG3-AS1	ENSG00000230487.8	ENSG00000230487.8:s:1575787-1576062	0.175723137983908	0.840505966924301	1.45118679583782e-06	0.172	0.377	s|1e1.1o1|1e2.1o1|1e3.1o1	FALSE	FALSE	TRUE	3	4	1	chr7	+	ENSG00000230487.8:s:1575787-1576062_1575888-1579287	1575787	1576062	1575888	1579287			3399	chr7:1575888-1579287	chr7:1575787-1576062	275	2	source	annotated	FALSE
PSMG3-AS1	ENSG00000230487.8	ENSG00000230487.8:s:1575787-1576062	-0.0110503622168522	0.0715089388785978	2.79916406245029e-05	0.448	0.421	s|1e1.1o1|1e2.1o1|1e3.1o1	FALSE	FALSE	TRUE	3	4	1	chr7	+	ENSG00000230487.8:s:1575787-1576062_1575888-1583162	1579287	1579485	1575888	1583162			7274	chr7:1575888-1583162	chr7:1579287-1579485	198	0	source	annotated	FALSE
PSMG3-AS1	ENSG00000230487.8	ENSG00000230487.8:s:1575787-1576062	-0.144355044113753	0.713990353076993	2.54182967684979e-06	0.377	0.199	s|1e1.1o1|1e2.1o1|1e3.1o1	FALSE	FALSE	TRUE	3	4	1	chr7	+	ENSG00000230487.8:s:1575787-1576062_1575888-1584384	1583162	1583269	1575888	1584384			8496	chr7:1575888-1584384	chr7:1583162-1583269	107	2	source	annotated	FALSE
VLDLR-AS1	ENSG00000236404.10	ENSG00000236404.10:t:2539399-2539552	-0.153245798576419	0.720635732486315	2.81977065730299e-06	0.262	0.06	t|1e1.1o1|1e2.1o1	FALSE	FALSE	TRUE	2	3	1	chr9	-	ENSG00000236404.10:t:2539399-2539552_2539552-2622100	2539399	2539552	2539552	2622100			82548	chr9:2539552-2622100	chr9:2539399-2539552	153	0	target	annotated	FALSE
VLDLR-AS1	ENSG00000236404.10	ENSG00000236404.10:t:2539399-2539552	0.153245774153718	0.72063556480542	2.81964788738853e-06	0.738	0.94	t|1e1.1o1|1e2.1o1	FALSE	FALSE	TRUE	2	3	1	chr9	-	ENSG00000236404.10:t:2539399-2539552_2539552-2621229	2621229	2621415	2539552	2621229			81677	chr9:2539552-2621229	chr9:2621229-2621415	186	0	target	annotated	FALSE
ERICH6-AS1	ENSG00000240137.6	ENSG00000240137.6:t:150707932-150708009	-0.157718099036129	0.739424302948432	2.58528792584922e-06	0.316	0.113	t|1e1.1o1|1e2.1o1	FALSE	FALSE	TRUE	2	3	1	chr3	+	ENSG00000240137.6:t:150707932-150708009_150703667-150707932	150703564	150703667	150703667	150707932			4265	chr3:150703667-150707932	chr3:150703564-150703667	103	1	target	annotated	FALSE
ERICH6-AS1	ENSG00000240137.6	ENSG00000240137.6:t:150707932-150708009	0.157718054865212	0.739424060942559	2.58516475155706e-06	0.684	0.887	t|1e1.1o1|1e2.1o1	FALSE	FALSE	TRUE	2	3	1	chr3	+	ENSG00000240137.6:t:150707932-150708009_150707171-150707932	150704962	150707171	150707171	150707932			761	chr3:150707171-150707932	chr3:150704962-150707171	2209	1	target	annotated	FALSE
AC022400.3	ENSG00000242288.9	ENSG00000242288.9:s:73697095-73697163	0.149277013608512	0.803395859194605	9.96800002308947e-07	0.006	0.191	s|1e1.1o1|1e2.1o1	FALSE	FALSE	TRUE	2	3	0	chr10	-	ENSG00000242288.9:s:73697095-73697163_73696948-73697095	73694736	73694804	73696948	73697095			147	chr10:73696948-73697095	chr10:73694736-73694804	68	2	source	ambig_gene	TRUE
AC022400.3	ENSG00000242288.9	ENSG00000242288.9:s:73697095-73697163	-0.149277012385221	0.803396111285531	9.96851130863341e-07	0.994	0.809	s|1e1.1o1|1e2.1o1	FALSE	FALSE	TRUE	2	3	1	chr10	-	ENSG00000242288.9:s:73697095-73697163_73694804-73697095	73696925	73696948	73694804	73697095			2291	chr10:73694804-73697095	chr10:73696925-73696948	23	2	source	annotated	FALSE
LINC02223	ENSG00000249937.8	ENSG00000249937.8:t:17920227-17920309	0.0664184524849878	0.293576459002544	9.11920945961472e-06	0.195	0.313	t|1e1.1o1|1e2.1o1|1e3.1o1|1e4.1o1	FALSE	FALSE	TRUE	4	5	0	chr5	+	ENSG00000249937.8:t:17920227-17920309_17802574-17920227	17802383	17802574	17802574	17920227			117653	chr5:17802574-17920227	chr5:17802383-17802574	191	2	target	novel_exon_skip	FALSE
LINC02223	ENSG00000249937.8	ENSG00000249937.8:t:17920227-17920309	-0.00288331804523887	0.0272394551209957	5.72130303987395e-05	0.126	0.122	t|1e1.1o1|1e2.1o1|1e3.1o1|1e4.1o1	FALSE	FALSE	TRUE	4	5	1	chr5	+	ENSG00000249937.8:t:17920227-17920309_17852706-17920227	17852566	17852706	17852706	17920227			67521	chr5:17852706-17920227	chr5:17852566-17852706	140	2	target	annotated	FALSE
LINC02223	ENSG00000249937.8	ENSG00000249937.8:t:17920227-17920309	-0.10790848777622	0.50587568134017	5.28314821268694e-06	0.657	0.487	t|1e1.1o1|1e2.1o1|1e3.1o1|1e4.1o1	FALSE	FALSE	TRUE	4	5	1	chr5	+	ENSG00000249937.8:t:17920227-17920309_17873086-17920227	17873020	17873086	17873086	17920227			47141	chr5:17873086-17920227	chr5:17873020-17873086	66	0	target	annotated	FALSE
LINC02223	ENSG00000249937.8	ENSG00000249937.8:t:17920227-17920309	0.0317325012179484	0.0425465322509597	5.06769241767404e-05	0.022	0.077	t|1e1.1o1|1e2.1o1|1e3.1o1|1e4.1o1	FALSE	FALSE	TRUE	4	5	1	chr5	+	ENSG00000249937.8:t:17920227-17920309_17919323-17920227	17919158	17919323	17919323	17920227			904	chr5:17919323-17920227	chr5:17919158-17919323	165	0	target	annotated	FALSE
FAM66D	ENSG00000255052.5	ENSG00000255052.5:s:12145639-12145700	0.0163732853755064	0.063252615555172	3.06665980047416e-05	0.113	0.147	s|1e1.1o2|1e1.2o2|1e2.1o1|1e3.1o1	FALSE	TRUE	TRUE	4	4	1	chr8	+	ENSG00000255052.5:s:12145639-12145700_12145700-12145932	12145639	12145700	12145700	12145932			232	chr8:12145700-12145932	chr8:12145639-12145700	61	1	source	annotated	FALSE
FAM66D	ENSG00000255052.5	ENSG00000255052.5:s:12145639-12145700	0.177296691641209	0.894306307937357	6.67830560774073e-07	0.023	0.226	s|1e1.1o2|1e1.2o2|1e2.1o1|1e3.1o1	FALSE	TRUE	TRUE	4	4	1	chr8	+	ENSG00000255052.5:s:12145639-12145700_12145700-12145948	12145932	12148167	12145700	12145948			248	chr8:12145700-12145948	chr8:12145932-12148167	2235	0	source	annotated	FALSE
FAM66D	ENSG00000255052.5	ENSG00000255052.5:s:12145639-12145700	0.00273092083327256	0.031297601263031	5.08014116512578e-05	0.095	0.1	s|1e1.1o2|1e1.2o2|1e2.1o1|1e3.1o1	FALSE	TRUE	TRUE	4	4	1	chr8	+	ENSG00000255052.5:s:12145639-12145700_12145700-12168646	12168646	12172042	12145700	12168646			22946	chr8:12145700-12168646	chr8:12168646-12172042	3396	0	source	annotated	FALSE
FAM66D	ENSG00000255052.5	ENSG00000255052.5:s:12145639-12145700	-0.188503238932821	0.792399131700028	2.52403976319648e-06	0.77	0.527	s|1e1.1o2|1e1.2o2|1e2.1o1|1e3.1o1	FALSE	TRUE	TRUE	4	4	1	chr8	+	ENSG00000255052.5:s:12145639-12145700_12145700-12176823	12176823	12176965	12145700	12176823			31123	chr8:12145700-12176823	chr8:12176823-12176965	142	1	source	annotated	FALSE
CEP95	ENSG00000258890.7	ENSG00000258890.7:s:64514229-64514807	-0.102120073596489	0.507832429306135	4.60972480725852e-05	0.431	0.291	s|1e1.1o1|1e2.1o2|i	FALSE	FALSE	TRUE	3	3	1	chr17	+	ENSG00000258890.7:s:64514229-64514807_64514358-64516723	64514229	64514807	64514358	64516723	64514808	64515722	2365	chr17:64514358-64516723	chr17:64514229-64514807	578	2	source	annotated	FALSE
CEP95	ENSG00000258890.7	ENSG00000258890.7:s:64514229-64514807	0.0949949862190169	0.464702334866678	5.30015304595101e-05	0.475	0.611	s|1e1.1o1|1e2.1o2|i	FALSE	FALSE	TRUE	3	3	1	chr17	+	ENSG00000258890.7:s:64514229-64514807_64514358-64519321	64516723	64516828	64514358	64519321			4963	chr17:64514358-64519321	chr17:64516723-64516828	105	0	source	annotated	FALSE
CEP95	ENSG00000258890.7	ENSG00000258890.7:s:64514229-64514807	0.00173688456438708	0.00575935273876695	0.0022195665389646	0.094	0.098	s|1e1.1o1|1e2.1o2|i	FALSE	FALSE	TRUE	3	3	0	chr17	+	ENSG00000258890.7:s:64514229-64514807_64514808-64515722	64519321	64519436	64514808	64515722			914	chr17:64514808-64515722	chr17:64519321-64519436	115	1	source	none	FALSE
AC124016.1	ENSG00000272677.1	ENSG00000272677.1:s:82374301-82374912	-0.277438605102913	0.966233811333907	7.17979926290191e-07	0.409	0.101	s|1e1.1o1|2e1.1o1	TRUE	FALSE	FALSE	2	2	0	chr4	+	ENSG00000272677.1:s:82374301-82374912_82374665-82383734	82374301	82374912	82374665	82383734			9069	chr4:82374665-82383734	chr4:82374301-82374912	611	2	source	novel_donor	FALSE
AC124016.1	ENSG00000272677.1	ENSG00000272677.1:s:82374301-82374912	0.277438603645531	0.966233798875737	7.17948687120953e-07	0.591	0.899	s|1e1.1o1|2e1.1o1	TRUE	FALSE	FALSE	2	2	1	chr4	+	ENSG00000272677.1:s:82374301-82374912_82374726-82383734	82383734	82384027	82374726	82383734			9008	chr4:82374726-82383734	chr4:82383734-82384027	293	2	source	annotated	FALSE
AL117327.1	ENSG00000281091.3	ENSG00000281091.3:s:103404777-103405096	-0.176656428877138	0.948439230882259	2.02044644126431e-07	0.214	0.029	s|1e1.1o2|2e1.1o2	TRUE	FALSE	FALSE	2	2	1	chrX	+	ENSG00000281091.3:s:103404777-103405096_103405023-103408158	103404777	103405096	103405023	103408158			3135	chrX:103405023-103408158	chrX:103404777-103405096	319	1	source	annotated	FALSE
AL117327.1	ENSG00000281091.3	ENSG00000281091.3:s:103404777-103405096	0.176656458308751	0.94843931369787	2.02035374726463e-07	0.786	0.971	s|1e1.1o2|2e1.1o2	TRUE	FALSE	FALSE	2	2	1	chrX	+	ENSG00000281091.3:s:103404777-103405096_103405096-103408158	103408158	103408299	103405096	103408158			3062	chrX:103405096-103408158	chrX:103408158-103408299	141	0	source	annotated	FALSE
AC068946.2	ENSG00000284820.1	ENSG00000284820.1:s:219214389-219214498	-0.118616237513556	0.592823292255899	3.59295991346764e-05	0.603	0.455	s|1e1.1o1|i	FALSE	FALSE	FALSE	2	2	1	chr2	-	ENSG00000284820.1:s:219214389-219214498_219214186-219214389	219214121	219214186	219214186	219214389	219214187	219214388	203	chr2:219214186-219214389	chr2:219214121-219214186	65	2	source	annotated	FALSE
AC068946.2	ENSG00000284820.1	ENSG00000284820.1:s:219214389-219214498	0.118616215516432	0.592823021715094	3.59267903482179e-05	0.397	0.545	s|1e1.1o1|i	FALSE	FALSE	FALSE	2	2	0	chr2	-	ENSG00000284820.1:s:219214389-219214498_219214187-219214388	219214389	219214498	219214187	219214388			201	chr2:219214187-219214388	chr2:219214389-219214498	109	1	source	none	FALSE
AC068946.2	ENSG00000284820.1	ENSG00000284820.1:s:219214961-219215082	-0.117522504376091	0.587684853117393	3.59939048840685e-05	0.531	0.376	s|1e1.1o1|i	FALSE	FALSE	FALSE	2	2	1	chr2	-	ENSG00000284820.1:s:219214961-219215082_219214498-219214961	219214389	219214498	219214498	219214961	219214499	219214960	463	chr2:219214498-219214961	chr2:219214389-219214498	109	1	source	annotated	FALSE
AC068946.2	ENSG00000284820.1	ENSG00000284820.1:s:219214961-219215082	0.117522477870688	0.587684478589003	3.5991165809122e-05	0.469	0.624	s|1e1.1o1|i	FALSE	FALSE	FALSE	2	2	0	chr2	-	ENSG00000284820.1:s:219214961-219215082_219214499-219214960	219214961	219215082	219214499	219214960			461	chr2:219214499-219214960	chr2:219214961-219215082	121	1	source	none	FALSE
MAP3K9	ENSG00000006432.15	ENSG00000006432.15:s:70738245-70738398	-0.106322053178676	0.5487238734601	3.74243635495874e-05	0.296	0.168	s|1e1.1o1|1e2.1o1|i	FALSE	FALSE	TRUE	3	3	1	chr14	-	ENSG00000006432.15:s:70738245-70738398_70736029-70738245	70734386	70734498	70736029	70738245	70736030	70738244	2216	chr14:70736029-70738245	chr14:70734386-70734498	112	1	source	annotated	FALSE
MAP3K9	ENSG00000006432.15	ENSG00000006432.15:s:70738245-70738398	0.0706602529930396	0.314653089267088	8.60731051463635e-05	0.651	0.754	s|1e1.1o1|1e2.1o1|i	FALSE	FALSE	TRUE	3	3	1	chr14	-	ENSG00000006432.15:s:70738245-70738398_70734498-70738245	70735961	70736029	70734498	70738245			3747	chr14:70734498-70738245	chr14:70735961-70736029	68	2	source	annotated	FALSE
MAP3K9	ENSG00000006432.15	ENSG00000006432.15:s:70738245-70738398	0.0125273806947204	0.0117340493510846	0.00115642594083514	0.055	0.08	s|1e1.1o1|1e2.1o1|i	FALSE	FALSE	TRUE	3	3	0	chr14	-	ENSG00000006432.15:s:70738245-70738398_70736030-70738244	70738245	70738398	70736030	70738244			2214	chr14:70736030-70738244	chr14:70738245-70738398	153	0	source	none	FALSE
PHF7	ENSG00000010318.21	ENSG00000010318.21:s:52410660-52411339	-0.157789369677937	0.786097605722625	1.59808363504599e-05	0.596	0.407	s|1e1.1o3|2e1.1o3|i	TRUE	FALSE	FALSE	3	2	1	chr3	+	ENSG00000010318.21:s:52410660-52411339_52411247-52412811	52410660	52411339	52411247	52412811	52411340	52412810	1564	chr3:52411247-52412811	chr3:52410660-52411339	679	1	source	annotated	FALSE
PHF7	ENSG00000010318.21	ENSG00000010318.21:s:52410660-52411339	0.154057293891696	0.786332224512395	1.52077674669757e-05	0.21	0.392	s|1e1.1o3|2e1.1o3|i	TRUE	FALSE	FALSE	3	2	1	chr3	+	ENSG00000010318.21:s:52410660-52411339_52411339-52412811	52412811	52412920	52411339	52412811			1472	chr3:52411339-52412811	chr3:52412811-52412920	109	1	source	annotated	FALSE
PHF7	ENSG00000010318.21	ENSG00000010318.21:s:52410660-52411339	0.00321179650828403	0.0206543331215277	0.000771412574728736	0.194	0.2	s|1e1.1o3|2e1.1o3|i	TRUE	FALSE	FALSE	3	2	0	chr3	+	ENSG00000010318.21:s:52410660-52411339_52411340-52412810			52411340	52412810			1470	chr3:52411340-52412810	chr3:NA-NA			source	none	FALSE
ANGEL1	ENSG00000013523.9	ENSG00000013523.9:t:76803786-76803912	0.109419325457009	0.543741932236185	4.17569645890568e-05	0.17	0.319	t|1e1.1o1|1e2.1o1|i	FALSE	FALSE	TRUE	3	3	1	chr14	-	ENSG00000013523.9:t:76803786-76803912_76803912-76806416	76803786	76803912	76803912	76806416	76803913	76804374	2504	chr14:76803912-76806416	chr14:76803786-76803912	126	0	target	annotated	FALSE
ANGEL1	ENSG00000013523.9	ENSG00000013523.9:t:76803786-76803912	-0.104439523901506	0.507411898408984	4.72384249231572e-05	0.524	0.374	t|1e1.1o1|1e2.1o1|i	FALSE	FALSE	TRUE	3	3	1	chr14	-	ENSG00000013523.9:t:76803786-76803912_76803912-76804375	76804375	76804435	76803912	76804375			463	chr14:76803912-76804375	chr14:76804375-76804435	60	0	target	annotated	FALSE
ANGEL1	ENSG00000013523.9	ENSG00000013523.9:t:76803786-76803912	0.0020862758365655	0.0502604015717936	0.000393966105764421	0.304	0.308	t|1e1.1o1|1e2.1o1|i	FALSE	FALSE	TRUE	3	3	1	chr14	-	ENSG00000013523.9:t:76803786-76803912_76803913-76804374	76806416	76806849	76803913	76804374			461	chr14:76803913-76804374	chr14:76806416-76806849	433	1	target	none	FALSE
PSD	ENSG00000059915.17	ENSG00000059915.17:s:102418701-102418785	0.348512749295808	1	4.58835690327666e-22	0.002	0.369	s|1e1.1o1|1e2.1o1	FALSE	FALSE	TRUE	2	3	0	chr10	-	ENSG00000059915.17:s:102418701-102418785_102418046-102418701	102416654	102417121	102418046	102418701			655	chr10:102418046-102418701	chr10:102416654-102417121	467	2	source	novel_acceptor	TRUE
PSD	ENSG00000059915.17	ENSG00000059915.17:s:102418701-102418785	-0.348512797882164	1	0	0.998	0.631	s|1e1.1o1|1e2.1o1	FALSE	FALSE	TRUE	2	3	1	chr10	-	ENSG00000059915.17:s:102418701-102418785_102417121-102418701	102417908	102418046	102417121	102418701			1580	chr10:102417121-102418701	chr10:102417908-102418046	138	0	source	annotated	FALSE
PSD	ENSG00000059915.17	ENSG00000059915.17:t:102416654-102417121	-0.307142598249565	0.999999999539037	0	0.944	0.64	t|1e1.1o1|1e2.1o2|1e2.2o2|i	TRUE	FALSE	TRUE	4	3	1	chr10	-	ENSG00000059915.17:t:102416654-102417121_102417121-102418701	102416654	102417121	102417121	102418701	102417122	102417908	1580	chr10:102417121-102418701	chr10:102416654-102417121	467	2	target	annotated	FALSE
PSD	ENSG00000059915.17	ENSG00000059915.17:t:102416654-102417121	0.176943434184619	0.996810564554762	1.20179904168499e-12	0.002	0.201	t|1e1.1o1|1e2.1o2|1e2.2o2|i	TRUE	FALSE	TRUE	4	3	0	chr10	-	ENSG00000059915.17:t:102416654-102417121_102417121-102417940	102417908	102418046	102417121	102417940			819	chr10:102417121-102417940	chr10:102417908-102418046	138	0	target	novel_donor	TRUE
PSD	ENSG00000059915.17	ENSG00000059915.17:t:102416654-102417121	0.00126955164329706	9.88448778383653e-09	0.473279198557983	0	0.036	t|1e1.1o1|1e2.1o2|1e2.2o2|i	TRUE	FALSE	TRUE	4	3	0	chr10	-	ENSG00000059915.17:t:102416654-102417121_102417121-102417908	102418701	102418785	102417121	102417908			787	chr10:102417121-102417908	chr10:102418701-102418785	84	0	target	novel_donor	FALSE
PSD	ENSG00000059915.17	ENSG00000059915.17:t:102416654-102417121	0.0580597004152289	0.13483613282502	0.000255443917563107	0.054	0.121	t|1e1.1o1|1e2.1o2|1e2.2o2|i	TRUE	FALSE	TRUE	4	3	0	chr10	-	ENSG00000059915.17:t:102416654-102417121_102417122-102417908			102417122	102417908			786	chr10:102417122-102417908	chr10:NA-NA			target	none	FALSE
PMS1	ENSG00000064933.17	ENSG00000064933.17:s:189805652-189805754	0.109075862734305	0.52739796070164	4.57500467473962e-06	0.056	0.205	s|1e1.1o1|1e2.1o2	FALSE	FALSE	TRUE	2	3	1	chr2	+	ENSG00000064933.17:s:189805652-189805754_189805754-189806423	189805652	189805754	189805754	189806423			669	chr2:189805754-189806423	chr2:189805652-189805754	102	0	source	annotated	FALSE
PMS1	ENSG00000064933.17	ENSG00000064933.17:s:189805652-189805754	-0.109075912988566	0.527398458748393	4.5752542002786e-06	0.944	0.795	s|1e1.1o1|1e2.1o2	FALSE	FALSE	TRUE	2	3	1	chr2	+	ENSG00000064933.17:s:189805652-189805754_189805754-189818017	189806423	189807054	189805754	189818017			12263	chr2:189805754-189818017	chr2:189806423-189807054	631	1	source	annotated	FALSE
SCARB1	ENSG00000073060.16	ENSG00000073060.16:t:124817550-124817707	-0.166203186964197	0.881130575845986	5.10217824656323e-07	0.978	0.794	t|1e1.1o1|1e2.1o1	FALSE	FALSE	TRUE	2	3	1	chr12	-	ENSG00000073060.16:t:124817550-124817707_124817707-124863595	124817550	124817707	124817707	124863595			45888	chr12:124817707-124863595	chr12:124817550-124817707	157	1	target	annotated	FALSE
SCARB1	ENSG00000073060.16	ENSG00000073060.16:t:124817550-124817707	0.166203141772686	0.881130382452438	5.10193691684875e-07	0.022	0.206	t|1e1.1o1|1e2.1o1	FALSE	FALSE	TRUE	2	3	1	chr12	-	ENSG00000073060.16:t:124817550-124817707_124817707-124862380	124862380	124862497	124817707	124862380			44673	chr12:124817707-124862380	chr12:124862380-124862497	117	0	target	annotated	FALSE
NEBL	ENSG00000078114.18	ENSG00000078114.18:s:20957731-20957815	0.239154335935971	0.930120788289247	1.05055945913173e-06	0.506	0.781	s|1e1.1o1|1e2.2o2	FALSE	FALSE	TRUE	2	3	0	chr10	-	ENSG00000078114.18:s:20957731-20957815_20945425-20957731	20899378	20899691	20945425	20957731			12306	chr10:20945425-20957731	chr10:20899378-20899691	313	1	source	none	FALSE
NEBL	ENSG00000078114.18	ENSG00000078114.18:s:20957731-20957815	-0.239154339853527	0.930120758089458	1.05060770705379e-06	0.494	0.219	s|1e1.1o1|1e2.2o2	FALSE	FALSE	TRUE	2	3	0	chr10	-	ENSG00000078114.18:s:20957731-20957815_20899450-20957731	20945338	20945425	20899450	20957731			58281	chr10:20899450-20957731	chr10:20945338-20945425	87	0	source	none	FALSE
NEBL	ENSG00000078114.18	ENSG00000078114.18:t:20817598-20817692	0.0622838004781604	0.283418432646522	9.55614852430568e-05	0.294	0.406	t|1e1.1o1|1e2.1o1|i	FALSE	FALSE	TRUE	3	3	1	chr10	-	ENSG00000078114.18:t:20817598-20817692_20817692-20819424	20817598	20817692	20817692	20819424	20817693	20818703	1732	chr10:20817692-20819424	chr10:20817598-20817692	94	1	target	annotated	FALSE
NEBL	ENSG00000078114.18	ENSG00000078114.18:t:20817598-20817692	-0.121044688115504	0.587556193131924	3.70489628872539e-05	0.526	0.352	t|1e1.1o1|1e2.1o1|i	FALSE	FALSE	TRUE	3	3	1	chr10	-	ENSG00000078114.18:t:20817598-20817692_20817692-20818704	20818704	20818834	20817692	20818704			1012	chr10:20817692-20818704	chr10:20818704-20818834	130	1	target	annotated	FALSE
NEBL	ENSG00000078114.18	ENSG00000078114.18:t:20817598-20817692	0.0269104207532777	0.0998528274007917	0.000233642984598305	0.18	0.244	t|1e1.1o1|1e2.1o1|i	FALSE	FALSE	TRUE	3	3	0	chr10	-	ENSG00000078114.18:t:20817598-20817692_20817693-20818703	20819424	20819516	20817693	20818703			1010	chr10:20817693-20818703	chr10:20819424-20819516	92	2	target	none	FALSE
NEBL	ENSG00000078114.18	ENSG00000078114.18:t:20899378-20899691	-0.10343313884635	0.472945120731924	6.17024867710647e-06	0.506	0.33	t|1e1.1o1|1e2.1o1	FALSE	FALSE	TRUE	2	3	0	chr10	-	ENSG00000078114.18:t:20899378-20899691_20899450-20957731	20899378	20899691	20899450	20957731			58281	chr10:20899450-20957731	chr10:20899378-20899691	313	1	target	none	FALSE
NEBL	ENSG00000078114.18	ENSG00000078114.18:t:20899378-20899691	0.103433111326297	0.472944832513149	6.16998223499504e-06	0.494	0.67	t|1e1.1o1|1e2.1o1	FALSE	FALSE	TRUE	2	3	0	chr10	-	ENSG00000078114.18:t:20899378-20899691_20899450-20945338	20945338	20945425	20899450	20945338			45888	chr10:20899450-20945338	chr10:20945338-20945425	87	0	target	none	FALSE
FAM135A	ENSG00000082269.16	ENSG00000082269.16:s:70523967-70524121	-0.207728808805158	0.934505141316813	6.36629147399148e-07	0.443	0.219	s|1e1.1o1|1e2.1o1	FALSE	FALSE	TRUE	2	3	1	chr6	+	ENSG00000082269.16:s:70523967-70524121_70524121-70524343	70523967	70524121	70524121	70524343			222	chr6:70524121-70524343	chr6:70523967-70524121	154	1	source	annotated	FALSE
FAM135A	ENSG00000082269.16	ENSG00000082269.16:s:70523967-70524121	0.20772884343432	0.934505169180193	6.36599627770178e-07	0.557	0.781	s|1e1.1o1|1e2.1o1	FALSE	FALSE	TRUE	2	3	1	chr6	+	ENSG00000082269.16:s:70523967-70524121_70524121-70524931	70524343	70524608	70524121	70524931			810	chr6:70524121-70524931	chr6:70524343-70524608	265	1	source	annotated	FALSE
HECTD1	ENSG00000092148.13	ENSG00000092148.13:s:31207391-31207804	0.105054779517786	0.532153273134036	4.20621240143508e-05	0.412	0.542	s|1e1.2o2|i	FALSE	FALSE	FALSE	2	2	1	chr14	-	ENSG00000092148.13:s:31207391-31207804_31205957-31207391	31205797	31206176	31205957	31207391	31207318	31207390	1434	chr14:31205957-31207391	chr14:31205797-31206176	379	1	source	annotated	FALSE
HECTD1	ENSG00000092148.13	ENSG00000092148.13:s:31207391-31207804	-0.105054792282759	0.5321535127024	4.20654888618754e-05	0.588	0.458	s|1e1.2o2|i	FALSE	FALSE	FALSE	2	2	1	chr14	-	ENSG00000092148.13:s:31207391-31207804_31207318-31207390	31207391	31207804	31207318	31207390			72	chr14:31207318-31207390	chr14:31207391-31207804	413	2	source	none	FALSE
BCL2L13	ENSG00000099968.17	ENSG00000099968.17:t:17726677-17730855	0.0293853651494673	0.00421316563348328	0.000544658417551189	0.036	0.065	t|1e1.1o1|1e2.2o2|1e3.2o4|2e4.1o1	FALSE	TRUE	TRUE	4	5	1	chr22	+	ENSG00000099968.17:t:17726677-17730855_17689142-17726677		17722390	17689142	17726677			37535	chr22:17689142-17726677	chr22:nan-17722390			target	annotated	FALSE
BCL2L13	ENSG00000099968.17	ENSG00000099968.17:t:17726677-17730855	-0.0111830183408772	0.00125991365154369	0.000850532909217772	0.069	0.053	t|1e1.1o1|1e2.2o2|1e3.2o4|2e4.1o1	FALSE	TRUE	TRUE	4	5	1	chr22	+	ENSG00000099968.17:t:17726677-17730855_17696210-17726677	17688986	17689142	17696210	17726677			30467	chr22:17696210-17726677	chr22:17688986-17689142	156	0	target	annotated	FALSE
BCL2L13	ENSG00000099968.17	ENSG00000099968.17:t:17726677-17730855	-0.145672892380792	0.822252255168698	5.94236516771041e-07	0.887	0.735	t|1e1.1o1|1e2.2o2|1e3.2o4|2e4.1o1	FALSE	TRUE	TRUE	4	5	1	chr22	+	ENSG00000099968.17:t:17726677-17730855_17702386-17726677	17695738	17696210	17702386	17726677			24291	chr22:17702386-17726677	chr22:17695738-17696210	472	1	target	annotated	FALSE
BCL2L13	ENSG00000099968.17	ENSG00000099968.17:t:17726677-17730855	0.119488277171376	0.688199236963782	4.04752537483614e-07	0.007	0.147	t|1e1.1o1|1e2.2o2|1e3.2o4|2e4.1o1	FALSE	TRUE	TRUE	4	5	0	chr22	+	ENSG00000099968.17:t:17726677-17730855_17722390-17726691	17702243	17703733	17722390	17726691			4301	chr22:17722390-17726691	chr22:17702243-17703733	1490	2	target	none	TRUE
NDRG3	ENSG00000101079.21	ENSG00000101079.21:s:36721679-36721787	-0.118618067671272	0.625497783684152	2.70413249081614e-06	0.801	0.666	s|1e1.1o1|1e2.1o1	FALSE	FALSE	TRUE	2	3	1	chr20	-	ENSG00000101079.21:s:36721679-36721787_36707007-36721679	36688679	36688784	36707007	36721679			14672	chr20:36707007-36721679	chr20:36688679-36688784	105	0	source	annotated	FALSE
NDRG3	ENSG00000101079.21	ENSG00000101079.21:s:36721679-36721787	0.11861803316723	0.625497561550427	2.70397959123036e-06	0.199	0.334	s|1e1.1o1|1e2.1o1	FALSE	FALSE	TRUE	2	3	1	chr20	-	ENSG00000101079.21:s:36721679-36721787_36688784-36721679	36706972	36707007	36688784	36721679			32895	chr20:36688784-36721679	chr20:36706972-36707007	35	2	source	annotated	FALSE
FGF14	ENSG00000102466.15	ENSG00000102466.15:t:101875186-101875296	0.174273975922273	0.868890691447408	1.01462765652563e-06	0.671	0.867	t|1e1.1o1|1e2.1o1	FALSE	FALSE	TRUE	2	3	1	chr13	-	ENSG00000102466.15:t:101875186-101875296_101875296-102401471	101875186	101875296	101875296	102401471			526175	chr13:101875296-102401471	chr13:101875186-101875296	110	2	target	annotated	FALSE
FGF14	ENSG00000102466.15	ENSG00000102466.15:t:101875186-101875296	-0.174274012766024	0.868890821079514	1.01467673863098e-06	0.329	0.133	t|1e1.1o1|1e2.1o1	FALSE	FALSE	TRUE	2	3	1	chr13	-	ENSG00000102466.15:t:101875186-101875296_101875296-101916453	101916453	101916645	101875296	101916453			41157	chr13:101875296-101916453	chr13:101916453-101916645	192	0	target	annotated	FALSE
CAPN15	ENSG00000103326.12	ENSG00000103326.12:t:546817-547392	0.152144913044224	0.792538640956746	1.35269427994118e-06	0.022	0.205	t|1e1.1o1|1e2.1o1	FALSE	FALSE	TRUE	2	3	1	chr16	+	ENSG00000103326.12:t:546817-547392_533998-546817	533946	533998	533998	546817			12819	chr16:533998-546817	chr16:533946-533998	52	1	target	annotated	FALSE
CAPN15	ENSG00000103326.12	ENSG00000103326.12:t:546817-547392	-0.152144949493946	0.792538939573526	1.35276234569659e-06	0.978	0.795	t|1e1.1o1|1e2.1o1	FALSE	FALSE	TRUE	2	3	1	chr16	+	ENSG00000103326.12:t:546817-547392_540371-546817	540093	540371	540371	546817			6446	chr16:540371-546817	chr16:540093-540371	278	2	target	annotated	FALSE
ZFAND1	ENSG00000104231.11	ENSG00000104231.11:s:81718182-81718224	0.130846853502741	0.783978216138015	1.60740591688983e-07	0.841	0.982	s|1e1.1o1|1e2.1o2	FALSE	FALSE	TRUE	2	3	1	chr8	-	ENSG00000104231.11:s:81718182-81718224_81717288-81718182	81714987	81715114	81717288	81718182			894	chr8:81717288-81718182	chr8:81714987-81715114	127	1	source	annotated	FALSE
ZFAND1	ENSG00000104231.11	ENSG00000104231.11:s:81718182-81718224	-0.130846794778475	0.783977821294682	1.60750244226904e-07	0.159	0.018	s|1e1.1o1|1e2.1o2	FALSE	FALSE	TRUE	2	3	1	chr8	-	ENSG00000104231.11:s:81718182-81718224_81715114-81718182	81717245	81717288	81715114	81718182			3068	chr8:81715114-81718182	chr8:81717245-81717288	43	1	source	annotated	FALSE
SPATA6L	ENSG00000106686.16	ENSG00000106686.16:s:4666212-4666307	0.112178291028758	0.58413858863548	3.35648955445412e-05	0.082	0.219	s|1e1.1o1|i	FALSE	FALSE	FALSE	2	2	1	chr9	-	ENSG00000106686.16:s:4666212-4666307_4662036-4666212	4661899	4662036	4662036	4666212	4663411	4666211	4176	chr9:4662036-4666212	chr9:4661899-4662036	137	2	source	annotated	FALSE
SPATA6L	ENSG00000106686.16	ENSG00000106686.16:s:4666212-4666307	-0.112178315872137	0.584138857832464	3.35675946904201e-05	0.918	0.781	s|1e1.1o1|i	FALSE	FALSE	FALSE	2	2	0	chr9	-	ENSG00000106686.16:s:4666212-4666307_4663411-4666211	4666212	4666307	4663411	4666211			2800	chr9:4663411-4666211	chr9:4666212-4666307	95	2	source	none	FALSE
PLEKHA1	ENSG00000107679.14	ENSG00000107679.14:t:122392303-122392372	0.106728931888311	0.544308793775796	3.59559163003904e-06	0.713	0.843	t|1e1.1o1|1e2.2o2|1e3.1o1|1e4.1o1	FALSE	FALSE	TRUE	4	5	0	chr10	+	ENSG00000107679.14:t:122392303-122392372_122374806-122392303		122375552	122374806	122392303			17497	chr10:122374806-122392303	chr10:nan-122375552			target	novel_combo	FALSE
PLEKHA1	ENSG00000107679.14	ENSG00000107679.14:t:122392303-122392372	6.90509517511075e-05	1.02514752058823e-06	0.0215076825814865	0.019	0.016	t|1e1.1o1|1e2.2o2|1e3.1o1|1e4.1o1	FALSE	FALSE	TRUE	4	5	1	chr10	+	ENSG00000107679.14:t:122392303-122392372_122374961-122392303		122375559	122374961	122392303			17342	chr10:122374961-122392303	chr10:nan-122375559			target	annotated	FALSE
PLEKHA1	ENSG00000107679.14	ENSG00000107679.14:t:122392303-122392372	-0.0532601616707612	0.134804003935263	2.00381435027097e-05	0.144	0.07	t|1e1.1o1|1e2.2o2|1e3.1o1|1e4.1o1	FALSE	FALSE	TRUE	4	5	0	chr10	+	ENSG00000107679.14:t:122392303-122392372_122375552-122392303	122374696	122374806	122375552	122392303			16751	chr10:122375552-122392303	chr10:122374696-122374806	110	2	target	novel_donor	FALSE
PLEKHA1	ENSG00000107679.14	ENSG00000107679.14:t:122392303-122392372	-0.0356975724213297	0.05091823310824	4.6165273876686e-05	0.124	0.071	t|1e1.1o1|1e2.2o2|1e3.1o1|1e4.1o1	FALSE	FALSE	TRUE	4	5	0	chr10	+	ENSG00000107679.14:t:122392303-122392372_122375559-122392303	122374834	122374961	122375559	122392303			16744	chr10:122375559-122392303	chr10:122374834-122374961	127	1	target	novel_donor	FALSE
WWC1	ENSG00000113645.14	ENSG00000113645.14:s:168464711-168464962	-0.197444789071414	0.806287059204766	2.48885916975805e-06	0.632	0.378	s|1e1.2o3|1e1.3o3	FALSE	TRUE	FALSE	2	2	1	chr5	+	ENSG00000113645.14:s:168464711-168464962_168464962-168467840	168464711	168464962	168464962	168467840			2878	chr5:168464962-168467840	chr5:168464711-168464962	251	2	source	annotated	FALSE
WWC1	ENSG00000113645.14	ENSG00000113645.14:s:168464711-168464962	0.197444781234497	0.80628697181495	2.48874506111971e-06	0.368	0.622	s|1e1.2o3|1e1.3o3	FALSE	TRUE	FALSE	2	2	1	chr5	+	ENSG00000113645.14:s:168464711-168464962_168464962-168467843	168467693	168467964	168464962	168467843			2881	chr5:168464962-168467843	chr5:168467693-168467964	271	1	source	annotated	FALSE
RALGPS2	ENSG00000116191.17	ENSG00000116191.17:t:178877498-178877635	-0.153694008805176	0.717292126965714	2.83786615529191e-06	0.364	0.16	t|1e1.1o1|1e2.1o1	FALSE	FALSE	TRUE	2	3	0	chr1	+	ENSG00000116191.17:t:178877498-178877635_178821704-178877498	178821612	178821704	178821704	178877498			55794	chr1:178821704-178877498	chr1:178821612-178821704	92	2	target	novel_exon_skip	FALSE
RALGPS2	ENSG00000116191.17	ENSG00000116191.17:t:178877498-178877635	0.153693971680912	0.717291901800608	2.83772902270841e-06	0.636	0.84	t|1e1.1o1|1e2.1o1	FALSE	FALSE	TRUE	2	3	1	chr1	+	ENSG00000116191.17:t:178877498-178877635_178833550-178877498	178833424	178833550	178833550	178877498			43948	chr1:178833550-178877498	chr1:178833424-178833550	126	0	target	annotated	FALSE
B4GALT2	ENSG00000117411.16	ENSG00000117411.16:t:43981109-43981473	-0.169169099984918	0.938456293852491	3.37334517319654e-07	0.808	0.634	t|1e1.1o2|1e1.2o2|1e2.1o2|1e2.2o2|2e3.1o2|i	TRUE	TRUE	TRUE	6	4	1	chr1	+	ENSG00000117411.16:t:43981109-43981473_43979511-43981109	43979202	43979616	43979511	43981109	43980615	43981108	1598	chr1:43979511-43981109	chr1:43979202-43979616	414	0	target	annotated	FALSE
B4GALT2	ENSG00000117411.16	ENSG00000117411.16:t:43981109-43981473	-0.024963199720215	5.23528561201645e-06	0.432652097999967	0.055	0.026	t|1e1.1o2|1e1.2o2|1e2.1o2|1e2.2o2|2e3.1o2|i	TRUE	TRUE	TRUE	6	4	1	chr1	+	ENSG00000117411.16:t:43981109-43981473_43979616-43981109	43979877	43980614	43979616	43981109			1493	chr1:43979616-43981109	chr1:43979877-43980614	737	2	target	annotated	FALSE
B4GALT2	ENSG00000117411.16	ENSG00000117411.16:t:43981109-43981473	7.77155985295739e-16	7.29950855916768e-21	0.999999999007135	0	0.007	t|1e1.1o2|1e1.2o2|1e2.1o2|1e2.2o2|2e3.1o2|i	TRUE	TRUE	TRUE	6	4	1	chr1	+	ENSG00000117411.16:t:43981109-43981473_43980046-43981109	43981109	43981473	43980046	43981109			1063	chr1:43980046-43981109	chr1:43981109-43981473	364	1	target	annotated	FALSE
B4GALT2	ENSG00000117411.16	ENSG00000117411.16:t:43981109-43981473	0.0938940781191612	0.455413180267038	2.18312683643331e-05	0.025	0.118	t|1e1.1o2|1e1.2o2|1e2.1o2|1e2.2o2|2e3.1o2|i	TRUE	TRUE	TRUE	6	4	1	chr1	+	ENSG00000117411.16:t:43981109-43981473_43980614-43981109			43980614	43981109			495	chr1:43980614-43981109	chr1:NA-NA			target	annotated	FALSE
B4GALT2	ENSG00000117411.16	ENSG00000117411.16:t:43981109-43981473	0.013364618614893	0.000117982956109285	0.0963992779303804	0.079	0.101	t|1e1.1o2|1e1.2o2|1e2.1o2|1e2.2o2|2e3.1o2|i	TRUE	TRUE	TRUE	6	4	0	chr1	+	ENSG00000117411.16:t:43981109-43981473_43979511-43981114			43979511	43981114			1603	chr1:43979511-43981114	chr1:NA-NA			target	novel_acceptor	FALSE
B4GALT2	ENSG00000117411.16	ENSG00000117411.16:t:43981109-43981473	0.0833845108928272	0.35325354240785	5.25897697387692e-05	0.033	0.112	t|1e1.1o2|1e1.2o2|1e2.1o2|1e2.2o2|2e3.1o2|i	TRUE	TRUE	TRUE	6	4	0	chr1	+	ENSG00000117411.16:t:43981109-43981473_43980615-43981108			43980615	43981108			493	chr1:43980615-43981108	chr1:NA-NA			target	none	FALSE
DDX59	ENSG00000118197.14	ENSG00000118197.14:t:200650425-200650676	-0.129353834236895	0.687121728378939	2.02310079477908e-06	0.975	0.821	t|1e1.1o1|1e2.1o1	FALSE	FALSE	TRUE	2	3	1	chr1	-	ENSG00000118197.14:t:200650425-200650676_200650676-200659027	200650425	200650676	200650676	200659027			8351	chr1:200650676-200659027	chr1:200650425-200650676	251	2	target	annotated	FALSE
DDX59	ENSG00000118197.14	ENSG00000118197.14:t:200650425-200650676	0.129353774635147	0.687121163433093	2.02299334404596e-06	0.025	0.179	t|1e1.1o1|1e2.1o1	FALSE	FALSE	TRUE	2	3	1	chr1	-	ENSG00000118197.14:t:200650425-200650676_200650676-200654441	200654441	200654582	200650676	200654441			3765	chr1:200650676-200654441	chr1:200654441-200654582	141	0	target	annotated	FALSE
ACYP1	ENSG00000119640.9	ENSG00000119640.9:t:75056447-75056560	-0.160873015306165	0.810154715132533	1.25046833666653e-05	0.987	0.781	t|1e1.1o2|i	FALSE	FALSE	FALSE	2	2	0	chr14	-	ENSG00000119640.9:t:75056447-75056560_75056560-75063470	75056447	75056560	75056560	75063470	75056561	75059847	6910	chr14:75056560-75063470	chr14:75056447-75056560	113	2	target	novel_acceptor	FALSE
ACYP1	ENSG00000119640.9	ENSG00000119640.9:t:75056447-75056560	0.160872983690151	0.810154284667783	1.25037240583822e-05	0.013	0.219	t|1e1.1o2|i	FALSE	FALSE	FALSE	2	2	0	chr14	-	ENSG00000119640.9:t:75056447-75056560_75056561-75059847	75063023	75063561	75056561	75059847			3286	chr14:75056561-75059847	chr14:75063023-75063561	538	1	target	none	TRUE
IQSEC3	ENSG00000120645.11	ENSG00000120645.11:s:171112-171161	-0.100836175877019	0.495474227739311	4.70080089676195e-06	0.277	0.14	s|1e1.1o1|1e2.1o2|1e2.2o2	FALSE	TRUE	TRUE	3	3	1	chr12	+	ENSG00000120645.11:s:171112-171161_171161-171247	171112	171161	171161	171247			86	chr12:171161-171247	chr12:171112-171161	49	1	source	annotated	FALSE
IQSEC3	ENSG00000120645.11	ENSG00000120645.11:s:171112-171161	-0.0151806868872965	0.0700489436289949	2.820215666266e-05	0.307	0.273	s|1e1.1o1|1e2.1o2|1e2.2o2	FALSE	TRUE	TRUE	3	3	1	chr12	+	ENSG00000120645.11:s:171112-171161_171161-174599	171247	171466	171161	174599			3438	chr12:171161-174599	chr12:171247-171466	219	0	source	annotated	FALSE
IQSEC3	ENSG00000120645.11	ENSG00000120645.11:s:171112-171161	0.120888066203285	0.579178960520883	4.17344509114417e-06	0.418	0.585	s|1e1.1o1|1e2.1o2|1e2.2o2	FALSE	TRUE	TRUE	3	3	1	chr12	+	ENSG00000120645.11:s:171112-171161_171161-174616	174599	174910	171161	174616			3455	chr12:171161-174616	chr12:174599-174910	311	2	source	annotated	FALSE
IFT81	ENSG00000122970.16	ENSG00000122970.16:s:110124335-110124861	0.212980844470736	0.970124970084558	1.23276531069585e-06	0.45	0.675	s|1e1.1o2|2e1.1o2|i	TRUE	FALSE	FALSE	3	2	1	chr12	+	ENSG00000122970.16:s:110124335-110124861_110124443-110127360	110124335	110124861	110124443	110127360	110124862	110127359	2917	chr12:110124443-110127360	chr12:110124335-110124861	526	1	source	annotated	FALSE
IFT81	ENSG00000122970.16	ENSG00000122970.16:s:110124335-110124861	-0.194766058451889	0.943876439419436	2.6723969178688e-06	0.518	0.31	s|1e1.1o2|2e1.1o2|i	TRUE	FALSE	FALSE	3	2	1	chr12	+	ENSG00000122970.16:s:110124335-110124861_110124861-110127360	110127360	110127524	110124861	110127360			2499	chr12:110124861-110127360	chr12:110127360-110127524	164	2	source	annotated	FALSE
IFT81	ENSG00000122970.16	ENSG00000122970.16:s:110124335-110124861	-0.00157861708564146	2.49165039523233e-06	0.274432967987888	0.03	0.014	s|1e1.1o2|2e1.1o2|i	TRUE	FALSE	FALSE	3	2	0	chr12	+	ENSG00000122970.16:s:110124335-110124861_110124862-110127359			110124862	110127359			2497	chr12:110124862-110127359	chr12:NA-NA			source	none	FALSE
GRM4	ENSG00000124493.13	ENSG00000124493.13:t:34133652-34133859	0.198496333997404	0.922013750061012	7.17914920729588e-07	0.064	0.284	t|1e1.1o1|1e2.1o1	FALSE	FALSE	TRUE	2	3	1	chr6	-	ENSG00000124493.13:t:34133652-34133859_34133859-34146000	34133652	34133859	34133859	34146000			12141	chr6:34133859-34146000	chr6:34133652-34133859	207	0	target	annotated	FALSE
GRM4	ENSG00000124493.13	ENSG00000124493.13:t:34133652-34133859	-0.1984963126324	0.922013695083642	7.17948463568874e-07	0.936	0.716	t|1e1.1o1|1e2.1o1	FALSE	FALSE	TRUE	2	3	0	chr6	-	ENSG00000124493.13:t:34133652-34133859_34133859-34145088	34145088		34133859	34145088			11229	chr6:34133859-34145088	chr6:34145088-nan			target	novel_donor	FALSE
GRK4	ENSG00000125388.20	ENSG00000125388.20:s:2963571-2964122	0.120478601966727	0.627618180003612	2.98093860644191e-05	0.444	0.592	s|1e1.1o1|1e2.1o1|1e3.1o1|1e4.1o1|i	FALSE	FALSE	TRUE	5	5	1	chr4	+	ENSG00000125388.20:s:2963571-2964122_2964122-2965243	2963571	2964122	2964122	2965243	2964123	2965242	1121	chr4:2964122-2965243	chr4:2963571-2964122	551	2	source	annotated	FALSE
GRK4	ENSG00000125388.20	ENSG00000125388.20:s:2963571-2964122	-4.80112179771281e-05	8.89664469377589e-09	0.440785791019111	0.018	0.007	s|1e1.1o1|1e2.1o1|1e3.1o1|1e4.1o1|i	FALSE	FALSE	TRUE	5	5	1	chr4	+	ENSG00000125388.20:s:2963571-2964122_2964122-2984513	2965243	2966889	2964122	2984513			20391	chr4:2964122-2984513	chr4:2965243-2966889	1646	2	source	annotated	FALSE
GRK4	ENSG00000125388.20	ENSG00000125388.20:s:2963571-2964122	0.0149489712339505	0.0017233588989106	0.00918989204848582	0.03	0.055	s|1e1.1o1|1e2.1o1|1e3.1o1|1e4.1o1|i	FALSE	FALSE	TRUE	5	5	1	chr4	+	ENSG00000125388.20:s:2963571-2964122_2964122-2988727	2984513	2984608	2964122	2988727			24605	chr4:2964122-2988727	chr4:2984513-2984608	95	2	source	annotated	FALSE
GRK4	ENSG00000125388.20	ENSG00000125388.20:s:2963571-2964122	-0.0794878461603456	0.359304517784722	7.33870713465201e-05	0.27	0.166	s|1e1.1o1|1e2.1o1|1e3.1o1|1e4.1o1|i	FALSE	FALSE	TRUE	5	5	0	chr4	+	ENSG00000125388.20:s:2963571-2964122_2964122-2992215	2988727	2988839	2964122	2992215			28093	chr4:2964122-2992215	chr4:2988727-2988839	112	1	source	novel_exon_skip	FALSE
GRK4	ENSG00000125388.20	ENSG00000125388.20:s:2963571-2964122	-0.031789476804862	0.0879878472927393	0.000266983441749802	0.238	0.18	s|1e1.1o1|1e2.1o1|1e3.1o1|1e4.1o1|i	FALSE	FALSE	TRUE	5	5	0	chr4	+	ENSG00000125388.20:s:2963571-2964122_2964123-2965242	2992215	2992292	2964123	2965242			1119	chr4:2964123-2965242	chr4:2992215-2992292	77	2	source	none	FALSE
GRK4	ENSG00000125388.20	ENSG00000125388.20:s:3029201-3029409	0.00146784553078582	0.0590121019173136	3.21362827852001e-05	0.332	0.335	s|1e1.1o1|1e2.1o1|1e3.1o1	FALSE	FALSE	TRUE	3	4	1	chr4	+	ENSG00000125388.20:s:3029201-3029409_3029409-3035386	3029201	3029409	3029409	3035386			5977	chr4:3029409-3035386	chr4:3029201-3029409	208	1	source	annotated	FALSE
GRK4	ENSG00000125388.20	ENSG00000125388.20:s:3029201-3029409	0.128259539747752	0.651021463632743	2.93110824163307e-06	0.113	0.27	s|1e1.1o1|1e2.1o1|1e3.1o1	FALSE	FALSE	TRUE	3	4	1	chr4	+	ENSG00000125388.20:s:3029201-3029409_3029409-3037374	3035386	3035523	3029409	3037374			7965	chr4:3029409-3037374	chr4:3035386-3035523	137	2	source	annotated	FALSE
GRK4	ENSG00000125388.20	ENSG00000125388.20:s:3029201-3029409	-0.111413615438022	0.529862854030519	4.82180619765238e-06	0.553	0.39	s|1e1.1o1|1e2.1o1|1e3.1o1	FALSE	FALSE	TRUE	3	4	1	chr4	+	ENSG00000125388.20:s:3029201-3029409_3029409-3040572	3037374	3037511	3029409	3040572			11163	chr4:3029409-3040572	chr4:3037374-3037511	137	2	source	annotated	FALSE
GRK4	ENSG00000125388.20	ENSG00000125388.20:s:3037374-3037511	0.15632011025819	0.722200656302217	2.41854344904582e-05	0.195	0.404	s|1e1.1o1|1e2.1o1|i	FALSE	FALSE	TRUE	3	3	1	chr4	+	ENSG00000125388.20:s:3037374-3037511_3037511-3038376	3037374	3037511	3037511	3038376	3037512	3038375	865	chr4:3037511-3038376	chr4:3037374-3037511	137	2	source	annotated	FALSE
GRK4	ENSG00000125388.20	ENSG00000125388.20:s:3037374-3037511	-0.0779433105729423	0.366862954303029	7.41233579457656e-05	0.478	0.34	s|1e1.1o1|1e2.1o1|i	FALSE	FALSE	TRUE	3	3	1	chr4	+	ENSG00000125388.20:s:3037374-3037511_3037511-3040572	3038376	3038578	3037511	3040572			3061	chr4:3037511-3040572	chr4:3038376-3038578	202	1	source	annotated	FALSE
GRK4	ENSG00000125388.20	ENSG00000125388.20:s:3037374-3037511	-0.0277202402605635	0.134125480187627	0.000186437462372679	0.325	0.256	s|1e1.1o1|1e2.1o1|i	FALSE	FALSE	TRUE	3	3	0	chr4	+	ENSG00000125388.20:s:3037374-3037511_3037512-3038375	3040572	3040760	3037512	3038375			863	chr4:3037512-3038375	chr4:3040572-3040760	188	2	source	none	FALSE
GRK4	ENSG00000125388.20	ENSG00000125388.20:t:2992215-2992292	-0.108389790680732	0.509548870120073	5.22677432623908e-06	0.558	0.396	t|1e1.1o1|1e2.1o1	FALSE	FALSE	TRUE	2	3	0	chr4	+	ENSG00000125388.20:t:2992215-2992292_2964122-2992215	2963571	2964122	2964122	2992215			28093	chr4:2964122-2992215	chr4:2963571-2964122	551	2	target	novel_exon_skip	FALSE
GRK4	ENSG00000125388.20	ENSG00000125388.20:t:2992215-2992292	0.108389789013785	0.50954867469467	5.22652311696955e-06	0.442	0.604	t|1e1.1o1|1e2.1o1	FALSE	FALSE	TRUE	2	3	1	chr4	+	ENSG00000125388.20:t:2992215-2992292_2988839-2992215	2988727	2988839	2988839	2992215			3376	chr4:2988839-2992215	chr4:2988727-2988839	112	1	target	annotated	FALSE
PRMT7	ENSG00000132600.16	ENSG00000132600.16:s:68310974-68311111	-0.127791947808373	0.656323377045293	2.79772488331886e-06	0.555	0.4	s|1e1.1o1|1e2.4o6|2e3.1o1|2e4.4o6	TRUE	FALSE	TRUE	4	5	1	chr16	+	ENSG00000132600.16:s:68310974-68311111_68311099-68312042	68310974	68311111	68311099	68312042			943	chr16:68311099-68312042	chr16:68310974-68311111	137	2	source	annotated	FALSE
PRMT7	ENSG00000132600.16	ENSG00000132600.16:s:68310974-68311111	0.162370522773853	0.846558645300485	1.0467883916624e-06	0.223	0.405	s|1e1.1o1|1e2.4o6|2e3.1o1|2e4.4o6	TRUE	FALSE	TRUE	4	5	1	chr16	+	ENSG00000132600.16:s:68310974-68311111_68311099-68315897	68312042	68312176	68311099	68315897			4798	chr16:68311099-68315897	chr16:68312042-68312176	134	2	source	annotated	FALSE
PRMT7	ENSG00000132600.16	ENSG00000132600.16:s:68310974-68311111	0.0107417819788443	0.0138854515117243	8.69017520364751e-05	0.118	0.138	s|1e1.1o1|1e2.4o6|2e3.1o1|2e4.4o6	TRUE	FALSE	TRUE	4	5	1	chr16	+	ENSG00000132600.16:s:68310974-68311111_68311111-68312042	68315842	68315957	68311111	68312042			931	chr16:68311111-68312042	chr16:68315842-68315957	115	1	source	annotated	FALSE
PRMT7	ENSG00000132600.16	ENSG00000132600.16:s:68310974-68311111	-0.0278021270856902	0.0418335696356474	4.01465858357319e-05	0.105	0.058	s|1e1.1o1|1e2.4o6|2e3.1o1|2e4.4o6	TRUE	FALSE	TRUE	4	5	1	chr16	+	ENSG00000132600.16:s:68310974-68311111_68311111-68315897			68311111	68315897			4786	chr16:68311111-68315897	chr16:NA-NA			source	annotated	FALSE
PRMT7	ENSG00000132600.16	ENSG00000132600.16:t:68315842-68315957	0.169056059129623	0.864575190512313	9.5907059220646e-07	0.209	0.392	t|1e1.1o2|1e1.2o2|1e2.1o1	TRUE	FALSE	TRUE	3	3	1	chr16	+	ENSG00000132600.16:t:68315842-68315957_68311099-68315897	68310974	68311111	68311099	68315897			4798	chr16:68311099-68315897	chr16:68310974-68311111	137	2	target	annotated	FALSE
PRMT7	ENSG00000132600.16	ENSG00000132600.16:t:68315842-68315957	-0.0228836370751558	0.0290745979367915	4.97776908533476e-05	0.098	0.057	t|1e1.1o2|1e1.2o2|1e2.1o1	TRUE	FALSE	TRUE	3	3	1	chr16	+	ENSG00000132600.16:t:68315842-68315957_68311111-68315897	68312042	68312176	68311111	68315897			4786	chr16:68311111-68315897	chr16:68312042-68312176	134	2	target	annotated	FALSE
PRMT7	ENSG00000132600.16	ENSG00000132600.16:t:68315842-68315957	-0.118425907889971	0.603426191084027	3.32996391372298e-06	0.696	0.551	t|1e1.1o2|1e1.2o2|1e2.1o1	TRUE	FALSE	TRUE	3	3	1	chr16	+	ENSG00000132600.16:t:68315842-68315957_68312176-68315897	68315842	68315957	68312176	68315897			3721	chr16:68312176-68315897	chr16:68315842-68315957	115	1	target	annotated	FALSE
CTIF	ENSG00000134030.14	ENSG00000134030.14:s:48539031-48539312	-0.13795547593975	0.788055914040955	1.0368729516097e-06	0.231	0.086	s|1e1.2o2|1e2.1o1	FALSE	FALSE	TRUE	2	3	1	chr18	+	ENSG00000134030.14:s:48539031-48539312_48539312-48539758	48539031	48539312	48539312	48539758			446	chr18:48539312-48539758	chr18:48539031-48539312	281	2	source	annotated	FALSE
CTIF	ENSG00000134030.14	ENSG00000134030.14:s:48539031-48539312	0.137955447034047	0.78805561061752	1.0368185792156e-06	0.769	0.914	s|1e1.2o2|1e2.1o1	FALSE	FALSE	TRUE	2	3	1	chr18	+	ENSG00000134030.14:s:48539031-48539312_48539312-48619538	48539415	48539831	48539312	48619538			80226	chr18:48539312-48619538	chr18:48539415-48539831	416	2	source	annotated	FALSE
TPP2	ENSG00000134900.12	ENSG00000134900.12:t:102656942-102657207	-0.112191969632186	0.608932988700622	2.08192104400595e-06	0.962	0.845	t|1e1.1o1|1e2.1o1	FALSE	FALSE	TRUE	2	3	1	chr13	+	ENSG00000134900.12:t:102656942-102657207_102649486-102657056	102649408	102649486	102649486	102657056			7570	chr13:102649486-102657056	chr13:102649408-102649486	78	0	target	annotated	FALSE
TPP2	ENSG00000134900.12	ENSG00000134900.12:t:102656942-102657207	0.112191898761831	0.608932289260694	2.08180353667008e-06	0.038	0.155	t|1e1.1o1|1e2.1o1	FALSE	FALSE	TRUE	2	3	1	chr13	+	ENSG00000134900.12:t:102656942-102657207_102651397-102657056	102651339	102651397	102651397	102657056			5659	chr13:102651397-102657056	chr13:102651339-102651397	58	1	target	annotated	FALSE
KHDC1	ENSG00000135314.12	ENSG00000135314.12:s:73291998-73292040	-0.138796056659668	0.619160150864725	4.27845056172327e-06	0.696	0.49	s|1e1.1o1|1e2.2o2	FALSE	FALSE	TRUE	2	3	1	chr6	-	ENSG00000135314.12:s:73291998-73292040_73275556-73291998	73242406	73242561	73275556	73291998			16442	chr6:73275556-73291998	chr6:73242406-73242561	155	2	source	annotated	FALSE
KHDC1	ENSG00000135314.12	ENSG00000135314.12:s:73291998-73292040	0.138796032097153	0.619159948720144	4.27825566339489e-06	0.304	0.51	s|1e1.1o1|1e2.2o2	FALSE	FALSE	TRUE	2	3	1	chr6	-	ENSG00000135314.12:s:73291998-73292040_73242530-73291998	73275414	73275556	73242530	73291998			49468	chr6:73242530-73291998	chr6:73275414-73275556	142	1	source	annotated	FALSE
THUMPD2	ENSG00000138050.15	ENSG00000138050.15:s:39761331-39761418	0.133958515985831	0.657090652564501	3.16315972970086e-06	0.541	0.711	s|1e1.1o1|1e2.1o1	FALSE	FALSE	TRUE	2	3	1	chr2	-	ENSG00000138050.15:s:39761331-39761418_39757368-39761331	39755889	39755960	39757368	39761331			3963	chr2:39757368-39761331	chr2:39755889-39755960	71	2	source	annotated	FALSE
THUMPD2	ENSG00000138050.15	ENSG00000138050.15:s:39761331-39761418	-0.133958492893622	0.657090744859613	3.16332138139419e-06	0.459	0.289	s|1e1.1o1|1e2.1o1	FALSE	FALSE	TRUE	2	3	1	chr2	-	ENSG00000138050.15:s:39761331-39761418_39755960-39761331	39757248	39757368	39755960	39761331			5371	chr2:39755960-39761331	chr2:39757248-39757368	120	0	source	annotated	FALSE
INTS14	ENSG00000138614.15	ENSG00000138614.15:s:65610686-65611289	0.133552439531992	0.694156542824159	2.33299125941552e-05	0.341	0.503	s|1e1.1o3|1e1.2o3|1e2.1o2|2e3.1o3|2e3.2o3|2e4.1o2|3e5.1o3|3e5.2o3|3e6.1o2|i	TRUE	TRUE	TRUE	10	7	1	chr15	-	ENSG00000138614.15:s:65610686-65611289_65607442-65611098	65605129	65605236	65607442	65611098	65607443	65610685	3656	chr15:65607442-65611098	chr15:65605129-65605236	107	2	source	annotated	FALSE
INTS14	ENSG00000138614.15	ENSG00000138614.15:s:65610686-65611289	-0.0010113021571694	0.00223159945092964	0.00343343023892873	0.07	0.069	s|1e1.1o3|1e1.2o3|1e2.1o2|2e3.1o3|2e3.2o3|2e4.1o2|3e5.1o3|3e5.2o3|3e6.1o2|i	TRUE	TRUE	TRUE	10	7	1	chr15	-	ENSG00000138614.15:s:65610686-65611289_65607425-65611098	65607159	65607442	65607425	65611098			3673	chr15:65607425-65611098	chr15:65607159-65607442	283	1	source	annotated	FALSE
INTS14	ENSG00000138614.15	ENSG00000138614.15:s:65610686-65611289	0.000220930238776776	8.14678747129712e-07	0.175154893179688	0.005	0.019	s|1e1.1o3|1e1.2o3|1e2.1o2|2e3.1o3|2e3.2o3|2e4.1o2|3e5.1o3|3e5.2o3|3e6.1o2|i	TRUE	TRUE	TRUE	10	7	1	chr15	-	ENSG00000138614.15:s:65610686-65611289_65605236-65611098	65610686	65611289	65605236	65611098			5862	chr15:65605236-65611098	chr15:65610686-65611289	603	0	source	annotated	FALSE
INTS14	ENSG00000138614.15	ENSG00000138614.15:s:65610686-65611289	-0.0300757850083493	0.067783370231053	0.000352985121039762	0.183	0.131	s|1e1.1o3|1e1.2o3|1e2.1o2|2e3.1o3|2e3.2o3|2e4.1o2|3e5.1o3|3e5.2o3|3e6.1o2|i	TRUE	TRUE	TRUE	10	7	1	chr15	-	ENSG00000138614.15:s:65610686-65611289_65607442-65610796			65607442	65610796			3354	chr15:65607442-65610796	chr15:NA-NA			source	annotated	FALSE
INTS14	ENSG00000138614.15	ENSG00000138614.15:s:65610686-65611289	-0.0112973721225257	0.00814086438128807	0.00148541938976621	0.08	0.056	s|1e1.1o3|1e1.2o3|1e2.1o2|2e3.1o3|2e3.2o3|2e4.1o2|3e5.1o3|3e5.2o3|3e6.1o2|i	TRUE	TRUE	TRUE	10	7	1	chr15	-	ENSG00000138614.15:s:65610686-65611289_65607425-65610796			65607425	65610796			3371	chr15:65607425-65610796	chr15:NA-NA			source	annotated	FALSE
INTS14	ENSG00000138614.15	ENSG00000138614.15:s:65610686-65611289	-0.0298260010241874	0.00662862729956602	0.00435491183346159	0.065	0.001	s|1e1.1o3|1e1.2o3|1e2.1o2|2e3.1o3|2e3.2o3|2e4.1o2|3e5.1o3|3e5.2o3|3e6.1o2|i	TRUE	TRUE	TRUE	10	7	1	chr15	-	ENSG00000138614.15:s:65610686-65611289_65605236-65610796			65605236	65610796			5560	chr15:65605236-65610796	chr15:NA-NA			source	annotated	FALSE
INTS14	ENSG00000138614.15	ENSG00000138614.15:s:65610686-65611289	0.0120744130058117	0.0182703174344281	0.000866107570891749	0.128	0.155	s|1e1.1o3|1e1.2o3|1e2.1o2|2e3.1o3|2e3.2o3|2e4.1o2|3e5.1o3|3e5.2o3|3e6.1o2|i	TRUE	TRUE	TRUE	10	7	1	chr15	-	ENSG00000138614.15:s:65610686-65611289_65607442-65610686			65607442	65610686			3244	chr15:65607442-65610686	chr15:NA-NA			source	annotated	FALSE
INTS14	ENSG00000138614.15	ENSG00000138614.15:s:65610686-65611289	-0.00719103424367003	0.00016578171147975	0.040642238313097	0.045	0.013	s|1e1.1o3|1e1.2o3|1e2.1o2|2e3.1o3|2e3.2o3|2e4.1o2|3e5.1o3|3e5.2o3|3e6.1o2|i	TRUE	TRUE	TRUE	10	7	1	chr15	-	ENSG00000138614.15:s:65610686-65611289_65607425-65610686			65607425	65610686			3261	chr15:65607425-65610686	chr15:NA-NA			source	annotated	FALSE
INTS14	ENSG00000138614.15	ENSG00000138614.15:s:65610686-65611289	0.0013259266120738	0.000106823850917535	0.0478255675594383	0.035	0.038	s|1e1.1o3|1e1.2o3|1e2.1o2|2e3.1o3|2e3.2o3|2e4.1o2|3e5.1o3|3e5.2o3|3e6.1o2|i	TRUE	TRUE	TRUE	10	7	1	chr15	-	ENSG00000138614.15:s:65610686-65611289_65605236-65610686			65605236	65610686			5450	chr15:65605236-65610686	chr15:NA-NA			source	annotated	FALSE
INTS14	ENSG00000138614.15	ENSG00000138614.15:s:65610686-65611289	-0.00930439916361063	0.00120195602383417	0.00785119507419019	0.042	0.017	s|1e1.1o3|1e1.2o3|1e2.1o2|2e3.1o3|2e3.2o3|2e4.1o2|3e5.1o3|3e5.2o3|3e6.1o2|i	TRUE	TRUE	TRUE	10	7	0	chr15	-	ENSG00000138614.15:s:65610686-65611289_65607443-65610685			65607443	65610685			3242	chr15:65607443-65610685	chr15:NA-NA			source	none	FALSE
MDGA2	ENSG00000139915.20	ENSG00000139915.20:s:47061249-47061578	-0.120141397475443	0.632899390875116	2.3902160670719e-06	0.982	0.837	s|1e1.1o2|1e1.2o2	FALSE	TRUE	FALSE	2	2	1	chr14	-	ENSG00000139915.20:s:47061249-47061578_47035304-47061249	47035011	47035304	47035304	47061249			25945	chr14:47035304-47061249	chr14:47035011-47035304	293	2	source	annotated	FALSE
MDGA2	ENSG00000139915.20	ENSG00000139915.20:s:47061249-47061578	0.120141339578109	0.632898684583812	2.39008591745741e-06	0.018	0.163	s|1e1.1o2|1e1.2o2	FALSE	TRUE	FALSE	2	2	1	chr14	-	ENSG00000139915.20:s:47061249-47061578_47035278-47061249	47061249	47061578	47035278	47061249			25971	chr14:47035278-47061249	chr14:47061249-47061578	329	2	source	annotated	FALSE
PRPSAP2	ENSG00000141127.15	ENSG00000141127.15:t:18865802-18865952	0.0192504507156497	0.00717491135712588	0.000209223521091855	0.048	0.075	t|1e1.2o3|1e1.3o3|1e2.1o1|1e3.1o1	TRUE	FALSE	TRUE	4	4	0	chr17	+	ENSG00000141127.15:t:18865802-18865952_18856429-18865802	18856299	18856476	18856429	18865802			9373	chr17:18856429-18865802	chr17:18856299-18856476	177	0	target	novel_exon_skip	FALSE
PRPSAP2	ENSG00000141127.15	ENSG00000141127.15:t:18865802-18865952	2.09515539022914e-05	5.79757686311709e-10	0.41372823709722	0.01	0.016	t|1e1.2o3|1e1.3o3|1e2.1o1|1e3.1o1	TRUE	FALSE	TRUE	4	4	1	chr17	+	ENSG00000141127.15:t:18865802-18865952_18856476-18865802	18858068	18858261	18856476	18865802			9326	chr17:18856476-18865802	chr17:18858068-18858261	193	1	target	annotated	FALSE
PRPSAP2	ENSG00000141127.15	ENSG00000141127.15:t:18865802-18865952	0.0736940791330879	0.281208941462769	7.5561908952021e-06	0.082	0.169	t|1e1.2o3|1e1.3o3|1e2.1o1|1e3.1o1	TRUE	FALSE	TRUE	4	4	1	chr17	+	ENSG00000141127.15:t:18865802-18865952_18858261-18865802	18865469	18865564	18858261	18865802			7541	chr17:18858261-18865802	chr17:18865469-18865564	95	2	target	annotated	FALSE
PRPSAP2	ENSG00000141127.15	ENSG00000141127.15:t:18865802-18865952	-0.105464635959237	0.541156596845834	3.38543508549005e-06	0.86	0.74	t|1e1.2o3|1e1.3o3|1e2.1o1|1e3.1o1	TRUE	FALSE	TRUE	4	4	1	chr17	+	ENSG00000141127.15:t:18865802-18865952_18865564-18865802	18865802	18865952	18865564	18865802			238	chr17:18865564-18865802	chr17:18865802-18865952	150	0	target	annotated	FALSE
ZNF687	ENSG00000143373.18	ENSG00000143373.18:t:151286275-151286705	0.0220672746678331	0.0595022180404118	3.1791192734193e-05	0.103	0.146	t|1e1.1o1|1e2.1o1|1e3.1o1	FALSE	FALSE	TRUE	3	4	1	chr1	+	ENSG00000143373.18:t:151286275-151286705_151282079-151286275	151281618	151282079	151282079	151286275			4196	chr1:151282079-151286275	chr1:151281618-151282079	461	2	target	annotated	FALSE
ZNF687	ENSG00000143373.18	ENSG00000143373.18:t:151286275-151286705	-0.167710535744755	0.776344726923384	2.25264669073688e-06	0.783	0.573	t|1e1.1o1|1e2.1o1|1e3.1o1	FALSE	FALSE	TRUE	3	4	1	chr1	+	ENSG00000143373.18:t:151286275-151286705_151282395-151286275	151282288	151282395	151282395	151286275			3880	chr1:151282395-151286275	chr1:151282288-151282395	107	2	target	annotated	FALSE
ZNF687	ENSG00000143373.18	ENSG00000143373.18:t:151286275-151286705	0.128647636193498	0.640411065379058	3.18313160723301e-06	0.113	0.279	t|1e1.1o1|1e2.1o1|1e3.1o1	FALSE	FALSE	TRUE	3	4	1	chr1	+	ENSG00000143373.18:t:151286275-151286705_151286074-151286275	151285206	151286074	151286074	151286275			201	chr1:151286074-151286275	chr1:151285206-151286074	868	1	target	annotated	FALSE
RABL2A	ENSG00000144134.18	ENSG00000144134.18:s:113635028-113635513	-0.0235090792939083	0.00368188092644407	0.00631147263566978	0.061	0.02	s|1e1.1o2|1e2.3o3|1e3.1o2|i	FALSE	FALSE	TRUE	4	4	1	chr2	+	ENSG00000144134.18:s:113635028-113635513_113635130-113637299	113635028	113635513	113635130	113637299	113635514	113637298	2169	chr2:113635130-113637299	chr2:113635028-113635513	485	2	source	annotated	FALSE
RABL2A	ENSG00000144134.18	ENSG00000144134.18:s:113635028-113635513	0.157948959833202	0.81703499984032	1.21036464407506e-05	0.553	0.734	s|1e1.1o2|1e2.3o3|1e3.1o2|i	FALSE	FALSE	TRUE	4	4	1	chr2	+	ENSG00000144134.18:s:113635028-113635513_113635130-113640894	113637299	113637747	113635130	113640894			5764	chr2:113635130-113640894	chr2:113637299-113637747	448	1	source	annotated	FALSE
RABL2A	ENSG00000144134.18	ENSG00000144134.18:s:113635028-113635513	-0.0925448425883289	0.449864965382958	5.44773453999836e-05	0.204	0.092	s|1e1.1o2|1e2.3o3|1e3.1o2|i	FALSE	FALSE	TRUE	4	4	1	chr2	+	ENSG00000144134.18:s:113635028-113635513_113635130-113641353	113640020	113641005	113635130	113641353			6223	chr2:113635130-113641353	chr2:113640020-113641005	985	1	source	annotated	FALSE
RABL2A	ENSG00000144134.18	ENSG00000144134.18:s:113635028-113635513	-0.0123530756560779	0.0229536292505316	0.000716683651009742	0.182	0.155	s|1e1.1o2|1e2.3o3|1e3.1o2|i	FALSE	FALSE	TRUE	4	4	0	chr2	+	ENSG00000144134.18:s:113635028-113635513_113635514-113637298	113641353	113641480	113635514	113637298			1784	chr2:113635514-113637298	chr2:113641353-113641480	127	1	source	none	FALSE
G3BP1	ENSG00000145907.15	ENSG00000145907.15:s:151786572-151787386	0.370902637965745	1	1.00385942860109e-21	0.022	0.39	s|1e1.1o1|1e2.1o1|1e3.1o1	FALSE	FALSE	TRUE	3	4	1	chr5	+	ENSG00000145907.15:s:151786572-151787386_151786715-151787765	151786572	151787386	151786715	151787765			1050	chr5:151786715-151787765	chr5:151786572-151787386	814	1	source	annotated	FALSE
G3BP1	ENSG00000145907.15	ENSG00000145907.15:s:151786572-151787386	-0.328514087362361	0.99999999999995	0	0.943	0.609	s|1e1.1o1|1e2.1o1|1e3.1o1	FALSE	FALSE	TRUE	3	4	1	chr5	+	ENSG00000145907.15:s:151786572-151787386_151786715-151790323	151787765	151787794	151786715	151790323			3608	chr5:151786715-151790323	chr5:151787765-151787794	29	2	source	annotated	FALSE
G3BP1	ENSG00000145907.15	ENSG00000145907.15:s:151786572-151787386	-0.000500723862876482	8.67639718827781e-21	0.475344009336113	0.035	0.001	s|1e1.1o1|1e2.1o1|1e3.1o1	FALSE	FALSE	TRUE	3	4	1	chr5	+	ENSG00000145907.15:s:151786572-151787386_151786715-151790889	151790323	151790404	151786715	151790889			4174	chr5:151786715-151790889	chr5:151790323-151790404	81	0	source	annotated	FALSE
G3BP1	ENSG00000145907.15	ENSG00000145907.15:t:151790323-151790404	-0.171167326853424	0.985829699402354	8.36641311785513e-10	0.992	0.802	t|1e1.1o2|1e2.1o1|i	FALSE	FALSE	TRUE	3	3	1	chr5	+	ENSG00000145907.15:t:151790323-151790404_151786715-151790323	151786572	151787386	151786715	151790323	151787795	151790322	3608	chr5:151786715-151790323	chr5:151786572-151787386	814	1	target	annotated	FALSE
G3BP1	ENSG00000145907.15	ENSG00000145907.15:t:151790323-151790404	0.156047162061482	0.950158259284315	1.55975667506195e-08	0.007	0.182	t|1e1.1o2|1e2.1o1|i	FALSE	FALSE	TRUE	3	3	1	chr5	+	ENSG00000145907.15:t:151790323-151790404_151787794-151790323	151787765	151787794	151787794	151790323			2529	chr5:151787794-151790323	chr5:151787765-151787794	29	2	target	annotated	FALSE
G3BP1	ENSG00000145907.15	ENSG00000145907.15:t:151790323-151790404	7.4686384051213e-06	7.30152000985327e-21	0.475105476459739	0	0.015	t|1e1.1o2|1e2.1o1|i	FALSE	FALSE	TRUE	3	3	0	chr5	+	ENSG00000145907.15:t:151790323-151790404_151787795-151790322	151790323	151790404	151787795	151790322			2527	chr5:151787795-151790322	chr5:151790323-151790404	81	0	target	none	FALSE
ZNF7	ENSG00000147789.15	ENSG00000147789.15:s:144827464-144827609	-0.086870420540988	0.401165206294225	6.93791788719533e-06	0.831	0.685	s|1e1.2o2|1e2.2o3|1e2.3o3	FALSE	TRUE	TRUE	3	3	1	chr8	+	ENSG00000147789.15:s:144827464-144827609_144827609-144829043	144827464	144827609	144827609	144829043			1434	chr8:144827609-144829043	chr8:144827464-144827609	145	1	source	annotated	FALSE
ZNF7	ENSG00000147789.15	ENSG00000147789.15:s:144827464-144827609	0.105599522558739	0.499880562787587	5.17183373468545e-06	0.116	0.273	s|1e1.2o2|1e2.2o3|1e2.3o3	FALSE	TRUE	TRUE	3	3	0	chr8	+	ENSG00000147789.15:s:144827464-144827609_144827609-144837391	144829042	144829090	144827609	144837391			9782	chr8:144827609-144837391	chr8:144829042-144829090	48	0	source	novel_exon_skip	FALSE
ZNF7	ENSG00000147789.15	ENSG00000147789.15:s:144827464-144827609	-0.00619437018506597	0.00807820184606793	0.00015452094941093	0.053	0.042	s|1e1.2o2|1e2.2o3|1e2.3o3	FALSE	TRUE	TRUE	3	3	1	chr8	+	ENSG00000147789.15:s:144827464-144827609_144827609-144837394	144833733	144837507	144827609	144837394			9785	chr8:144827609-144837394	chr8:144833733-144837507	3774	0	source	annotated	FALSE
LRRC4C	ENSG00000148948.8	ENSG00000148948.8:s:40241519-40241883	0.21602417428123	0.881514284195488	1.56595739659606e-06	0.432	0.69	s|1e1.1o1|1e2.1o1	FALSE	FALSE	TRUE	2	3	1	chr11	-	ENSG00000148948.8:s:40241519-40241883_40140853-40241519	40114203	40116334	40140853	40241519			100666	chr11:40140853-40241519	chr11:40114203-40116334	2131	1	source	annotated	FALSE
LRRC4C	ENSG00000148948.8	ENSG00000148948.8:s:40241519-40241883	-0.216024204654799	0.881514400650299	1.56602835954534e-06	0.568	0.31	s|1e1.1o1|1e2.1o1	FALSE	FALSE	TRUE	2	3	0	chr11	-	ENSG00000148948.8:s:40241519-40241883_40116334-40241519	40140801	40140853	40116334	40241519			125185	chr11:40116334-40241519	chr11:40140801-40140853	52	1	source	novel_exon_skip	FALSE
LRRC4C	ENSG00000148948.8	ENSG00000148948.8:t:40114203-40116334	-0.017529794230524	0.0201598830772869	8.05152478410287e-05	0.269	0.24	t|1e1.1o1|1e2.1o1|1e3.1o1|1e4.1o1	FALSE	FALSE	TRUE	4	5	1	chr11	-	ENSG00000148948.8:t:40114203-40116334_40116334-40292193	40114203	40116334	40116334	40292193			175859	chr11:40116334-40292193	chr11:40114203-40116334	2131	1	target	annotated	FALSE
LRRC4C	ENSG00000148948.8	ENSG00000148948.8:t:40114203-40116334	-0.0472316059967124	0.0398549001813944	8.1197369950603e-05	0.129	0.071	t|1e1.1o1|1e2.1o1|1e3.1o1|1e4.1o1	FALSE	FALSE	TRUE	4	5	0	chr11	-	ENSG00000148948.8:t:40114203-40116334_40116334-40241519	40140486	40140551	40116334	40241519			125185	chr11:40116334-40241519	chr11:40140486-40140551	65	2	target	novel_exon_skip	FALSE
LRRC4C	ENSG00000148948.8	ENSG00000148948.8:t:40114203-40116334	0.140935939086899	0.770438054634484	1.32693683449878e-06	0.494	0.649	t|1e1.1o1|1e2.1o1|1e3.1o1|1e4.1o1	FALSE	FALSE	TRUE	4	5	1	chr11	-	ENSG00000148948.8:t:40114203-40116334_40116334-40140801	40140801	40140853	40116334	40140801			24467	chr11:40116334-40140801	chr11:40140801-40140853	52	1	target	annotated	FALSE
LRRC4C	ENSG00000148948.8	ENSG00000148948.8:t:40114203-40116334	-0.0564446300869947	0.162510034845652	1.2453761549569e-05	0.107	0.04	t|1e1.1o1|1e2.1o1|1e3.1o1|1e4.1o1	FALSE	FALSE	TRUE	4	5	0	chr11	-	ENSG00000148948.8:t:40114203-40116334_40116334-40140486	40241519	40241883	40116334	40140486			24152	chr11:40116334-40140486	chr11:40241519-40241883	364	1	target	novel_donor	FALSE
WDR17	ENSG00000150627.15	ENSG00000150627.15:s:176111575-176111703	0.258273316604894	0.967702688947443	5.40133075298519e-07	0.535	0.821	s|1e1.1o1|1e2.1o1	FALSE	FALSE	TRUE	2	3	1	chr4	+	ENSG00000150627.15:s:176111575-176111703_176111703-176115796	176111575	176111703	176111703	176115796			4093	chr4:176111703-176115796	chr4:176111575-176111703	128	2	source	annotated	FALSE
WDR17	ENSG00000150627.15	ENSG00000150627.15:s:176111575-176111703	-0.25827332969924	0.967702682412662	5.40156638972889e-07	0.465	0.179	s|1e1.1o1|1e2.1o1	FALSE	FALSE	TRUE	2	3	1	chr4	+	ENSG00000150627.15:s:176111575-176111703_176111703-176119867	176115796	176115979	176111703	176119867			8164	chr4:176111703-176119867	chr4:176115796-176115979	183	0	source	annotated	FALSE
WDR17	ENSG00000150627.15	ENSG00000150627.15:t:176119867-176120097	-0.135826293835698	0.654346155140354	3.32454726870157e-06	0.383	0.197	t|1e1.1o1|1e2.1o1	FALSE	FALSE	TRUE	2	3	1	chr4	+	ENSG00000150627.15:t:176119867-176120097_176111703-176119867	176111575	176111703	176111703	176119867			8164	chr4:176111703-176119867	chr4:176111575-176111703	128	2	target	annotated	FALSE
WDR17	ENSG00000150627.15	ENSG00000150627.15:t:176119867-176120097	0.135826304302229	0.654346033528254	3.32438224017741e-06	0.617	0.803	t|1e1.1o1|1e2.1o1	FALSE	FALSE	TRUE	2	3	1	chr4	+	ENSG00000150627.15:t:176119867-176120097_176115979-176119867	176115796	176115979	176115979	176119867			3888	chr4:176115979-176119867	chr4:176115796-176115979	183	0	target	annotated	FALSE
POC5	ENSG00000152359.14	ENSG00000152359.14:s:75712854-75712951	0.0546200016724528	0.151257620122272	1.62399441314787e-05	0.035	0.109	s|1e1.1o1|1e2.1o1|1e3.1o1	FALSE	FALSE	TRUE	3	4	1	chr5	-	ENSG00000152359.14:s:75712854-75712951_75712665-75712854	75705239	75705787	75712665	75712854			189	chr5:75712665-75712854	chr5:75705239-75705787	548	2	source	annotated	FALSE
POC5	ENSG00000152359.14	ENSG00000152359.14:s:75712854-75712951	-0.101725568042783	0.501742696298225	4.45150974437425e-06	0.903	0.775	s|1e1.1o1|1e2.1o1|1e3.1o1	FALSE	FALSE	TRUE	3	4	1	chr5	-	ENSG00000152359.14:s:75712854-75712951_75707875-75712854	75707484	75707875	75707875	75712854			4979	chr5:75707875-75712854	chr5:75707484-75707875	391	1	source	annotated	FALSE
POC5	ENSG00000152359.14	ENSG00000152359.14:s:75712854-75712951	0.0320453792086045	0.063844469684185	3.0977539866036e-05	0.062	0.117	s|1e1.1o1|1e2.1o1|1e3.1o1	FALSE	FALSE	TRUE	3	4	1	chr5	-	ENSG00000152359.14:s:75712854-75712951_75705787-75712854	75712607	75712665	75705787	75712854			7067	chr5:75705787-75712854	chr5:75712607-75712665	58	1	source	annotated	FALSE
POC5	ENSG00000152359.14	ENSG00000152359.14:t:75705239-75705787	0.122740888644762	0.594981668312436	3.85554670324776e-06	0.096	0.263	t|1e1.1o1|1e2.1o2	FALSE	FALSE	TRUE	2	3	1	chr5	-	ENSG00000152359.14:t:75705239-75705787_75705787-75712854	75705239	75705787	75705787	75712854			7067	chr5:75705787-75712854	chr5:75705239-75705787	548	2	target	annotated	FALSE
POC5	ENSG00000152359.14	ENSG00000152359.14:t:75705239-75705787	-0.122740894181202	0.594981904965206	3.8557501752523e-06	0.904	0.737	t|1e1.1o1|1e2.1o2	FALSE	FALSE	TRUE	2	3	1	chr5	-	ENSG00000152359.14:t:75705239-75705787_75705787-75707737	75707484	75707875	75705787	75707737			1950	chr5:75705787-75707737	chr5:75707484-75707875	391	1	target	annotated	FALSE
DRAM2	ENSG00000156171.14	ENSG00000156171.14:s:111140038-111140040	-0.159049582852145	0.822198027488808	1.29399506043626e-06	0.379	0.204	s|1e1.1o2|1e1.2o2	FALSE	TRUE	FALSE	2	2	1	chr1	-	ENSG00000156171.14:s:111140038-111140040_111139711-111140038	111139588	111139711	111139711	111140038			327	chr1:111139711-111140038	chr1:111139588-111139711	123	0	source	annotated	FALSE
DRAM2	ENSG00000156171.14	ENSG00000156171.14:s:111140038-111140040	0.159049599958203	0.822197994300862	1.29392958537164e-06	0.621	0.796	s|1e1.1o2|1e1.2o2	FALSE	TRUE	FALSE	2	2	1	chr1	-	ENSG00000156171.14:s:111140038-111140040_111139666-111140038	111140038	111140040	111139666	111140038			372	chr1:111139666-111140038	chr1:111140038-111140040	2	2	source	annotated	FALSE
DRAM2	ENSG00000156171.14	ENSG00000156171.14:t:111124742-111124881	-0.236387190277294	0.893568204515406	1.18929010731739e-05	0.651	0.362	t|1e1.1o1|i	FALSE	FALSE	FALSE	2	2	1	chr1	-	ENSG00000156171.14:t:111124742-111124881_111124881-111126227	111124742	111124881	111124881	111126227	111124882	111125377	1346	chr1:111124881-111126227	chr1:111124742-111124881	139	1	target	annotated	FALSE
DRAM2	ENSG00000156171.14	ENSG00000156171.14:t:111124742-111124881	0.236387181338318	0.893568123567705	1.18920315651922e-05	0.349	0.638	t|1e1.1o1|i	FALSE	FALSE	FALSE	2	2	0	chr1	-	ENSG00000156171.14:t:111124742-111124881_111124882-111125377	111126227	111126294	111124882	111125377			495	chr1:111124882-111125377	chr1:111126227-111126294	67	1	target	none	FALSE
SHANK1	ENSG00000161681.15	ENSG00000161681.15:s:50697589-50697664	0.365692246800776	0.999999419610494	2.78325886963086e-12	0.1	0.461	s|1e1.1o1|1e2.2o2	FALSE	FALSE	TRUE	2	3	1	chr19	-	ENSG00000161681.15:s:50697589-50697664_50697122-50697589	50689197	50689404	50697122	50697589			467	chr19:50697122-50697589	chr19:50689197-50689404	207	0	source	annotated	FALSE
SHANK1	ENSG00000161681.15	ENSG00000161681.15:s:50697589-50697664	-0.365692278488385	0.999999423525967	2.47601938951902e-12	0.9	0.539	s|1e1.1o1|1e2.2o2	FALSE	FALSE	TRUE	2	3	1	chr19	-	ENSG00000161681.15:s:50697589-50697664_50689279-50697589	50697096	50697122	50689279	50697589			8310	chr19:50689279-50697589	chr19:50697096-50697122	26	2	source	annotated	FALSE
SHANK1	ENSG00000161681.15	ENSG00000161681.15:t:50689197-50689404	-0.385647134405804	0.999999998788957	1.99840144432528e-15	0.624	0.244	t|1e1.1o1|1e2.1o1|1e3.1o1	FALSE	FALSE	TRUE	3	4	1	chr19	-	ENSG00000161681.15:t:50689197-50689404_50689279-50697589	50689197	50689404	50689279	50697589			8310	chr19:50689279-50697589	chr19:50689197-50689404	207	0	target	annotated	FALSE
SHANK1	ENSG00000161681.15	ENSG00000161681.15:t:50689197-50689404	0.307246941937512	0.999999737893354	2.40517925734761e-14	0.1	0.405	t|1e1.1o1|1e2.1o1|1e3.1o1	FALSE	FALSE	TRUE	3	4	1	chr19	-	ENSG00000161681.15:t:50689197-50689404_50689279-50697096	50694903		50689279	50697096			7817	chr19:50689279-50697096	chr19:50694903-nan			target	annotated	FALSE
SHANK1	ENSG00000161681.15	ENSG00000161681.15:t:50689197-50689404	0.052285083503063	0.160014535687654	1.52800264246373e-05	0.276	0.349	t|1e1.1o1|1e2.1o1|1e3.1o1	FALSE	FALSE	TRUE	3	4	0	chr19	-	ENSG00000161681.15:t:50689197-50689404_50689279-50694903	50697096	50697122	50689279	50694903			5624	chr19:50689279-50694903	chr19:50697096-50697122	26	2	target	novel_donor	FALSE
DCAF16	ENSG00000163257.11	ENSG00000163257.11:t:17805107-17805225	-0.107358044135346	0.512658465499112	4.93663615630524e-06	0.818	0.66	t|1e1.1o1|1e2.1o2	FALSE	FALSE	TRUE	2	3	1	chr4	-	ENSG00000163257.11:t:17805107-17805225_17805225-17810447	17805107	17805225	17805225	17810447			5222	chr4:17805225-17810447	chr4:17805107-17805225	118	1	target	annotated	FALSE
DCAF16	ENSG00000163257.11	ENSG00000163257.11:t:17805107-17805225	0.107358034292872	0.512658229964965	4.9363823743289e-06	0.182	0.34	t|1e1.1o1|1e2.1o2	FALSE	FALSE	TRUE	2	3	0	chr4	-	ENSG00000163257.11:t:17805107-17805225_17805225-17809537	17809425	17809692	17805225	17809537			4312	chr4:17805225-17809537	chr4:17809425-17809692	267	0	target	novel_donor	FALSE
ELP6	ENSG00000163832.16	ENSG00000163832.16:s:47511148-47511226	-0.152709326807349	0.821886319025722	1.00577233608234e-06	0.765	0.603	s|1e1.1o1|1e2.1o1	FALSE	FALSE	TRUE	2	3	1	chr3	-	ENSG00000163832.16:s:47511148-47511226_47510254-47511148	47504194	47504448	47510254	47511148			894	chr3:47510254-47511148	chr3:47504194-47504448	254	2	source	annotated	FALSE
ELP6	ENSG00000163832.16	ENSG00000163832.16:s:47511148-47511226	0.152709305079471	0.821886090167218	1.00572169735669e-06	0.235	0.397	s|1e1.1o1|1e2.1o1	FALSE	FALSE	TRUE	2	3	1	chr3	-	ENSG00000163832.16:s:47511148-47511226_47504448-47511148	47509956	47510254	47504448	47511148			6700	chr3:47504448-47511148	chr3:47509956-47510254	298	1	source	annotated	FALSE
ELP6	ENSG00000163832.16	ENSG00000163832.16:t:47504194-47504448	0.13264709213606	0.738701208952731	1.31613537844889e-06	0.195	0.331	t|1e1.1o1|1e2.1o3|1e2.2o3	TRUE	FALSE	TRUE	3	3	1	chr3	-	ENSG00000163832.16:t:47504194-47504448_47504448-47511148	47504194	47504448	47504448	47511148			6700	chr3:47504448-47511148	chr3:47504194-47504448	254	2	target	annotated	FALSE
ELP6	ENSG00000163832.16	ENSG00000163832.16:t:47504194-47504448	-0.151462446451037	0.848643128290754	5.48103248565468e-07	0.802	0.649	t|1e1.1o1|1e2.1o3|1e2.2o3	TRUE	FALSE	TRUE	3	3	1	chr3	-	ENSG00000163832.16:t:47504194-47504448_47504448-47510184	47509956	47510254	47504448	47510184			5736	chr3:47504448-47510184	chr3:47509956-47510254	298	1	target	annotated	FALSE
ELP6	ENSG00000163832.16	ENSG00000163832.16:t:47504194-47504448	5.66302407730047e-06	8.56672950273747e-21	0.504035500980169	0.003	0.02	t|1e1.1o1|1e2.1o3|1e2.2o3	TRUE	FALSE	TRUE	3	3	1	chr3	-	ENSG00000163832.16:t:47504194-47504448_47504448-47510149	47511148	47511226	47504448	47510149			5701	chr3:47504448-47510149	chr3:47511148-47511226	78	0	target	annotated	FALSE
TSC1	ENSG00000165699.14	ENSG00000165699.14:t:132935033-132935095	-0.103469375781167	0.520009131258456	3.95005785946978e-06	0.241	0.113	t|1e1.1o1|1e2.1o2|1e2.2o2	TRUE	FALSE	TRUE	3	3	1	chr9	-	ENSG00000165699.14:t:132935033-132935095_132935095-132944572	132935033	132935095	132935095	132944572			9477	chr9:132935095-132944572	chr9:132935033-132935095	62	2	target	annotated	FALSE
TSC1	ENSG00000165699.14	ENSG00000165699.14:t:132935033-132935095	0.000641131658323295	0.000411425423830045	0.00155335773210175	0.037	0.037	t|1e1.1o1|1e2.1o2|1e2.2o2	TRUE	FALSE	TRUE	3	3	1	chr9	-	ENSG00000165699.14:t:132935033-132935095_132935095-132944547	132944543	132944572	132935095	132944547			9452	chr9:132935095-132944547	chr9:132944543-132944572	29	2	target	annotated	FALSE
TSC1	ENSG00000165699.14	ENSG00000165699.14:t:132935033-132935095	0.0997293090420426	0.492740112070442	4.52613033322096e-06	0.722	0.85	t|1e1.1o1|1e2.1o2|1e2.2o2	TRUE	FALSE	TRUE	3	3	1	chr9	-	ENSG00000165699.14:t:132935033-132935095_132935095-132944543	132944572	132944834	132935095	132944543			9448	chr9:132935095-132944543	chr9:132944572-132944834	262	1	target	annotated	FALSE
GOLGA2	ENSG00000167110.17	ENSG00000167110.17:s:128267458-128267517	-0.115466538843779	0.599842933502786	3.09378538310146e-06	0.47	0.339	s|1e1.1o2|1e2.1o1	FALSE	FALSE	TRUE	2	3	1	chr9	-	ENSG00000167110.17:s:128267458-128267517_128267274-128267458	128266287	128266325	128267274	128267458			184	chr9:128267274-128267458	chr9:128266287-128266325	38	2	source	annotated	FALSE
GOLGA2	ENSG00000167110.17	ENSG00000167110.17:s:128267458-128267517	0.115466505347811	0.599842663180888	3.09361213976104e-06	0.53	0.661	s|1e1.1o2|1e2.1o1	FALSE	FALSE	TRUE	2	3	1	chr9	-	ENSG00000167110.17:s:128267458-128267517_128266325-128267458	128267194	128267274	128266325	128267458			1133	chr9:128266325-128267458	chr9:128267194-128267274	80	2	source	annotated	FALSE
JMJD7-PLA2G4B	ENSG00000168970.22	ENSG00000168970.22:s:41844471-41844607	0.121073453117525	0.635778300446162	2.78219435435285e-06	0.72	0.864	s|1e1.1o1|1e2.1o1	FALSE	FALSE	TRUE	2	3	1	chr15	+	ENSG00000168970.22:s:41844471-41844607_41844607-41844848	41844471	41844607	41844607	41844848			241	chr15:41844607-41844848	chr15:41844471-41844607	136	1	source	annotated	FALSE
JMJD7-PLA2G4B	ENSG00000168970.22	ENSG00000168970.22:s:41844471-41844607	-0.121073516996328	0.635778807697367	2.78234440775904e-06	0.28	0.136	s|1e1.1o1|1e2.1o1	FALSE	FALSE	TRUE	2	3	0	chr15	+	ENSG00000168970.22:s:41844471-41844607_41844607-41845203	41844848	41845070	41844607	41845203			596	chr15:41844607-41845203	chr15:41844848-41845070	222	0	source	ambig_gene	FALSE
PTK2	ENSG00000169398.19	ENSG00000169398.19:s:140674298-140674404	-0.14687458061464	0.649115750247952	4.01224386648025e-06	0.377	0.161	s|1e1.2o2|1e2.1o1	FALSE	FALSE	TRUE	2	3	1	chr8	-	ENSG00000169398.19:s:140674298-140674404_140669735-140674298	140668269	140668424	140669735	140674298			4563	chr8:140669735-140674298	chr8:140668269-140668424	155	2	source	annotated	FALSE
PTK2	ENSG00000169398.19	ENSG00000169398.19:s:140674298-140674404	0.146874576275819	0.649115604013446	4.01206841537001e-06	0.623	0.839	s|1e1.2o2|1e2.1o1	FALSE	FALSE	TRUE	2	3	1	chr8	-	ENSG00000169398.19:s:140674298-140674404_140668424-140674298	140669727	140670264	140668424	140674298			5874	chr8:140668424-140674298	chr8:140669727-140670264	537	0	source	annotated	FALSE
PKIA	ENSG00000171033.13	ENSG00000171033.13:t:78598358-78598535	0.104147233985648	0.541619365990804	2.14088816240663e-06	0.155	0.269	t|1e1.1o1|1e2.1o1	FALSE	FALSE	TRUE	2	3	1	chr8	+	ENSG00000171033.13:t:78598358-78598535_78516468-78598358	78516340	78516468	78516468	78598358			81890	chr8:78516468-78598358	chr8:78516340-78516468	128	2	target	annotated	FALSE
PKIA	ENSG00000171033.13	ENSG00000171033.13:t:78598358-78598535	-0.104147182123497	0.541619023840812	2.14102456164156e-06	0.845	0.731	t|1e1.1o1|1e2.1o1	FALSE	FALSE	TRUE	2	3	1	chr8	+	ENSG00000171033.13:t:78598358-78598535_78572939-78598358	78572811	78572939	78572939	78598358			25419	chr8:78572939-78598358	chr8:78572811-78572939	128	2	target	annotated	FALSE
BPTF	ENSG00000171634.18	ENSG00000171634.18:s:67928355-67928601	0.188647560893418	0.961882648119166	1.11514465070158e-07	0.315	0.503	s|1e1.1o1|1e2.1o1	FALSE	FALSE	TRUE	2	3	1	chr17	+	ENSG00000171634.18:s:67928355-67928601_67928601-67928959	67928355	67928601	67928601	67928959			358	chr17:67928601-67928959	chr17:67928355-67928601	246	0	source	annotated	FALSE
BPTF	ENSG00000171634.18	ENSG00000171634.18:s:67928355-67928601	-0.188647556184166	0.9618826349252	1.11519497747459e-07	0.685	0.497	s|1e1.1o1|1e2.1o1	FALSE	FALSE	TRUE	2	3	1	chr17	+	ENSG00000171634.18:s:67928355-67928601_67928601-67929336	67928959	67929120	67928601	67929336			735	chr17:67928601-67929336	chr17:67928959-67929120	161	2	source	annotated	FALSE
BPTF	ENSG00000171634.18	ENSG00000171634.18:t:67886128-67886316	0.0697983558898445	0.285161834917253	8.3891035763366e-06	0.241	0.332	t|1e1.1o1|1e2.1o1|2e3.1o1|2e4.1o1	FALSE	TRUE	TRUE	4	5	1	chr17	+	ENSG00000171634.18:t:67886128-67886316_67875020-67886128	67874817	67875020	67875020	67886128			11108	chr17:67875020-67886128	chr17:67874817-67875020	203	2	target	annotated	FALSE
BPTF	ENSG00000171634.18	ENSG00000171634.18:t:67886128-67886316	-0.112498535703196	0.580706760441306	3.28104957336706e-06	0.703	0.568	t|1e1.1o1|1e2.1o1|2e3.1o1|2e4.1o1	FALSE	TRUE	TRUE	4	5	1	chr17	+	ENSG00000171634.18:t:67886128-67886316_67875744-67886128	67875556	67875744	67875744	67886128			10384	chr17:67875744-67886128	chr17:67875556-67875744	188	2	target	annotated	FALSE
BPTF	ENSG00000171634.18	ENSG00000171634.18:t:67886128-67886316	0.0033188688822551	1.75903871835193e-06	0.112800619573567	0.022	0.038	t|1e1.1o1|1e2.1o1|2e3.1o1|2e4.1o1	FALSE	TRUE	TRUE	4	5	0	chr17	+	ENSG00000171634.18:t:67886128-67886316_67875020-67886131	67886128	67886316	67875020	67886131			11111	chr17:67875020-67886131	chr17:67886128-67886316	188	2	target	novel_acceptor	FALSE
BPTF	ENSG00000171634.18	ENSG00000171634.18:t:67886128-67886316	0.0240442258449682	0.00071117815327652	0.00273847449779536	0.036	0.059	t|1e1.1o1|1e2.1o1|2e3.1o1|2e4.1o1	FALSE	TRUE	TRUE	4	5	0	chr17	+	ENSG00000171634.18:t:67886128-67886316_67875744-67886131			67875744	67886131			10387	chr17:67875744-67886131	chr17:NA-NA			target	novel_acceptor	FALSE
TMCC1	ENSG00000172765.17	ENSG00000172765.17:s:129832758-129832826	0.0319620705034716	0.102299268088545	2.08228958532182e-05	0.628	0.687	s|1e1.1o1|1e2.1o1|1e3.1o1|1e4.1o1	FALSE	FALSE	TRUE	4	5	1	chr3	-	ENSG00000172765.17:s:129832758-129832826_129828508-129832774	129654967	129655103	129828508	129832774			4266	chr3:129828508-129832774	chr3:129654967-129655103	136	1	source	annotated	FALSE
TMCC1	ENSG00000172765.17	ENSG00000172765.17:s:129832758-129832826	-0.128478698101951	0.697486023894081	1.83681246346268e-06	0.249	0.104	s|1e1.1o1|1e2.1o1|1e3.1o1|1e4.1o1	FALSE	FALSE	TRUE	4	5	1	chr3	-	ENSG00000172765.17:s:129832758-129832826_129828077-129832774	129670330	129671264	129828077	129832774			4697	chr3:129828077-129832774	chr3:129670330-129671264	934	1	source	annotated	FALSE
TMCC1	ENSG00000172765.17	ENSG00000172765.17:s:129832758-129832826	0.0125823652248146	0.018020253938731	7.30269949242024e-05	0.11	0.134	s|1e1.1o1|1e2.1o1|1e3.1o1|1e4.1o1	FALSE	FALSE	TRUE	4	5	0	chr3	-	ENSG00000172765.17:s:129832758-129832826_129671264-129832774	129827756	129828077	129671264	129832774			161510	chr3:129671264-129832774	chr3:129827756-129828077	321	0	source	novel_exon_skip	FALSE
TMCC1	ENSG00000172765.17	ENSG00000172765.17:s:129832758-129832826	0.0404106264691245	0.0298246963460949	9.21906744363702e-05	0.015	0.075	s|1e1.1o1|1e2.1o1|1e3.1o1|1e4.1o1	FALSE	FALSE	TRUE	4	5	0	chr3	-	ENSG00000172765.17:s:129832758-129832826_129655103-129832774	129828451	129828508	129655103	129832774			177671	chr3:129655103-129832774	chr3:129828451-129828508	57	0	source	novel_exon_skip	FALSE
TMCC1	ENSG00000172765.17	ENSG00000172765.17:t:129838898-129839060	0.114428379026324	0.554040559039526	4.34874606701887e-06	0.769	0.933	t|1e1.1o1|1e2.2o3	FALSE	FALSE	TRUE	2	3	0	chr3	-	ENSG00000172765.17:t:129838898-129839060_129839060-129880309	129838898	129839060	129839060	129880309			41249	chr3:129839060-129880309	chr3:129838898-129839060	162	0	target	novel_exon_skip	FALSE
TMCC1	ENSG00000172765.17	ENSG00000172765.17:t:129838898-129839060	-0.114428406723882	0.55404086328325	4.3489592050916e-06	0.231	0.067	t|1e1.1o1|1e2.2o3	FALSE	FALSE	TRUE	2	3	1	chr3	-	ENSG00000172765.17:t:129838898-129839060_129839060-129857250	129857248	129857405	129839060	129857250			18190	chr3:129839060-129857250	chr3:129857248-129857405	157	1	target	annotated	FALSE
TMCC1	ENSG00000172765.17	ENSG00000172765.17:t:129848343-129848412	0.10631644342649	0.471059503070602	6.62469601945409e-06	0.414	0.608	t|1e1.1o1|1e2.2o3	FALSE	FALSE	TRUE	2	3	0	chr3	-	ENSG00000172765.17:t:129848343-129848412_129848412-129880309	129848343	129848412	129848412	129880309			31897	chr3:129848412-129880309	chr3:129848343-129848412	69	0	target	novel_exon_skip	FALSE
TMCC1	ENSG00000172765.17	ENSG00000172765.17:t:129848343-129848412	-0.106316433418987	0.471059669594458	6.62496189673956e-06	0.586	0.392	t|1e1.1o1|1e2.2o3	FALSE	FALSE	TRUE	2	3	1	chr3	-	ENSG00000172765.17:t:129848343-129848412_129848412-129857250	129857248	129857405	129848412	129857250			8838	chr3:129848412-129857250	chr3:129857248-129857405	157	1	target	annotated	FALSE
SNHG29	ENSG00000175061.18	ENSG00000175061.18:t:16470302-16470453	0.109959261308089	0.571161081772813	3.05262494606254e-06	0.078	0.209	t|1e1.1o1|1e2.1o4|1e3.1o2|1e3.2o2	TRUE	FALSE	TRUE	4	4	1	chr17	+	ENSG00000175061.18:t:16470302-16470453_16440253-16470302	16440111	16440253	16440253	16470302			30049	chr17:16440253-16470302	chr17:16440111-16440253	142	1	target	annotated	FALSE
SNHG29	ENSG00000175061.18	ENSG00000175061.18:t:16470302-16470453	-0.179563737659536	0.862770163855626	1.21613714709756e-06	0.683	0.478	t|1e1.1o1|1e2.1o4|1e3.1o2|1e3.2o2	TRUE	FALSE	TRUE	4	4	1	chr17	+	ENSG00000175061.18:t:16470302-16470453_16441130-16470302	16441074	16441228	16441130	16470302			29172	chr17:16441130-16470302	chr17:16441074-16441228	154	1	target	annotated	FALSE
SNHG29	ENSG00000175061.18	ENSG00000175061.18:t:16470302-16470453	0.065462234047502	0.226610385329641	1.20435516725013e-05	0.064	0.153	t|1e1.1o1|1e2.1o4|1e3.1o2|1e3.2o2	TRUE	FALSE	TRUE	4	4	1	chr17	+	ENSG00000175061.18:t:16470302-16470453_16463247-16470302	16463164	16463317	16463247	16470302			7055	chr17:16463247-16470302	chr17:16463164-16463317	153	0	target	annotated	FALSE
SNHG29	ENSG00000175061.18	ENSG00000175061.18:t:16470302-16470453	-0.0070646209889879	0.0213895975250835	6.82539853242847e-05	0.175	0.161	t|1e1.1o1|1e2.1o4|1e3.1o2|1e3.2o2	TRUE	FALSE	TRUE	4	4	1	chr17	+	ENSG00000175061.18:t:16470302-16470453_16463317-16470302	16470302	16470453	16463317	16470302			6985	chr17:16463317-16470302	chr17:16470302-16470453	151	1	target	annotated	FALSE
ZBTB8OS	ENSG00000176261.15	ENSG00000176261.15:t:32627508-32627544	-0.00339153643479098	0.00307449255205217	0.000268131757422796	0.176	0.169	t|1e1.1o3|1e2.1o2|1e3.1o1|1e4.1o1|1e5.1o2	FALSE	FALSE	TRUE	5	6	0	chr1	-	ENSG00000176261.15:t:32627508-32627544_32627544-32650433	32627508	32627544	32627544	32650433			22889	chr1:32627544-32650433	chr1:32627508-32627544	36	0	target	novel_exon_skip	FALSE
ZBTB8OS	ENSG00000176261.15	ENSG00000176261.15:t:32627508-32627544	0.0376087706355731	0.0316056900898307	8.00744786364131e-05	0.127	0.177	t|1e1.1o3|1e2.1o2|1e3.1o1|1e4.1o1|1e5.1o2	FALSE	FALSE	TRUE	5	6	1	chr1	-	ENSG00000176261.15:t:32627508-32627544_32627544-32634768	32631825	32632058	32627544	32634768			7224	chr1:32627544-32634768	chr1:32631825-32632058	233	2	target	annotated	FALSE
ZBTB8OS	ENSG00000176261.15	ENSG00000176261.15:t:32627508-32627544	0.0564860348784946	0.157976051610777	1.47747023034932e-05	0.141	0.214	t|1e1.1o3|1e2.1o2|1e3.1o1|1e4.1o1|1e5.1o2	FALSE	FALSE	TRUE	5	6	1	chr1	-	ENSG00000176261.15:t:32627508-32627544_32627544-32633645	32633262	32633354	32627544	32633645			6101	chr1:32627544-32633645	chr1:32633262-32633354	92	2	target	annotated	FALSE
ZBTB8OS	ENSG00000176261.15	ENSG00000176261.15:t:32627508-32627544	7.97886243217206e-05	8.5887414469819e-21	0.476521109852184	0.021	0.025	t|1e1.1o3|1e2.1o2|1e3.1o1|1e4.1o1|1e5.1o2	FALSE	FALSE	TRUE	5	6	1	chr1	-	ENSG00000176261.15:t:32627508-32627544_32627544-32633262	32633645	32633727	32627544	32633262			5718	chr1:32627544-32633262	chr1:32633645-32633727	82	1	target	annotated	FALSE
ZBTB8OS	ENSG00000176261.15	ENSG00000176261.15:t:32627508-32627544	-0.1051487086893	0.542262386810333	3.21682478077179e-06	0.53	0.417	t|1e1.1o3|1e2.1o2|1e3.1o1|1e4.1o1|1e5.1o2	FALSE	FALSE	TRUE	5	6	1	chr1	-	ENSG00000176261.15:t:32627508-32627544_32627544-32631827	32634702	32634792	32627544	32631827			4283	chr1:32627544-32631827	chr1:32634702-32634792	90	0	target	annotated	FALSE
LCORL	ENSG00000178177.15	ENSG00000178177.15:t:17841199-17845901	0.136652468212086	0.664750447901931	3.14848191170565e-06	0.567	0.747	t|1e1.1o1|1e2.1o1|1e3.1o1	FALSE	FALSE	TRUE	3	4	1	chr4	-	ENSG00000178177.15:t:17841199-17845901_17845901-17909094	17841199	17845901	17845901	17909094			63193	chr4:17845901-17909094	chr4:17841199-17845901	4702	1	target	annotated	FALSE
LCORL	ENSG00000178177.15	ENSG00000178177.15:t:17841199-17845901	-0.115857716675192	0.57476759903922	3.89550800472538e-06	0.34	0.185	t|1e1.1o1|1e2.1o1|1e3.1o1	FALSE	FALSE	TRUE	3	4	1	chr4	-	ENSG00000178177.15:t:17841199-17845901_17845901-17886068	17873388	17876834	17845901	17886068			40167	chr4:17845901-17886068	chr4:17873388-17876834	3446	2	target	annotated	FALSE
LCORL	ENSG00000178177.15	ENSG00000178177.15:t:17841199-17845901	-0.0123848665175904	0.0191198851805943	6.95388248680429e-05	0.092	0.068	t|1e1.1o1|1e2.1o1|1e3.1o1	FALSE	FALSE	TRUE	3	4	1	chr4	-	ENSG00000178177.15:t:17841199-17845901_17845901-17873388	17886068	17886161	17845901	17873388			27487	chr4:17845901-17873388	chr4:17886068-17886161	93	0	target	annotated	FALSE
ZNF594	ENSG00000180626.10	ENSG00000180626.10:s:5191432-5191868	0.125249315270078	0.601892658615145	3.90062179104296e-06	0.574	0.748	s|1e1.2o3|2e1.2o3	TRUE	FALSE	FALSE	2	2	1	chr17	-	ENSG00000180626.10:s:5191432-5191868_5184276-5191748	5179535	5184397	5184276	5191748			7472	chr17:5184276-5191748	chr17:5179535-5184397	4862	2	source	annotated	FALSE
ZNF594	ENSG00000180626.10	ENSG00000180626.10:s:5191432-5191868	-0.125249325559465	0.601892851465354	3.90081589229929e-06	0.426	0.252	s|1e1.2o3|2e1.2o3	TRUE	FALSE	FALSE	2	2	1	chr17	-	ENSG00000180626.10:s:5191432-5191868_5184276-5191432	5191432	5191868	5184276	5191432			7156	chr17:5184276-5191432	chr17:5191432-5191868	436	1	source	annotated	FALSE
ZNF708	ENSG00000182141.10	ENSG00000182141.10:s:21329210-21329425	0.0101860977681803	0.0161856572900991	7.90928946193675e-05	0.167	0.188	s|1e1.1o1|1e2.1o1|1e3.1o1	FALSE	FALSE	TRUE	3	4	1	chr19	-	ENSG00000182141.10:s:21329210-21329425_21328141-21329210	21309246	21309341	21328141	21329210			1069	chr19:21328141-21329210	chr19:21309246-21309341	95	2	source	annotated	FALSE
ZNF708	ENSG00000182141.10	ENSG00000182141.10:s:21329210-21329425	0.188724621858924	0.919234375785932	5.91482479032503e-07	0.465	0.667	s|1e1.1o1|1e2.1o1|1e3.1o1	FALSE	FALSE	TRUE	3	4	1	chr19	-	ENSG00000182141.10:s:21329210-21329425_21310627-21329210	21310501	21310627	21310627	21329210			18583	chr19:21310627-21329210	chr19:21310501-21310627	126	0	source	annotated	FALSE
ZNF708	ENSG00000182141.10	ENSG00000182141.10:s:21329210-21329425	-0.215032951194775	0.984629784901556	6.88076876587118e-08	0.369	0.146	s|1e1.1o1|1e2.1o1|1e3.1o1	FALSE	FALSE	TRUE	3	4	1	chr19	-	ENSG00000182141.10:s:21329210-21329425_21309341-21329210	21327960	21328141	21309341	21329210			19869	chr19:21309341-21329210	chr19:21327960-21328141	181	1	source	annotated	FALSE
ZNF708	ENSG00000182141.10	ENSG00000182141.10:t:21309246-21309341	-0.157552189201551	0.820764214260737	1.27439908559346e-06	0.364	0.188	t|1e1.1o1|1e2.1o1	FALSE	FALSE	TRUE	2	3	1	chr19	-	ENSG00000182141.10:t:21309246-21309341_21309341-21329210	21309246	21309341	21309341	21329210			19869	chr19:21309341-21329210	chr19:21309246-21309341	95	2	target	annotated	FALSE
ZNF708	ENSG00000182141.10	ENSG00000182141.10:t:21309246-21309341	0.157552194999093	0.820764188078595	1.27433424509745e-06	0.636	0.812	t|1e1.1o1|1e2.1o1	FALSE	FALSE	TRUE	2	3	1	chr19	-	ENSG00000182141.10:t:21309246-21309341_21309341-21310501	21310501	21310627	21309341	21310501			1160	chr19:21309341-21310501	chr19:21310501-21310627	126	0	target	annotated	FALSE
FAM227A	ENSG00000184949.16	ENSG00000184949.16:t:38638746-38638822	-0.0660286113016556	0.268891181323927	8.5573894609281e-06	0.139	0.044	t|1e1.1o1|1e2.1o2|1e2.2o2	TRUE	FALSE	TRUE	3	3	1	chr22	-	ENSG00000184949.16:t:38638746-38638822_38638822-38645563	38638746	38638822	38638822	38645563			6741	chr22:38638822-38645563	chr22:38638746-38638822	76	1	target	annotated	FALSE
FAM227A	ENSG00000184949.16	ENSG00000184949.16:t:38638746-38638822	-0.0449179958981352	0.207230593158845	1.28607314678897e-05	0.439	0.342	t|1e1.1o1|1e2.1o2|1e2.2o2	TRUE	FALSE	TRUE	3	3	1	chr22	-	ENSG00000184949.16:t:38638746-38638822_38638822-38639655	38639615	38639724	38638822	38639655			833	chr22:38638822-38639655	chr22:38639615-38639724	109	1	target	annotated	FALSE
FAM227A	ENSG00000184949.16	ENSG00000184949.16:t:38638746-38638822	0.126063012471247	0.576320794623182	4.63098315445221e-06	0.423	0.614	t|1e1.1o1|1e2.1o2|1e2.2o2	TRUE	FALSE	TRUE	3	3	1	chr22	-	ENSG00000184949.16:t:38638746-38638822_38638822-38639615	38645563	38645645	38638822	38639615			793	chr22:38638822-38639615	chr22:38645563-38645645	82	1	target	annotated	FALSE
GNB1L	ENSG00000185838.14	ENSG00000185838.14:s:19854443-19854539	0.624416345288171	1	1.42689789511913e-16	0.003	0.635	s|1e1.1o1|1e2.1o1|1e3.1o1	FALSE	FALSE	TRUE	3	4	0	chr22	-	ENSG00000185838.14:s:19854443-19854539_19824077-19854443	19812285	19812447	19824077	19854443			30366	chr22:19824077-19854443	chr22:19812285-19812447	162	0	source	ambig_gene	TRUE
GNB1L	ENSG00000185838.14	ENSG00000185838.14:s:19854443-19854539	-0.464011624676852	0.999976958695025	1.15867847538809e-08	0.776	0.319	s|1e1.1o1|1e2.1o1|1e3.1o1	FALSE	FALSE	TRUE	3	4	1	chr22	-	ENSG00000185838.14:s:19854443-19854539_19821375-19854443	19821228	19821375	19821375	19854443			33068	chr22:19821375-19854443	chr22:19821228-19821375	147	0	source	annotated	FALSE
GNB1L	ENSG00000185838.14	ENSG00000185838.14:s:19854443-19854539	-0.152403603952688	0.799198310162799	1.41421740462722e-06	0.221	0.047	s|1e1.1o1|1e2.1o1|1e3.1o1	FALSE	FALSE	TRUE	3	4	1	chr22	-	ENSG00000185838.14:s:19854443-19854539_19812447-19854443	19823987	19824077	19812447	19854443			41996	chr22:19812447-19854443	chr22:19823987-19824077	90	0	source	annotated	FALSE
GNB1L	ENSG00000185838.14	ENSG00000185838.14:t:19812285-19812447	-0.190200088364249	0.9156773116547	6.4494119400571e-07	0.259	0.048	t|1e1.1o1|1e2.1o1	FALSE	FALSE	TRUE	2	3	1	chr22	-	ENSG00000185838.14:t:19812285-19812447_19812447-19854443	19812285	19812447	19812447	19854443			41996	chr22:19812447-19854443	chr22:19812285-19812447	162	0	target	annotated	FALSE
GNB1L	ENSG00000185838.14	ENSG00000185838.14:t:19812285-19812447	0.190200087412931	0.915677273494684	6.44911527964628e-07	0.741	0.952	t|1e1.1o1|1e2.1o1	FALSE	FALSE	TRUE	2	3	1	chr22	-	ENSG00000185838.14:t:19812285-19812447_19812447-19820598	19820598	19820723	19812447	19820598			8151	chr22:19812447-19820598	chr22:19820598-19820723	125	2	target	annotated	FALSE
GNB1L	ENSG00000185838.14	ENSG00000185838.14:t:19854443-19854539	-0.047576176135367	0.179290463897862	0.000145036738234183	0.27	0.19	t|1e1.1o1|1e2.1o1|i	FALSE	FALSE	TRUE	3	3	1	chr22	-	ENSG00000185838.14:t:19854443-19854539_19854539-19854820	19854443	19854539	19854539	19854820	19854540	19854681	281	chr22:19854539-19854820	chr22:19854443-19854539	96	0	target	annotated	FALSE
GNB1L	ENSG00000185838.14	ENSG00000185838.14:t:19854443-19854539	-0.0473165514366598	0.0336375669405405	0.00124507227057935	0.079	0.012	t|1e1.1o1|1e2.1o1|i	FALSE	FALSE	TRUE	3	3	1	chr22	-	ENSG00000185838.14:t:19854443-19854539_19854539-19854682	19854682	19854816	19854539	19854682			143	chr22:19854539-19854682	chr22:19854682-19854816	134	2	target	annotated	FALSE
GNB1L	ENSG00000185838.14	ENSG00000185838.14:t:19854443-19854539	0.12011918725363	0.625515415196767	2.99708886569246e-05	0.651	0.798	t|1e1.1o1|1e2.1o1|i	FALSE	FALSE	TRUE	3	3	1	chr22	-	ENSG00000185838.14:t:19854443-19854539_19854540-19854681	19854820	19854939	19854540	19854681			141	chr22:19854540-19854681	chr22:19854820-19854939	119	2	target	none	FALSE
RALGAPA2	ENSG00000188559.15	ENSG00000188559.15:s:20495117-20495275	0.231651703246717	0.997069874962342	9.2743272752428e-10	0.002	0.261	s|1e1.1o1|1e2.1o1	FALSE	FALSE	TRUE	2	3	0	chr20	-	ENSG00000188559.15:s:20495117-20495275_20491001-20495117		20491001	20491001	20495117			4116	chr20:20491001-20495117	chr20:nan-20491001			source	novel_acceptor	TRUE
RALGAPA2	ENSG00000188559.15	ENSG00000188559.15:s:20495117-20495275	-0.231651716664242	0.99706989651659	9.26782539600879e-10	0.998	0.739	s|1e1.1o1|1e2.1o1	FALSE	FALSE	TRUE	2	3	1	chr20	-	ENSG00000188559.15:s:20495117-20495275_20472956-20495117	20470933	20472956	20472956	20495117			22161	chr20:20472956-20495117	chr20:20470933-20472956	2023	1	source	annotated	FALSE
ZKSCAN3	ENSG00000189298.14	ENSG00000189298.14:s:28349947-28350067	-0.29299138164511	0.992443308877893	1.72442254031679e-07	0.854	0.543	s|1e1.1o1|1e2.1o1	FALSE	FALSE	TRUE	2	3	1	chr6	+	ENSG00000189298.14:s:28349947-28350067_28350067-28359525	28349947	28350067	28350067	28359525			9458	chr6:28350067-28359525	chr6:28349947-28350067	120	0	source	annotated	FALSE
ZKSCAN3	ENSG00000189298.14	ENSG00000189298.14:s:28349947-28350067	0.292991366005574	0.992443289994928	1.7243569518487e-07	0.146	0.457	s|1e1.1o1|1e2.1o1	FALSE	FALSE	TRUE	2	3	1	chr6	+	ENSG00000189298.14:s:28349947-28350067_28350067-28361324	28359525	28360001	28350067	28361324			11257	chr6:28350067-28361324	chr6:28359525-28360001	476	2	source	annotated	FALSE
NIF3L1	ENSG00000196290.15	ENSG00000196290.15:t:200891915-200892379	0.00939383985140912	0.00557715453541064	0.0023742108993979	0.052	0.07	t|1e1.1o1|1e2.1o1|1e3.1o1|2e4.1o1|2e5.1o1|i	FALSE	TRUE	TRUE	6	6	0	chr2	+	ENSG00000196290.15:t:200891915-200892379_200889391-200891918	200889327	200889391	200889391	200891918	200891790	200891914	2527	chr2:200889391-200891918	chr2:200889327-200889391	64	1	target	novel_combo	FALSE
NIF3L1	ENSG00000196290.15	ENSG00000196290.15:t:200891915-200892379	0.00423260614188424	0.0122262245018062	0.0010958176242927	0.168	0.179	t|1e1.1o1|1e2.1o1|1e3.1o1|2e4.1o1|2e5.1o1|i	FALSE	TRUE	TRUE	6	6	1	chr2	+	ENSG00000196290.15:t:200891915-200892379_200889652-200891918	200889415	200889652	200889652	200891918			2266	chr2:200889652-200891918	chr2:200889415-200889652	237	0	target	annotated	FALSE
NIF3L1	ENSG00000196290.15	ENSG00000196290.15:t:200891915-200892379	0.00760443847562284	0.000492401428204274	0.0152308065982296	0.018	0.045	t|1e1.1o1|1e2.1o1|1e3.1o1|2e4.1o1|2e5.1o1|i	FALSE	TRUE	TRUE	6	6	1	chr2	+	ENSG00000196290.15:t:200891915-200892379_200890585-200891918	200890523	200890585	200890585	200891918			1333	chr2:200890585-200891918	chr2:200890523-200890585	62	2	target	annotated	FALSE
NIF3L1	ENSG00000196290.15	ENSG00000196290.15:t:200891915-200892379	-0.0027456322078713	0.00245368361501332	0.00294257077798865	0.077	0.071	t|1e1.1o1|1e2.1o1|1e3.1o1|2e4.1o1|2e5.1o1|i	FALSE	TRUE	TRUE	6	6	1	chr2	+	ENSG00000196290.15:t:200891915-200892379_200889391-200891969	200891915	200892379	200889391	200891969			2578	chr2:200889391-200891969	chr2:200891915-200892379	464	2	target	annotated	FALSE
NIF3L1	ENSG00000196290.15	ENSG00000196290.15:t:200891915-200892379	0.0922726191604692	0.449585725791501	5.41375352156384e-05	0.17	0.289	t|1e1.1o1|1e2.1o1|1e3.1o1|2e4.1o1|2e5.1o1|i	FALSE	TRUE	TRUE	6	6	1	chr2	+	ENSG00000196290.15:t:200891915-200892379_200889652-200891969			200889652	200891969			2317	chr2:200889652-200891969	chr2:NA-NA			target	annotated	FALSE
NIF3L1	ENSG00000196290.15	ENSG00000196290.15:t:200891915-200892379	-0.142675709418623	0.743396714290337	1.85423755919567e-05	0.514	0.344	t|1e1.1o1|1e2.1o1|1e3.1o1|2e4.1o1|2e5.1o1|i	FALSE	TRUE	TRUE	6	6	1	chr2	+	ENSG00000196290.15:t:200891915-200892379_200891790-200891914			200891790	200891914			124	chr2:200891790-200891914	chr2:NA-NA			target	none	FALSE
NF1	ENSG00000196712.17	ENSG00000196712.17:s:31201411-31201485	-0.110740689371267	0.560705594942306	3.74966790250841e-06	0.273	0.133	s|1e1.1o1|1e2.1o1	FALSE	FALSE	TRUE	2	3	0	chr17	+	ENSG00000196712.17:s:31201411-31201485_31201485-31203102	31201411	31201485	31201485	31203102			1617	chr17:31201485-31203102	chr17:31201411-31201485	74	2	source	novel_acceptor	FALSE
NF1	ENSG00000196712.17	ENSG00000196712.17:s:31201411-31201485	0.110740634861132	0.560705070946307	3.74946588531478e-06	0.727	0.867	s|1e1.1o1|1e2.1o1	FALSE	FALSE	TRUE	2	3	1	chr17	+	ENSG00000196712.17:s:31201411-31201485_31201485-31206240	31203102	31203131	31201485	31206240			4755	chr17:31201485-31206240	chr17:31203102-31203131	29	2	source	annotated	FALSE
SVIL	ENSG00000197321.14	ENSG00000197321.14:s:29529705-29529844	-0.22602110240855	0.985070801658747	7.98164498938547e-08	0.943	0.702	s|1e1.1o1|1e2.1o1	FALSE	FALSE	TRUE	2	3	1	chr10	-	ENSG00000197321.14:s:29529705-29529844_29527056-29529705	29524472	29524715	29527056	29529705			2649	chr10:29527056-29529705	chr10:29524472-29524715	243	0	source	annotated	FALSE
SVIL	ENSG00000197321.14	ENSG00000197321.14:s:29529705-29529844	0.226021111363845	0.985070825434469	7.98125332898226e-08	0.057	0.298	s|1e1.1o1|1e2.1o1	FALSE	FALSE	TRUE	2	3	1	chr10	-	ENSG00000197321.14:s:29529705-29529844_29524715-29529705	29526961	29527056	29524715	29529705			4990	chr10:29524715-29529705	chr10:29526961-29527056	95	2	source	annotated	FALSE
SVIL	ENSG00000197321.14	ENSG00000197321.14:t:29524472-29524715	0.202367918004273	0.922246180307838	7.40938771636162e-07	0.098	0.324	t|1e1.1o1|1e2.1o1	FALSE	FALSE	TRUE	2	3	1	chr10	-	ENSG00000197321.14:t:29524472-29524715_29524715-29529705	29524472	29524715	29524715	29529705			4990	chr10:29524715-29529705	chr10:29524472-29524715	243	0	target	annotated	FALSE
SVIL	ENSG00000197321.14	ENSG00000197321.14:t:29524472-29524715	-0.202367880449221	0.922246201284854	7.40972652901739e-07	0.902	0.676	t|1e1.1o1|1e2.1o1	FALSE	FALSE	TRUE	2	3	1	chr10	-	ENSG00000197321.14:t:29524472-29524715_29524715-29526961	29526961	29527056	29524715	29526961			2246	chr10:29524715-29526961	chr10:29526961-29527056	95	2	target	annotated	FALSE
NOL8	ENSG00000198000.12	ENSG00000198000.12:t:92324023-92324251	-0.0159620031005353	0.00396565828114497	0.000347299332287832	0.055	0.028	t|1e1.1o1|1e2.1o1|1e3.1o2	FALSE	FALSE	TRUE	3	4	1	chr9	-	ENSG00000198000.12:t:92324023-92324251_92324209-92325318	92324023	92324251	92324209	92325318			1109	chr9:92324209-92325318	chr9:92324023-92324251	228	0	target	annotated	FALSE
NOL8	ENSG00000198000.12	ENSG00000198000.12:t:92324023-92324251	0.140213461803238	0.722846257392606	2.1883659650415e-06	0.126	0.292	t|1e1.1o1|1e2.1o1|1e3.1o2	FALSE	FALSE	TRUE	3	4	1	chr9	-	ENSG00000198000.12:t:92324023-92324251_92324209-92325306	92324906	92325292	92324209	92325306			1097	chr9:92324209-92325306	chr9:92324906-92325292	386	2	target	annotated	FALSE
NOL8	ENSG00000198000.12	ENSG00000198000.12:t:92324023-92324251	-0.102339516125861	0.500781745457384	4.69355321841558e-06	0.818	0.68	t|1e1.1o1|1e2.1o1|1e3.1o2	FALSE	FALSE	TRUE	3	4	1	chr9	-	ENSG00000198000.12:t:92324023-92324251_92324209-92325180	92325306	92325312	92324209	92325180			971	chr9:92324209-92325180	chr9:92325306-92325312	6	0	target	annotated	FALSE
DDX39B	ENSG00000198563.14	ENSG00000198563.14:s:31541950-31542448	7.77155965710684e-16	8.56558349536148e-21	0.999999999943745	0.001	0.002	s|1e1.1o1|1e2.1o5|1e2.4o5|1e2.5o5	FALSE	TRUE	TRUE	4	3	1	chr6	-	ENSG00000198563.14:s:31541950-31542448_31541327-31541950	31540322	31540664	31541327	31541950			623	chr6:31541327-31541950	chr6:31540322-31540664	342	0	source	annotated	FALSE
DDX39B	ENSG00000198563.14	ENSG00000198563.14:s:31541950-31542448	-0.128129443134501	0.705209828893431	1.38566659313444e-06	0.605	0.463	s|1e1.1o1|1e2.1o5|1e2.4o5|1e2.5o5	FALSE	TRUE	TRUE	4	3	1	chr6	-	ENSG00000198563.14:s:31541950-31542448_31540664-31541950	31541153	31541327	31540664	31541950			1286	chr6:31540664-31541950	chr6:31541153-31541327	174	0	source	annotated	FALSE
DDX39B	ENSG00000198563.14	ENSG00000198563.14:s:31541950-31542448	0.105975954177403	0.547376696475463	3.08546134758199e-06	0.382	0.501	s|1e1.1o1|1e2.1o5|1e2.4o5|1e2.5o5	FALSE	TRUE	TRUE	4	3	1	chr6	-	ENSG00000198563.14:s:31541950-31542448_31540534-31541950	31541950	31542448	31540534	31541950			1416	chr6:31540534-31541950	chr6:31541950-31542448	498	0	source	annotated	FALSE
DDX39B	ENSG00000198563.14	ENSG00000198563.14:s:31541950-31542448	0.000182159830076585	8.60205151891441e-21	0.475950493915675	0.013	0.031	s|1e1.1o1|1e2.1o5|1e2.4o5|1e2.5o5	FALSE	TRUE	TRUE	4	3	0	chr6	-	ENSG00000198563.14:s:31541950-31542448_31540401-31541950			31540401	31541950			1549	chr6:31540401-31541950	chr6:NA-NA			source	ambig_gene	FALSE
DDX39B	ENSG00000198563.14	ENSG00000198563.14:t:31540322-31540664	-0.115291719790109	0.626645521037996	2.07013016226831e-05	0.489	0.366	t|1e1.1o1|1e2.1o1|1e3.1o1|1e4.1o1|1e5.1o1|2e6.1o1|2e7.1o1|2e8.1o1|3e9.1o1|i	FALSE	TRUE	TRUE	10	10	1	chr6	-	ENSG00000198563.14:t:31540322-31540664_31540664-31541950	31540322	31540664	31540664	31541950	31540665	31541152	1286	chr6:31540664-31541950	chr6:31540322-31540664	342	0	target	annotated	FALSE
DDX39B	ENSG00000198563.14	ENSG00000198563.14:t:31540322-31540664	7.77155985295739e-16	7.29950855916768e-21	0.999999999007135	0.005	0.003	t|1e1.1o1|1e2.1o1|1e3.1o1|1e4.1o1|1e5.1o1|2e6.1o1|2e7.1o1|2e8.1o1|3e9.1o1|i	FALSE	TRUE	TRUE	10	10	1	chr6	-	ENSG00000198563.14:t:31540322-31540664_31540664-31541833	31541153	31541327	31540664	31541833			1169	chr6:31540664-31541833	chr6:31541153-31541327	174	0	target	annotated	FALSE
DDX39B	ENSG00000198563.14	ENSG00000198563.14:t:31540322-31540664	7.77155985295739e-16	7.29950855916768e-21	0.999999999007135	0.014	0.015	t|1e1.1o1|1e2.1o1|1e3.1o1|1e4.1o1|1e5.1o1|2e6.1o1|2e7.1o1|2e8.1o1|3e9.1o1|i	FALSE	TRUE	TRUE	10	10	0	chr6	-	ENSG00000198563.14:t:31540322-31540664_31540664-31541634	31541396	31541531	31540664	31541634			970	chr6:31540664-31541634	chr6:31541396-31541531	135	0	target	ambig_gene	FALSE
DDX39B	ENSG00000198563.14	ENSG00000198563.14:t:31540322-31540664	7.77155985295739e-16	7.29950855916768e-21	0.999999999007135	0.004	0.004	t|1e1.1o1|1e2.1o1|1e3.1o1|1e4.1o1|1e5.1o1|2e6.1o1|2e7.1o1|2e8.1o1|3e9.1o1|i	FALSE	TRUE	TRUE	10	10	1	chr6	-	ENSG00000198563.14:t:31540322-31540664_31540664-31541396	31541634	31541729	31540664	31541396			732	chr6:31540664-31541396	chr6:31541634-31541729	95	2	target	annotated	FALSE
DDX39B	ENSG00000198563.14	ENSG00000198563.14:t:31540322-31540664	1.38531063344249e-08	7.29951278565993e-21	0.526324193809388	0.014	0.022	t|1e1.1o1|1e2.1o1|1e3.1o1|1e4.1o1|1e5.1o1|2e6.1o1|2e7.1o1|2e8.1o1|3e9.1o1|i	FALSE	TRUE	TRUE	10	10	1	chr6	-	ENSG00000198563.14:t:31540322-31540664_31540664-31541153	31541833	31541937	31540664	31541153			489	chr6:31540664-31541153	chr6:31541833-31541937	104	2	target	annotated	FALSE
DDX39B	ENSG00000198563.14	ENSG00000198563.14:t:31540322-31540664	0.0716993642863299	0.278992609111888	0.000103972807675712	0.305	0.386	t|1e1.1o1|1e2.1o1|1e3.1o1|1e4.1o1|1e5.1o1|2e6.1o1|2e7.1o1|2e8.1o1|3e9.1o1|i	FALSE	TRUE	TRUE	10	10	1	chr6	-	ENSG00000198563.14:t:31540322-31540664_31540534-31541950	31541950	31542448	31540534	31541950			1416	chr6:31540534-31541950	chr6:31541950-31542448	498	0	target	annotated	FALSE
DDX39B	ENSG00000198563.14	ENSG00000198563.14:t:31540322-31540664	4.24356346222339e-06	7.30064620837252e-21	0.475185597838234	0.021	0.028	t|1e1.1o1|1e2.1o1|1e3.1o1|1e4.1o1|1e5.1o1|2e6.1o1|2e7.1o1|2e8.1o1|3e9.1o1|i	FALSE	TRUE	TRUE	10	10	1	chr6	-	ENSG00000198563.14:t:31540322-31540664_31540534-31541634			31540534	31541634			1100	chr6:31540534-31541634	chr6:NA-NA			target	annotated	FALSE
DDX39B	ENSG00000198563.14	ENSG00000198563.14:t:31540322-31540664	7.77155985295739e-16	7.29950855916768e-21	0.999999999007135	0.004	0.006	t|1e1.1o1|1e2.1o1|1e3.1o1|1e4.1o1|1e5.1o1|2e6.1o1|2e7.1o1|2e8.1o1|3e9.1o1|i	FALSE	TRUE	TRUE	10	10	1	chr6	-	ENSG00000198563.14:t:31540322-31540664_31540534-31541153			31540534	31541153			619	chr6:31540534-31541153	chr6:NA-NA			target	annotated	FALSE
DDX39B	ENSG00000198563.14	ENSG00000198563.14:t:31540322-31540664	4.29176465036112e-07	7.29962118932349e-21	0.476829749869018	0.011	0.025	t|1e1.1o1|1e2.1o1|1e3.1o1|1e4.1o1|1e5.1o1|2e6.1o1|2e7.1o1|2e8.1o1|3e9.1o1|i	FALSE	TRUE	TRUE	10	10	0	chr6	-	ENSG00000198563.14:t:31540322-31540664_31540401-31541950			31540401	31541950			1549	chr6:31540401-31541950	chr6:NA-NA			target	ambig_gene	FALSE
DDX39B	ENSG00000198563.14	ENSG00000198563.14:t:31540322-31540664	0.00307178386150663	1.75230240240401e-05	0.191676034959633	0.115	0.123	t|1e1.1o1|1e2.1o1|1e3.1o1|1e4.1o1|1e5.1o1|2e6.1o1|2e7.1o1|2e8.1o1|3e9.1o1|i	FALSE	TRUE	TRUE	10	10	1	chr6	-	ENSG00000198563.14:t:31540322-31540664_31540665-31541152			31540665	31541152			487	chr6:31540665-31541152	chr6:NA-NA			target	none	FALSE
HMGN1	ENSG00000205581.11	ENSG00000205581.11:s:39347995-39348339	0.00120169884086521	7.62778612020904e-21	0.475000632892249	0.036	0.042	s|1e1.1o1|1e2.1o2|1e2.2o2|1e3.1o1|1e4.1o1|i	FALSE	TRUE	TRUE	6	5	1	chr21	-	ENSG00000205581.11:s:39347995-39348339_39347952-39348292	39345146	39345274	39347952	39348292	39347953	39347994	340	chr21:39347952-39348292	chr21:39345146-39345274	128	2	source	annotated	FALSE
HMGN1	ENSG00000205581.11	ENSG00000205581.11:s:39347995-39348339	0.076537108436009	0.288088592217371	8.05083074473398e-05	0.042	0.104	s|1e1.1o1|1e2.1o2|1e2.2o2|1e3.1o1|1e4.1o1|i	FALSE	TRUE	TRUE	6	5	1	chr21	-	ENSG00000205581.11:s:39347995-39348339_39347483-39348292	39345830	39345958	39347483	39348292			809	chr21:39347483-39348292	chr21:39345830-39345958	128	2	source	annotated	FALSE
HMGN1	ENSG00000205581.11	ENSG00000205581.11:s:39347995-39348339	7.77155985295739e-16	7.29950855916768e-21	0.999999999007135	0.019	0.025	s|1e1.1o1|1e2.1o2|1e2.2o2|1e3.1o1|1e4.1o1|i	FALSE	TRUE	TRUE	6	5	1	chr21	-	ENSG00000205581.11:s:39347995-39348339_39347478-39348292	39347336	39347483	39347478	39348292			814	chr21:39347478-39348292	chr21:39347336-39347483	147	0	source	annotated	FALSE
HMGN1	ENSG00000205581.11	ENSG00000205581.11:s:39347995-39348339	0.00932923093056146	1.10823197503121e-20	0.475000040994181	0.046	0.05	s|1e1.1o1|1e2.1o2|1e2.2o2|1e3.1o1|1e4.1o1|i	FALSE	TRUE	TRUE	6	5	1	chr21	-	ENSG00000205581.11:s:39347995-39348339_39345958-39348292	39347492	39347952	39345958	39348292			2334	chr21:39345958-39348292	chr21:39347492-39347952	460	1	source	annotated	FALSE
HMGN1	ENSG00000205581.11	ENSG00000205581.11:s:39347995-39348339	-0.160028734280299	0.951363201164563	3.32257517166035e-07	0.736	0.577	s|1e1.1o1|1e2.1o2|1e2.2o2|1e3.1o1|1e4.1o1|i	FALSE	TRUE	TRUE	6	5	1	chr21	-	ENSG00000205581.11:s:39347995-39348339_39345274-39348292	39347995	39348339	39345274	39348292			3018	chr21:39345274-39348292	chr21:39347995-39348339	344	2	source	annotated	FALSE
HMGN1	ENSG00000205581.11	ENSG00000205581.11:s:39347995-39348339	0.078189328037461	0.289278781065799	8.54109046768837e-05	0.119	0.196	s|1e1.1o1|1e2.1o2|1e2.2o2|1e3.1o1|1e4.1o1|i	FALSE	TRUE	TRUE	6	5	0	chr21	-	ENSG00000205581.11:s:39347995-39348339_39347953-39347994			39347953	39347994			41	chr21:39347953-39347994	chr21:NA-NA			source	none	FALSE
HMGN1	ENSG00000205581.11	ENSG00000205581.11:t:39345146-39345274	-0.144518568337265	0.848581820507188	5.58010049356295e-06	0.565	0.414	t|1e1.1o3|1e2.1o2|1e3.1o3|1e4.1o1|i	FALSE	FALSE	TRUE	5	5	1	chr21	-	ENSG00000205581.11:t:39345146-39345274_39345274-39348292	39345146	39345274	39345274	39348292	39345275	39345829	3018	chr21:39345274-39348292	chr21:39345146-39345274	128	2	target	annotated	FALSE
HMGN1	ENSG00000205581.11	ENSG00000205581.11:t:39345146-39345274	7.77155985295739e-16	7.29950855916768e-21	0.999999999007135	0.014	0.017	t|1e1.1o3|1e2.1o2|1e3.1o3|1e4.1o1|i	FALSE	FALSE	TRUE	5	5	1	chr21	-	ENSG00000205581.11:t:39345146-39345274_39345274-39347379	39345830	39345958	39345274	39347379			2105	chr21:39345274-39347379	chr21:39345830-39345958	128	2	target	annotated	FALSE
HMGN1	ENSG00000205581.11	ENSG00000205581.11:t:39345146-39345274	7.77155985295739e-16	7.29950855916768e-21	0.999999999007135	0.003	0.003	t|1e1.1o3|1e2.1o2|1e3.1o3|1e4.1o1|i	FALSE	FALSE	TRUE	5	5	1	chr21	-	ENSG00000205581.11:t:39345146-39345274_39345274-39347247	39347114	39347292	39345274	39347247			1973	chr21:39345274-39347247	chr21:39347114-39347292	178	1	target	annotated	FALSE
HMGN1	ENSG00000205581.11	ENSG00000205581.11:t:39345146-39345274	0.127668854248313	0.74479406084243	7.98580700428531e-06	0.281	0.423	t|1e1.1o3|1e2.1o2|1e3.1o3|1e4.1o1|i	FALSE	FALSE	TRUE	5	5	1	chr21	-	ENSG00000205581.11:t:39345146-39345274_39345274-39345830	39347336	39347483	39345274	39345830			556	chr21:39345274-39345830	chr21:39347336-39347483	147	0	target	annotated	FALSE
HMGN1	ENSG00000205581.11	ENSG00000205581.11:t:39345146-39345274	0.00902365459421477	4.72724285351154e-06	0.387444136051302	0.135	0.149	t|1e1.1o3|1e2.1o2|1e3.1o3|1e4.1o1|i	FALSE	FALSE	TRUE	5	5	1	chr21	-	ENSG00000205581.11:t:39345146-39345274_39345275-39345829	39347995	39348339	39345275	39345829			554	chr21:39345275-39345829	chr21:39347995-39348339	344	2	target	none	FALSE
ZBED1	ENSG00000214717.12_PAR_Y	ENSG00000214717.12_PAR_Y:t:2489905-2490772	-0.00120102297292127	0.0909301619531976	2.37782734121561e-05	0.409	0.401	t|1e1.1o1|1e2.1o1|2e3.1o1|2e4.1o1	FALSE	TRUE	TRUE	4	5	1	chrY	-	ENSG00000214717.12_PAR_Y:t:2489905-2490772_2490772-2500817	2489905	2490772	2490772	2500817			10045	chrY:2490772-2500817	chrY:2489905-2490772	867	0	target	annotated	FALSE
ZBED1	ENSG00000214717.12_PAR_Y	ENSG00000214717.12_PAR_Y:t:2489905-2490772	0.248703285842525	0.940127814813203	9.40777409092492e-07	0.165	0.454	t|1e1.1o1|1e2.1o1|2e3.1o1|2e4.1o1	FALSE	TRUE	TRUE	4	5	1	chrY	-	ENSG00000214717.12_PAR_Y:t:2489905-2490772_2490772-2500311	2500311	2500555	2490772	2500311			9539	chrY:2490772-2500311	chrY:2500311-2500555	244	1	target	annotated	FALSE
ZBED1	ENSG00000214717.12_PAR_Y	ENSG00000214717.12_PAR_Y:t:2489905-2490772	-0.162784782921299	0.84088871088016	1.16627893420596e-06	0.228	0.043	t|1e1.1o1|1e2.1o1|2e3.1o1|2e4.1o1	FALSE	TRUE	TRUE	4	5	1	chrY	-	ENSG00000214717.12_PAR_Y:t:2489905-2490772_2490769-2500817	2500817	2500976	2490769	2500817			10048	chrY:2490769-2500817	chrY:2500817-2500976	159	0	target	annotated	FALSE
ZBED1	ENSG00000214717.12_PAR_Y	ENSG00000214717.12_PAR_Y:t:2489905-2490772	-0.0587315892201294	0.247105725418267	9.9788598461048e-06	0.198	0.101	t|1e1.1o1|1e2.1o1|2e3.1o1|2e4.1o1	FALSE	TRUE	TRUE	4	5	0	chrY	-	ENSG00000214717.12_PAR_Y:t:2489905-2490772_2490769-2500311			2490769	2500311			9542	chrY:2490769-2500311	chrY:NA-NA			target	ambig_gene	FALSE
FAM228B	ENSG00000219626.9	ENSG00000219626.9:s:24095141-24097468	0.104261241487126	0.506824660164496	4.59781153482948e-06	0.074	0.211	s|1e1.1o1|1e2.1o1	FALSE	FALSE	TRUE	2	3	0	chr2	+	ENSG00000219626.9:s:24095141-24097468_24095229-24117041	24095141	24097468	24095229	24117041			21812	chr2:24095229-24117041	chr2:24095141-24097468	2327	2	source	novel_acceptor	FALSE
FAM228B	ENSG00000219626.9	ENSG00000219626.9:s:24095141-24097468	-0.10426126192845	0.506825038639154	4.59806771724303e-06	0.926	0.789	s|1e1.1o1|1e2.1o1	FALSE	FALSE	TRUE	2	3	1	chr2	+	ENSG00000219626.9:s:24095141-24097468_24095229-24135119	24117041		24095229	24135119			39890	chr2:24095229-24135119	chr2:24117041-nan			source	annotated	FALSE
FAM228B	ENSG00000219626.9	ENSG00000219626.9:s:24123469-24123533	0.0118962729960579	0.099605386199437	0.000237460721368654	0.403	0.435	s|1e1.2o3|1e2.1o1|i	FALSE	FALSE	TRUE	3	3	1	chr2	+	ENSG00000219626.9:s:24123469-24123533_24123533-24124330	24123469	24123533	24123533	24124330	24123534	24124162	797	chr2:24123533-24124330	chr2:24123469-24123533	64	1	source	annotated	FALSE
FAM228B	ENSG00000219626.9	ENSG00000219626.9:s:24123469-24123533	-0.102647920406223	0.516887169214379	4.4119170028889e-05	0.198	0.06	s|1e1.2o3|1e2.1o1|i	FALSE	FALSE	TRUE	3	3	0	chr2	+	ENSG00000219626.9:s:24123469-24123533_24123533-24135119	24124163	24124460	24123533	24135119			11586	chr2:24123533-24135119	chr2:24124163-24124460	297	0	source	ambig_gene	FALSE
FAM228B	ENSG00000219626.9	ENSG00000219626.9:s:24123469-24123533	0.0467820207941742	0.222024433348874	0.000123121881386905	0.399	0.505	s|1e1.2o3|1e2.1o1|i	FALSE	FALSE	TRUE	3	3	0	chr2	+	ENSG00000219626.9:s:24123469-24123533_24123534-24124162	24135119	24135187	24123534	24124162			628	chr2:24123534-24124162	chr2:24135119-24135187	68	2	source	none	FALSE
FAM228B	ENSG00000219626.9	ENSG00000219626.9:s:24135119-24135187	-0.111172067424954	0.58862198970908	2.81312827821179e-06	0.166	0.038	s|1e1.1o1|1e2.1o1|1e3.1o2	FALSE	FALSE	TRUE	3	4	1	chr2	+	ENSG00000219626.9:s:24135119-24135187_24135187-24137909	24135119	24135187	24135187	24137909			2722	chr2:24135187-24137909	chr2:24135119-24135187	68	2	source	annotated	FALSE
FAM228B	ENSG00000219626.9	ENSG00000219626.9:s:24135119-24135187	-0.0316692974006197	0.115804643100681	1.91070952436645e-05	0.278	0.219	s|1e1.1o1|1e2.1o1|1e3.1o2	FALSE	FALSE	TRUE	3	4	1	chr2	+	ENSG00000219626.9:s:24135119-24135187_24135187-24139370	24137909	24138100	24135187	24139370			4183	chr2:24135187-24139370	chr2:24137909-24138100	191	2	source	annotated	FALSE
FAM228B	ENSG00000219626.9	ENSG00000219626.9:s:24135119-24135187	0.151876307797373	0.731767001931833	2.52313804265504e-06	0.557	0.742	s|1e1.1o1|1e2.1o1|1e3.1o2	FALSE	FALSE	TRUE	3	4	1	chr2	+	ENSG00000219626.9:s:24135119-24135187_24135187-24164198	24139370	24139450	24135187	24164198			29011	chr2:24135187-24164198	chr2:24139370-24139450	80	2	source	annotated	FALSE
WASH7P	ENSG00000227232.5	ENSG00000227232.5:s:16607-16765	-0.128864703524946	0.670992441918516	2.53913256941241e-05	0.279	0.126	s|1e1.1o1|i	FALSE	FALSE	FALSE	2	2	1	chr1	-	ENSG00000227232.5:s:16607-16765_15947-16607	15796	15947	15947	16607	15948	16606	660	chr1:15947-16607	chr1:15796-15947	151	1	source	annotated	FALSE
WASH7P	ENSG00000227232.5	ENSG00000227232.5:s:16607-16765	0.128864641140237	0.670991965220845	2.53893477462001e-05	0.721	0.874	s|1e1.1o1|i	FALSE	FALSE	FALSE	2	2	0	chr1	-	ENSG00000227232.5:s:16607-16765_15948-16606	16607	16765	15948	16606			658	chr1:15948-16606	chr1:16607-16765	158	2	source	none	FALSE
AL732372.2	ENSG00000237094.12	ENSG00000237094.12:s:502465-502661	-0.12593115831022	0.591698242686943	4.23611223043796e-06	0.401	0.217	s|1e1.1o1|1e2.1o2	FALSE	FALSE	TRUE	2	3	1	chr1	-	ENSG00000237094.12:s:502465-502661_502243-502465	501556	501620	502243	502465			222	chr1:502243-502465	chr1:501556-501620	64	1	source	annotated	FALSE
AL732372.2	ENSG00000237094.12	ENSG00000237094.12:s:502465-502661	0.125931140603099	0.591698112361767	4.23591180459581e-06	0.599	0.783	s|1e1.1o1|1e2.1o2	FALSE	FALSE	TRUE	2	3	1	chr1	-	ENSG00000237094.12:s:502465-502661_501620-502465	502187	502243	501620	502465			845	chr1:501620-502465	chr1:502187-502243	56	2	source	annotated	FALSE
AL732372.2	ENSG00000237094.12	ENSG00000237094.12:s:517156-517266	-0.283845969978639	0.979100604665084	4.74253567750438e-07	0.369	0.061	s|1e1.1o2|2e1.1o2	TRUE	FALSE	FALSE	2	2	1	chr1	-	ENSG00000237094.12:s:517156-517266_514423-517185	514359	514423	514423	517185			2762	chr1:514423-517185	chr1:514359-514423	64	1	source	annotated	FALSE
AL732372.2	ENSG00000237094.12	ENSG00000237094.12:s:517156-517266	0.283845937458107	0.979100631063987	4.74233048070543e-07	0.631	0.939	s|1e1.1o2|2e1.1o2	TRUE	FALSE	FALSE	2	2	1	chr1	-	ENSG00000237094.12:s:517156-517266_514423-517156	517156	517266	514423	517156			2733	chr1:514423-517156	chr1:517156-517266	110	2	source	annotated	FALSE
SNHG6	ENSG00000245910.8	ENSG00000245910.8:s:66922614-66922725	-0.118053333844896	0.667139389606897	1.54154808095219e-05	0.624	0.509	s|1e1.1o1|1e2.2o2|i	FALSE	FALSE	TRUE	3	3	1	chr8	-	ENSG00000245910.8:s:66922614-66922725_66922392-66922614	66921684	66922116	66922392	66922614	66922393	66922613	222	chr8:66922392-66922614	chr8:66921684-66922116	432	0	source	annotated	FALSE
SNHG6	ENSG00000245910.8	ENSG00000245910.8:s:66922614-66922725	0.117739933920512	0.655311307612863	1.16951985018193e-05	0.204	0.33	s|1e1.1o1|1e2.2o2|i	FALSE	FALSE	TRUE	3	3	1	chr8	-	ENSG00000245910.8:s:66922614-66922725_66922114-66922614	66922271	66922392	66922114	66922614			500	chr8:66922114-66922614	chr8:66922271-66922392	121	1	source	annotated	FALSE
SNHG6	ENSG00000245910.8	ENSG00000245910.8:s:66922614-66922725	-0.0019067239311911	0.00346968417318309	0.00261280553741672	0.159	0.155	s|1e1.1o1|1e2.2o2|i	FALSE	FALSE	TRUE	3	3	1	chr8	-	ENSG00000245910.8:s:66922614-66922725_66922393-66922613	66922614	66922725	66922393	66922613			220	chr8:66922393-66922613	chr8:66922614-66922725	111	0	source	none	FALSE
SNHG6	ENSG00000245910.8	ENSG00000245910.8:t:66921684-66922116	0.132700786707523	0.774634534451838	3.84473216579512e-06	0.222	0.352	t|1e1.1o1|1e2.1o3|i	FALSE	FALSE	TRUE	3	3	1	chr8	-	ENSG00000245910.8:t:66921684-66922116_66922114-66922614	66921684	66922116	66922114	66922614	66922117	66922270	500	chr8:66922114-66922614	chr8:66921684-66922116	432	0	target	annotated	FALSE
SNHG6	ENSG00000245910.8	ENSG00000245910.8:t:66921684-66922116	-0.148072189066848	0.819171809120137	8.72959609832247e-06	0.534	0.382	t|1e1.1o1|1e2.1o3|i	FALSE	FALSE	TRUE	3	3	1	chr8	-	ENSG00000245910.8:t:66921684-66922116_66922114-66922324	66922271	66922392	66922114	66922324			210	chr8:66922114-66922324	chr8:66922271-66922392	121	1	target	annotated	FALSE
SNHG6	ENSG00000245910.8	ENSG00000245910.8:t:66921684-66922116	0.0138659954492245	0.0191011607222264	0.00103073043276745	0.24	0.268	t|1e1.1o1|1e2.1o3|i	FALSE	FALSE	TRUE	3	3	0	chr8	-	ENSG00000245910.8:t:66921684-66922116_66922117-66922270	66922614	66922725	66922117	66922270			153	chr8:66922117-66922270	chr8:66922614-66922725	111	0	target	none	FALSE
SHANK3	ENSG00000251322.8	ENSG00000251322.8:s:50705496-50706152	0.103006943910487	0.525787181131631	2.58210208342703e-06	0.828	0.943	s|1e1.1o1|1e2.1o1	FALSE	FALSE	TRUE	2	3	1	chr22	+	ENSG00000251322.8:s:50705496-50706152_50706152-50711615	50705496	50706152	50706152	50711615			5463	chr22:50706152-50711615	chr22:50705496-50706152	656	2	source	annotated	FALSE
SHANK3	ENSG00000251322.8	ENSG00000251322.8:s:50705496-50706152	-0.103006941464223	0.525787205275911	2.58226366600667e-06	0.172	0.057	s|1e1.1o1|1e2.1o1	FALSE	FALSE	TRUE	2	3	0	chr22	+	ENSG00000251322.8:s:50705496-50706152_50706152-50714917	50711615	50711638	50706152	50714917			8765	chr22:50706152-50714917	chr22:50711615-50711638	23	2	source	novel_exon_skip	FALSE
SHANK3	ENSG00000251322.8	ENSG00000251322.8:s:50720184-50722437	-0.122846831262556	0.654379529825159	2.55141735171494e-05	0.402	0.258	s|1e1.1o2|i	FALSE	FALSE	FALSE	2	2	1	chr22	+	ENSG00000251322.8:s:50720184-50722437_50722437-50730721	50720184	50722437	50722437	50730721	50722438	50724126	8284	chr22:50722437-50730721	chr22:50720184-50722437	2253	0	source	annotated	FALSE
SHANK3	ENSG00000251322.8	ENSG00000251322.8:s:50720184-50722437	0.122846833705054	0.654379400639716	2.55121152330156e-05	0.598	0.742	s|1e1.1o2|i	FALSE	FALSE	FALSE	2	2	0	chr22	+	ENSG00000251322.8:s:50720184-50722437_50722438-50724126	50730721	50733298	50722438	50724126			1688	chr22:50722438-50724126	chr22:50730721-50733298	2577	0	source	none	FALSE
SHANK3	ENSG00000251322.8	ENSG00000251322.8:t:50714917-50715047	-0.234767059575001	0.965050670071242	2.77080119648332e-06	0.439	0.181	t|1e1.1o1|1e2.1o1|i	FALSE	FALSE	TRUE	3	3	0	chr22	+	ENSG00000251322.8:t:50714917-50715047_50706152-50714917	50705496	50706152	50706152	50714917	50711639	50714916	8765	chr22:50706152-50714917	chr22:50705496-50706152	656	2	target	novel_exon_skip	FALSE
SHANK3	ENSG00000251322.8	ENSG00000251322.8:t:50714917-50715047	0.222235483041079	0.940484470636292	4.8663192136042e-06	0.514	0.763	t|1e1.1o1|1e2.1o1|i	FALSE	FALSE	TRUE	3	3	1	chr22	+	ENSG00000251322.8:t:50714917-50715047_50711638-50714917	50711615	50711638	50711638	50714917			3279	chr22:50711638-50714917	chr22:50711615-50711638	23	2	target	annotated	FALSE
SHANK3	ENSG00000251322.8	ENSG00000251322.8:t:50714917-50715047	0.00379930012126246	0.00515651772203009	0.0024356440675309	0.048	0.055	t|1e1.1o1|1e2.1o1|i	FALSE	FALSE	TRUE	3	3	0	chr22	+	ENSG00000251322.8:t:50714917-50715047_50711639-50714916	50714917	50715047	50711639	50714916			3277	chr22:50711639-50714916	chr22:50714917-50715047	130	1	target	none	FALSE
AL117348.2	ENSG00000255835.1	ENSG00000255835.1:s:225922204-225922383	0.0371682316289476	0.0583372727129909	0.000501450201552051	0.068	0.125	s|1e1.1o1|1e2.1o1|i	FALSE	FALSE	TRUE	3	3	0	chr1	-	ENSG00000255835.1:s:225922204-225922383_225922076-225922204		225922076	225922076	225922204	225921645	225922203	128	chr1:225922076-225922204	chr1:nan-225922076			source	ambig_gene	FALSE
AL117348.2	ENSG00000255835.1	ENSG00000255835.1:s:225922204-225922383	0.0736448338667886	0.314052727090698	8.7211880153613e-05	0.151	0.244	s|1e1.1o1|1e2.1o1|i	FALSE	FALSE	TRUE	3	3	1	chr1	-	ENSG00000255835.1:s:225922204-225922383_225921644-225922204	225921552	225921644	225921644	225922204			560	chr1:225921644-225922204	chr1:225921552-225921644	92	2	source	annotated	FALSE
AL117348.2	ENSG00000255835.1	ENSG00000255835.1:s:225922204-225922383	-0.137630542669171	0.744041602689324	1.65701831809084e-05	0.781	0.631	s|1e1.1o1|1e2.1o1|i	FALSE	FALSE	TRUE	3	3	0	chr1	-	ENSG00000255835.1:s:225922204-225922383_225921645-225922203	225922204	225922383	225921645	225922203			558	chr1:225921645-225922203	chr1:225922204-225922383	179	2	source	none	FALSE
TVP23C-CDRT4	ENSG00000259024.6	ENSG00000259024.6:s:15545785-15545916	0.108063483320947	0.533940776248134	4.29383338131529e-06	0.688	0.835	s|1e1.1o1|1e2.1o1	FALSE	FALSE	TRUE	2	3	1	chr17	-	ENSG00000259024.6:s:15545785-15545916_15540561-15545785	15440208	15440285	15540561	15545785			5224	chr17:15540561-15545785	chr17:15440208-15440285	77	2	source	annotated	FALSE
TVP23C-CDRT4	ENSG00000259024.6	ENSG00000259024.6:s:15545785-15545916	-0.10806353232046	0.533941181357849	4.29406071900118e-06	0.312	0.165	s|1e1.1o1|1e2.1o1	FALSE	FALSE	TRUE	2	3	1	chr17	-	ENSG00000259024.6:s:15545785-15545916_15440285-15545785	15540433	15540561	15440285	15545785			105500	chr17:15440285-15545785	chr17:15540433-15540561	128	2	source	annotated	FALSE
AC139769.2	ENSG00000267924.1	ENSG00000267924.1:t:23865038-23865177	-0.154115338241394	0.797291675596364	1.5100325385653e-06	0.256	0.086	t|1e1.1o1|1e2.1o1	FALSE	FALSE	TRUE	2	3	0	chr19	-	ENSG00000267924.1:t:23865038-23865177_23865177-23870706	23865038	23865177	23865177	23870706			5529	chr19:23865177-23870706	chr19:23865038-23865177	139	1	target	none	FALSE
AC139769.2	ENSG00000267924.1	ENSG00000267924.1:t:23865038-23865177	0.154115293624346	0.797291432015653	1.50995655024815e-06	0.744	0.914	t|1e1.1o1|1e2.1o1	FALSE	FALSE	TRUE	2	3	0	chr19	-	ENSG00000267924.1:t:23865038-23865177_23865177-23868755	23868755		23865177	23868755			3578	chr19:23865177-23868755	chr19:23868755-nan			target	none	FALSE
SYNRG	ENSG00000275066.5	ENSG00000275066.5:s:37520538-37520648	-0.204306061132144	0.920606569700769	7.96332629948715e-07	0.503	0.277	s|1e1.1o1|1e2.1o1	FALSE	FALSE	TRUE	2	3	1	chr17	-	ENSG00000275066.5:s:37520538-37520648_37520214-37520538	37517830	37519071	37520214	37520538			324	chr17:37520214-37520538	chr17:37517830-37519071	1241	2	source	annotated	FALSE
SYNRG	ENSG00000275066.5	ENSG00000275066.5:s:37520538-37520648	0.204306049941354	0.920606528570328	7.9629622712157e-07	0.497	0.723	s|1e1.1o1|1e2.1o1	FALSE	FALSE	TRUE	2	3	1	chr17	-	ENSG00000275066.5:s:37520538-37520648_37519071-37520538	37520179	37520214	37519071	37520538			1467	chr17:37519071-37520538	chr17:37520179-37520214	35	2	source	annotated	FALSE
SYNRG	ENSG00000275066.5	ENSG00000275066.5:t:37517830-37519071	0.221883584949481	0.972018782602059	2.31657709166703e-07	0.336	0.576	t|1e1.1o1|1e2.1o1	FALSE	FALSE	TRUE	2	3	1	chr17	-	ENSG00000275066.5:t:37517830-37519071_37519071-37520538	37517830	37519071	37519071	37520538			1467	chr17:37519071-37520538	chr17:37517830-37519071	1241	2	target	annotated	FALSE
SYNRG	ENSG00000275066.5	ENSG00000275066.5:t:37517830-37519071	-0.221883581933121	0.972018771636274	2.31667780847822e-07	0.664	0.424	t|1e1.1o1|1e2.1o1	FALSE	FALSE	TRUE	2	3	1	chr17	-	ENSG00000275066.5:t:37517830-37519071_37519071-37520179	37520179	37520214	37519071	37520179			1108	chr17:37519071-37520179	chr17:37520179-37520214	35	2	target	annotated	FALSE
AC090114.3	ENSG00000280828.1	ENSG00000280828.1:s:128578890-128578933	0.146141615605815	0.661893799496911	3.64392327143869e-06	0.284	0.49	s|1e1.1o1|1e2.1o1	FALSE	FALSE	TRUE	2	3	1	chr7	+	ENSG00000280828.1:s:128578890-128578933_128578933-128579999	128578890	128578933	128578933	128579999			1066	chr7:128578933-128579999	chr7:128578890-128578933	43	1	source	annotated	FALSE
AC090114.3	ENSG00000280828.1	ENSG00000280828.1:s:128578890-128578933	-0.146141639267591	0.66189402563536	3.64409459552295e-06	0.716	0.51	s|1e1.1o1|1e2.1o1	FALSE	FALSE	TRUE	2	3	0	chr7	+	ENSG00000280828.1:s:128578890-128578933_128578933-128591850	128579999	128580094	128578933	128591850			12917	chr7:128578933-128591850	chr7:128579999-128580094	95	2	source	ambig_gene	FALSE
LUC7L	ENSG00000007392.16	ENSG00000007392.16:s:229279-229463	0.0803865053586237	0.334915619863379	7.24901121711197e-05	0.245	0.336	s|1e1.1o1|1e2.4o4|i	FALSE	FALSE	TRUE	3	3	1	chr16	-	ENSG00000007392.16:s:229279-229463_228402-229279	227242	227686	228402	229279	229143	229278	877	chr16:228402-229279	chr16:227242-227686	444	0	source	annotated	FALSE
LUC7L	ENSG00000007392.16	ENSG00000007392.16:s:229279-229463	-0.113326662728758	0.620780055595241	2.46176089505612e-05	0.622	0.505	s|1e1.1o1|1e2.4o4|i	FALSE	FALSE	TRUE	3	3	1	chr16	-	ENSG00000007392.16:s:229279-229463_227336-229279	227987	228402	227336	229279			1943	chr16:227336-229279	chr16:227987-228402	415	1	source	annotated	FALSE
LUC7L	ENSG00000007392.16	ENSG00000007392.16:s:229279-229463	0.0187588263549313	0.00469460361355147	0.00403860389651774	0.132	0.159	s|1e1.1o1|1e2.4o4|i	FALSE	FALSE	TRUE	3	3	0	chr16	-	ENSG00000007392.16:s:229279-229463_229143-229278	229279	229463	229143	229278			135	chr16:229143-229278	chr16:229279-229463	184	1	source	none	FALSE
SEMA3B	ENSG00000012171.19	ENSG00000012171.19:s:50271088-50271181	-0.166831972629374	0.878867117579837	6.0047607897129e-07	0.211	0.013	s|1e1.1o1|2e1.1o1	TRUE	FALSE	FALSE	2	2	1	chr3	+	ENSG00000012171.19:s:50271088-50271181_50271177-50271361	50271088	50271181	50271177	50271361			184	chr3:50271177-50271361	chr3:50271088-50271181	93	0	source	annotated	FALSE
SEMA3B	ENSG00000012171.19	ENSG00000012171.19:s:50271088-50271181	0.166832027010816	0.878867293357243	6.00445466813554e-07	0.789	0.987	s|1e1.1o1|2e1.1o1	TRUE	FALSE	FALSE	2	2	1	chr3	+	ENSG00000012171.19:s:50271088-50271181_50271181-50271361	50271361	50271480	50271181	50271361			180	chr3:50271181-50271361	chr3:50271361-50271480	119	2	source	annotated	FALSE
YAF2	ENSG00000015153.14	ENSG00000015153.14:t:42210548-42210836	-0.135508790448253	0.69252971761221	2.53098765512494e-06	0.355	0.186	t|1e1.1o1|2e1.1o1|2e2.2o3	FALSE	TRUE	TRUE	3	3	1	chr12	-	ENSG00000015153.14:t:42210548-42210836_42210680-42237599	42210548	42210836	42210680	42237599			26919	chr12:42210680-42237599	chr12:42210548-42210836	288	0	target	annotated	FALSE
YAF2	ENSG00000015153.14	ENSG00000015153.14:t:42210548-42210836	0.156569031719577	0.787857572362934	1.74891692059134e-06	0.615	0.802	t|1e1.1o1|2e1.1o1|2e2.2o3	FALSE	TRUE	TRUE	3	3	1	chr12	-	ENSG00000015153.14:t:42210548-42210836_42210619-42237599	42231224	42235997	42210619	42237599			26980	chr12:42210619-42237599	chr12:42231224-42235997	4773	0	target	annotated	FALSE
YAF2	ENSG00000015153.14	ENSG00000015153.14:t:42210548-42210836	-0.00216750870467864	5.08859022009859e-05	0.00368278124843802	0.03	0.012	t|1e1.1o1|2e1.1o1|2e2.2o3	FALSE	TRUE	TRUE	3	3	1	chr12	-	ENSG00000015153.14:t:42210548-42210836_42210619-42235614	42237599	42237800	42210619	42235614			24995	chr12:42210619-42235614	chr12:42237599-42237800	201	0	target	annotated	FALSE
SPDL1	ENSG00000040275.17	ENSG00000040275.17:s:169601280-169602021	-0.191709894621418	0.814590867714316	1.73116964801157e-05	0.747	0.503	s|1e1.1o1|i	FALSE	FALSE	FALSE	2	2	1	chr5	+	ENSG00000040275.17:s:169601280-169602021_169601625-169604060	169601280	169602021	169601625	169604060	169602022	169604059	2435	chr5:169601625-169604060	chr5:169601280-169602021	741	0	source	annotated	FALSE
SPDL1	ENSG00000040275.17	ENSG00000040275.17:s:169601280-169602021	0.191709873789459	0.81459067686899	1.73104254202546e-05	0.253	0.497	s|1e1.1o1|i	FALSE	FALSE	FALSE	2	2	0	chr5	+	ENSG00000040275.17:s:169601280-169602021_169602022-169604059	169604060	169604778	169602022	169604059			2037	chr5:169602022-169604059	chr5:169604060-169604778	718	1	source	none	FALSE
PFKP	ENSG00000067057.17	ENSG00000067057.17:s:3099275-3099352	0.30924987375875	0.999999960636936	2.20066293744583e-17	0.004	0.336	s|1e1.1o1|1e2.1o1	FALSE	FALSE	TRUE	2	3	0	chr10	+	ENSG00000067057.17:s:3099275-3099352_3099352-3099557	3099275	3099352	3099352	3099557			205	chr10:3099352-3099557	chr10:3099275-3099352	77	2	source	novel_acceptor	TRUE
PFKP	ENSG00000067057.17	ENSG00000067057.17:s:3099275-3099352	-0.309249917803954	0.9999999721873	0	0.996	0.664	s|1e1.1o1|1e2.1o1	FALSE	FALSE	TRUE	2	3	1	chr10	+	ENSG00000067057.17:s:3099275-3099352_3099352-3101365	3099557	3099819	3099352	3101365			2013	chr10:3099352-3101365	chr10:3099557-3099819	262	1	source	annotated	FALSE
PFKP	ENSG00000067057.17	ENSG00000067057.17:t:3101365-3101554	-0.300850349188776	0.999999631224019	0	0.999	0.672	t|1e1.1o1|1e2.1o1	FALSE	FALSE	TRUE	2	3	1	chr10	+	ENSG00000067057.17:t:3101365-3101554_3099352-3101365	3099275	3099352	3099352	3101365			2013	chr10:3099352-3101365	chr10:3099275-3099352	77	2	target	annotated	FALSE
PFKP	ENSG00000067057.17	ENSG00000067057.17:t:3101365-3101554	0.300850346394773	0.999999634175429	6.48016903210611e-16	0.001	0.328	t|1e1.1o1|1e2.1o1	FALSE	FALSE	TRUE	2	3	0	chr10	+	ENSG00000067057.17:t:3101365-3101554_3099819-3101365	3099557	3099819	3099819	3101365			1546	chr10:3099819-3101365	chr10:3099557-3099819	262	1	target	novel_donor	TRUE
PFKP	ENSG00000067057.17	ENSG00000067057.17:t:3129007-3129983	-0.0600146948334178	0.10167494567615	3.11068689246019e-05	0.095	0.018	t|1e1.1o1|1e2.1o1|1e3.1o1	FALSE	FALSE	TRUE	3	4	0	chr10	+	ENSG00000067057.17:t:3129007-3129983_3118869-3129819	3118782	3118869	3118869	3129819			10950	chr10:3118869-3129819	chr10:3118782-3118869	87	0	target	novel_exon_skip	FALSE
PFKP	ENSG00000067057.17	ENSG00000067057.17:t:3129007-3129983	-0.251705056212074	0.994221805851432	4.30102718995684e-08	0.61	0.349	t|1e1.1o1|1e2.1o1|1e3.1o1	FALSE	FALSE	TRUE	3	4	1	chr10	+	ENSG00000067057.17:t:3129007-3129983_3120044-3129819	3119892	3120044	3120044	3129819			9775	chr10:3120044-3129819	chr10:3119892-3120044	152	2	target	annotated	FALSE
PFKP	ENSG00000067057.17	ENSG00000067057.17:t:3129007-3129983	0.336580854733499	0.999971016040581	2.88663779943042e-10	0.293	0.632	t|1e1.1o1|1e2.1o1|1e3.1o1	FALSE	FALSE	TRUE	3	4	1	chr10	+	ENSG00000067057.17:t:3129007-3129983_3125249-3129819	3125097	3125249	3125249	3129819			4570	chr10:3125249-3129819	chr10:3125097-3125249	152	2	target	annotated	FALSE
FBXW11	ENSG00000072803.17	ENSG00000072803.17:t:171914343-171914405	0.143200781645908	0.768894315401405	1.52599785064239e-06	0.363	0.522	t|1e1.1o1|1e2.1o1|1e3.1o1	FALSE	FALSE	TRUE	3	4	1	chr5	-	ENSG00000072803.17:t:171914343-171914405_171914405-172006458	171914343	171914405	171914405	172006458			92053	chr5:171914405-172006458	chr5:171914343-171914405	62	2	target	annotated	FALSE
FBXW11	ENSG00000072803.17	ENSG00000072803.17:t:171914343-171914405	-0.042685029812838	0.106316910084271	2.01330974681779e-05	0.215	0.153	t|1e1.1o1|1e2.1o1|1e3.1o1	FALSE	FALSE	TRUE	3	4	1	chr5	-	ENSG00000072803.17:t:171914343-171914405_171914405-171996890	171957597	171957698	171914405	171996890			82485	chr5:171914405-171996890	chr5:171957597-171957698	101	2	target	annotated	FALSE
FBXW11	ENSG00000072803.17	ENSG00000072803.17:t:171914343-171914405	-0.0709658716864889	0.29677037875694	8.1145494160717e-06	0.423	0.323	t|1e1.1o1|1e2.1o1|1e3.1o1	FALSE	FALSE	TRUE	3	4	1	chr5	-	ENSG00000072803.17:t:171914343-171914405_171914405-171957597	171996890	171997051	171914405	171957597			43192	chr5:171914405-171957597	chr5:171996890-171997051	161	2	target	annotated	FALSE
TULP3	ENSG00000078246.17	ENSG00000078246.17:s:2909529-2909580	-0.383394956731351	0.998695229265301	1.17456556925077e-07	0.867	0.474	s|1e1.1o1|1e2.1o1	FALSE	FALSE	TRUE	2	3	1	chr12	+	ENSG00000078246.17:s:2909529-2909580_2909580-2920763	2909529	2909580	2909580	2920763			11183	chr12:2909580-2920763	chr12:2909529-2909580	51	0	source	annotated	FALSE
TULP3	ENSG00000078246.17	ENSG00000078246.17:s:2909529-2909580	0.383394943290521	0.998695205724769	1.17455160153557e-07	0.133	0.526	s|1e1.1o1|1e2.1o1	FALSE	FALSE	TRUE	2	3	1	chr12	+	ENSG00000078246.17:s:2909529-2909580_2909580-2922262	2920763	2920922	2909580	2922262			12682	chr12:2909580-2922262	chr12:2920763-2920922	159	0	source	annotated	FALSE
TULP3	ENSG00000078246.17	ENSG00000078246.17:t:2922262-2922402	0.338312055982899	0.999300974333083	2.48407389036183e-08	0.092	0.437	t|1e1.1o1|1e2.1o1	FALSE	FALSE	TRUE	2	3	1	chr12	+	ENSG00000078246.17:t:2922262-2922402_2909580-2922262	2909529	2909580	2909580	2922262			12682	chr12:2909580-2922262	chr12:2909529-2909580	51	0	target	annotated	FALSE
TULP3	ENSG00000078246.17	ENSG00000078246.17:t:2922262-2922402	-0.338312119298961	0.999300961909662	2.48413377645917e-08	0.908	0.563	t|1e1.1o1|1e2.1o1	FALSE	FALSE	TRUE	2	3	1	chr12	+	ENSG00000078246.17:t:2922262-2922402_2920922-2922262	2920763	2920922	2920922	2922262			1340	chr12:2920922-2922262	chr12:2920763-2920922	159	0	target	annotated	FALSE
MAP3K4	ENSG00000085511.20	ENSG00000085511.20:s:161093773-161093851	-0.157109656447362	0.778428048345698	1.68305032348659e-05	0.586	0.395	s|1e1.2o3|2e1.2o3|i	TRUE	FALSE	FALSE	3	2	1	chr6	+	ENSG00000085511.20:s:161093773-161093851_161093839-161097080	161093773	161093851	161093839	161097080	161093852	161096696	3241	chr6:161093839-161097080	chr6:161093773-161093851	78	0	source	annotated	FALSE
MAP3K4	ENSG00000085511.20	ENSG00000085511.20:s:161093773-161093851	0.100805557108449	0.497851211370311	4.80009846678355e-05	0.299	0.44	s|1e1.2o3|2e1.2o3|i	TRUE	FALSE	FALSE	3	2	1	chr6	+	ENSG00000085511.20:s:161093773-161093851_161093851-161097080	161096697	161097176	161093851	161097080			3229	chr6:161093851-161097080	chr6:161096697-161097176	479	2	source	annotated	FALSE
MAP3K4	ENSG00000085511.20	ENSG00000085511.20:s:161093773-161093851	0.0243482566962157	0.0575273149208721	0.000360482713789937	0.116	0.162	s|1e1.2o3|2e1.2o3|i	TRUE	FALSE	FALSE	3	2	0	chr6	+	ENSG00000085511.20:s:161093773-161093851_161093852-161096696			161093852	161096696			2844	chr6:161093852-161096696	chr6:NA-NA			source	none	FALSE
C20orf194	ENSG00000088854.12	ENSG00000088854.12:s:3348525-3348623	0.426251408098934	0.999999999992827	2.43392881365842e-21	0.001	0.444	s|1e1.1o1|1e2.1o1	FALSE	FALSE	TRUE	2	3	0	chr20	-	ENSG00000088854.12:s:3348525-3348623_3344699-3348525		3344699	3344699	3348525			3826	chr20:3344699-3348525	chr20:nan-3344699			source	novel_acceptor	TRUE
C20orf194	ENSG00000088854.12	ENSG00000088854.12:s:3348525-3348623	-0.426251452922419	1	0	0.999	0.556	s|1e1.1o1|1e2.1o1	FALSE	FALSE	TRUE	2	3	1	chr20	-	ENSG00000088854.12:s:3348525-3348623_3343731-3348525	3343676	3343731	3343731	3348525			4794	chr20:3343731-3348525	chr20:3343676-3343731	55	1	source	annotated	FALSE
UPRT	ENSG00000094841.14	ENSG00000094841.14:t:75293472-75293514	-0.121243460815226	0.627273597004307	2.9845869371492e-06	0.584	0.443	t|1e1.1o1|1e2.1o1|1e3.1o1	FALSE	FALSE	TRUE	3	4	1	chrX	+	ENSG00000094841.14:t:75293472-75293514_75274640-75293472	75274085	75274640	75274640	75293472			18832	chrX:75274640-75293472	chrX:75274085-75274640	555	0	target	annotated	FALSE
UPRT	ENSG00000094841.14	ENSG00000094841.14:t:75293472-75293514	0.108491219338667	0.547929732715812	3.84003756141061e-06	0.354	0.483	t|1e1.1o1|1e2.1o1|1e3.1o1	FALSE	FALSE	TRUE	3	4	1	chrX	+	ENSG00000094841.14:t:75293472-75293514_75274758-75293472	75274728	75274758	75274758	75293472			18714	chrX:75274758-75293472	chrX:75274728-75274758	30	0	target	annotated	FALSE
UPRT	ENSG00000094841.14	ENSG00000094841.14:t:75293472-75293514	0.00424097255410408	0.00188596990156138	0.000328126482365826	0.062	0.074	t|1e1.1o1|1e2.1o1|1e3.1o1	FALSE	FALSE	TRUE	3	4	1	chrX	+	ENSG00000094841.14:t:75293472-75293514_75285524-75293472	75285434	75285524	75285524	75293472			7948	chrX:75285524-75293472	chrX:75285434-75285524	90	0	target	annotated	FALSE
ARHGEF7	ENSG00000102606.18	ENSG00000102606.18:t:111280538-111281109	0.0528644987042371	0.0195822470509669	0.00254167356339514	0.026	0.083	t|1e1.1o1|1e2.1o2|1e2.2o2|i	TRUE	FALSE	TRUE	4	3	1	chr13	+	ENSG00000102606.18:t:111280538-111281109_111277673-111280538	111277587	111277673	111277673	111280538	111280441	111280537	2865	chr13:111277673-111280538	chr13:111277587-111277673	86	2	target	annotated	FALSE
ARHGEF7	ENSG00000102606.18	ENSG00000102606.18:t:111280538-111281109	0.0542477405321699	0.243678160526934	0.0001023397216249	0.714	0.773	t|1e1.1o1|1e2.1o2|1e2.2o2|i	TRUE	FALSE	TRUE	4	3	1	chr13	+	ENSG00000102606.18:t:111280538-111281109_111280350-111280538	111280272	111280440	111280350	111280538			188	chr13:111280350-111280538	chr13:111280272-111280440	168	0	target	annotated	FALSE
ARHGEF7	ENSG00000102606.18	ENSG00000102606.18:t:111280538-111281109	4.91337263325427e-08	7.29952006131584e-21	0.490563183917498	0.009	0.017	t|1e1.1o1|1e2.1o2|1e2.2o2|i	TRUE	FALSE	TRUE	4	3	0	chr13	+	ENSG00000102606.18:t:111280538-111281109_111280440-111280538	111280538	111281109	111280440	111280538			98	chr13:111280440-111280538	chr13:111280538-111281109	571	1	target	novel_donor	FALSE
ARHGEF7	ENSG00000102606.18	ENSG00000102606.18:t:111280538-111281109	-0.121358943043336	0.624484909177729	3.11665246055526e-05	0.25	0.131	t|1e1.1o1|1e2.1o2|1e2.2o2|i	TRUE	FALSE	TRUE	4	3	0	chr13	+	ENSG00000102606.18:t:111280538-111281109_111280441-111280537			111280441	111280537			96	chr13:111280441-111280537	chr13:NA-NA			target	none	FALSE
EARS2	ENSG00000103356.15	ENSG00000103356.15:s:23557205-23557731	0.114686841258318	0.608984109455874	2.21304274227549e-06	0.017	0.154	s|1e1.1o1|1e2.1o1	FALSE	FALSE	TRUE	2	3	1	chr16	-	ENSG00000103356.15:s:23557205-23557731_23553123-23557205	23552149	23552304	23553123	23557205			4082	chr16:23553123-23557205	chr16:23552149-23552304	155	2	source	annotated	FALSE
EARS2	ENSG00000103356.15	ENSG00000103356.15:s:23557205-23557731	-0.114686881509449	0.608984642538125	2.21316825632645e-06	0.983	0.846	s|1e1.1o1|1e2.1o1	FALSE	FALSE	TRUE	2	3	1	chr16	-	ENSG00000103356.15:s:23557205-23557731_23552304-23557205	23553007	23553123	23552304	23557205			4901	chr16:23552304-23557205	chr16:23553007-23553123	116	2	source	annotated	FALSE
URI1	ENSG00000105176.18	ENSG00000105176.18:t:29985223-29985301	0.134111250130694	0.723438752070031	1.78639171863192e-06	0.303	0.456	t|1e1.1o1|1e2.1o1	FALSE	FALSE	TRUE	2	3	1	chr19	+	ENSG00000105176.18:t:29985223-29985301_29942664-29985223	29942239	29942664	29942664	29985223			42559	chr19:29942664-29985223	chr19:29942239-29942664	425	2	target	annotated	FALSE
URI1	ENSG00000105176.18	ENSG00000105176.18:t:29985223-29985301	-0.134111294105862	0.723439028170634	1.78648787418911e-06	0.697	0.544	t|1e1.1o1|1e2.1o1	FALSE	FALSE	TRUE	2	3	1	chr19	+	ENSG00000105176.18:t:29985223-29985301_29971227-29985223	29971093	29971227	29971227	29985223			13996	chr19:29971227-29985223	chr19:29971093-29971227	134	2	target	annotated	FALSE
CRTC1	ENSG00000105662.16	ENSG00000105662.16:t:18771442-18771546	-0.300040399309145	0.999999624099928	1.08468789505878e-13	0.866	0.568	t|1e1.1o1|1e2.1o1|i	FALSE	FALSE	TRUE	3	3	1	chr19	+	ENSG00000105662.16:t:18771442-18771546_18768793-18771442	18768485	18768793	18768793	18771442	18771325	18771441	2649	chr19:18768793-18771442	chr19:18768485-18768793	308	2	target	annotated	FALSE
CRTC1	ENSG00000105662.16	ENSG00000105662.16:t:18771442-18771546	0.0538005423651888	0.0322866920448631	0.00150022290055557	0.001	0.084	t|1e1.1o1|1e2.1o1|i	FALSE	FALSE	TRUE	3	3	0	chr19	+	ENSG00000105662.16:t:18771442-18771546_18771325-18771442	18771279	18771325	18771325	18771442			117	chr19:18771325-18771442	chr19:18771279-18771325	46	1	target	novel_donor	FALSE
CRTC1	ENSG00000105662.16	ENSG00000105662.16:t:18771442-18771546	0.212843657118372	0.995996523564335	1.27675270983132e-08	0.133	0.349	t|1e1.1o1|1e2.1o1|i	FALSE	FALSE	TRUE	3	3	0	chr19	+	ENSG00000105662.16:t:18771442-18771546_18771325-18771441	18771442	18771546	18771325	18771441			116	chr19:18771325-18771441	chr19:18771442-18771546	104	2	target	none	FALSE
CCNJ	ENSG00000107443.16	ENSG00000107443.16:s:96056701-96057000	0.102227298847894	0.5054763184196	4.54872512264297e-06	0.709	0.841	s|1e1.1o3|1e1.2o3|1e1.3o3	FALSE	TRUE	FALSE	3	2	1	chr10	+	ENSG00000107443.16:s:96056701-96057000_96057000-96057088	96056701	96057000	96057000	96057088			88	chr10:96057000-96057088	chr10:96056701-96057000	299	2	source	annotated	FALSE
CCNJ	ENSG00000107443.16	ENSG00000107443.16:s:96056701-96057000	-0.0355242347019419	0.0171718541950575	0.000150396445076972	0.073	0.026	s|1e1.1o3|1e1.2o3|1e1.3o3	FALSE	TRUE	FALSE	3	2	1	chr10	+	ENSG00000107443.16:s:96056701-96057000_96057000-96057121	96057088	96057247	96057000	96057121			121	chr10:96057000-96057121	chr10:96057088-96057247	159	0	source	annotated	FALSE
CCNJ	ENSG00000107443.16	ENSG00000107443.16:s:96056701-96057000	-0.0557913767335498	0.21395119762416	1.11359854548798e-05	0.217	0.134	s|1e1.1o3|1e1.2o3|1e1.3o3	FALSE	TRUE	FALSE	3	2	1	chr10	+	ENSG00000107443.16:s:96056701-96057000_96057000-96057124			96057000	96057124			124	chr10:96057000-96057124	chr10:NA-NA			source	annotated	FALSE
CCNJ	ENSG00000107443.16	ENSG00000107443.16:t:96056701-96057000	0.128593539489384	0.705685086147362	1.79765295028404e-06	0.038	0.178	t|1e1.1o1|1e2.1o1	FALSE	FALSE	TRUE	2	3	0	chr10	+	ENSG00000107443.16:t:96056701-96057000_96044462-96056701	96044353	96044462	96044462	96056701			12239	chr10:96044462-96056701	chr10:96044353-96044462	109	1	target	novel_exon_skip	TRUE
CCNJ	ENSG00000107443.16	ENSG00000107443.16:t:96056701-96057000	-0.128593584100878	0.705685606116593	1.797748617971e-06	0.962	0.822	t|1e1.1o1|1e2.1o1	FALSE	FALSE	TRUE	2	3	1	chr10	+	ENSG00000107443.16:t:96056701-96057000_96050466-96056701	96050256	96050466	96050466	96056701			6235	chr10:96050466-96056701	chr10:96050256-96050466	210	0	target	annotated	FALSE
WSB1	ENSG00000109046.15	ENSG00000109046.15:t:27309100-27309272	-0.0522118809074055	0.148214482135942	0.000202784819084534	0.191	0.121	t|1e1.2o2|1e2.6o7|i	FALSE	FALSE	TRUE	3	3	1	chr17	+	ENSG00000109046.15:t:27309100-27309272_27306882-27309100	27306782	27306882	27306882	27309100	27308848	27309099	2218	chr17:27306882-27309100	chr17:27306782-27306882	100	1	target	annotated	FALSE
WSB1	ENSG00000109046.15	ENSG00000109046.15:t:27309100-27309272	-0.0588145294344208	0.0985770783102594	0.000419225116738309	0.09	0.027	t|1e1.2o2|1e2.6o7|i	FALSE	FALSE	TRUE	3	3	0	chr17	+	ENSG00000109046.15:t:27309100-27309272_27308748-27309100	27307744	27308847	27308748	27309100			352	chr17:27308748-27309100	chr17:27307744-27308847	1103	2	target	novel_donor	FALSE
WSB1	ENSG00000109046.15	ENSG00000109046.15:t:27309100-27309272	0.125756870785533	0.691984078166279	1.76452016587008e-05	0.719	0.851	t|1e1.2o2|1e2.6o7|i	FALSE	FALSE	TRUE	3	3	0	chr17	+	ENSG00000109046.15:t:27309100-27309272_27308848-27309099	27309100	27309272	27308848	27309099			251	chr17:27308848-27309099	chr17:27309100-27309272	172	1	target	none	FALSE
C2CD5	ENSG00000111731.12	ENSG00000111731.12:s:22523426-22523624	-0.108616406336989	0.5589983202975	3.48512249770394e-06	0.65	0.525	s|1e1.1o1|1e2.1o1	FALSE	FALSE	TRUE	2	3	1	chr12	-	ENSG00000111731.12:s:22523426-22523624_22519239-22523426	22517986	22518137	22519239	22523426			4187	chr12:22519239-22523426	chr12:22517986-22518137	151	1	source	annotated	FALSE
C2CD5	ENSG00000111731.12	ENSG00000111731.12:s:22523426-22523624	0.108616386080565	0.558998027396749	3.48492590107394e-06	0.35	0.475	s|1e1.1o1|1e2.1o1	FALSE	FALSE	TRUE	2	3	1	chr12	-	ENSG00000111731.12:s:22523426-22523624_22518137-22523426	22519040	22519239	22518137	22523426			5289	chr12:22518137-22523426	chr12:22519040-22519239	199	1	source	annotated	FALSE
C2CD5	ENSG00000111731.12	ENSG00000111731.12:t:22513294-22513379	-0.114639116958603	0.615106915131595	3.16181432488127e-05	0.409	0.287	t|1e1.1o2|1e1.2o2|1e2.2o2|1e3.1o1|i	TRUE	FALSE	TRUE	5	4	1	chr12	-	ENSG00000111731.12:t:22513294-22513379_22513379-22519115	22513294	22513379	22513379	22519115	22513380	22514958	5736	chr12:22513379-22519115	chr12:22513294-22513379	85	1	target	annotated	FALSE
C2CD5	ENSG00000111731.12	ENSG00000111731.12:t:22513294-22513379	0.000153345153171552	7.34163420351237e-21	0.475005036667289	0.022	0.031	t|1e1.1o2|1e1.2o2|1e2.2o2|1e3.1o1|i	TRUE	FALSE	TRUE	5	4	0	chr12	-	ENSG00000111731.12:t:22513294-22513379_22513379-22519040	22514959	22515150	22513379	22519040			5661	chr12:22513379-22519040	chr12:22514959-22515150	191	2	target	novel_combo	FALSE
C2CD5	ENSG00000111731.12	ENSG00000111731.12:t:22513294-22513379	0.0359767835873908	0.110265241858418	0.000237530978894897	0.534	0.583	t|1e1.1o2|1e1.2o2|1e2.2o2|1e3.1o1|i	TRUE	FALSE	TRUE	5	4	1	chr12	-	ENSG00000111731.12:t:22513294-22513379_22513379-22517986	22517986	22518137	22513379	22517986			4607	chr12:22513379-22517986	chr12:22517986-22518137	151	1	target	annotated	FALSE
C2CD5	ENSG00000111731.12	ENSG00000111731.12:t:22513294-22513379	7.33690193074002e-05	7.64119469488439e-21	0.475000632384905	0.036	0.035	t|1e1.1o2|1e1.2o2|1e2.2o2|1e3.1o1|i	TRUE	FALSE	TRUE	5	4	0	chr12	-	ENSG00000111731.12:t:22513294-22513379_22513379-22514959	22519040	22519239	22513379	22514959			1580	chr12:22513379-22514959	chr12:22519040-22519239	199	1	target	novel_donor	FALSE
C2CD5	ENSG00000111731.12	ENSG00000111731.12:t:22513294-22513379	0.0351407679087208	0.0349014326580204	0.000833167968216427	0	0.063	t|1e1.1o2|1e1.2o2|1e2.2o2|1e3.1o1|i	TRUE	FALSE	TRUE	5	4	0	chr12	-	ENSG00000111731.12:t:22513294-22513379_22513380-22514958			22513380	22514958			1578	chr12:22513380-22514958	chr12:NA-NA			target	none	FALSE
PIKFYVE	ENSG00000115020.17	ENSG00000115020.17:s:208273584-208273733	-0.0362445473780546	0.0569488702665429	3.67976067938702e-05	0.094	0.042	s|1e1.1o2|1e1.2o2|1e2.1o1|1e3.1o1	FALSE	TRUE	TRUE	4	4	1	chr2	+	ENSG00000115020.17:s:208273584-208273733_208273733-208274018	208273584	208273733	208273733	208274018			285	chr2:208273733-208274018	chr2:208273584-208273733	149	2	source	annotated	FALSE
PIKFYVE	ENSG00000115020.17	ENSG00000115020.17:s:208273584-208273733	-0.00568568290757568	0.000218793118621236	0.00276826807756647	0.042	0.025	s|1e1.1o2|1e1.2o2|1e2.1o1|1e3.1o1	FALSE	TRUE	TRUE	4	4	1	chr2	+	ENSG00000115020.17:s:208273584-208273733_208273733-208274021	208274018	208274053	208273733	208274021			288	chr2:208273733-208274021	chr2:208274018-208274053	35	2	source	annotated	FALSE
PIKFYVE	ENSG00000115020.17	ENSG00000115020.17:s:208273584-208273733	-0.0354122562054625	0.121826200881062	1.84393388757975e-05	0.729	0.662	s|1e1.1o2|1e1.2o2|1e2.1o1|1e3.1o1	FALSE	TRUE	TRUE	4	4	1	chr2	+	ENSG00000115020.17:s:208273584-208273733_208273733-208276712	208276712	208276830	208273733	208276712			2979	chr2:208273733-208276712	chr2:208276712-208276830	118	1	source	annotated	FALSE
PIKFYVE	ENSG00000115020.17	ENSG00000115020.17:s:208273584-208273733	0.107636647490204	0.540818471787214	3.9066338561776e-06	0.135	0.268	s|1e1.1o2|1e1.2o2|1e2.1o1|1e3.1o1	FALSE	TRUE	TRUE	4	4	1	chr2	+	ENSG00000115020.17:s:208273584-208273733_208273733-208285726	208285726	208285933	208273733	208285726			11993	chr2:208273733-208285726	chr2:208285726-208285933	207	0	source	annotated	FALSE
GGCX	ENSG00000115486.12	ENSG00000115486.12:t:85551812-85551981	0.123357883501631	0.551534485953867	5.16147433265394e-06	0.387	0.577	t|1e1.1o2|1e2.2o2	FALSE	FALSE	TRUE	2	3	0	chr2	-	ENSG00000115486.12:t:85551812-85551981_85551981-85552939	85551812	85551981	85551981	85552939			958	chr2:85551981-85552939	chr2:85551812-85551981	169	1	target	novel_exon_skip	FALSE
GGCX	ENSG00000115486.12	ENSG00000115486.12:t:85551812-85551981	-0.123357879751152	0.55153461493025	5.16170602182786e-06	0.613	0.423	t|1e1.1o2|1e2.2o2	FALSE	FALSE	TRUE	2	3	1	chr2	-	ENSG00000115486.12:t:85551812-85551981_85551981-85552416	85552416	85552567	85551981	85552416			435	chr2:85551981-85552416	chr2:85552416-85552567	151	1	target	annotated	FALSE
DOCK7	ENSG00000116641.17	ENSG00000116641.17:s:62488934-62489065	-0.0819935030867215	0.386312728248456	6.87456020331823e-05	0.795	0.658	s|1e1.2o2|1e2.1o3|i	FALSE	FALSE	TRUE	3	3	1	chr1	-	ENSG00000116641.17:s:62488934-62489065_62487412-62488934	62477700	62477834	62487412	62488934	62487453	62488933	1522	chr1:62487412-62488934	chr1:62477700-62477834	134	2	source	annotated	FALSE
DOCK7	ENSG00000116641.17	ENSG00000116641.17:s:62488934-62489065	-0.00357081871514471	0.000711958155955605	0.00863635683982134	0.04	0.022	s|1e1.2o2|1e2.1o3|i	FALSE	FALSE	TRUE	3	3	1	chr1	-	ENSG00000116641.17:s:62488934-62489065_62477834-62488934	62487398	62487452	62477834	62488934			11100	chr1:62477834-62488934	chr1:62487398-62487452	54	0	source	annotated	FALSE
DOCK7	ENSG00000116641.17	ENSG00000116641.17:s:62488934-62489065	0.104749855433534	0.507654568452859	4.76064553486271e-05	0.165	0.32	s|1e1.2o2|1e2.1o3|i	FALSE	FALSE	TRUE	3	3	0	chr1	-	ENSG00000116641.17:s:62488934-62489065_62487453-62488933	62488934	62489065	62487453	62488933			1480	chr1:62487453-62488933	chr1:62488934-62489065	131	2	source	none	FALSE
NENF	ENSG00000117691.10	ENSG00000117691.10:t:212444339-212444442	0.124919082084758	0.652229204717474	2.54243629604642e-06	0.064	0.214	t|1e1.1o1|1e2.1o1	FALSE	FALSE	TRUE	2	3	1	chr1	+	ENSG00000117691.10:t:212444339-212444442_212433120-212444339	212432920	212433120	212433120	212444339			11219	chr1:212433120-212444339	chr1:212432920-212433120	200	2	target	annotated	FALSE
NENF	ENSG00000117691.10	ENSG00000117691.10:t:212444339-212444442	-0.124919108447691	0.652229529893454	2.54257565246441e-06	0.936	0.786	t|1e1.1o1|1e2.1o1	FALSE	FALSE	TRUE	2	3	1	chr1	+	ENSG00000117691.10:t:212444339-212444442_212442625-212444339	212442546	212442625	212442625	212444339			1714	chr1:212442625-212444339	chr1:212442546-212442625	79	1	target	annotated	FALSE
PROX2	ENSG00000119608.12	ENSG00000119608.12:s:74856801-74856995	-0.111974492369792	0.573071132048933	3.67533003192699e-05	0.289	0.145	s|1e1.1o1|i	FALSE	FALSE	FALSE	2	2	1	chr14	-	ENSG00000119608.12:s:74856801-74856995_74855302-74856801	74852871	74855302	74855302	74856801	74855303	74856800	1499	chr14:74855302-74856801	chr14:74852871-74855302	2431	1	source	annotated	FALSE
PROX2	ENSG00000119608.12	ENSG00000119608.12:s:74856801-74856995	0.111974431850685	0.573070569451766	3.67504434620183e-05	0.711	0.855	s|1e1.1o1|i	FALSE	FALSE	FALSE	2	2	0	chr14	-	ENSG00000119608.12:s:74856801-74856995_74855303-74856800	74856801	74856995	74855303	74856800			1497	chr14:74855303-74856800	chr14:74856801-74856995	194	2	source	none	FALSE
RNF170	ENSG00000120925.16	ENSG00000120925.16:t:42861330-42861855	0.120114142901205	0.635743888146295	2.6999977586097e-06	0.19	0.324	t|1e1.1o1|1e2.2o2	FALSE	FALSE	TRUE	2	3	1	chr8	-	ENSG00000120925.16:t:42861330-42861855_42861855-42870004	42861330	42861855	42861855	42870004			8149	chr8:42861855-42870004	chr8:42861330-42861855	525	0	target	annotated	FALSE
RNF170	ENSG00000120925.16	ENSG00000120925.16:t:42861330-42861855	-0.120114179939145	0.635744087277108	2.7001490345846e-06	0.81	0.676	t|1e1.1o1|1e2.2o2	FALSE	FALSE	TRUE	2	3	1	chr8	-	ENSG00000120925.16:t:42861330-42861855_42861855-42865416	42865416	42865489	42861855	42865416			3561	chr8:42861855-42865416	chr8:42865416-42865489	73	1	target	annotated	FALSE
ODF2L	ENSG00000122417.15	ENSG00000122417.15:s:86352859-86352984	0.123532320284073	0.610352827263462	3.57244355348796e-06	0.33	0.489	s|1e1.1o1|1e2.1o1	FALSE	FALSE	TRUE	2	3	1	chr1	-	ENSG00000122417.15:s:86352859-86352984_86352208-86352859	86346824	86348878	86352208	86352859			651	chr1:86352208-86352859	chr1:86346824-86348878	2054	2	source	annotated	FALSE
ODF2L	ENSG00000122417.15	ENSG00000122417.15:s:86352859-86352984	-0.12353232711693	0.610353030599096	3.57262953210036e-06	0.67	0.511	s|1e1.1o1|1e2.1o1	FALSE	FALSE	TRUE	2	3	1	chr1	-	ENSG00000122417.15:s:86352859-86352984_86348878-86352859	86350094	86352208	86348878	86352859			3981	chr1:86348878-86352859	chr1:86350094-86352208	2114	2	source	annotated	FALSE
ODF2L	ENSG00000122417.15	ENSG00000122417.15:t:86385728-86387086	-0.102504301429335	0.525700687581323	3.00520222951128e-06	0.965	0.85	t|1e1.1o1|1e2.1o1|2e3.1o1	FALSE	TRUE	TRUE	3	4	1	chr1	-	ENSG00000122417.15:t:86385728-86387086_86387086-86396033	86385728	86387086	86387086	86396033			8947	chr1:86387086-86396033	chr1:86385728-86387086	1358	2	target	annotated	FALSE
ODF2L	ENSG00000122417.15	ENSG00000122417.15:t:86385728-86387086	0.0873157924772194	0.392229028353422	4.52392380561797e-06	0.025	0.128	t|1e1.1o1|1e2.1o1|2e3.1o1	FALSE	TRUE	TRUE	3	4	1	chr1	-	ENSG00000122417.15:t:86385728-86387086_86387086-86395945	86395945	86395977	86387086	86395945			8859	chr1:86387086-86395945	chr1:86395945-86395977	32	2	target	annotated	FALSE
ODF2L	ENSG00000122417.15	ENSG00000122417.15:t:86385728-86387086	0.00055847054055904	4.97651405837988e-06	0.0100403296076056	0.01	0.022	t|1e1.1o1|1e2.1o1|2e3.1o1	FALSE	TRUE	TRUE	3	4	1	chr1	-	ENSG00000122417.15:t:86385728-86387086_86387079-86396033	86396033	86396342	86387079	86396033			8954	chr1:86387079-86396033	chr1:86396033-86396342	309	0	target	annotated	FALSE
ATP8A1	ENSG00000124406.16	ENSG00000124406.16:t:42588260-42588617	0.0137209460586719	3.43611574527014e-07	0.469594504865838	0.036	0.05	t|1e1.1o1|1e2.1o1|1e3.1o1|i	FALSE	FALSE	TRUE	4	4	1	chr4	-	ENSG00000124406.16:t:42588260-42588617_42588329-42600478	42588260	42588617	42588329	42600478	42588618	42590810	12149	chr4:42588329-42600478	chr4:42588260-42588617	357	0	target	annotated	FALSE
ATP8A1	ENSG00000124406.16	ENSG00000124406.16:t:42588260-42588617	-0.115502546150357	0.627079702076721	2.5944945840406e-05	0.593	0.463	t|1e1.1o1|1e2.1o1|1e3.1o1|i	FALSE	FALSE	TRUE	4	4	1	chr4	-	ENSG00000124406.16:t:42588260-42588617_42588329-42594289	42590811	42590884	42588329	42594289			5960	chr4:42588329-42594289	chr4:42590811-42590884	73	1	target	annotated	FALSE
ATP8A1	ENSG00000124406.16	ENSG00000124406.16:t:42588260-42588617	0.0507498061346612	0.157714268363297	0.000161377999078581	0.341	0.41	t|1e1.1o1|1e2.1o1|1e3.1o1|i	FALSE	FALSE	TRUE	4	4	1	chr4	-	ENSG00000124406.16:t:42588260-42588617_42588329-42590811	42594289	42594362	42588329	42590811			2482	chr4:42588329-42590811	chr4:42594289-42594362	73	1	target	annotated	FALSE
ATP8A1	ENSG00000124406.16	ENSG00000124406.16:t:42588260-42588617	0.0515189461729416	0.0146739812249732	0.00335640838639791	0.032	0.078	t|1e1.1o1|1e2.1o1|1e3.1o1|i	FALSE	FALSE	TRUE	4	4	0	chr4	-	ENSG00000124406.16:t:42588260-42588617_42588618-42590810	42600478	42600518	42588618	42590810			2192	chr4:42588618-42590810	chr4:42600478-42600518	40	1	target	none	FALSE
GGA3	ENSG00000125447.17	ENSG00000125447.17:t:75236599-75237796	0.0457898976899688	0.0685648937839291	0.00052403391388959	0.016	0.084	t|1e1.1o1|2e2.1o1|3e3.1o1|i	FALSE	TRUE	TRUE	4	4	1	chr17	-	ENSG00000125447.17:t:75236599-75237796_75237796-75238652	75236599	75237796	75237796	75238652	75237797	75237981	856	chr17:75237796-75238652	chr17:75236599-75237796	1197	0	target	annotated	FALSE
GGA3	ENSG00000125447.17	ENSG00000125447.17:t:75236599-75237796	0.00346782756725915	0.000318210623291486	0.0107418475461912	0.002	0.035	t|1e1.1o1|2e2.1o1|3e3.1o1|i	FALSE	TRUE	TRUE	4	4	1	chr17	-	ENSG00000125447.17:t:75236599-75237796_75237777-75237982	75237982	75238090	75237777	75237982			205	chr17:75237777-75237982	chr17:75237982-75238090	108	0	target	annotated	FALSE
GGA3	ENSG00000125447.17	ENSG00000125447.17:t:75236599-75237796	0.00137892224313232	7.17149310120296e-05	0.01945210956749	0.009	0.027	t|1e1.1o1|2e2.1o1|3e3.1o1|i	FALSE	TRUE	TRUE	4	4	1	chr17	-	ENSG00000125447.17:t:75236599-75237796_75237532-75238652	75238652	75238762	75237532	75238652			1120	chr17:75237532-75238652	chr17:75238652-75238762	110	2	target	annotated	FALSE
GGA3	ENSG00000125447.17	ENSG00000125447.17:t:75236599-75237796	-0.106288467390532	0.55510623206542	2.94422031446029e-05	0.973	0.855	t|1e1.1o1|2e2.1o1|3e3.1o1|i	FALSE	TRUE	TRUE	4	4	1	chr17	-	ENSG00000125447.17:t:75236599-75237796_75237797-75237981			75237797	75237981			184	chr17:75237797-75237981	chr17:NA-NA			target	none	FALSE
GGA3	ENSG00000125447.17	ENSG00000125447.17:t:75246712-75246796	0.125381382939873	0.686362605276777	2.18571956860086e-06	0.732	0.868	t|1e1.1o1|1e2.1o1	FALSE	FALSE	TRUE	2	3	1	chr17	-	ENSG00000125447.17:t:75246712-75246796_75246796-75261548	75246712	75246796	75246796	75261548			14752	chr17:75246796-75261548	chr17:75246712-75246796	84	0	target	annotated	FALSE
GGA3	ENSG00000125447.17	ENSG00000125447.17:t:75246712-75246796	-0.12538143563401	0.686362999906092	2.18583740141387e-06	0.268	0.132	t|1e1.1o1|1e2.1o1	FALSE	FALSE	TRUE	2	3	1	chr17	-	ENSG00000125447.17:t:75246712-75246796_75246796-75248840	75248840	75249008	75246796	75248840			2044	chr17:75246796-75248840	chr17:75248840-75249008	168	0	target	annotated	FALSE
NSRP1	ENSG00000126653.18	ENSG00000126653.18:s:30118038-30118173	0.0471587561762763	0.0899920523868596	2.82700864018443e-05	0.035	0.094	s|1e1.1o1|1e2.1o1|1e3.1o1	FALSE	FALSE	TRUE	3	4	1	chr17	+	ENSG00000126653.18:s:30118038-30118173_30118173-30156540	30118038	30118173	30118173	30156540			38367	chr17:30118173-30156540	chr17:30118038-30118173	135	0	source	annotated	FALSE
NSRP1	ENSG00000126653.18	ENSG00000126653.18:s:30118038-30118173	0.0466049788608289	0.117625965850432	2.05252367936727e-05	0.057	0.123	s|1e1.1o1|1e2.1o1|1e3.1o1	FALSE	FALSE	TRUE	3	4	0	chr17	+	ENSG00000126653.18:s:30118038-30118173_30118173-30163067	30156540	30156662	30118173	30163067			44894	chr17:30118173-30163067	chr17:30156540-30156662	122	2	source	novel_exon_skip	FALSE
NSRP1	ENSG00000126653.18	ENSG00000126653.18:s:30118038-30118173	-0.109431171731953	0.559358793892027	3.56491830943995e-06	0.909	0.783	s|1e1.1o1|1e2.1o1|1e3.1o1	FALSE	FALSE	TRUE	3	4	1	chr17	+	ENSG00000126653.18:s:30118038-30118173_30118173-30172542	30163067	30163162	30118173	30172542			54369	chr17:30118173-30172542	chr17:30163067-30163162	95	2	source	annotated	FALSE
PEX1	ENSG00000127980.16	ENSG00000127980.16:s:92510865-92511047	0.132908826828754	0.643033099595074	3.39684330999933e-06	0.673	0.851	s|1e1.1o1|1e2.2o2	FALSE	FALSE	TRUE	2	3	1	chr7	-	ENSG00000127980.16:s:92510865-92511047_92509411-92510944	92506994	92507823	92509411	92510944			1533	chr7:92509411-92510944	chr7:92506994-92507823	829	1	source	annotated	FALSE
PEX1	ENSG00000127980.16	ENSG00000127980.16:s:92510865-92511047	-0.132908834970133	0.643033413637771	3.39701177476393e-06	0.327	0.149	s|1e1.1o1|1e2.2o2	FALSE	FALSE	TRUE	2	3	1	chr7	-	ENSG00000127980.16:s:92510865-92511047_92507126-92510944	92509329	92509411	92507126	92510944			3818	chr7:92507126-92510944	chr7:92509329-92509411	82	1	source	annotated	FALSE
TTI2	ENSG00000129696.12	ENSG00000129696.12:s:33509746-33509932	-0.1142354857485	0.574912518654623	3.65068861896134e-06	0.834	0.691	s|1e1.1o1|1e2.1o1	FALSE	FALSE	TRUE	2	3	1	chr8	-	ENSG00000129696.12:s:33509746-33509932_33507321-33509746	33503748	33503935	33507321	33509746			2425	chr8:33507321-33509746	chr8:33503748-33503935	187	1	source	annotated	FALSE
TTI2	ENSG00000129696.12	ENSG00000129696.12:s:33509746-33509932	0.114235477072743	0.574912357799516	3.65048599821997e-06	0.166	0.309	s|1e1.1o1|1e2.1o1	FALSE	FALSE	TRUE	2	3	1	chr8	-	ENSG00000129696.12:s:33509746-33509932_33503935-33509746	33507229	33507321	33503935	33509746			5811	chr8:33503935-33509746	chr8:33507229-33507321	92	2	source	annotated	FALSE
TTI2	ENSG00000129696.12	ENSG00000129696.12:t:33503748-33503935	0.101362390169722	0.489393255674708	5.00196014995312e-06	0.205	0.346	t|1e1.1o1|1e2.1o1	FALSE	FALSE	TRUE	2	3	1	chr8	-	ENSG00000129696.12:t:33503748-33503935_33503935-33509746	33503748	33503935	33503935	33509746			5811	chr8:33503935-33509746	chr8:33503748-33503935	187	1	target	annotated	FALSE
TTI2	ENSG00000129696.12	ENSG00000129696.12:t:33503748-33503935	-0.101362405495566	0.489393586282683	5.00222884414203e-06	0.795	0.654	t|1e1.1o1|1e2.1o1	FALSE	FALSE	TRUE	2	3	1	chr8	-	ENSG00000129696.12:t:33503748-33503935_33503935-33507229	33507229	33507321	33503935	33507229			3294	chr8:33503935-33507229	chr8:33507229-33507321	92	2	target	annotated	FALSE
UNC13A	ENSG00000130477.15	ENSG00000130477.15:s:17629240-17629323	-0.0114357712455238	0.00136927695080433	0.0115530597862792	0.112	0.093	s|1e1.2o2|2e1.2o2|i	TRUE	FALSE	FALSE	3	2	0	chr19	-	ENSG00000130477.15:s:17629240-17629323_17627940-17629243	17627863	17628337	17627940	17629243	17628338	17629239	1303	chr19:17627940-17629243	chr19:17627863-17628337	474	0	source	novel_donor	FALSE
UNC13A	ENSG00000130477.15	ENSG00000130477.15:s:17629240-17629323	-0.333729554315706	0.999998497378126	9.46742684249102e-12	0.791	0.461	s|1e1.2o2|2e1.2o2|i	TRUE	FALSE	FALSE	3	2	1	chr19	-	ENSG00000130477.15:s:17629240-17629323_17627940-17629240	17629240	17629323	17627940	17629240			1300	chr19:17627940-17629240	chr19:17629240-17629323	83	2	source	annotated	FALSE
UNC13A	ENSG00000130477.15	ENSG00000130477.15:s:17629240-17629323	0.354320809980534	0.999999996306408	1.8219788862776e-15	0.097	0.444	s|1e1.2o2|2e1.2o2|i	TRUE	FALSE	FALSE	3	2	0	chr19	-	ENSG00000130477.15:s:17629240-17629323_17628338-17629239			17628338	17629239			901	chr19:17628338-17629239	chr19:NA-NA			source	none	FALSE
UNC13A	ENSG00000130477.15	ENSG00000130477.15:s:17642845-17642960	0.0794713215511078	0.299364945056385	6.92696249326554e-06	0.001	0.115	s|1e1.1o2|1e1.2o2|1e2.1o1	FALSE	TRUE	TRUE	3	3	0	chr19	-	ENSG00000130477.15:s:17642845-17642960_17642591-17642845	17641393	17641556	17642591	17642845			254	chr19:17642591-17642845	chr19:17641393-17641556	163	1	source	novel_acceptor	FALSE
UNC13A	ENSG00000130477.15	ENSG00000130477.15:s:17642845-17642960	0.463217552992262	1	2.3100047084684e-19	0.001	0.476	s|1e1.1o2|1e1.2o2|1e2.1o1	FALSE	TRUE	TRUE	3	3	0	chr19	-	ENSG00000130477.15:s:17642845-17642960_17642541-17642845	17642414	17642591	17642541	17642845			304	chr19:17642541-17642845	chr19:17642414-17642591	177	0	source	novel_acceptor	TRUE
UNC13A	ENSG00000130477.15	ENSG00000130477.15:s:17642845-17642960	-0.580477685742026	1	4.79616346638068e-14	0.998	0.409	s|1e1.1o2|1e1.2o2|1e2.1o1	FALSE	TRUE	TRUE	3	3	1	chr19	-	ENSG00000130477.15:s:17642845-17642960_17641556-17642845	17642845	17642960	17641556	17642845			1289	chr19:17641556-17642845	chr19:17642845-17642960	115	1	source	annotated	FALSE
UNC13A	ENSG00000130477.15	ENSG00000130477.15:t:17641393-17641556	-0.586831423590179	1	1.50324197534246e-13	0.998	0.401	t|1e1.1o1|1e2.1o1|i	FALSE	FALSE	TRUE	3	3	1	chr19	-	ENSG00000130477.15:t:17641393-17641556_17641556-17642845	17641393	17641556	17641556	17642845	17641557	17642413	1289	chr19:17641556-17642845	chr19:17641393-17641556	163	1	target	annotated	FALSE
UNC13A	ENSG00000130477.15	ENSG00000130477.15:t:17641393-17641556	0.43718624823749	1	2.22611985603875e-19	0.001	0.449	t|1e1.1o1|1e2.1o1|i	FALSE	FALSE	TRUE	3	3	0	chr19	-	ENSG00000130477.15:t:17641393-17641556_17641556-17642414	17642414	17642591	17641556	17642414			858	chr19:17641556-17642414	chr19:17642414-17642591	177	0	target	novel_donor	TRUE
UNC13A	ENSG00000130477.15	ENSG00000130477.15:t:17641393-17641556	0.116417443401064	0.647365450897314	1.34077032344379e-05	0.001	0.142	t|1e1.1o1|1e2.1o1|i	FALSE	FALSE	TRUE	3	3	0	chr19	-	ENSG00000130477.15:t:17641393-17641556_17641557-17642413	17642845	17642960	17641557	17642413			856	chr19:17641557-17642413	chr19:17642845-17642960	115	1	target	none	TRUE
IGHMBP2	ENSG00000132740.8	ENSG00000132740.8:t:68932305-68933481	0.139618956902524	0.709389539784317	2.25868907536752e-05	0.605	0.772	t|1e1.1o1|1e2.1o1|i	FALSE	FALSE	TRUE	3	3	1	chr11	+	ENSG00000132740.8:t:68932305-68933481_68929357-68933299	68929183	68929357	68929357	68933299	68930435	68932304	3942	chr11:68929357-68933299	chr11:68929183-68929357	174	0	target	annotated	FALSE
IGHMBP2	ENSG00000132740.8	ENSG00000132740.8:t:68932305-68933481	-0.12829315873438	0.684296043402921	2.25601288134092e-05	0.249	0.104	t|1e1.1o1|1e2.1o1|i	FALSE	FALSE	TRUE	3	3	1	chr11	+	ENSG00000132740.8:t:68932305-68933481_68930434-68933299	68930091	68930434	68930434	68933299			2865	chr11:68930434-68933299	chr11:68930091-68930434	343	1	target	annotated	FALSE
IGHMBP2	ENSG00000132740.8	ENSG00000132740.8:t:68932305-68933481	-0.00936062999805383	0.0207179646006761	0.000749086824548995	0.143	0.121	t|1e1.1o1|1e2.1o1|i	FALSE	FALSE	TRUE	3	3	0	chr11	+	ENSG00000132740.8:t:68932305-68933481_68930435-68932304	68932305	68933481	68930435	68932304			1869	chr11:68930435-68932304	chr11:68932305-68933481	1176	0	target	none	FALSE
DGLUCY	ENSG00000133943.20	ENSG00000133943.20:s:91114063-91114283	0.148721804358965	0.722407166498476	2.5557753421989e-06	0.145	0.333	s|1e1.1o1|1e2.1o2	FALSE	FALSE	TRUE	2	3	1	chr14	+	ENSG00000133943.20:s:91114063-91114283_91114283-91145221	91114063	91114283	91114283	91145221			30938	chr14:91114283-91145221	chr14:91114063-91114283	220	1	source	annotated	FALSE
DGLUCY	ENSG00000133943.20	ENSG00000133943.20:s:91114063-91114283	-0.148721807740379	0.722407246286018	2.55590519127047e-06	0.855	0.667	s|1e1.1o1|1e2.1o2	FALSE	FALSE	TRUE	2	3	1	chr14	+	ENSG00000133943.20:s:91114063-91114283_91114283-91157639	91145221	91145313	91114283	91157639			43356	chr14:91114283-91157639	chr14:91145221-91145313	92	2	source	annotated	FALSE
BICDL1	ENSG00000135127.11	ENSG00000135127.11:t:120064637-120064879	0.145596635664242	0.739589401108724	2.07497809445431e-06	0.037	0.214	t|1e1.1o1|1e2.1o1	FALSE	FALSE	TRUE	2	3	1	chr12	+	ENSG00000135127.11:t:120064637-120064879_120061826-120064733	120061694	120061826	120061826	120064733			2907	chr12:120061826-120064733	chr12:120061694-120061826	132	0	target	annotated	FALSE
BICDL1	ENSG00000135127.11	ENSG00000135127.11:t:120064637-120064879	-0.145596683477199	0.739589762456772	2.07508474936446e-06	0.963	0.786	t|1e1.1o1|1e2.1o1	FALSE	FALSE	TRUE	2	3	0	chr12	+	ENSG00000135127.11:t:120064637-120064879_120062763-120064733	120062752	120062763	120062763	120064733			1970	chr12:120062763-120064733	chr12:120062752-120062763	11	2	target	novel_donor	FALSE
BICDL1	ENSG00000135127.11	ENSG00000135127.11:t:120080681-120081018	0.0563238457348607	0.0764764682934255	4.44988470511826e-05	0.063	0.132	t|1e1.1o1|1e2.1o1|1e3.1o1	FALSE	FALSE	TRUE	3	4	1	chr12	+	ENSG00000135127.11:t:120080681-120081018_120071801-120080887	120071622	120071801	120071801	120080887			9086	chr12:120071801-120080887	chr12:120071622-120071801	179	2	target	annotated	FALSE
BICDL1	ENSG00000135127.11	ENSG00000135127.11:t:120080681-120081018	0.0346455348551895	0.0202045863429206	0.000119425003112323	0.086	0.123	t|1e1.1o1|1e2.1o1|1e3.1o1	FALSE	FALSE	TRUE	3	4	1	chr12	+	ENSG00000135127.11:t:120080681-120081018_120072729-120080887	120072511	120072729	120072729	120080887			8158	chr12:120072729-120080887	chr12:120072511-120072729	218	2	target	annotated	FALSE
BICDL1	ENSG00000135127.11	ENSG00000135127.11:t:120080681-120081018	-0.10011630267315	0.495868929728679	3.46936080175553e-06	0.848	0.745	t|1e1.1o1|1e2.1o1|1e3.1o1	FALSE	FALSE	TRUE	3	4	1	chr12	+	ENSG00000135127.11:t:120080681-120081018_120074586-120080887	120074443	120074586	120074586	120080887			6301	chr12:120074586-120080887	chr12:120074443-120074586	143	2	target	annotated	FALSE
RNF38	ENSG00000137075.18	ENSG00000137075.18:t:36375934-36376127	-0.0439838335163142	0.095785879312355	2.11445821792777e-05	0.108	0.05	t|1e1.1o1|1e2.1o2|1e2.2o2|1e3.1o1|1e4.1o1|1e5.1o1	TRUE	FALSE	TRUE	6	6	0	chr9	-	ENSG00000137075.18:t:36375934-36376127_36376127-36424613	36375934	36376127	36376127	36424613			48486	chr9:36376127-36424613	chr9:36375934-36376127	193	1	target	novel_exon_skip	FALSE
RNF38	ENSG00000137075.18	ENSG00000137075.18:t:36375934-36376127	0.00139414619820714	4.25391497582783e-08	0.408417188314104	0.028	0.035	t|1e1.1o1|1e2.1o2|1e2.2o2|1e3.1o1|1e4.1o1|1e5.1o1	TRUE	FALSE	TRUE	6	6	0	chr9	-	ENSG00000137075.18:t:36375934-36376127_36376127-36401098	36390467	36390616	36376127	36401098			24971	chr9:36376127-36401098	chr9:36390467-36390616	149	2	target	novel_exon_skip	FALSE
RNF38	ENSG00000137075.18	ENSG00000137075.18:t:36375934-36376127	0.0135050460495105	0.00547556550842006	0.000177207076976855	0.064	0.095	t|1e1.1o1|1e2.1o2|1e2.2o2|1e3.1o1|1e4.1o1|1e5.1o1	TRUE	FALSE	TRUE	6	6	1	chr9	-	ENSG00000137075.18:t:36375934-36376127_36376127-36400936	36400097	36400299	36376127	36400936			24809	chr9:36376127-36400936	chr9:36400097-36400299	202	1	target	annotated	FALSE
RNF38	ENSG00000137075.18	ENSG00000137075.18:t:36375934-36376127	0.105003094285862	0.53272066819355	3.68540730042625e-06	0.293	0.414	t|1e1.1o1|1e2.1o2|1e2.2o2|1e3.1o1|1e4.1o1|1e5.1o1	TRUE	FALSE	TRUE	6	6	1	chr9	-	ENSG00000137075.18:t:36375934-36376127_36376127-36400554	36400554	36400923	36376127	36400554			24427	chr9:36376127-36400554	chr9:36400554-36400923	369	0	target	annotated	FALSE
RNF38	ENSG00000137075.18	ENSG00000137075.18:t:36375934-36376127	-0.027197913284788	4.93221057037236e-05	0.0389332745184113	0.057	0.01	t|1e1.1o1|1e2.1o2|1e2.2o2|1e3.1o1|1e4.1o1|1e5.1o1	TRUE	FALSE	TRUE	6	6	1	chr9	-	ENSG00000137075.18:t:36375934-36376127_36376127-36400097	36400936	36401198	36376127	36400097			23970	chr9:36376127-36400097	chr9:36400936-36401198	262	1	target	annotated	FALSE
RNF38	ENSG00000137075.18	ENSG00000137075.18:t:36375934-36376127	-0.0356105643296441	0.0870971060939223	2.34189306608235e-05	0.451	0.394	t|1e1.1o1|1e2.1o2|1e2.2o2|1e3.1o1|1e4.1o1|1e5.1o1	TRUE	FALSE	TRUE	6	6	1	chr9	-	ENSG00000137075.18:t:36375934-36376127_36376127-36390467	36424613	36424683	36376127	36390467			14340	chr9:36376127-36390467	chr9:36424613-36424683	70	1	target	annotated	FALSE
METTL5	ENSG00000138382.15	ENSG00000138382.15:s:169812457-169813175	-0.163338740758199	0.860044509983843	7.95253300245324e-06	0.653	0.484	s|1e1.1o1|i	FALSE	FALSE	FALSE	2	2	1	chr2	-	ENSG00000138382.15:s:169812457-169813175_169811858-169812457	169811757	169811858	169811858	169812457	169811859	169812456	599	chr2:169811858-169812457	chr2:169811757-169811858	101	2	source	annotated	FALSE
METTL5	ENSG00000138382.15	ENSG00000138382.15:s:169812457-169813175	0.163338757315891	0.860044361736241	7.95189599977489e-06	0.347	0.516	s|1e1.1o1|i	FALSE	FALSE	FALSE	2	2	1	chr2	-	ENSG00000138382.15:s:169812457-169813175_169811859-169812456	169812457	169813175	169811859	169812456			597	chr2:169811859-169812456	chr2:169812457-169813175	718	1	source	none	FALSE
FRAS1	ENSG00000138759.19	ENSG00000138759.19:s:78464443-78464583	-0.105290442497476	0.505677954352273	4.93525681533047e-06	0.79	0.64	s|1e1.1o1|1e2.1o1	FALSE	FALSE	TRUE	2	3	1	chr4	+	ENSG00000138759.19:s:78464443-78464583_78464583-78466208	78464443	78464583	78464583	78466208			1625	chr4:78464583-78466208	chr4:78464443-78464583	140	2	source	annotated	FALSE
FRAS1	ENSG00000138759.19	ENSG00000138759.19:s:78464443-78464583	0.105290428087387	0.505677659621686	4.93499970130801e-06	0.21	0.36	s|1e1.1o1|1e2.1o1	FALSE	FALSE	TRUE	2	3	0	chr4	+	ENSG00000138759.19:s:78464443-78464583_78464583-78469978	78466208	78466435	78464583	78469978			5395	chr4:78464583-78469978	chr4:78466208-78466435	227	2	source	novel_exon_skip	FALSE
FRAS1	ENSG00000138759.19	ENSG00000138759.19:t:78469978-78470091	0.122064542930174	0.590105789078563	3.94011418767247e-06	0.196	0.356	t|1e1.1o1|1e2.1o1	FALSE	FALSE	TRUE	2	3	0	chr4	+	ENSG00000138759.19:t:78469978-78470091_78464583-78469978	78464443	78464583	78464583	78469978			5395	chr4:78464583-78469978	chr4:78464443-78464583	140	2	target	novel_exon_skip	FALSE
FRAS1	ENSG00000138759.19	ENSG00000138759.19:t:78469978-78470091	-0.122064564651386	0.590106053995915	3.94031921591154e-06	0.804	0.644	t|1e1.1o1|1e2.1o1	FALSE	FALSE	TRUE	2	3	1	chr4	+	ENSG00000138759.19:t:78469978-78470091_78466435-78469978	78466208	78466435	78466435	78469978			3543	chr4:78466435-78469978	chr4:78466208-78466435	227	2	target	annotated	FALSE
NEIL1	ENSG00000140398.13	ENSG00000140398.13:t:75352324-75352387	-0.290787842795803	0.998128414254476	3.07370399132978e-08	0.371	0.069	t|1e1.8o9|1e2.2o2	FALSE	FALSE	TRUE	2	3	1	chr15	+	ENSG00000140398.13:t:75352324-75352387_75349339-75352324	75348884	75349690	75349339	75352324			2985	chr15:75349339-75352324	chr15:75348884-75349690	806	2	target	annotated	FALSE
NEIL1	ENSG00000140398.13	ENSG00000140398.13:t:75352324-75352387	0.290787850296453	0.998128430292006	3.07351559818346e-08	0.629	0.931	t|1e1.8o9|1e2.2o2	FALSE	FALSE	TRUE	2	3	1	chr15	+	ENSG00000140398.13:t:75352324-75352387_75352230-75352324	75352111	75352230	75352230	75352324			94	chr15:75352230-75352324	chr15:75352111-75352230	119	2	target	annotated	FALSE
PCTP	ENSG00000141179.13	ENSG00000141179.13:s:55774792-55774859	0.048785122264518	0.15567143563589	1.47394583137194e-05	0.099	0.177	s|1e1.1o2|1e1.2o2|1e2.1o1	FALSE	TRUE	TRUE	3	3	1	chr17	+	ENSG00000141179.13:s:55774792-55774859_55774859-55775311	55774792	55774859	55774859	55775311			452	chr17:55774859-55775311	chr17:55774792-55774859	67	1	source	annotated	FALSE
PCTP	ENSG00000141179.13	ENSG00000141179.13:s:55774792-55774859	-0.103368247246978	0.507935749927604	4.56391765368824e-06	0.796	0.657	s|1e1.1o2|1e1.2o2|1e2.1o1	FALSE	TRUE	TRUE	3	3	1	chr17	+	ENSG00000141179.13:s:55774792-55774859_55774859-55776035	55775311	55777387	55774859	55776035			1176	chr17:55774859-55776035	chr17:55775311-55777387	2076	0	source	annotated	FALSE
PCTP	ENSG00000141179.13	ENSG00000141179.13:s:55774792-55774859	0.0360038119296501	0.092676294850098	2.21454460432495e-05	0.105	0.166	s|1e1.1o2|1e1.2o2|1e2.1o1	FALSE	TRUE	TRUE	3	3	1	chr17	+	ENSG00000141179.13:s:55774792-55774859_55774859-55822761	55822761	55823090	55774859	55822761			47902	chr17:55774859-55822761	chr17:55822761-55823090	329	2	source	annotated	FALSE
PRKACB	ENSG00000142875.19	ENSG00000142875.19:t:84179176-84179238	-0.101539351824672	0.503774772935441	4.39392737094924e-06	0.51	0.377	t|1e1.1o1|1e2.1o1|1e3.1o1|1e4.1o1	FALSE	FALSE	TRUE	4	5	1	chr1	+	ENSG00000142875.19:t:84179176-84179238_84078371-84179177	84078062	84078371	84078371	84179177			100806	chr1:84078371-84179177	chr1:84078062-84078371	309	0	target	annotated	FALSE
PRKACB	ENSG00000142875.19	ENSG00000142875.19:t:84179176-84179238	-0.0252422709717628	0.0170149399191088	0.000117448613094484	0.117	0.08	t|1e1.1o1|1e2.1o1|1e3.1o1|1e4.1o1	FALSE	FALSE	TRUE	4	5	1	chr1	+	ENSG00000142875.19:t:84179176-84179238_84164422-84179177	84164317	84164422	84164422	84179177			14755	chr1:84164422-84179177	chr1:84164317-84164422	105	0	target	annotated	FALSE
PRKACB	ENSG00000142875.19	ENSG00000142875.19:t:84179176-84179238	0.000553142191080019	0.00755182460476573	0.000151973681230655	0.139	0.139	t|1e1.1o1|1e2.1o1|1e3.1o1|1e4.1o1	FALSE	FALSE	TRUE	4	5	1	chr1	+	ENSG00000142875.19:t:84179176-84179238_84175056-84179177	84175033	84175056	84175056	84179177			4121	chr1:84175056-84179177	chr1:84175033-84175056	23	2	target	annotated	FALSE
PRKACB	ENSG00000142875.19	ENSG00000142875.19:t:84179176-84179238	0.147295556284253	0.760568811140963	1.85964744039415e-06	0.236	0.4	t|1e1.1o1|1e2.1o1|1e3.1o1|1e4.1o1	FALSE	FALSE	TRUE	4	5	1	chr1	+	ENSG00000142875.19:t:84179176-84179238_84175807-84179177	84175799	84175807	84175807	84179177			3370	chr1:84175807-84179177	chr1:84175799-84175807	8	2	target	annotated	FALSE
SLC4A10	ENSG00000144290.17	ENSG00000144290.17:t:161879131-161879288	-0.142076833278202	0.73123722581393	2.13734041920599e-06	0.638	0.473	t|1e1.1o1|1e2.2o2	FALSE	FALSE	TRUE	2	3	1	chr2	+	ENSG00000144290.17:t:161879131-161879288_161872384-161879131	161872293	161872384	161872384	161879131			6747	chr2:161872384-161879131	chr2:161872293-161872384	91	1	target	annotated	FALSE
SLC4A10	ENSG00000144290.17	ENSG00000144290.17:t:161879131-161879288	0.142076843983849	0.731237167859471	2.13722825714263e-06	0.362	0.527	t|1e1.1o1|1e2.2o2	FALSE	FALSE	TRUE	2	3	1	chr2	+	ENSG00000144290.17:t:161879131-161879288_161874005-161879131	161873794	161874005	161874005	161879131			5126	chr2:161874005-161879131	chr2:161873794-161874005	211	1	target	annotated	FALSE
SLC4A10	ENSG00000144290.17	ENSG00000144290.17:t:161983179-161985282	0.120179171749471	0.627958603142049	2.76705932252288e-06	0.258	0.393	t|1e1.1o1|1e2.1o1	FALSE	FALSE	TRUE	2	3	1	chr2	+	ENSG00000144290.17:t:161983179-161985282_161976876-161983179	161976760	161976876	161976876	161983179			6303	chr2:161976876-161983179	chr2:161976760-161976876	116	2	target	annotated	FALSE
SLC4A10	ENSG00000144290.17	ENSG00000144290.17:t:161983179-161985282	-0.120179222666794	0.627958973881294	2.76721156744486e-06	0.742	0.607	t|1e1.1o1|1e2.1o1	FALSE	FALSE	TRUE	2	3	1	chr2	+	ENSG00000144290.17:t:161983179-161985282_161977760-161983179	161977722	161977760	161977760	161983179			5419	chr2:161977760-161983179	chr2:161977722-161977760	38	2	target	annotated	FALSE
TMEM44	ENSG00000145014.17	ENSG00000145014.17:s:194604287-194604445	0.114721341880859	0.576710412227685	3.6836029461312e-06	0.225	0.375	s|1e1.1o2|1e2.1o1	FALSE	FALSE	TRUE	2	3	1	chr3	-	ENSG00000145014.17:s:194604287-194604445_194593073-194604287	194587673	194588639	194593073	194604287			11214	chr3:194593073-194604287	chr3:194587673-194588639	966	0	source	annotated	FALSE
TMEM44	ENSG00000145014.17	ENSG00000145014.17:s:194604287-194604445	-0.114721359422649	0.576710700312959	3.68380414439429e-06	0.775	0.625	s|1e1.1o2|1e2.1o1	FALSE	FALSE	TRUE	2	3	1	chr3	-	ENSG00000145014.17:s:194604287-194604445_194588639-194604287	194593041	194593073	194588639	194604287			15648	chr3:194588639-194604287	chr3:194593041-194593073	32	2	source	annotated	FALSE
ZNF182	ENSG00000147118.11	ENSG00000147118.11:s:48002595-48002653	-0.342361364082232	0.998126769820094	8.46877920013256e-08	0.506	0.154	s|1e1.1o1|1e2.1o1	FALSE	FALSE	TRUE	2	3	1	chrX	-	ENSG00000147118.11:s:48002595-48002653_47988617-48002595	47983285	47983411	47988617	48002595			13978	chrX:47988617-48002595	chrX:47983285-47983411	126	0	source	annotated	FALSE
ZNF182	ENSG00000147118.11	ENSG00000147118.11:s:48002595-48002653	0.342361342702349	0.998126764749215	8.46830980383543e-08	0.494	0.846	s|1e1.1o1|1e2.1o1	FALSE	FALSE	TRUE	2	3	1	chrX	-	ENSG00000147118.11:s:48002595-48002653_47983411-48002595	47988524	47988617	47983411	48002595			19184	chrX:47983411-48002595	chrX:47988524-47988617	93	0	source	annotated	FALSE
ZNF182	ENSG00000147118.11	ENSG00000147118.11:t:47983285-47983411	0.161398483144139	0.75987412419022	2.35429608319554e-06	0.454	0.658	t|1e1.1o1|1e2.1o1	FALSE	FALSE	TRUE	2	3	1	chrX	-	ENSG00000147118.11:t:47983285-47983411_47983411-48002595	47983285	47983411	47983411	48002595			19184	chrX:47983411-48002595	chrX:47983285-47983411	126	0	target	annotated	FALSE
ZNF182	ENSG00000147118.11	ENSG00000147118.11:t:47983285-47983411	-0.161398488246322	0.759874320556703	2.35441057139241e-06	0.546	0.342	t|1e1.1o1|1e2.1o1	FALSE	FALSE	TRUE	2	3	1	chrX	-	ENSG00000147118.11:t:47983285-47983411_47983411-47988524	47988524	47988617	47983411	47988524			5113	chrX:47983411-47988524	chrX:47988524-47988617	93	0	target	annotated	FALSE
ADD3	ENSG00000148700.14	ENSG00000148700.14:s:110118587-110118736	-0.193430856030763	0.884044891073799	8.96036773756492e-06	0.655	0.426	s|1e1.1o2|i	FALSE	FALSE	FALSE	2	2	1	chr10	+	ENSG00000148700.14:s:110118587-110118736_110118736-110119211	110118587	110118736	110118736	110119211	110118737	110119210	475	chr10:110118736-110119211	chr10:110118587-110118736	149	2	source	annotated	FALSE
ADD3	ENSG00000148700.14	ENSG00000148700.14:s:110118587-110118736	0.193430882711333	0.884044832075746	8.95966959300455e-06	0.345	0.574	s|1e1.1o2|i	FALSE	FALSE	FALSE	2	2	0	chr10	+	ENSG00000148700.14:s:110118587-110118736_110118737-110119210	110119211	110119354	110118737	110119210			473	chr10:110118737-110119210	chr10:110119211-110119354	143	2	source	none	FALSE
TIRAP	ENSG00000150455.13	ENSG00000150455.13:t:126290803-126290961	-0.142076584221185	0.705238952378239	2.56568379963795e-06	0.253	0.075	t|1e1.1o1|1e2.1o1	FALSE	FALSE	TRUE	2	3	1	chr11	+	ENSG00000150455.13:t:126290803-126290961_126283153-126290803	126283065	126283153	126283153	126290803			7650	chr11:126283153-126290803	chr11:126283065-126283153	88	1	target	annotated	FALSE
TIRAP	ENSG00000150455.13	ENSG00000150455.13:t:126290803-126290961	0.142076528391094	0.705238606911081	2.56555440829274e-06	0.747	0.925	t|1e1.1o1|1e2.1o1	FALSE	FALSE	TRUE	2	3	1	chr11	+	ENSG00000150455.13:t:126290803-126290961_126290585-126290803	126290462	126290585	126290585	126290803			218	chr11:126290585-126290803	chr11:126290462-126290585	123	0	target	annotated	FALSE
SEMA3D	ENSG00000153993.13	ENSG00000153993.13:s:85186678-85186855	0.430242427146348	0.996885185254084	3.99917976166206e-07	0.089	0.53	s|1e1.1o1|1e2.1o1	FALSE	FALSE	TRUE	2	3	0	chr7	-	ENSG00000153993.13:s:85186678-85186855_85181286-85186678	85153608	85153739	85181286	85186678			5392	chr7:85181286-85186678	chr7:85153608-85153739	131	2	source	novel_acceptor	FALSE
SEMA3D	ENSG00000153993.13	ENSG00000153993.13:s:85186678-85186855	-0.430242275520929	0.996885149897086	3.99939921069681e-07	0.911	0.47	s|1e1.1o1|1e2.1o1	FALSE	FALSE	TRUE	2	3	1	chr7	-	ENSG00000153993.13:s:85186678-85186855_85153739-85186678	85181129	85181286	85153739	85186678			32939	chr7:85153739-85186678	chr7:85181129-85181286	157	1	source	annotated	FALSE
ETS2	ENSG00000157557.13	ENSG00000157557.13:t:38810035-38810106	-0.205522584467393	0.999150758813519	4.86499729390744e-13	0.984	0.768	t|1e1.1o1|1e2.1o1	FALSE	FALSE	TRUE	2	3	1	chr21	+	ENSG00000157557.13:t:38810035-38810106_38806120-38810035	38805895	38806120	38806120	38810035			3915	chr21:38806120-38810035	chr21:38805895-38806120	225	0	target	annotated	FALSE
ETS2	ENSG00000157557.13	ENSG00000157557.13:t:38810035-38810106	0.205522579002457	0.999150745902156	6.51256230051533e-13	0.016	0.232	t|1e1.1o1|1e2.1o1	FALSE	FALSE	TRUE	2	3	1	chr21	+	ENSG00000157557.13:t:38810035-38810106_38806808-38810035	38806451	38806808	38806808	38810035			3227	chr21:38806808-38810035	chr21:38806451-38806808	357	0	target	annotated	FALSE
RAPGEF6	ENSG00000158987.20	ENSG00000158987.20:s:131430859-131431349	0.156257793256826	0.863617873005944	6.2819594787662e-07	0.505	0.677	s|1e1.1o1|1e2.1o1	FALSE	FALSE	TRUE	2	3	1	chr5	-	ENSG00000158987.20:s:131430859-131431349_131429216-131430859	131423921	131427291	131429216	131430859			1643	chr5:131429216-131430859	chr5:131423921-131427291	3370	1	source	annotated	FALSE
RAPGEF6	ENSG00000158987.20	ENSG00000158987.20:s:131430859-131431349	-0.15625780582064	0.863617932341623	6.28227059928932e-07	0.495	0.323	s|1e1.1o1|1e2.1o1	FALSE	FALSE	TRUE	2	3	1	chr5	-	ENSG00000158987.20:s:131430859-131431349_131427291-131430859	131428902	131429216	131427291	131430859			3568	chr5:131427291-131430859	chr5:131428902-131429216	314	2	source	annotated	FALSE
RAPGEF6	ENSG00000158987.20	ENSG00000158987.20:t:131423921-131427291	-0.104471645702981	0.532654384315508	3.64433228094985e-06	0.518	0.392	t|1e1.1o1|1e2.1o1	FALSE	FALSE	TRUE	2	3	1	chr5	-	ENSG00000158987.20:t:131423921-131427291_131427291-131430859	131423921	131427291	131427291	131430859			3568	chr5:131427291-131430859	chr5:131423921-131427291	3370	1	target	annotated	FALSE
RAPGEF6	ENSG00000158987.20	ENSG00000158987.20:t:131423921-131427291	0.104471604730715	0.532653913406557	3.64412364515877e-06	0.482	0.608	t|1e1.1o1|1e2.1o1	FALSE	FALSE	TRUE	2	3	1	chr5	-	ENSG00000158987.20:t:131423921-131427291_131427291-131428902	131428902	131429216	131427291	131428902			1611	chr5:131427291-131428902	chr5:131428902-131429216	314	2	target	annotated	FALSE
PCSK7	ENSG00000160613.12	ENSG00000160613.12:t:117207970-117208488	0.131960199087932	0.715879876811812	1.8943224156555e-06	0.134	0.282	t|1e1.1o1|1e2.1o1	FALSE	FALSE	TRUE	2	3	0	chr11	-	ENSG00000160613.12:t:117207970-117208488_117208064-117218466	117207970	117208488	117208064	117218466			10402	chr11:117208064-117218466	chr11:117207970-117208488	518	2	target	novel_exon_skip	FALSE
PCSK7	ENSG00000160613.12	ENSG00000160613.12:t:117207970-117208488	-0.131960180944108	0.715879827444071	1.8944276560795e-06	0.866	0.718	t|1e1.1o1|1e2.1o1	FALSE	FALSE	TRUE	2	3	1	chr11	-	ENSG00000160613.12:t:117207970-117208488_117208064-117208897	117208897	117209053	117208064	117208897			833	chr11:117208064-117208897	chr11:117208897-117209053	156	0	target	annotated	FALSE
HIPK1	ENSG00000163349.22	ENSG00000163349.22:t:113966130-113966272	-0.0103667720005903	0.0081543790053961	0.000144199444296778	0.075	0.058	t|1e1.1o1|1e2.1o1|2e3.1o1|2e4.1o1	FALSE	TRUE	TRUE	4	5	1	chr1	+	ENSG00000163349.22:t:113966130-113966272_113962438-113966130	113962317	113962438	113962438	113966130			3692	chr1:113962438-113966130	chr1:113962317-113962438	121	1	target	annotated	FALSE
HIPK1	ENSG00000163349.22	ENSG00000163349.22:t:113966130-113966272	-0.0670892948782956	0.276718468492092	9.04767107956506e-06	0.859	0.758	t|1e1.1o1|1e2.1o1|2e3.1o1|2e4.1o1	FALSE	TRUE	TRUE	4	5	1	chr1	+	ENSG00000163349.22:t:113966130-113966272_113963521-113966130	113963387	113963521	113963521	113966130			2609	chr1:113963521-113966130	chr1:113963387-113963521	134	2	target	annotated	FALSE
HIPK1	ENSG00000163349.22	ENSG00000163349.22:t:113966130-113966272	0.107256624916432	0.554653518885817	2.56200901137278e-06	0.014	0.144	t|1e1.1o1|1e2.1o1|2e3.1o1|2e4.1o1	FALSE	TRUE	TRUE	4	5	0	chr1	+	ENSG00000163349.22:t:113966130-113966272_113962438-113966133	113966130	113966272	113962438	113966133			3695	chr1:113962438-113966133	chr1:113966130-113966272	142	1	target	novel_combo	TRUE
HIPK1	ENSG00000163349.22	ENSG00000163349.22:t:113966130-113966272	-0.00707658159712365	0.00152238171873262	0.000767668128840549	0.051	0.04	t|1e1.1o1|1e2.1o1|2e3.1o1|2e4.1o1	FALSE	TRUE	TRUE	4	5	1	chr1	+	ENSG00000163349.22:t:113966130-113966272_113963521-113966133			113963521	113966133			2612	chr1:113963521-113966133	chr1:NA-NA			target	annotated	FALSE
KIAA1324L	ENSG00000164659.15	ENSG00000164659.15:s:87039756-na	-0.107488550482203	0.489357270157267	5.89646978144121e-06	0.707	0.532	s|1e1.1o1|1e2.1o1	FALSE	FALSE	TRUE	2	3	0	chr7	-	ENSG00000164659.15:s:87039756-na_86965024-87039756	86947727	86947922	86965024	87039756			74732	chr7:86965024-87039756	chr7:86947727-86947922	195	0	source	novel_donor	FALSE
KIAA1324L	ENSG00000164659.15	ENSG00000164659.15:s:87039756-na	0.107488522048517	0.489356927602421	5.89620796002076e-06	0.293	0.468	s|1e1.1o1|1e2.1o1	FALSE	FALSE	TRUE	2	3	0	chr7	-	ENSG00000164659.15:s:87039756-na_86947922-87039756	86964904	86965024	86947922	87039756			91834	chr7:86947922-87039756	chr7:86964904-86965024	120	0	source	novel_donor	FALSE
FAM204A	ENSG00000165669.14	ENSG00000165669.14:s:118342270-118342328	-0.147467238291082	0.793098222833966	1.26746577211456e-06	0.502	0.343	s|1e1.2o3|1e2.1o1	FALSE	FALSE	TRUE	2	3	1	chr10	-	ENSG00000165669.14:s:118342270-118342328_118341927-118342270	118336025	118336423	118341927	118342270			343	chr10:118341927-118342270	chr10:118336025-118336423	398	2	source	annotated	FALSE
FAM204A	ENSG00000165669.14	ENSG00000165669.14:s:118342270-118342328	0.147467216293458	0.793097996689169	1.26740005064979e-06	0.498	0.657	s|1e1.2o3|1e2.1o1	FALSE	FALSE	TRUE	2	3	1	chr10	-	ENSG00000165669.14:s:118342270-118342328_118336423-118342270	118341727	118342240	118336423	118342270			5847	chr10:118336423-118342270	chr10:118341727-118342240	513	0	source	annotated	FALSE
ZSCAN21	ENSG00000166529.14	ENSG00000166529.14:t:100056911-100057276	0.0319839165096595	0.105096598030882	2.04703006528133e-05	0.453	0.512	t|1e1.1o1|1e2.1o1|1e3.1o1	FALSE	FALSE	TRUE	3	4	1	chr7	+	ENSG00000166529.14:t:100056911-100057276_100049841-100056911		100050836	100049841	100056911			7070	chr7:100049841-100056911	chr7:nan-100050836			target	annotated	FALSE
ZSCAN21	ENSG00000166529.14	ENSG00000166529.14:t:100056911-100057276	0.0718512504619178	0.235291327480152	1.08220969498828e-05	0.023	0.109	t|1e1.1o1|1e2.1o1|1e3.1o1	FALSE	FALSE	TRUE	3	4	0	chr7	+	ENSG00000166529.14:t:100056911-100057276_100050836-100056911	100049774	100049841	100050836	100056911			6075	chr7:100050836-100056911	chr7:100049774-100049841	67	1	target	novel_donor	FALSE
ZSCAN21	ENSG00000166529.14	ENSG00000166529.14:t:100056911-100057276	-0.117065406399468	0.591618091923386	3.52414850834926e-06	0.524	0.377	t|1e1.1o1|1e2.1o1|1e3.1o1	FALSE	FALSE	TRUE	3	4	1	chr7	+	ENSG00000166529.14:t:100056911-100057276_100051610-100056911	100051478	100051610	100051610	100056911			5301	chr7:100051610-100056911	chr7:100051478-100051610	132	0	target	annotated	FALSE
TRAPPC9	ENSG00000167632.16	ENSG00000167632.16:s:140435112-140435240	-0.254614772459465	0.993130212533571	6.22511749925891e-08	0.46	0.194	s|1e1.1o1|1e2.1o1	FALSE	FALSE	TRUE	2	3	1	chr8	-	ENSG00000167632.16:s:140435112-140435240_140426641-140435112	140405293	140405698	140426641	140435112			8471	chr8:140426641-140435112	chr8:140405293-140405698	405	0	source	annotated	FALSE
TRAPPC9	ENSG00000167632.16	ENSG00000167632.16:s:140435112-140435240	0.254614778660382	0.993130214004263	6.22488067890444e-08	0.54	0.806	s|1e1.1o1|1e2.1o1	FALSE	FALSE	TRUE	2	3	1	chr8	-	ENSG00000167632.16:s:140435112-140435240_140405698-140435112	140426615	140426641	140405698	140435112			29414	chr8:140405698-140435112	chr8:140426615-140426641	26	2	source	annotated	FALSE
TRAPPC9	ENSG00000167632.16	ENSG00000167632.16:t:140405293-140405698	0.2035614631916	0.971725549683062	1.35849936931225e-07	0.225	0.431	t|1e1.1o1|1e2.1o1	FALSE	FALSE	TRUE	2	3	1	chr8	-	ENSG00000167632.16:t:140405293-140405698_140405698-140435112	140405293	140405698	140405698	140435112			29414	chr8:140405698-140435112	chr8:140405293-140405698	405	0	target	annotated	FALSE
TRAPPC9	ENSG00000167632.16	ENSG00000167632.16:t:140405293-140405698	-0.203561486995158	0.971725563027483	1.35855723004674e-07	0.775	0.569	t|1e1.1o1|1e2.1o1	FALSE	FALSE	TRUE	2	3	1	chr8	-	ENSG00000167632.16:t:140405293-140405698_140405698-140426615	140426615	140426641	140405698	140426615			20917	chr8:140405698-140426615	chr8:140426615-140426641	26	2	target	annotated	FALSE
LRRC28	ENSG00000168904.15	ENSG00000168904.15:s:99352369-99352527	-8.06229747186239e-05	1.0700641765202e-06	0.0436503972885438	0.024	0.019	s|1e1.1o1|1e2.1o1|1e3.1o1|1e4.2o2	FALSE	FALSE	TRUE	4	5	1	chr15	+	ENSG00000168904.15:s:99352369-99352527_99352471-99353661	99352369	99352527	99352471	99353661			1190	chr15:99352471-99353661	chr15:99352369-99352527	158	2	source	annotated	FALSE
LRRC28	ENSG00000168904.15	ENSG00000168904.15:s:99352369-99352527	0.169197275511525	0.834940901103746	1.36790473745256e-06	0.347	0.533	s|1e1.1o1|1e2.1o1|1e3.1o1|1e4.2o2	FALSE	FALSE	TRUE	4	5	1	chr15	+	ENSG00000168904.15:s:99352369-99352527_99352471-99355406	99353661	99354000	99352471	99355406			2935	chr15:99352471-99355406	chr15:99353661-99354000	339	0	source	annotated	FALSE
LRRC28	ENSG00000168904.15	ENSG00000168904.15:s:99352369-99352527	-0.009061242577134	0.000801744191474184	0.00163133790806547	0.054	0.043	s|1e1.1o1|1e2.1o1|1e3.1o1|1e4.2o2	FALSE	FALSE	TRUE	4	5	0	chr15	+	ENSG00000168904.15:s:99352369-99352527_99352471-99360218	99355406	99355719	99352471	99360218			7747	chr15:99352471-99360218	chr15:99355406-99355719	313	1	source	novel_acceptor	FALSE
LRRC28	ENSG00000168904.15	ENSG00000168904.15:s:99352369-99352527	-0.150845786243073	0.756337759586419	2.05262760000213e-06	0.573	0.406	s|1e1.1o1|1e2.1o1|1e3.1o1|1e4.2o2	FALSE	FALSE	TRUE	4	5	1	chr15	+	ENSG00000168904.15:s:99352369-99352527_99352471-99361336	99360218	99360286	99352471	99361336			8865	chr15:99352471-99361336	chr15:99360218-99360286	68	2	source	annotated	FALSE
CAMTA1	ENSG00000171735.19	ENSG00000171735.19:s:6825092-6825210	0.100715439003369	0.504379905077493	3.72896053953925e-06	0.454	0.561	s|1e1.1o1|1e2.1o1|1e3.1o1|1e4.1o1	FALSE	FALSE	TRUE	4	5	1	chr1	+	ENSG00000171735.19:s:6825092-6825210_6825210-6871757	6825092	6825210	6825210	6871757			46547	chr1:6825210-6871757	chr1:6825092-6825210	118	1	source	annotated	FALSE
CAMTA1	ENSG00000171735.19	ENSG00000171735.19:s:6825092-6825210	7.77155965710684e-16	8.56558349536148e-21	0.999999999943745	0.005	0.002	s|1e1.1o1|1e2.1o1|1e3.1o1|1e4.1o1	FALSE	FALSE	TRUE	4	5	1	chr1	+	ENSG00000171735.19:s:6825092-6825210_6825210-6886240	6871757	6872053	6825210	6886240			61030	chr1:6825210-6886240	chr1:6871757-6872053	296	2	source	annotated	FALSE
CAMTA1	ENSG00000171735.19	ENSG00000171735.19:s:6825092-6825210	-0.0340380263696769	0.0478221865310915	4.37034012643611e-05	0.213	0.165	s|1e1.1o1|1e2.1o1|1e3.1o1|1e4.1o1	FALSE	FALSE	TRUE	4	5	1	chr1	+	ENSG00000171735.19:s:6825092-6825210_6825210-6887654	6886240	6886346	6825210	6887654			62444	chr1:6825210-6887654	chr1:6886240-6886346	106	1	source	annotated	FALSE
CAMTA1	ENSG00000171735.19	ENSG00000171735.19:s:6825092-6825210	-0.0471875190971608	0.112516257197701	2.16320689170324e-05	0.331	0.274	s|1e1.1o1|1e2.1o1|1e3.1o1|1e4.1o1	FALSE	FALSE	TRUE	4	5	1	chr1	+	ENSG00000171735.19:s:6825092-6825210_6825210-7091304	6887654	6888201	6825210	7091304			266094	chr1:6825210-7091304	chr1:6887654-6888201	547	1	source	annotated	FALSE
CAMTA1	ENSG00000171735.19	ENSG00000171735.19:s:7661726-7661866	-0.302960204072252	0.99996217804869	4.40701919401931e-11	0.996	0.667	s|1e1.1o1|i	FALSE	FALSE	FALSE	2	2	1	chr1	+	ENSG00000171735.19:s:7661726-7661866_7661866-7663353	7661726	7661866	7661866	7663353	7661867	7663352	1487	chr1:7661866-7663353	chr1:7661726-7661866	140	2	source	annotated	FALSE
CAMTA1	ENSG00000171735.19	ENSG00000171735.19:s:7661726-7661866	0.302960167943614	0.999962171580545	4.80115152976673e-11	0.004	0.333	s|1e1.1o1|i	FALSE	FALSE	FALSE	2	2	0	chr1	+	ENSG00000171735.19:s:7661726-7661866_7661867-7663352	7663353	7665199	7661867	7663352			1485	chr1:7661867-7663352	chr1:7663353-7665199	1846	1	source	none	TRUE
CAMTA1	ENSG00000171735.19	ENSG00000171735.19:t:7751199-7751392	-0.10459505150614	0.527446514674887	4.27612702684765e-05	0.325	0.184	t|1e1.1o1|1e2.1o1|i	FALSE	FALSE	TRUE	3	3	1	chr1	+	ENSG00000171735.19:t:7751199-7751392_7747781-7751199	7747710	7747781	7747781	7751199	7749792	7751198	3418	chr1:7747781-7751199	chr1:7747710-7747781	71	2	target	annotated	FALSE
CAMTA1	ENSG00000171735.19	ENSG00000171735.19:t:7751199-7751392	0.0437639886496051	0.189039246223167	0.000138330799798615	0.482	0.562	t|1e1.1o1|1e2.1o1|i	FALSE	FALSE	TRUE	3	3	1	chr1	+	ENSG00000171735.19:t:7751199-7751392_7749791-7751199	7749771	7749791	7749791	7751199			1408	chr1:7749791-7751199	chr1:7749771-7749791	20	2	target	annotated	FALSE
CAMTA1	ENSG00000171735.19	ENSG00000171735.19:t:7751199-7751392	0.0254024816330928	0.0858062193176315	0.00026262377712491	0.194	0.249	t|1e1.1o1|1e2.1o1|i	FALSE	FALSE	TRUE	3	3	0	chr1	+	ENSG00000171735.19:t:7751199-7751392_7749792-7751198	7751199	7751392	7749792	7751198			1406	chr1:7749792-7751198	chr1:7751199-7751392	193	1	target	none	FALSE
ZNF266	ENSG00000174652.19	ENSG00000174652.19:s:9419051-9419081	0.0150147301893574	0.024470373665152	0.000656718245433716	0.072	0.105	s|1e1.1o1|1e2.1o1|i	FALSE	FALSE	TRUE	3	3	1	chr19	-	ENSG00000174652.19:s:9419051-9419081_9418895-9419051	9418505	9418631	9418895	9419051	9418896	9419050	156	chr19:9418895-9419051	chr19:9418505-9418631	126	0	source	annotated	FALSE
ZNF266	ENSG00000174652.19	ENSG00000174652.19:s:9419051-9419081	-0.164764505444574	0.817997787667711	1.31162116180361e-05	0.379	0.184	s|1e1.1o1|1e2.1o1|i	FALSE	FALSE	TRUE	3	3	1	chr19	-	ENSG00000174652.19:s:9419051-9419081_9418631-9419051	9418762	9418895	9418631	9419051			420	chr19:9418631-9419051	chr19:9418762-9418895	133	1	source	annotated	FALSE
ZNF266	ENSG00000174652.19	ENSG00000174652.19:s:9419051-9419081	0.117458660763369	0.58495660459339	3.64106701842078e-05	0.551	0.706	s|1e1.1o1|1e2.1o1|i	FALSE	FALSE	TRUE	3	3	1	chr19	-	ENSG00000174652.19:s:9419051-9419081_9418896-9419050	9419051	9419081	9418896	9419050			154	chr19:9418896-9419050	chr19:9419051-9419081	30	0	source	none	FALSE
ZNF266	ENSG00000174652.19	ENSG00000174652.19:s:9434798-9434859	-0.135693153598689	0.680175103781527	2.77810053384009e-06	0.642	0.472	s|1e1.1o1|1e2.2o2	FALSE	FALSE	TRUE	2	3	1	chr19	-	ENSG00000174652.19:s:9434798-9434859_9434235-9434798	9420065	9420745	9434235	9434798			563	chr19:9434235-9434798	chr19:9420065-9420745	680	2	source	annotated	FALSE
ZNF266	ENSG00000174652.19	ENSG00000174652.19:s:9434798-9434859	0.135693125351406	0.680174913626467	2.77795590027746e-06	0.358	0.528	s|1e1.1o1|1e2.2o2	FALSE	FALSE	TRUE	2	3	1	chr19	-	ENSG00000174652.19:s:9434798-9434859_9420218-9434798	9434065	9434235	9420218	9434798			14580	chr19:9420218-9434798	chr19:9434065-9434235	170	2	source	annotated	FALSE
RUFY1	ENSG00000176783.15	ENSG00000176783.15:s:179585796-179585865	0.129300744492932	0.729423628297797	1.26719393252884e-06	0.126	0.268	s|1e1.1o1|1e2.2o2	FALSE	FALSE	TRUE	2	3	1	chr5	+	ENSG00000176783.15:s:179585796-179585865_179585865-179586331	179585796	179585865	179585865	179586331			466	chr5:179585865-179586331	chr5:179585796-179585865	69	0	source	annotated	FALSE
RUFY1	ENSG00000176783.15	ENSG00000176783.15:s:179585796-179585865	-0.129300696984412	0.729423514083228	1.26726578619785e-06	0.874	0.732	s|1e1.1o1|1e2.2o2	FALSE	FALSE	TRUE	2	3	1	chr5	+	ENSG00000176783.15:s:179585796-179585865_179585865-179589546	179586331	179586563	179585865	179589546			3681	chr5:179585865-179589546	chr5:179586331-179586563	232	1	source	annotated	FALSE
HYI	ENSG00000178922.16	ENSG00000178922.16:s:43453161-43453497	0.189921462785329	0.967517836150519	7.21809273629371e-07	0.034	0.232	s|1e1.1o2|2e1.1o2|i	TRUE	FALSE	FALSE	3	2	1	chr1	-	ENSG00000178922.16:s:43453161-43453497_43452319-43453413	43452205	43452319	43452319	43453413	43453005	43453160	1094	chr1:43452319-43453413	chr1:43452205-43452319	114	0	source	annotated	FALSE
HYI	ENSG00000178922.16	ENSG00000178922.16:s:43453161-43453497	-0.175720570794494	0.883500573286073	7.15524707273207e-06	0.399	0.206	s|1e1.1o2|2e1.1o2|i	TRUE	FALSE	FALSE	3	2	1	chr1	-	ENSG00000178922.16:s:43453161-43453497_43452319-43453386	43453161	43453497	43452319	43453386			1067	chr1:43452319-43453386	chr1:43453161-43453497	336	0	source	annotated	FALSE
HYI	ENSG00000178922.16	ENSG00000178922.16:s:43453161-43453497	-7.46400416913868e-05	0.0396648222642278	0.000468992997274653	0.568	0.564	s|1e1.1o2|2e1.1o2|i	TRUE	FALSE	FALSE	3	2	0	chr1	-	ENSG00000178922.16:s:43453161-43453497_43453005-43453160			43453005	43453160			155	chr1:43453005-43453160	chr1:NA-NA			source	none	FALSE
HYI	ENSG00000178922.16	ENSG00000178922.16:t:43452205-43452319	0.197938875835903	0.983196802466782	2.55616271252022e-07	0.031	0.234	t|1e1.1o3|1e1.2o3|i	TRUE	FALSE	FALSE	3	2	1	chr1	-	ENSG00000178922.16:t:43452205-43452319_43452319-43453413	43452205	43452319	43452319	43453413	43452320	43452902	1094	chr1:43452319-43453413	chr1:43452205-43452319	114	0	target	annotated	FALSE
[truncated: 5,953 more rows]
