# Supplementary material for: TDP-43 loss and ALS-risk SNPs drive mis-splicing and depletion of UNC13A
Source: Nature. 2022 Feb 23;603(7899):131–7. doi: 10.1038/s41586-022-04436-3 (PMC8891020; doi:10.1038/s41586-022-04436-3)
Supplement: Supplementary file 13 — List of differentially ribosomal profiling genes between control and TDP-43-knockdown i3Neurons (Fig 2c). [file 41586_2022_4436_MOESM13_ESM.csv]

gene_id	baseMean	log2FoldChange	lfcSE	stat	pvalue	padj	gene_name	transcript_id	cds_start	cds_length	tx_length	cds_end
ENSG00000186092.6	0	NA	NA	NA	NA	NA	OR4F5	ENST00000335137.4	37	918	1054	954
ENSG00000284733.1	0	NA	NA	NA	NA	NA	OR4F29	ENST00000426406.3	20	939	995	958
ENSG00000284662.1	0	NA	NA	NA	NA	NA	OR4F16	ENST00000332831.4	20	939	995	958
ENSG00000187634.11	69.60858777560655	-0.13860121888992602	0.21794945074297215	-0.6359328661643588	0.5248201798427972	0.998665554108594	SAMD11	ENST00000342066.7	84	2046	2551	2129
ENSG00000188976.10	64.71505092096959	0.23641488396137644	0.23672336173346936	0.9986968849638075	0.31794155013429237	0.9896696262630528	NOC2L	ENST00000327044.6	51	2250	2790	2300
ENSG00000187961.13	19.23498436522278	0.043619714311820074	0.41165258048331865	0.10596244595529183	0.9156121481743501	0.998665554108594	KLHL17	ENST00000338591.7	108	1929	2560	2036
ENSG00000187583.10	0.11472017899506465	0.10883371621799334	4.080472856796901	0.026671839278800125	0.9787214741389535	NA	PLEKHN1	ENST00000379410.7	36	1836	2404	1871
ENSG00000187642.9	0.16707677228520101	0.10883426093833813	4.0208191991403215	0.027067683362039168	0.9784057502528954	NA	PERM1	ENST00000433179.3	1	2373	3340	2373
ENSG00000188290.10	34.20744414105951	0.3038013529247951	0.3122412986544462	0.9729697968653676	0.3305683134183628	0.9930343427594474	HES4	ENST00000428771.6	200	744	1040	943
ENSG00000187608.9	0.8481190118884259	0.2045053057211076	1.886318043970394	0.10841507155954308	0.9136664462266555	NA	ISG15	ENST00000379389.4	152	498	711	649
ENSG00000188157.14	133.78143504851468	1.0717625744526544	0.18281330755492614	5.862606988447184	4.5565582743222124e-9	2.0167326922150114e-6	AGRN	ENST00000379370.6	51	6138	7323	6188
ENSG00000237330.2	0	NA	NA	NA	NA	NA	RNF223	ENST00000453464.2	302	750	1902	1051
ENSG00000131591.17	8.052330407692121	-0.33002188434782165	0.6218001891649938	-0.5307523061242602	0.595590434312293	0.998665554108594	C1orf159	ENST00000379339.5	212	1143	2429	1354
ENSG00000162571.13	0.19849710308500057	-1.814722921847541	3.7520098932356833	-0.48366688081479126	0.628622301344521	NA	TTLL10	ENST00000379290.5	174	2022	2283	2195
ENSG00000186891.13	0.11472017899506465	0.10883371621799334	4.080472856796901	0.026671839278800125	0.9787214741389535	NA	TNFRSF18	ENST00000328596.10	1	768	851	768
ENSG00000186827.10	0.11472017899506465	0.10883371621799334	4.080472856796901	0.026671839278800125	0.9787214741389535	NA	TNFRSF4	ENST00000379236.3	6	834	1068	839
ENSG00000078808.16	34.11908401010438	0.6872841284269526	0.3128166909065995	2.1970826634444554	0.02801454303015969	0.4910588809959873	SDF4	ENST00000360001.10	264	1089	1956	1352
ENSG00000176022.5	5.938121121564002	0.1922702496729325	0.7485264491819865	0.25686500441374055	0.7972829867697548	NA	B3GALT6	ENST00000379198.4	21	990	2783	1010
ENSG00000184163.3	1.116935954688702	0.7171022417125991	1.7589269814099595	0.40769301357681625	0.6834990672788206	NA	C1QTNF12	ENST00000330388.2	33	909	1036	941
ENSG00000160087.20	47.3099765021062	0.26818776477037704	0.26207268998135863	1.023333506400279	0.3061501866373032	0.9896696262630528	UBE2J2	ENST00000400930.8	169	828	1021	996
ENSG00000162572.20	5.384763989022985	1.060761001227967	0.7842719922597097	1.3525422451611642	0.17620191403051946	NA	SCNN1D	ENST00000379116.9	227	2409	3044	2635
ENSG00000131584.18	107.09981474732328	0.33395313355229783	0.1835921706872634	1.8189944173663262	0.06891228179123166	0.7243309336018996	ACAP3	ENST00000354700.9	204	2505	3896	2708
ENSG00000169972.11	11.498848253420483	0.517049740422757	0.5510771394459183	0.9382529294222325	0.34811444337584346	0.9954514406987122	PUSL1	ENST00000379031.9	78	912	1287	989
ENSG00000127054.20	69.80412012577163	0.023641112072828672	0.23745935479178024	0.09955856274249011	0.9206947924578023	0.998665554108594	INTS11	ENST00000540437.5	535	1821	2629	2355
ENSG00000224051.6	12.768542449556735	-0.07414116042562659	0.4831115483277683	-0.15346592455149782	0.8780308602231158	0.998665554108594	CPTP	ENST00000343938.8	412	645	2190	1056
ENSG00000169962.4	1.2253533309838578	2.1352273797547725	1.7272582526748406	1.2361946318381452	0.2163862256268388	NA	TAS1R3	ENST00000339381.5	33	2559	3433	2591
ENSG00000107404.19	26.483294320259112	-0.21755250638260315	0.35337968893575333	-0.6156338725572753	0.5381361902083075	0.998665554108594	DVL1	ENST00000378888.9	286	2088	3239	2373
ENSG00000162576.16	1.915784453141694	0.3072856812280294	1.3401260353047966	0.2292961058383891	0.8186387799545609	NA	MXRA8	ENST00000445648.5	40	1353	2001	1392
ENSG00000175756.13	75.5714080027417	0.022768247700130813	0.2131364368335015	0.1068247552525098	0.9149280079948722	0.998665554108594	AURKAIP1	ENST00000338370.7	402	600	1072	1001
ENSG00000221978.11	76.03424666698669	0.4590901024600153	0.21428031689796234	2.142474442384871	0.0321553231434936	0.5278988065859722	CCNL2	ENST00000400809.7	7	1563	2305	1569
ENSG00000242485.5	45.14554726773489	0.1965866493841449	0.27727481004492743	0.708995704847085	0.4783271422483074	0.998665554108594	MRPL20	ENST00000344843.11	97	450	721	546
ENSG00000235098.8	0.7096898980863403	-0.45068640202305005	2.2632842307889924	-0.19912938723826942	0.8421615338381796	NA	ANKRD65	ENST00000537107.5	313	1200	2190	1512
ENSG00000205116.3	0.8974580748443094	-0.8278979784237445	3.936374166384679	-0.21031993998276807	0.8334179734686309	NA	TMEM88B	ENST00000378821.3	1	492	492	492
ENSG00000179403.11	1.307721661780924	1.0825596258636583	1.5917487504212229	0.6801070995514723	0.4964366494597461	NA	VWA1	ENST00000476993.1	79	1338	4511	1416
ENSG00000215915.9	0.11472017899506465	0.10883371621799334	4.080472856796901	0.026671839278800125	0.9787214741389535	NA	ATAD3C	ENST00000378785.6	996	1236	3859	2231
ENSG00000160072.19	4.872125925336914	0.21064443840696737	0.8073305987232479	0.2609147216023904	0.7941582717731379	NA	ATAD3B	ENST00000308647.7	117	1947	2448	2063
ENSG00000197785.13	10.640723770532023	-0.07061799174210767	0.5283830526962952	-0.1336492368211847	0.8936799480588568	0.998665554108594	ATAD3A	ENST00000378755.9	95	1905	2612	1999
ENSG00000205090.8	6.0516258094790585	0.5030050386509989	0.7312761032660076	0.6878455844577581	0.49155002670749715	NA	TMEM240	ENST00000378733.8	12	522	718	533
ENSG00000160075.11	36.571810098973046	0.2513350670380512	0.30273754011266135	0.8302077996158616	0.4064213061786057	0.998665554108594	SSU72	ENST00000291386.3	313	585	1290	897
ENSG00000228594.3	2.713319477138019	-0.4079575367971738	1.0773232383287488	-0.3786770045265506	0.7049277315731854	NA	FNDC10	ENST00000422725.3	82	681	2085	762
ENSG00000197530.12	37.22762380770862	0.1931973113968535	0.29653945115733676	0.651506268871954	0.5147197317036689	0.998665554108594	MIB2	ENST00000505820.6	18	3213	3305	3230
ENSG00000189409.13	0	NA	NA	NA	NA	NA	MMP23B	ENST00000356026.9	125	1173	1326	1297
ENSG00000248333.8	21.73040245429043	0.22534855520769403	0.38096522154834006	0.5915200193125764	0.5541720456412023	0.998665554108594	CDK11B	ENST00000407249.7	113	2388	2677	2500
ENSG00000189339.11	16.163531230996707	0.01572952501345516	0.43674049789201985	0.03601572350028355	0.9712698215478082	0.998665554108594	SLC35E2B	ENST00000617444.4	762	1218	6283	1979
ENSG00000008128.22	11.415827774747488	-0.12045689127228691	0.5320858217528949	-0.22638620753970795	0.8209010542850403	0.998665554108594	CDK11A	ENST00000378633.5	81	2352	2458	2432
ENSG00000215790.7	2.8660775980310627	0.6828411038579537	1.0702662401278749	0.6380105045417187	0.5234668421182704	NA	SLC35E2A	ENST00000643905.1	424	801	6293	1224
ENSG00000008130.15	26.798280651503482	-0.05644695637566229	0.34199463381449535	-0.1650521698135189	0.8689029195319361	0.998665554108594	NADK	ENST00000378625.5	206	1776	3653	1981
ENSG00000078369.17	660.704379637485	-0.02110899739055331	0.10548876707509063	-0.20010658931606604	0.8413972200638878	0.998665554108594	GNB1	ENST00000610897.4	345	1023	3145	1367
ENSG00000169885.9	0	NA	NA	NA	NA	NA	CALML6	ENST00000307786.7	455	546	1101	1000
ENSG00000178821.12	0.3132172820800652	-0.8529414095629032	2.9792353811423258	-0.2862954081982809	0.7746518747375544	NA	TMEM52	ENST00000310991.7	9	630	929	638
ENSG00000142609.18	0.6332158436149619	0.5674305800703092	2.345285651931439	0.2419451888954366	0.8088226344249824	NA	NA	NA	NA	NA	NA	NA
ENSG00000187730.8	0.9765856475447748	1.7425765077042386	1.8273186281954887	0.9536248800927868	0.34027355713082225	NA	GABRD	ENST00000378585.6	127	1359	1961	1485
ENSG00000067606.16	44.200954498655236	-0.03936902451804167	0.2723507696216061	-0.1445526464740287	0.8850640870651283	0.998665554108594	PRKCZ	ENST00000378567.7	162	1779	2326	1940
ENSG00000162585.16	11.20050940970292	-0.003802137638309616	0.5161898018980801	-0.007365774419271334	0.9941230154548278	0.998665554108594	FAAP20	ENST00000400919.7	27	570	1413	596
ENSG00000157933.9	30.264817154256512	0.15503302368137778	0.3291377250132948	0.4710278157118439	0.6376208714280216	0.998665554108594	SKI	ENST00000378536.4	73	2187	5613	2259
ENSG00000116151.13	14.501636605934777	-0.645892087065516	0.5000138783691744	-1.2917483194109176	0.1964443180581659	0.9291811678490309	MORN1	ENST00000378531.7	175	1494	1798	1668
ENSG00000157916.19	18.650050822779814	0.27252224841800166	0.41510427671145445	0.6565151546425434	0.5114927200225994	0.998665554108594	RER1	ENST00000605895.5	134	591	3044	724
ENSG00000157911.10	8.195402470142943	0.14413991315628374	0.62938705735649	0.22901632861929302	0.818856224966242	0.998665554108594	PEX10	ENST00000288774.7	29	1041	2871	1069
ENSG00000149527.17	29.859991455899465	0.35154152638257286	0.35512516145721534	0.9899088111359459	0.3222186923905143	0.9896696262630528	PLCH2	ENST00000378486.7	275	4251	4837	4525
ENSG00000157881.13	33.34273367157877	-0.20511735608460874	0.30568499330888194	-0.6710089162844386	0.5022148494508536	0.998665554108594	PANK4	ENST00000378466.7	18	2346	2677	2363
ENSG00000197921.5	2.668414341410246	-0.42510435151016635	1.1433538744093337	-0.37180470633361773	0.7100382593549708	NA	HES5	ENST00000378453.3	82	501	1306	582
ENSG00000157873.17	0.28179695128026566	1.1586086705226502	3.0338809567996927	0.3818899577868788	0.7025429893180182	NA	TNFRSF14	ENST00000355716.4	300	852	1707	1151
ENSG00000157870.15	28.185308599478162	-0.1271848011767144	0.33884388554714795	-0.3753492584685211	0.7074007365876843	0.998665554108594	PRXL2B	ENST00000444521.6	47	741	2827	787
ENSG00000142606.15	1.1470162417160816	-1.8354544849048713	1.7665673074916657	-1.0389949350478007	0.2988070918666301	NA	MMEL1	ENST00000378412.7	163	2340	2849	2502
ENSG00000215912.12	0.19849710308500057	-1.814722921847541	3.7520098932356833	-0.48366688081479126	0.628622301344521	NA	TTC34	ENST00000637179.1	75	1701	1775	1775
ENSG00000169717.6	0	NA	NA	NA	NA	NA	ACTRT2	ENST00000378404.3	205	1134	1421	1338
ENSG00000142611.16	1.9099942504907572	0.20216758808875038	1.2535385482574313	0.16127751984156175	0.8718748280405824	NA	PRDM16	ENST00000270722.9	50	3831	8690	3880
ENSG00000130762.14	0.16707677228520101	0.10883426093833813	4.0208191991403215	0.027067683362039168	0.9784057502528954	NA	ARHGEF16	ENST00000378378.8	406	2130	3061	2535
ENSG00000162591.15	1.4146136956917865	-2.1969607820266424	1.6006388518766228	-1.3725524526977957	0.16989152190470114	NA	MEGF6	ENST00000356575.8	228	4626	5455	4853
ENSG00000158109.14	34.617443827097354	0.3036891260584525	0.30640210552319924	0.991145689223923	0.32161444582092535	0.9896696262630528	TPRG1L	ENST00000378344.6	72	819	2414	890
ENSG00000116213.15	14.792094544627506	0.436412026107387	0.47014677742199484	0.9282463414944815	0.35327980098285555	0.9954514406987122	WRAP73	ENST00000270708.11	75	1383	1665	1457
ENSG00000078900.14	0.5756869079113772	0.6398445840657732	2.1769383261465234	0.2939194814941703	0.7688194311975901	NA	TP73	ENST00000378295.8	156	1911	5188	2066
ENSG00000162592.9	0.19849710308500057	-1.814722921847541	3.7520098932356833	-0.48366688081479126	0.628622301344521	NA	CCDC27	ENST00000294600.6	85	1971	2176	2055
ENSG00000235169.8	0	NA	NA	NA	NA	NA	SMIM1	ENST00000444870.7	250	237	547	486
ENSG00000130764.9	108.24474246083807	-0.24458700505368558	0.18165966977069942	-1.3464023432521728	0.17817279565340918	0.9215030712740818	LRRC47	ENST00000378251.2	29	1752	4310	1780
ENSG00000116198.12	29.887987676233383	-0.13941499630732088	0.3313859356357577	-0.4207028160077338	0.67397210460169	0.998665554108594	CEP104	ENST00000378230.7	326	2778	6424	3103
ENSG00000169598.15	5.0044892555794656	1.7996891464066367	0.8952613449850679	2.0102388609626094	0.0444059142515443	NA	DFFB	ENST00000338895.7	338	1089	3105	1426
ENSG00000198912.10	12.36889207053878	0.4409010704654158	0.5109736252946485	0.8628646345712542	0.3882118970576434	0.998665554108594	C1orf174	ENST00000361605.3	100	732	1666	831
ENSG00000196581.10	5.947907255936414	-0.4973171120012855	0.7236022556145235	-0.6872796597060576	0.49190651399588303	NA	AJAP1	ENST00000378191.4	382	1236	11666	1617
ENSG00000131697.17	23.357253186433258	0.9089557900075612	0.3818762595658213	2.380236443713493	0.01730153258452935	0.3612102982034288	NPHP4	ENST00000378156.8	267	4281	4994	4547
ENSG00000069424.14	31.11151537422243	0.23813673892705348	0.31980625617003067	0.7446281438610878	0.45649654924073396	0.998665554108594	KCNAB2	ENST00000378083.7	290	1248	4142	1537
ENSG00000116254.17	70.6053593534275	-0.40692913676269477	0.24024300937105905	-1.693823007911903	0.0902989206823989	0.7772181726888333	CHD5	ENST00000262450.7	101	5865	9646	5965
ENSG00000285629.1	0	NA	NA	NA	NA	NA	NA	NA	NA	NA	NA	NA
ENSG00000116251.10	40.83464842115762	0.10247819904982067	0.5558539972387716	0.18436172008996154	0.8537296979817001	0.998665554108594	RPL22	ENST00000234875.8	40	387	2078	426
ENSG00000158286.12	8.740999047770785	-0.4584520677146914	0.6045392595016671	-0.7583495372866303	0.44824175895302226	0.998665554108594	RNF207	ENST00000377939.4	128	1905	3924	2032
ENSG00000116237.15	10.917939799388762	1.2485740995715264	0.5755195178463006	2.169473077548993	0.030046786164113083	0.5129945555364205	ICMT	ENST00000343813.9	30	855	4771	884
ENSG00000173673.7	0	NA	NA	NA	NA	NA	HES3	ENST00000377898.3	66	561	697	626
ENSG00000158292.6	17.24868004105994	-0.2796935250832618	0.42566360328455566	-0.6570764399987634	0.511131767038187	0.998665554108594	GPR153	ENST00000377893.2	261	1830	4082	2090
ENSG00000097021.19	263.0118079170083	-0.35640249505972055	0.13836628329172376	-2.575790044951207	0.010001135395874815	0.25198208748423884	ACOT7	ENST00000377855.6	148	1143	1614	1290
ENSG00000069812.11	0.41720853474809844	-0.0013106107454512218	2.693865377867875	-4.865167933850267e-4	0.9996118157773005	NA	HES2	ENST00000377834.8	100	522	4262	621
ENSG00000187017.16	0.5740334566009389	-3.1523638365131057	2.362392143351317	-1.3343948189910273	0.18207449711507523	NA	ESPN	ENST00000645284.1	181	2565	3543	2745
ENSG00000215788.10	3.4842777751744363	-0.19060436885035528	0.9377864221416831	-0.20324923068843315	0.8389402352553398	NA	TNFRSF25	ENST00000377782.7	69	1281	1632	1349
ENSG00000171680.21	23.723593733060316	-0.2365559743884863	0.36364103660070246	-0.6505205699549184	0.5153560190972004	0.998665554108594	PLEKHG5	ENST00000537245.5	66	3258	4794	3323
ENSG00000162408.10	44.174136296266106	-0.48725320250598403	0.2728510241835292	-1.7857847664820947	0.07413411417573347	0.7348658215941687	NOL9	ENST00000377705.5	34	2109	6649	2142
ENSG00000173662.20	0.2294403579901293	0.9544283611678432	3.5363014242657567	0.2698945159534899	0.7872414063075179	NA	TAS1R1	ENST00000333172.10	194	2526	2892	2719
ENSG00000204859.12	17.44771258342125	-0.19757594408217025	0.42621270141805634	-0.46356183995646644	0.6429616996413308	0.998665554108594	ZBTB48	ENST00000377674.8	159	2067	2293	2225
ENSG00000162413.16	12.969350314754896	-1.1467696891153125	0.5041538439752219	-2.274642359310611	0.022927392859466433	0.4326438574922219	KLHL21	ENST00000377658.8	53	1794	4487	1846
ENSG00000116273.5	34.37635978382153	0.17913824487520394	0.30186189354680615	0.5934443820330276	0.5528837942002223	0.998665554108594	PHF13	ENST00000377648.4	383	903	3681	1285
ENSG00000041988.15	15.158354580132956	0.2563224922415658	0.48904056461603124	0.5241333966698992	0.6001857615550278	0.998665554108594	THAP3	ENST00000054650.8	159	720	1366	878
ENSG00000007923.15	65.93308275963298	-0.020659659313341645	0.23107610080743976	-0.08940630052675912	0.9287590164301258	0.998665554108594	DNAJC11	ENST00000377577.9	125	1680	3311	1804
ENSG00000171735.18	68.08261951563767	-0.5086361689011792	0.22803289258197168	-2.2305385996817906	0.025711707873295315	0.46735120758605775	CAMTA1	ENST00000303635.11	208	5022	8444	5229
ENSG00000049245.12	2.467738390994656	1.5439681868662487	1.2751936367493635	1.2107715584293746	0.2259829684349737	NA	VAMP3	ENST00000054666.10	116	303	2205	418
ENSG00000049246.14	2.3341234481762534	-0.1417085989640306	1.173939585824544	-0.1207120031347254	0.9039191513960689	NA	PER3	ENST00000613533.4	265	3633	6318	3897
ENSG00000049247.13	0.3965171302753303	1.6744132097879647	2.6623459242490095	0.6289239856237993	0.5293988223385659	NA	UTS2	ENST00000054668.5	1	420	420	420
ENSG00000049249.8	0.3024883557530338	-0.852941344952721	3.013398577298713	-0.2830496275462237	0.7771387945328347	NA	TNFRSF9	ENST00000615230.4	262	768	5970	1029
ENSG00000116288.12	114.90895977650044	0.3059194497399237	0.17774261166408517	1.7211373619179133	0.08522590093940097	0.762855246733271	PARK7	ENST00000493678.5	68	570	1088	637
ENSG00000116285.12	28.564843472089592	-0.06715811472962635	0.3461938347241164	-0.19398992123341824	0.8461837736895225	0.998665554108594	ERRFI1	ENST00000377482.9	225	1389	3104	1613
ENSG00000162426.14	19.441960962964796	0.29257444295875745	0.4131790094252002	0.7081057756679763	0.4788795731941545	0.998665554108594	SLC45A1	ENST00000471889.5	284	2349	2784	2632
ENSG00000142599.17	356.9534141164479	-0.18011008877078238	0.13415683173264167	-1.342533857162936	0.1794229601673245	0.9224160808819619	RERE	ENST00000337907.7	636	4701	8026	5336
ENSG00000074800.15	292.51838448750146	-0.07641800560656899	0.13237177735029365	-0.5772983270017222	0.5637379436551686	0.998665554108594	ENO1	ENST00000646539.1	681	1305	2345	1985
ENSG00000131686.14	0	NA	NA	NA	NA	NA	CA6	ENST00000377436.6	1	942	942	942
ENSG00000197241.3	0	NA	NA	NA	NA	NA	SLC2A7	ENST00000400906.1	1	1539	1539	1539
ENSG00000142583.17	0	NA	NA	NA	NA	NA	SLC2A5	ENST00000377424.8	181	1506	4165	1686
ENSG00000180758.11	0.16707677228520101	0.10883426093833813	4.0208191991403215	0.027067683362039168	0.9784057502528954	NA	GPR157	ENST00000377411.4	144	1008	5265	1151
ENSG00000049239.12	3.427539572526233	-0.2630568105192603	0.9258304819115083	-0.2841306434155659	0.7763102642249086	NA	H6PD	ENST00000602477.1	153	2409	5590	2561
ENSG00000171621.13	6.278549748281	-0.37326175302690773	0.6901157678841865	-0.5408683157193818	0.5885983510936464	0.998665554108594	SPSB1	ENST00000328089.10	342	822	3120	1163
ENSG00000171612.6	3.629660791626554	-0.4095002642146305	0.9142676325615255	-0.4478997720474078	0.6542255329167822	NA	SLC25A33	ENST00000302692.6	211	966	3854	1176
ENSG00000188807.12	25.11638531437018	-0.2887595621065314	0.34842979489075254	-0.8287453206952917	0.4072485347998832	0.998665554108594	TMEM201	ENST00000340381.10	10	2001	3776	2010
ENSG00000171608.15	11.577649863720763	-0.8020862045721059	0.5093232151779262	-1.5748078639845746	0.11530080068537159	0.8291167243435493	PIK3CD	ENST00000377346.8	196	3135	5203	3330
ENSG00000171603.17	186.71397420380575	0.3944820768005349	0.16857185415372813	2.340142005205621	0.01927640893260225	0.3904685855180667	CLSTN1	ENST00000377298.8	794	2946	5221	3739
ENSG00000178585.14	13.637121799278388	0.4420828272842399	0.48256313518583893	0.9161139653031934	0.359607123792287	0.9979138338193877	CTNNBIP1	ENST00000377263.5	313	246	3000	558
ENSG00000162441.11	25.1013290460958	0.07469188686904704	0.3705765375330154	0.20155589818579	0.8402639256854866	0.998665554108594	LZIC	ENST00000377223.5	249	573	2281	821
ENSG00000173614.13	2.928103491323886	0.9488239694127643	1.0752245116019623	0.8824426519063674	0.3775374792427759	NA	NMNAT1	ENST00000377205.5	145	840	3781	984
ENSG00000162444.11	0.16707677228520101	0.10883426093833813	4.0208191991403215	0.027067683362039168	0.9784057502528954	NA	RBP7	ENST00000294435.7	44	405	636	448
ENSG00000130939.18	79.69852687123392	0.05090716085617344	0.20824940123298902	0.24445285582943216	0.8068801100894775	0.998665554108594	UBE4B	ENST00000343090.10	76	3909	5267	3984
ENSG00000054523.17	449.8320831118901	-0.3156076775424627	0.10992362584940661	-2.871154177308885	0.004089759998151563	0.13804749436617722	KIF1B	ENST00000263934.10	154	5313	6816	5466
ENSG00000142657.20	269.55803823922116	-0.0028733109332797335	0.1266812726817086	-0.022681418274815048	0.9819043980919342	0.998665554108594	PGD	ENST00000270776.12	39	1452	1885	1490
ENSG00000251503.8	0	NA	NA	NA	NA	NA	CENPS-CORT	ENST00000400900.6	417	495	1469	911
ENSG00000175279.21	0	NA	NA	NA	NA	NA	CENPS	ENST00000309048.7	76	417	896	492
ENSG00000241563.3	0.11472017899506465	0.10883371621799334	4.080472856796901	0.026671839278800125	0.9787214741389535	NA	CORT	ENST00000377049.3	506	318	1130	823
ENSG00000160049.11	26.91589780588495	-0.009469281162394027	0.3406248753947575	-0.027799734682970152	0.977821877574325	0.998665554108594	DFFA	ENST00000377038.7	69	996	6032	1064
ENSG00000142655.12	30.698363802014168	0.14805560742724874	0.32198941156770877	0.45981514331913126	0.6456489126775309	0.998665554108594	PEX14	ENST00000356607.8	81	1134	1985	1214
ENSG00000130940.14	123.20396196759606	0.3867853248489947	0.17699539668795605	2.1852846576055285	0.028867981609034726	0.5020419905759831	CASZ1	ENST00000377022.7	319	5280	7936	5598
ENSG00000175262.14	0	NA	NA	NA	NA	NA	C1orf127	ENST00000377004.8	1	2472	2761	2472
ENSG00000120948.17	9.354690863700313	-3.3129317059191425	0.7385586152507325	-4.485672006946177	7.268448155205063e-6	0.001100532450283506	TARDBP	ENST00000240185.7	357	1245	5367	1601
ENSG00000277726.4	0.3755363535159382	-2.565469269151976	2.9484801556472364	-0.8700988759372594	0.3842463719330909	NA	NA	NA	NA	NA	NA	NA
ENSG00000009724.16	0.47984101372198984	-0.14817469615208015	2.5820474611353514	-0.057386511434195826	0.9542373076113861	NA	MASP2	ENST00000400897.7	17	2061	2439	2077
ENSG00000116649.9	43.43426759169777	0.6894708454517278	0.28092063187822613	2.454326123510218	0.01411489070031398	0.31955246158357886	SRM	ENST00000376957.6	82	909	1266	990
ENSG00000171824.13	75.56112861955539	-0.40180323170228505	0.21424469693021397	-1.8754407341674582	0.06073211565438057	0.6948857867104615	EXOSC10	ENST00000376936.8	51	2658	2808	2708
ENSG00000198793.12	90.91398059616748	-0.005408221268452096	0.19684362535419056	-0.0274747087121608	0.9780811117546352	0.998665554108594	MTOR	ENST00000361445.8	78	7650	8677	7727
ENSG00000171819.4	0.09539285354611099	0.10883371621799316	4.080472856796901	0.02667183927880008	0.9787214741389535	NA	ANGPTL7	ENST00000376819.3	240	1041	2238	1280
ENSG00000120942.13	10.480182147892018	0.48965873850415137	0.5831889488929318	0.8396228005240344	0.40111991110171563	0.998665554108594	UBIAD1	ENST00000376810.5	327	1017	3646	1343
ENSG00000204624.7	76.73041927494566	0.24247535200233464	0.21441230804418795	1.1308835496158327	0.25810410804536243	0.9579612429423683	DISP3	ENST00000294484.6	139	4179	5215	4317
ENSG00000116661.10	21.15073350855666	0.11470990427685962	0.387775000026025	0.29581562573441045	0.767370889172701	0.998665554108594	FBXO2	ENST00000354287.4	343	891	1560	1233
ENSG00000132879.13	64.61612725850094	-0.20924431378955477	0.2294845922201134	-0.9118011443175894	0.3618734078807314	0.9979138338193877	FBXO44	ENST00000376768.5	103	771	959	873
ENSG00000116663.10	2.8664861244052835	0.36416408536995	1.0319170419991701	0.35290054388911124	0.7241630030688244	NA	FBXO6	ENST00000376753.8	136	882	1520	1017
ENSG00000116670.14	49.30289603336766	0.0032346350350266487	0.26334733704017776	0.012282771002666924	0.9902000130686096	0.998665554108594	MAD2L2	ENST00000235310.7	930	636	1860	1565
ENSG00000162490.6	60.44483234014638	0.18635552113490425	0.2509437886727565	0.7426185845066735	0.45771263364146964	0.998665554108594	DRAXIN	ENST00000294485.5	136	1050	7346	1185
ENSG00000177674.15	0.1877681767579691	-1.8147221247558167	3.8342613253018007	-0.47329119504210554	0.6360054430717719	NA	AGTRAP	ENST00000314340.9	55	480	1107	534
ENSG00000215910.7	0.4695651280382348	0.16690415576215278	2.46035376802812	0.06783746221012767	0.9459150219049038	NA	NA	NA	NA	NA	NA	NA
ENSG00000177000.12	30.799337337545207	-0.05855190589423181	0.35617909867688946	-0.1643889439659333	0.869424966612099	0.998665554108594	MTHFR	ENST00000376585.6	1053	2094	8094	3146
ENSG00000011021.22	48.75567293870674	-0.11932243170877313	0.27441210759179585	-0.43482932570261174	0.6636863169717038	0.998665554108594	CLCN6	ENST00000346436.10	53	2610	5583	2662
ENSG00000175206.10	0	NA	NA	NA	NA	NA	NPPA	ENST00000376480.7	100	456	855	555
ENSG00000120937.8	1.125602903331074	-0.5457172618181284	1.6850723645121237	-0.32385390284181004	0.7460486448589614	NA	NPPB	ENST00000376468.3	99	405	694	503
ENSG00000116685.15	4.368929865594208	0.13609400926172596	0.8539446469732164	0.1593709964036984	0.873376588350248	NA	KIAA2013	ENST00000376572.7	187	1905	2815	2091
ENSG00000083444.16	11.222201010162523	1.1021832546605688	0.5647611662247118	1.9515917888412728	0.050986688893667774	0.648468635182108	PLOD1	ENST00000196061.4	28	2184	2940	2211
ENSG00000116688.16	91.74097072535534	0.054567698450244735	0.2011097347096814	0.27133295426508186	0.78613496294849	0.998665554108594	MFN2	ENST00000235329.9	323	2274	4539	2596
ENSG00000116691.10	23.347194411666628	-0.35742161584412896	0.36004013484884934	-0.9927271469170522	0.32084294170387023	0.9896696262630528	MIIP	ENST00000235332.5	170	1167	1573	1336
ENSG00000120949.14	0.09539285354611099	0.10883371621799316	4.080472856796901	0.02667183927880008	0.9787214741389535	NA	TNFRSF8	ENST00000263932.6	223	1788	3686	2010
ENSG00000028137.18	0	NA	NA	NA	NA	NA	TNFRSF1B	ENST00000376259.6	90	1386	3683	1475
ENSG00000048707.15	33.073778108322834	0.05710832358170489	0.32652743010935154	0.1748959453806982	0.8611613962885629	0.998665554108594	VPS13D	ENST00000620676.6	168	13167	16357	13334
ENSG00000162496.8	5.376453810950127	1.0910067543671775	0.859294028998432	1.2696547602440844	0.20420763416291365	NA	DHRS3	ENST00000616661.4	384	909	1722	1292
ENSG00000204518.2	0	NA	NA	NA	NA	NA	AADACL4	ENST00000376221.1	1	1224	1575	1224
ENSG00000188984.11	0	NA	NA	NA	NA	NA	AADACL3	ENST00000359318.7	35	1224	3662	1258
ENSG00000157330.9	0.11472017899506465	0.10883371621799334	4.080472856796901	0.026671839278800125	0.9787214741389535	NA	C1orf158	ENST00000614859.4	217	585	3549	801
ENSG00000116726.4	0.4037754856248325	-0.852941821502808	2.7514621128141026	-0.3099958445840448	0.7565641163553191	NA	PRAMEF12	ENST00000357726.4	28	1452	1786	1479
ENSG00000116721.9	0.28905530662976786	-1.8147273456729796	3.257988198284016	-0.5570085694689739	0.5775215742398907	NA	PRAMEF1	ENST00000332296.7	104	1425	2160	1528
ENSG00000239810.3	0	NA	NA	NA	NA	NA	PRAMEF11	ENST00000619922.1	72	1437	1845	1508
ENSG00000179172.9	0	NA	NA	NA	NA	NA	HNRNPCL1	ENST00000317869.6	227	882	1108	1108
ENSG00000120952.4	0.11472017899506465	0.10883371621799334	4.080472856796901	0.026671839278800125	0.9787214741389535	NA	PRAMEF2	ENST00000240189.2	88	1425	1642	1512
ENSG00000243073.3	0	NA	NA	NA	NA	NA	PRAMEF4	ENST00000235349.5	72	1437	1828	1508
ENSG00000187545.5	0.09539285354611099	0.10883371621799316	4.080472856796901	0.02667183927880008	0.9787214741389535	NA	PRAMEF10	ENST00000235347.4	81	1425	1525	1505
ENSG00000204510.5	0	NA	NA	NA	NA	NA	PRAMEF7	ENST00000616979.4	99	1425	1592	1523
ENSG00000232423.6	0	NA	NA	NA	NA	NA	PRAMEF6	ENST00000415464.6	87	1431	1720	1517
ENSG00000274764.5	0	NA	NA	NA	NA	NA	PRAMEF27	ENST00000436041.5	95	1437	1863	1531
ENSG00000277058.2	0	NA	NA	NA	NA	NA	HNRNPCL3	ENST00000617807.2	244	882	1148	1125
ENSG00000229571.7	0	NA	NA	NA	NA	NA	PRAMEF25	ENST00000614839.4	95	1437	1863	1531
ENSG00000275774.2	0.11472017899506465	0.10883371621799334	4.080472856796901	0.026671839278800125	0.9787214741389535	NA	HNRNPCL2	ENST00000621994.2	244	882	1148	1125
ENSG00000280267.4	0	NA	NA	NA	NA	NA	PRAMEF26	ENST00000624207.1	95	1437	1863	1531
ENSG00000179412.10	0	NA	NA	NA	NA	NA	HNRNPCL4	ENST00000323770.7	1	882	882	882
ENSG00000204505.4	0	NA	NA	NA	NA	NA	PRAMEF9	ENST00000415919.2	95	1437	1863	1531
ENSG00000279169.2	0	NA	NA	NA	NA	NA	NA	NA	NA	NA	NA	NA
ENSG00000279804.2	0.11472017899506465	0.10883371621799334	4.080472856796901	0.026671839278800125	0.9787214741389535	NA	NA	NA	NA	NA	NA	NA
ENSG00000270601.4	0	NA	NA	NA	NA	NA	PRAMEF5	ENST00000622421.2	87	1431	1720	1517
ENSG00000182330.10	0	NA	NA	NA	NA	NA	PRAMEF8	ENST00000357367.6	84	1425	1844	1508
ENSG00000237700.2	0	NA	NA	NA	NA	NA	NA	NA	NA	NA	NA	NA
ENSG00000204501.7	0	NA	NA	NA	NA	NA	PRAMEF15	ENST00000376152.2	95	1437	1865	1531
ENSG00000204481.7	0	NA	NA	NA	NA	NA	PRAMEF14	ENST00000334600.6	104	1425	1690	1528
ENSG00000204480.8	0	NA	NA	NA	NA	NA	NA	NA	NA	NA	NA	NA
ENSG00000204479.4	0	NA	NA	NA	NA	NA	PRAMEF17	ENST00000376098.4	27	1425	1578	1451
ENSG00000204478.9	0.16707677228520101	0.10883426093833813	4.0208191991403215	0.027067683362039168	0.9784057502528954	NA	PRAMEF20	ENST00000316412.9	100	1428	1597	1527
ENSG00000162494.5	0	NA	NA	NA	NA	NA	LRRC38	ENST00000376085.3	456	885	2209	1340
ENSG00000162493.16	0.3248332115362403	1.4517065836747587	2.8433479267708344	0.5105624148232359	0.6096574996289457	NA	PDPN	ENST00000294489.10	342	717	3104	1058
ENSG00000116731.22	103.19437191596809	-0.24444436215596552	0.18931480922733207	-1.2912057073275924	0.19663235658782002	0.9291811678490309	PRDM2	ENST00000235372.11	857	5157	7957	6013
ENSG00000189337.16	40.55674203424071	0.005331249807509941	0.30701175871307335	0.0173649694391426	0.9861454552774255	0.998665554108594	KAZN	ENST00000376030.6	295	2328	6030	2622
ENSG00000171729.13	0.8941728024786534	1.6403844749603993	1.953340572019998	0.8397841617880476	0.4010294153048625	NA	TMEM51	ENST00000428417.5	447	762	1942	1208
ENSG00000142621.19	2.385770868249123	-2.38104953266385	1.3317917636529508	-1.7878542258985792	0.07379952956872093	NA	NA	NA	NA	NA	NA	NA
ENSG00000142634.12	6.893723672631512	-0.01833643040803474	0.6837341999935707	-0.02681806820282964	0.9786048420587207	0.998665554108594	EFHD2	ENST00000375980.8	78	723	2419	800
ENSG00000162438.11	0	NA	NA	NA	NA	NA	CTRC	ENST00000375949.4	27	807	898	833
ENSG00000142615.7	0.11472017899506465	0.10883371621799334	4.080472856796901	0.026671839278800125	0.9787214741389535	NA	CELA2A	ENST00000359621.4	26	810	919	835
ENSG00000215704.9	0	NA	NA	NA	NA	NA	CELA2B	ENST00000375910.7	26	810	923	835
ENSG00000132906.17	14.740137393804858	-0.520000278202669	0.455151428600123	-1.1424775262202231	0.2532555824131357	0.9575436557009573	CASP9	ENST00000333868.9	96	1251	2019	1346
ENSG00000116138.12	19.02406323477171	0.1514325913636972	0.4026018261864175	0.37613488442940907	0.706816621298944	0.998665554108594	DNAJC16	ENST00000375847.7	165	2349	6069	2513
ENSG00000116771.5	0.357862479377423	1.5478705681019607	2.752388601283676	0.5623735570551539	0.5738615314344382	NA	AGMAT	ENST00000375826.3	144	1059	2500	1202
ENSG00000197312.11	22.226513786014756	-0.42433164754650965	0.3704463137195695	-1.1454605750719704	0.25201841793552154	0.9575436557009573	DDI2	ENST00000480945.5	172	1200	10625	1371
ENSG00000215695.1	1.1723100783130913	1.9715467941500953	1.7762891443310933	1.1099244739755088	0.2670315732465106	NA	RSC1A1	ENST00000345034.1	1	1854	1854	1854
ENSG00000116786.12	43.782506004578586	0.37374500749953593	0.2832068404126499	1.3196891959070138	0.18693880870616866	0.92529621086065	PLEKHM2	ENST00000375799.7	228	3060	4122	3287
ENSG00000162461.7	0.3755363535159382	-2.565469269151976	2.9484801556472364	-0.8700988759372594	0.3842463719330909	NA	SLC25A34	ENST00000294454.5	82	915	2986	996
ENSG00000162460.6	0	NA	NA	NA	NA	NA	TMEM82	ENST00000375782.1	139	1032	1520	1170
ENSG00000162458.12	10.420325897468544	-0.18557516023819	0.5528985482002422	-0.3356405272581411	0.7371419587771697	0.998665554108594	FBLIM1	ENST00000441801.6	208	1125	1543	1332
ENSG00000233954.6	0.29388995663111156	-0.852941290235095	3.042030946726463	-0.2803854744321215	0.779181780019977	NA	UQCRHL	ENST00000483273.2	1700	276	2180	1975
ENSG00000065526.10	102.69141090336674	-0.24723749261248704	0.19409198914977085	-1.273816058537617	0.20272861264530134	0.929319751174869	SPEN	ENST00000375759.7	205	10995	12232	11199
ENSG00000116809.11	33.45022557676854	0.5455503856303671	0.3416952946987124	1.5965990579747449	0.11035510905217914	0.8199811639123163	ZBTB17	ENST00000375733.6	240	2433	2770	2672
ENSG00000183888.4	0	NA	NA	NA	NA	NA	SRARP	ENST00000329454.2	69	510	3039	578
ENSG00000173641.17	0.16707677228520101	0.10883426093833813	4.0208191991403215	0.027067683362039168	0.9784057502528954	NA	HSPB7	ENST00000311890.13	828	513	2892	1340
ENSG00000186510.11	0	NA	NA	NA	NA	NA	CLCNKA	ENST00000331433.4	20	2064	2475	2083
ENSG00000184908.17	0	NA	NA	NA	NA	NA	CLCNKB	ENST00000375679.8	112	2064	2567	2175
ENSG00000185519.8	0.8630887632307067	-3.6794174815627305	1.9863320158910567	-1.8523678076608787	0.06397302475622327	NA	FAM131C	ENST00000375662.4	185	843	1695	1027
ENSG00000142627.12	0.262469625831312	1.0699329647788878	3.110838632493142	0.3439371472384614	0.7308935546966044	NA	EPHA2	ENST00000358432.7	156	2931	3964	3086
ENSG00000142632.16	0.3655738753702016	-0.8529416629417818	2.841297460916889	-0.3001944269033123	0.7640288558442491	NA	ARHGEF19	ENST00000270747.7	138	2409	3029	2546
ENSG00000132881.11	2.9545038735104687	-0.8743494262901238	1.004305157148405	-0.8706013506619107	0.38397185873935363	NA	CPLANE2	ENST00000375599.7	421	777	1545	1197
ENSG00000037637.10	37.63378869300972	-0.21867762910144659	0.2901556376529028	-0.7536563165560084	0.45105561868537386	0.998665554108594	FBXO42	ENST00000375592.7	218	2154	6202	2371
ENSG00000055070.16	29.567104680909907	-0.13226945844389815	0.3307953812153256	-0.39985279709150356	0.6892649408425263	0.998665554108594	SZRD1	ENST00000401088.8	176	459	3636	634
ENSG00000187144.11	0	NA	NA	NA	NA	NA	SPATA21	ENST00000335496.5	484	1410	2015	1893
ENSG00000157191.19	7.097649250703951	0.39582742381990665	0.6551240573962871	0.6042022413175847	0.545709190987393	0.998665554108594	NECAP2	ENST00000443980.6	27	822	1929	848
ENSG00000219481.10	0.4488737235654667	1.8130802882269428	2.5610335177894257	0.70794867604541	0.47897713026154193	NA	NA	NA	NA	NA	NA	NA
ENSG00000058453.16	22.392670712182507	0.3905973214524328	0.37867007883319154	1.0314977160487384	0.30230747871232455	0.9874633954101465	CROCC	ENST00000375541.9	70	6054	6656	6123
ENSG00000117122.13	4.951758379763664	-1.3419012132142936	0.8203869723602197	-1.6356929820005537	0.10190385901568752	NA	MFAP2	ENST00000375535.3	291	552	1260	842
ENSG00000159363.17	66.89777831491598	0.06722133391479816	0.2236619422411487	0.3005488248971799	0.7637585598472113	0.998665554108594	ATP13A2	ENST00000326735.12	35	3543	3840	3577
ENSG00000117118.9	33.08419642031867	-0.38780832369029594	0.31238376298226006	-1.241448403041099	0.21444014769656827	0.937857800103766	SDHB	ENST00000375499.7	152	843	1153	994
ENSG00000117115.12	0.39699420617000114	-2.615130444399308	2.8919526112942933	-0.9042784567721207	0.3658477671874333	NA	PADI2	ENST00000375486.8	65	1998	4345	2062
ENSG00000142623.10	0.21011303254117564	0.8720993008102295	3.3658517487287454	0.25910211319901844	0.7955564543667359	NA	PADI1	ENST00000375471.4	93	1992	3846	2084
ENSG00000142619.4	0.19849710308500057	-1.814722921847541	3.7520098932356833	-0.48366688081479126	0.628622301344521	NA	PADI3	ENST00000375460.3	41	1995	3189	2035
ENSG00000159339.13	0.28179695128026566	1.1586086705226502	3.0338809567996927	0.3818899577868788	0.7025429893180182	NA	PADI4	ENST00000375448.4	27	1992	2267	2018
ENSG00000276747.1	0.35484494904317015	-0.8529416149564758	2.8679296843393365	-0.29740673894972486	0.7661559993872986	NA	PADI6	ENST00000619609.1	51	2085	2396	2135
ENSG00000179051.13	45.134497563266	-0.07185125909194623	0.27207895562000856	-0.26408238346921353	0.7917164381369133	0.998665554108594	RCC2	ENST00000375436.8	189	1569	4087	1757
ENSG00000074964.16	67.25798256962625	0.2643401651193631	0.2323900799753996	1.1374847202916134	0.255335708560976	0.9575436557009573	ARHGEF10L	ENST00000361221.7	160	3840	4488	3999
ENSG00000117148.7	0.21011303254117564	0.8720993008102295	3.3658517487287454	0.25910211319901844	0.7955564543667359	NA	ACTL8	ENST00000375406.1	217	1101	1861	1317
ENSG00000117154.11	5.715188063597571	-1.4889851370776759	0.79347919775184	-1.8765269981826984	0.06058295102113989	NA	IGSF21	ENST00000251296.3	384	1404	1943	1787
ENSG00000179023.8	0.16707677228520101	0.10883426093833813	4.0208191991403215	0.027067683362039168	0.9784057502528954	NA	KLHDC7A	ENST00000400664.2	1	2334	5145	2334
ENSG00000009709.11	0.16707677228520101	0.10883426093833813	4.0208191991403215	0.027067683362039168	0.9784057502528954	NA	PAX7	ENST00000375375.7	599	1563	2260	2161
ENSG00000179002.5	0.11472017899506465	0.10883371621799334	4.080472856796901	0.026671839278800125	0.9787214741389535	NA	TAS1R2	ENST00000375371.3	23	2520	2542	2542
ENSG00000255275.3	0	NA	NA	NA	NA	NA	NA	NA	NA	NA	NA	NA
ENSG00000159423.16	17.982838884117655	0.18544899751826358	0.418318872782732	0.44331970079337724	0.6575345079504271	0.998665554108594	ALDH4A1	ENST00000375341.7	259	1692	3363	1950
ENSG00000169991.10	4.361755140178002	-0.634103853744976	0.8550844941666377	-0.7415686497308916	0.45834872390773096	NA	IFFO2	ENST00000455833.6	355	1554	6188	1908
ENSG00000127481.14	109.70226894343759	-0.23837464213110815	0.1820605712837868	-1.3093150287853477	0.1904276608911836	0.92529621086065	UBR4	ENST00000375254.7	29	15552	15906	15580
ENSG00000127463.14	58.03872503089912	0.020374136815173076	0.26083658066220516	0.07811073417481453	0.9377399686478074	0.998665554108594	EMC1	ENST00000477853.5	44	2982	6664	3025
ENSG00000053372.4	15.16678060568237	0.4863521473401289	0.45303760454839387	1.0735359326847587	0.28303072551880243	0.9754339140136881	MRTO4	ENST00000330263.4	298	720	2315	1017
ENSG00000211454.13	0.8467549328646115	1.4291563568796462	1.9189660409924107	0.7447533340092589	0.4564208505953632	NA	NA	NA	NA	NA	NA	NA
ENSG00000162482.4	0.4588807159802586	1.93204076413364	2.7213907967678708	0.7099460931624658	0.47773756555848945	NA	AKR7A3	ENST00000361640.4	542	996	1710	1537
ENSG00000053371.12	15.320924253476603	-0.02486933727181905	0.47632058959680773	-0.05221134214011253	0.958360295540538	0.998665554108594	AKR7A2	ENST00000235835.7	23	1080	1362	1102
ENSG00000040487.12	12.851463896927266	-0.40676064851795884	0.49497540379642535	-0.8217795175237683	0.41120239310502604	0.998665554108594	PQLC2	ENST00000375153.7	641	876	2153	1516
ENSG00000077549.17	135.93292309356548	0.33890254626324345	0.16515711439668448	2.0520008932176337	0.04016957560823139	0.5927635638697271	CAPZB	ENST00000433834.5	386	906	1462	1291
ENSG00000173436.14	17.612753639980298	0.054065627642449814	0.4461505383402732	0.12118247765334907	0.90354650263366	0.998665554108594	MINOS1	ENST00000322753.6	57	237	3712	293
ENSG00000158747.14	5.7683046670520595	-4.509234823015402e-5	0.7363761774854529	-6.123547937704002e-5	0.9999511411564622	NA	NBL1	ENST00000289749.6	81	651	731	731
ENSG00000270136.6	0.2294403579901293	0.9544283611678432	3.5363014242657567	0.2698945159534899	0.7872414063075179	NA	NA	NA	NA	NA	NA	NA
ENSG00000158748.3	1.2402785680570834	-1.2418516679392497	1.5449203362360238	-0.803828934613446	0.42149577675532846	NA	HTR6	ENST00000289753.1	468	1323	1984	1790
ENSG00000162542.13	0.37718980482637665	1.6099288391927182	2.5410755411531443	0.6335619752815888	0.5263667228897979	NA	TMCO4	ENST00000294543.10	243	1905	2974	2147
ENSG00000178828.6	0.19849710308500057	-1.814722921847541	3.7520098932356833	-0.48366688081479126	0.628622301344521	NA	RNF186	ENST00000375121.3	178	684	1250	861
ENSG00000169914.5	14.779474862950766	-0.11550034680858333	0.4630387752635238	-0.2494399021828139	0.8030205228746838	0.998665554108594	OTUD3	ENST00000375120.3	2	1197	6397	1198
ENSG00000188784.4	0	NA	NA	NA	NA	NA	PLA2G2E	ENST00000375116.3	59	429	785	487
ENSG00000188257.11	0.1877681767579691	-1.8147221247558167	3.8342613253018007	-0.47329119504210554	0.6360054430717719	NA	PLA2G2A	ENST00000400520.7	271	435	974	705
ENSG00000127472.10	0.16707677228520101	0.10883426093833813	4.0208191991403215	0.027067683362039168	0.9784057502528954	NA	PLA2G5	ENST00000375108.3	269	417	1161	685
ENSG00000117215.14	0	NA	NA	NA	NA	NA	PLA2G2D	ENST00000375105.7	60	438	2672	497
ENSG00000158786.4	0	NA	NA	NA	NA	NA	PLA2G2F	ENST00000375102.3	103	636	2723	738
ENSG00000187980.6	0	NA	NA	NA	NA	NA	NA	NA	NA	NA	NA	NA
ENSG00000162543.5	2.0251915053804925	-0.8111359734597886	1.2169979755013234	-0.6665056062444589	0.5050879814793032	NA	UBXN10	ENST00000375099.3	85	843	5571	927
ENSG00000158816.15	0.4991683391709435	-0.06795188833729096	2.4240488546535723	-0.028032392254322844	0.977636316009372	NA	NA	NA	NA	NA	NA	NA
ENSG00000162545.5	39.94066313426401	-0.016295539673804354	0.3053613983872418	-0.05336476633873442	0.9574412775816334	0.998665554108594	CAMK2N1	ENST00000375078.3	842	237	2336	1078
ENSG00000090432.6	14.87266003265162	-0.2747635548642028	0.47726260383152297	-0.57570727867293	0.5648130547081589	0.998665554108594	MUL1	ENST00000264198.4	138	1059	2438	1196
ENSG00000183114.7	0.950770220784039	-1.0521779147231551	1.8878722098771	-0.5573353478155451	0.5772983290998539	NA	FAM43B	ENST00000332947.5	536	990	2572	1525
ENSG00000158825.5	0	NA	NA	NA	NA	NA	CDA	ENST00000375071.3	183	441	963	623
ENSG00000158828.7	69.73735521836156	-0.3692470002843234	0.23081698909993653	-1.5997392640991908	0.10965643755284271	0.8185011070293065	PINK1	ENST00000321556.4	95	1746	2660	1840
ENSG00000244038.9	74.81720743969592	0.084771307960897	0.252965478672886	0.33511018343540955	0.7375419712948501	0.998665554108594	DDOST	ENST00000415136.6	144	1371	2126	1514
ENSG00000117245.12	5.0871699632314975	-1.4487013877604746	0.8063749024044177	-1.796560611498191	0.07240540223645582	NA	KIF17	ENST00000247986.2	312	3090	3969	3401
ENSG00000189410.11	0.1877681767579691	-1.8147221247558167	3.8342613253018007	-0.47329119504210554	0.6360054430717719	NA	SH2D5	ENST00000444387.6	399	1272	1934	1670
ENSG00000127483.17	185.23635835733998	0.28043799609481335	0.14665170915138068	1.9122722654758308	0.05584128123769024	0.6818409843273348	HP1BP3	ENST00000312239.9	141	1662	3938	1802
ENSG00000075151.20	168.691858415126	-0.49722990400583617	0.15523282246307615	-3.203123515480161	0.0013594566116800618	0.06469844046554789	EIF4G3	ENST00000400422.6	582	4866	5762	5447
ENSG00000117298.15	14.095268824787354	-0.16286662579777786	0.47440755038189336	-0.3433052987176782	0.731368794983539	0.998665554108594	ECE1	ENST00000374893.10	76	2313	2484	2388
ENSG00000142794.18	2.1653946254408654	0.654684589774025	1.2353289060649262	0.529967838168288	0.5961342299176287	NA	NBPF3	ENST00000318249.9	176	1902	3591	2077
ENSG00000162551.13	0	NA	NA	NA	NA	NA	ALPL	ENST00000374840.7	251	1575	2589	1825
ENSG00000076864.19	29.82973353627934	-0.9997915947401552	0.33327477083896856	-2.999901829422407	0.002700666345643495	0.1017289297516435	RAP1GAP	ENST00000374763.6	10	2247	3334	2256
ENSG00000090686.15	48.13593085341837	0.2312066690062681	0.27894678298122283	0.8288558359958992	0.40718598847838067	0.998665554108594	USP48	ENST00000308271.13	650	3108	4595	3757
ENSG00000187942.11	0	NA	NA	NA	NA	NA	LDLRAD2	ENST00000344642.6	188	819	4012	1006
ENSG00000142798.19	1.1615811519860597	1.971924231214789	1.779620721929821	1.10805870425943	0.26783646393029725	NA	HSPG2	ENST00000374695.7	81	13176	14327	13256
ENSG00000219073.7	0.11472017899506465	0.10883371621799334	4.080472856796901	0.026671839278800125	0.9787214741389535	NA	CELA3B	ENST00000337107.10	20	813	897	832
ENSG00000142789.19	0	NA	NA	NA	NA	NA	CELA3A	ENST00000290122.7	20	813	887	832
ENSG00000285721.1	0	NA	NA	NA	NA	NA	NA	NA	NA	NA	NA	NA
ENSG00000070831.15	51.013758717927104	-0.18032226862830134	0.2497042039061745	-0.7221435034231815	0.4702062539909424	0.998665554108594	CDC42	ENST00000400259.5	293	576	2274	868
ENSG00000162552.14	0.8158116779594827	-0.05985915997751994	1.9503065789701488	-0.03069217969265546	0.9755150279271747	NA	WNT4	ENST00000290167.10	45	1056	3845	1100
ENSG00000184677.17	21.316154174912555	0.4232237882287697	0.38548867260621517	1.0978890387814373	0.27225294489161334	0.9662628528629047	ZBTB40	ENST00000404138.5	512	3720	8992	4231
ENSG00000070886.11	7.070073858685646	1.3943333918554046	0.7760164199572289	1.796783361790534	0.07237001876097103	0.7338137526599261	EPHA8	ENST00000166244.7	73	3018	4943	3090
ENSG00000173372.16	0.1877681767579691	-1.8147221247558167	3.8342613253018007	-0.47329119504210554	0.6360054430717719	NA	C1QA	ENST00000374642.7	205	738	1143	942
ENSG00000159189.11	0	NA	NA	NA	NA	NA	C1QC	ENST00000374639.7	119	738	1183	856
ENSG00000173369.15	0	NA	NA	NA	NA	NA	C1QB	ENST00000314933.6	133	762	1044	894
ENSG00000133216.16	42.087968550998	0.48655139281695003	0.28668559788678266	1.6971602215228754	0.08966637331998761	0.7758814629799905	EPHB2	ENST00000400191.7	19	3168	10816	3186
ENSG00000215906.8	0.09539285354611099	0.10883371621799316	4.080472856796901	0.02667183927880008	0.9787214741389535	NA	NA	NA	NA	NA	NA	NA
ENSG00000227868.5	0.11472017899506465	0.10883371621799334	4.080472856796901	0.026671839278800125	0.9787214741389535	NA	TEX46	ENST00000566855.3	78	366	510	443
ENSG00000004487.16	243.65653799795194	0.08432805195222723	0.13776764447981524	0.6121034606538721	0.5404693080544377	0.998665554108594	KDM1A	ENST00000400181.8	105	2631	3059	2735
ENSG00000169641.13	13.508693440491362	-0.5882477769725951	0.4765640512944337	-1.234351972992525	0.21707177703391584	0.9409987121959955	LUZP1	ENST00000302291.8	803	3231	8898	4033
ENSG00000179546.4	0	NA	NA	NA	NA	NA	HTR1D	ENST00000374619.1	511	1134	2835	1644
ENSG00000125944.19	232.89745267994022	0.08104115965168987	0.14490694039476543	0.5592634792433819	0.5759819158740429	0.998665554108594	HNRNPR	ENST00000374616.7	110	1911	2691	2020
ENSG00000125945.14	37.5448838117072	-0.4828089490305646	0.29651973491931616	-1.6282523291811868	0.10347139304027164	0.8002071017978097	ZNF436	ENST00000314011.8	138	1413	4071	1550
ENSG00000204219.10	0.11472017899506465	0.10883371621799334	4.080472856796901	0.026671839278800125	0.9787214741389535	NA	TCEA3	ENST00000450454.6	108	1047	1559	1154
ENSG00000088280.18	7.605157054702323	-1.4572179811726074	0.6584076966392074	-2.213245666189607	0.0268807132989299	0.47589614824425497	ASAP3	ENST00000336689.7	46	2712	4050	2757
ENSG00000007968.6	0.16707677228520101	0.10883426093833813	4.0208191991403215	0.027067683362039168	0.9784057502528954	NA	E2F2	ENST00000361729.2	428	1314	5191	1741
ENSG00000117318.8	0.9256972069532037	-0.14084455116042596	1.8851236154017486	-0.07471369517081236	0.9404425109599296	NA	ID3	ENST00000374561.5	369	360	1251	728
ENSG00000142676.14	260.3571641195989	0.019783390479500385	0.12969771151864745	0.15253461489685577	0.8787652911110182	0.998665554108594	RPL11	ENST00000643754.2	19	537	1017	555
ENSG00000011007.12	45.78114522470397	0.09040491904286285	0.2645717011769691	0.3417029056421722	0.732574485212353	0.998665554108594	ELOA	ENST00000418390.6	272	2397	5154	2668
ENSG00000057757.9	49.42655755461871	-0.6067601845092182	0.26301813884808006	-2.3069138393519104	0.021059623858937143	0.40790808334637274	PITHD1	ENST00000246151.8	112	636	1603	747
ENSG00000011009.10	38.76802954446847	0.03716449748070896	0.308231912900436	0.12057316561090062	0.9040291244845927	0.998665554108594	LYPLA2	ENST00000374514.7	308	696	1810	1003
ENSG00000117308.14	21.505684833749697	0.3807467740459115	0.3954272026267707	0.9628745101921692	0.3356105027579651	0.9935348558041641	GALE	ENST00000617979.4	170	1047	1566	1216
ENSG00000117305.14	9.306258849894084	-0.16609043064127113	0.6136926013281788	-0.27064108363342065	0.7866670944469365	0.998665554108594	HMGCL	ENST00000374490.7	45	978	1600	1022
ENSG00000179163.11	9.273644693545702	0.8054103003798152	0.594432809646813	1.354922351709281	0.17544229744765788	0.9196103367818435	FUCA1	ENST00000374479.3	9	1401	2047	1409
ENSG00000188822.7	0	NA	NA	NA	NA	NA	CNR2	ENST00000374472.4	163	1083	5254	1245
ENSG00000189266.12	2.152683510229839	0.3865821307304072	1.2231261735398178	0.31606071319004636	0.7519564256905976	NA	PNRC2	ENST00000334351.7	412	420	2416	831
ENSG00000188529.14	44.729180226440036	-0.12615187949271292	0.27012518720472944	-0.46701264994256786	0.6404908276271519	0.998665554108594	SRSF10	ENST00000492112.2	65	789	1631	853
ENSG00000142661.18	0.8733406136630673	-0.2473343956659628	1.91024704321229	-0.12947770108835915	0.896979668370779	NA	MYOM3	ENST00000374434.3	164	4314	5804	4477
ENSG00000142677.3	0.09539285354611099	0.10883371621799316	4.080472856796901	0.02667183927880008	0.9787214741389535	NA	IL22RA1	ENST00000270800.1	40	1725	2798	1764
ENSG00000185436.11	0.5040029891722873	0.4449035352324484	2.358311212852463	0.18865344523139568	0.850364441601727	NA	IFNLR1	ENST00000327535.5	14	1563	4549	1576
ENSG00000158055.15	0.35484494904317015	-0.8529416149564758	2.8679296843393365	-0.29740673894972486	0.7661559993872986	NA	GRHL3	ENST00000350501.9	128	1881	2119	2008
ENSG00000001460.17	7.0178428575000495	-0.42080117232252834	0.6488281165956782	-0.6485556984343105	0.5166255983133998	0.998665554108594	STPG1	ENST00000374409.5	256	1005	2804	1260
ENSG00000001461.16	5.543144691252249	-0.0466936133225868	0.7982143314974397	-0.05849758827931614	0.9533522834812801	NA	NIPAL3	ENST00000374399.8	369	1221	1711	1589
ENSG00000117602.11	52.20762071980465	-0.3320234525440678	0.2511594420292892	-1.321962853004541	0.18618052091554613	0.92529621086065	RCAN3	ENST00000374395.8	314	726	6802	1039
ENSG00000184454.6	0	NA	NA	NA	NA	NA	NCMAP	ENST00000374392.2	67	309	3953	375
ENSG00000133226.16	144.53221616387964	-0.3255715974275376	0.1697736228027609	-1.9176806859200928	0.055151512204971956	0.6782552952679769	SRRM1	ENST00000323848.13	316	2715	4011	3030
ENSG00000169504.14	25.615100612897848	-0.29808064457127204	0.34951923233360294	-0.8528304510773396	0.3937533345882159	0.998665554108594	CLIC4	ENST00000374379.8	198	762	4346	959
ENSG00000020633.18	0	NA	NA	NA	NA	NA	RUNX3	ENST00000399916.5	440	1290	4340	1729
ENSG00000117614.9	23.08422737802462	0.2983779595821929	0.3852081696177923	0.7745888667892135	0.43858263802632347	0.998665554108594	SYF2	ENST00000236273.8	27	732	1345	758
ENSG00000117616.17	21.505154288747427	0.38875868458225943	0.40968497986726626	0.948921009279406	0.3426607883271987	0.9935348558041641	RSRP1	ENST00000243189.11	278	873	1502	1150
ENSG00000187010.20	0.09539285354611099	0.10883371621799316	4.080472856796901	0.02667183927880008	0.9787214741389535	NA	RHD	ENST00000342055.9	1	1482	1557	1482
ENSG00000183726.10	37.93717775799162	0.3436482150605732	0.2905027442791475	1.1829430937504588	0.23683170120224473	0.9483402576184613	TMEM50A	ENST00000374358.4	554	474	2683	1027
ENSG00000188672.18	0	NA	NA	NA	NA	NA	RHCE	ENST00000294413.12	129	1254	1660	1382
ENSG00000204178.10	60.60056126321536	0.19322578286326786	0.23807149775646144	0.8116292151063411	0.41700442223717776	0.998665554108594	MACO1	ENST00000374343.4	180	1995	3917	2174
ENSG00000157978.11	0.11472017899506465	0.10883371621799334	4.080472856796901	0.026671839278800125	0.9787214741389535	NA	LDLRAP1	ENST00000374338.4	120	927	2940	1046
ENSG00000117643.14	0.357862479377423	1.5478705681019607	2.752388601283676	0.5623735570551539	0.5738615314344382	NA	MAN1C1	ENST00000374332.8	331	1893	4641	2223
ENSG00000162430.16	19.654064769051317	0.9142208546718321	0.41904830834808104	2.1816598145348856	0.029134648820677053	0.5041247396277163	SELENON	ENST00000361547.6	56	1773	4334	1828
ENSG00000255054.3	8.329253066517674	0.5965389722676251	0.6457159007405614	0.9238412304598105	0.35556898504879	0.9954514406987122	NA	NA	NA	NA	NA	NA
ENSG00000117640.17	28.64362997951868	-0.26332187650049294	0.3671511232207788	-0.7172029713283751	0.4732488661511027	0.998665554108594	MTFR1L	ENST00000374301.7	309	879	2099	1187
ENSG00000127423.10	0.09539285354611099	0.10883371621799316	4.080472856796901	0.02667183927880008	0.9787214741389535	NA	AUNIP	ENST00000538789.5	102	1116	1392	1217
ENSG00000182749.5	5.913742321092093	-0.2026543647084191	0.7208377280646694	-0.28113728904355867	0.7786051015221156	NA	PAQR7	ENST00000374296.3	668	1041	3297	1708
ENSG00000117632.22	2428.4831930776745	0.09816062608315264	0.08728903559721649	1.1245470340181285	0.2607810290076614	0.9610464899149954	STMN1	ENST00000426559.6	141	525	948	665
ENSG00000158006.13	2.4857051936535286	-0.7207202500039884	1.1158921369405799	-0.6458690998396792	0.5183641327114725	NA	PAFAH2	ENST00000374282.7	181	1179	3581	1359
ENSG00000158008.9	1.3308367716018505	-1.3149913521462837	1.5603216672213616	-0.8427693979844779	0.3993574260299016	NA	EXTL1	ENST00000374280.3	868	2031	4015	2898
ENSG00000158014.14	0.21011303254117564	0.8720993008102295	3.3658517487287454	0.25910211319901844	0.7955564543667359	NA	SLC30A2	ENST00000374276.3	238	1119	2494	1356
ENSG00000158022.6	0	NA	NA	NA	NA	NA	TRIM63	ENST00000374272.3	140	1062	1770	1201
ENSG00000175087.9	26.976273812614746	0.5600762328221206	0.357552501473287	1.5664167654102241	0.11725108054407904	0.8339028797662309	PDIK1L	ENST00000374271.8	288	1026	4279	1313
ENSG00000197245.5	1.1183445479815717	0.7754082917800769	1.7379785657509046	0.4461552674241738	0.6554850928190168	NA	FAM110D	ENST00000374268.4	188	816	2858	1003
ENSG00000282872.1	0.11472017899506465	0.10883371621799334	4.080472856796901	0.026671839278800125	0.9787214741389535	NA	NA	NA	NA	NA	NA	NA
ENSG00000236782.7	0.5740334566009389	-3.1523638365131057	2.362392143351317	-1.3343948189910273	0.18207449711507523	NA	NA	NA	NA	NA	NA	NA
ENSG00000142684.8	17.493516438345416	0.48171703060459886	0.4365996894166148	1.1033380056872462	0.2698804078167464	0.9635913377349107	ZNF593	ENST00000374266.6	114	405	675	518
ENSG00000142675.17	6.073855317031093	0.5639247196047099	0.7361834796665301	0.7660111034550131	0.44366969549539975	0.998665554108594	CNKSR1	ENST00000374253.9	40	2163	2538	2202
ENSG00000188782.8	0.4037754856248325	-0.852941821502808	2.7514621128141026	-0.3099958445840448	0.7565641163553191	NA	CATSPER4	ENST00000456354.6	68	1419	1912	1486
ENSG00000130695.15	25.4343295812669	0.018396008190730236	0.35484829634305914	0.05184189519947814	0.9586546728733876	0.998665554108594	CEP85	ENST00000252992.8	132	2289	3935	2420
ENSG00000142669.14	47.06895309292441	-0.18047365776794205	0.2654589828915592	-0.6798551542769455	0.49659617968093334	0.998665554108594	SH3BGRL3	ENST00000270792.9	981	282	1661	1262
ENSG00000158062.20	10.53063761289089	-0.23632703150957163	0.5660797296787579	-0.4174801165264897	0.676327264961816	0.998665554108594	UBXN11	ENST00000374222.5	466	1563	2043	2028
ENSG00000169442.8	0	NA	NA	NA	NA	NA	CD52	ENST00000374213.2	62	186	468	247
ENSG00000176092.15	1.5667892661551566	-0.530838042583043	1.4683625485856997	-0.36151701301176375	0.7177129892122098	NA	NA	NA	NA	NA	NA	NA
ENSG00000176083.17	0.7500220355460805	-0.8905217341826486	2.0525941901189957	-0.43385182442274284	0.6643960453624979	NA	ZNF683	ENST00000436292.5	122	1575	1712	1696
ENSG00000131914.10	1.703785751412978	1.4469725598807082	1.4619005057517356	0.989788671792441	0.32227742297648454	NA	LIN28A	ENST00000326279.10	115	630	4008	744
ENSG00000117682.16	21.324676653910192	-0.04265758599886109	0.38757842698697054	-0.1100618172442687	0.9123603495607328	0.998665554108594	DHDDS	ENST00000360009.6	78	1005	3245	1082
ENSG00000198830.10	24.925134836622764	0.40713473916308096	0.3656479218862465	1.1134611050510526	0.26551044406506236	0.9618858344445017	HMGN2	ENST00000361427.5	95	273	1191	367
ENSG00000117676.13	7.3656275105005635	-0.25554223659755243	0.6344598993807037	-0.4027712970464914	0.6871164784064531	0.998665554108594	RPS6KA1	ENST00000531382.5	50	2235	2359	2284
ENSG00000117713.19	248.78107895616253	-0.18025579776615236	0.14997636576966955	-1.2018946908140533	0.22940433169945892	0.9451950096105671	ARID1A	ENST00000324856.12	372	6858	8583	7229
ENSG00000060642.10	1.7214596255514931	-0.00638443850486911	1.3375337863978563	-0.004773291388820309	0.9961914789590736	NA	PIGV	ENST00000374145.5	683	1482	2713	2164
ENSG00000204160.11	22.04738199935252	0.4516541347800176	0.38271157518711296	1.1801423423349493	0.23794360638332393	0.9492009029766487	ZDHHC18	ENST00000374142.8	96	1167	5020	1262
ENSG00000175793.11	0.11472017899506465	0.10883371621799334	4.080472856796901	0.026671839278800125	0.9787214741389535	NA	SFN	ENST00000339276.5	76	747	1320	822
ENSG00000142751.14	15.800219427436987	0.09651673470226929	0.44552038573435765	0.21663820061382685	0.8284903128457117	0.998665554108594	GPN2	ENST00000374135.8	202	933	4678	1134
ENSG00000198746.12	12.016196784592683	-0.15690282557942983	0.512500023954327	-0.30615184047954835	0.7594890386159128	0.998665554108594	GPATCH3	ENST00000361720.9	25	1578	2123	1602
ENSG00000090273.13	79.64497980900833	-0.07122652117246288	0.2148995734947145	-0.33144096106926296	0.7403114291903434	0.998665554108594	NUDC	ENST00000321265.9	124	996	1800	1119
ENSG00000131910.4	0	NA	NA	NA	NA	NA	NR0B2	ENST00000254227.3	27	774	1156	800
ENSG00000175707.8	0.11472017899506465	0.10883371621799334	4.080472856796901	0.026671839278800125	0.9787214741389535	NA	KDF1	ENST00000320567.5	90	1197	1793	1286
ENSG00000253368.3	18.059252348500284	-0.533088527946029	0.41039003787737005	-1.2989801865154507	0.19395072890968612	0.9291811678490309	TRNP1	ENST00000522111.2	81	684	1958	764
ENSG00000158246.7	0.16707677228520101	0.10883426093833813	4.0208191991403215	0.027067683362039168	0.9784057502528954	NA	TENT5B	ENST00000289166.5	167	1278	2368	1444
ENSG00000090020.10	7.4506770800800295	0.4674393557212268	0.648370980653179	0.7209442891017749	0.4709437920635069	0.998665554108594	SLC9A1	ENST00000263980.7	577	2448	4516	3024
ENSG00000142784.15	24.44926608954805	-0.04217759007305095	0.3653862026386722	-0.1154329029625677	0.90810200047218	0.998665554108594	WDTC1	ENST00000319394.7	536	2034	4819	2569
ENSG00000186501.14	26.194999353479094	-0.2046427631321197	0.34487315814697966	-0.5933855920584695	0.5529231289880384	0.998665554108594	TMEM222	ENST00000611517.4	54	627	1613	680
ENSG00000142765.17	0.6976654422559441	-1.0150688259408327	2.089864626601275	-0.4857103244967731	0.6271725624644227	NA	SYTL1	ENST00000543823.1	463	1689	2229	2151
ENSG00000142733.15	3.754679740319208	-2.38884529266535	1.000240072290037	-2.388271934752743	0.016927811176986735	NA	MAP3K6	ENST00000493901.5	241	3867	4309	4107
ENSG00000142748.12	0.1877681767579691	-1.8147221247558167	3.8342613253018007	-0.47329119504210554	0.6360054430717719	NA	FCN3	ENST00000270879.8	7	900	1030	906
ENSG00000174950.10	0	NA	NA	NA	NA	NA	CD164L2	ENST00000374030.2	142	525	993	666
ENSG00000181773.6	0.3132172820800652	-0.8529414095629032	2.9792353811423258	-0.2862954081982809	0.7746518747375544	NA	GPR3	ENST00000374024.3	100	993	2115	1092
ENSG00000158195.10	9.020971325405663	0.11733404598571727	0.5910489404768745	0.19851832555701554	0.8426395483420555	0.998665554108594	WASF2	ENST00000618852.4	217	1497	5676	1713
ENSG00000126705.14	117.08571465040437	0.1108440611025112	0.17866884926273274	0.62038828570231	0.5350021828615261	0.998665554108594	AHDC1	ENST00000374011.6	970	4812	6438	5781
ENSG00000000938.12	0.8767666703715413	0.3112712962804998	3.9427783010553448	0.0789471972586395	0.9370746223811373	NA	FGR	ENST00000374005.7	290	1590	2729	1879
ENSG00000126709.14	0.11472017899506465	0.10883371621799334	4.080472856796901	0.026671839278800125	0.9787214741389535	NA	IFI6	ENST00000339145.8	89	417	822	505
ENSG00000009780.15	12.384383911290172	0.3290419913058094	0.5307647427031312	0.619939428587573	0.5352976659616553	0.998665554108594	FAM76A	ENST00000010299.10	25	1026	1050	1050
ENSG00000117758.13	121.7198592409103	-0.20159544607831803	0.17517034717660096	-1.1508537222631416	0.2497924191149006	0.9575436557009573	STX12	ENST00000373943.8	126	831	3079	956
ENSG00000117751.17	44.72294617036431	0.03488701688154577	0.2741986039031244	0.127232656858718	0.8987562589759069	0.998665554108594	PPP1R8	ENST00000311772.9	59	1056	2344	1114
ENSG00000130775.15	0.16707677228520101	0.10883426093833813	4.0208191991403215	0.027067683362039168	0.9784057502528954	NA	THEMIS2	ENST00000373921.7	5	1932	2687	1936
ENSG00000117748.9	16.527434611718036	-0.08845452890017659	0.4448479484192978	-0.1988421644170482	0.8423862120636624	0.998665554108594	RPA2	ENST00000373909.7	87	837	1162	923
ENSG00000130768.14	0	NA	NA	NA	NA	NA	SMPDL3B	ENST00000373894.7	192	1368	1878	1559
ENSG00000158156.7	1.7523785955825357	1.6552970351119554	1.5228463205314695	1.0869757590078168	0.2770475229561252	NA	XKR8	ENST00000373884.5	609	1188	2692	1796
ENSG00000158161.15	19.046090877160474	0.45047315238231267	0.40938411767899535	1.1003679256935315	0.2711718475049113	0.9651842356708785	EYA3	ENST00000373871.7	242	1722	6085	1963
ENSG00000169403.11	0.16707677228520101	0.10883426093833813	4.0208191991403215	0.027067683362039168	0.9784057502528954	NA	PTAFR	ENST00000373857.7	636	1029	4491	1664
ENSG00000126698.10	44.41115626532533	0.20193723411168943	0.29866181979462714	0.6761401047196132	0.4989516960341651	0.998665554108594	DNAJC8	ENST00000263697.5	28	762	1759	789
ENSG00000130770.17	115.87340475599206	-0.09544441978050337	0.20284878347249516	-0.4705200501902194	0.6379835127893037	0.998665554108594	ATP5IF1	ENST00000335514.9	52	321	494	372
ENSG00000130766.4	18.167364812551686	-1.2747770878290943	0.4441348435406549	-2.8702478681171173	0.004101501470662518	0.13804749436617722	SESN2	ENST00000253063.3	322	1443	3453	1764
ENSG00000130772.13	5.849986623367394	-0.09872185912415217	0.730936362375287	-0.13506218079415386	0.8925627114876803	NA	MED18	ENST00000373842.8	210	627	1833	836
ENSG00000204138.12	44.14615108362317	-0.022013416927031137	0.2740848846517689	-0.0803160559364654	0.9359858886759336	0.998665554108594	PHACTR4	ENST00000373836.4	215	2139	3107	2353
ENSG00000180198.16	11.561101447988225	0.2874137595292862	0.5289155974272558	0.5434019358236368	0.5868530931516962	0.998665554108594	RCC1	ENST00000373831.7	62	1359	1577	1420
ENSG00000180098.9	25.160712294137173	0.507675352587326	0.3591954983036146	1.4133678038420374	0.15754760709346383	0.9063981084593372	TRNAU1AP	ENST00000373830.4	27	864	1799	890
ENSG00000120656.11	10.866520934349422	0.050534321586482536	0.53636909784541	0.09421557242853562	0.924937914789558	0.998665554108594	TAF12	ENST00000263974.4	436	486	1359	921
ENSG00000188060.7	0	NA	NA	NA	NA	NA	RAB42	ENST00000373826.3	307	318	1950	624
ENSG00000162419.12	22.077148878841882	0.301444328007653	0.3814028730658037	0.7903567311503827	0.4293194639966103	0.998665554108594	GMEB1	ENST00000294409.2	91	1722	1912	1812
ENSG00000198492.15	67.87671907449858	-0.2526029464717142	0.23375091186983177	-1.0806501007892562	0.2798527873719011	0.9699517908441929	YTHDF2	ENST00000373812.7	363	1740	2925	2102
ENSG00000116329.10	0.1877681767579691	-1.8147221247558167	3.8342613253018007	-0.47329119504210554	0.6360054430717719	NA	OPRD1	ENST00000234961.6	243	1119	9345	1361
ENSG00000159023.21	209.8368057385892	0.2524500116198579	0.14233267446670414	1.7736616877729892	0.07611912725767767	0.7428958263340272	EPB41	ENST00000343067.8	128	2595	5956	2722
ENSG00000253304.1	0	NA	NA	NA	NA	NA	TMEM200B	ENST00000420504.2	159	924	2553	1082
ENSG00000116350.16	87.72630052468966	-0.12750025386832953	0.21242037649639037	-0.6002260986977214	0.5483555624242328	0.998665554108594	SRSF4	ENST00000373795.6	236	1485	2387	1720
ENSG00000116353.15	10.032578388650085	-0.9799305357826282	0.5633091148293343	-1.7395964488867142	0.08192990324393035	0.7602133160537436	MECR	ENST00000263702.10	27	1122	1353	1148
ENSG00000060656.19	8.423019350511744	0.011710007436145335	0.6207632645466219	0.018863885968989816	0.9849496892331909	0.998665554108594	PTPRU	ENST00000345512.7	130	4341	4470	4470
ENSG00000162510.5	0.5847623829279702	-3.1716329877181653	2.3494653391579647	-1.349938190130892	0.1770358102469511	NA	MATN1	ENST00000373765.4	37	1491	3832	1527
ENSG00000162511.7	0	NA	NA	NA	NA	NA	LAPTM5	ENST00000294507.3	76	789	2223	864
ENSG00000162512.15	149.4149189926501	-0.15872481153967988	0.18468424609950185	-0.8594388254110431	0.39009845705778556	0.998665554108594	SDC3	ENST00000339394.6	176	1329	1580	1504
ENSG00000134644.15	162.39282203929415	-0.22916964277249696	0.15758521827781477	-1.4542584975735635	0.14587465219059892	0.8898768337300734	PUM1	ENST00000426105.6	92	3567	4043	3658
ENSG00000084628.9	41.08878946907432	0.25033666301743446	0.28218522931928397	0.8871359554195027	0.37500570813499357	0.998665554108594	NKAIN1	ENST00000373736.6	8	624	2589	631
ENSG00000060688.12	38.34246463027833	-0.08442546965405937	0.28780562368729745	-0.29334197355986397	0.7692607737399313	0.998665554108594	SNRNP40	ENST00000263694.8	20	1074	1597	1093
ENSG00000121766.15	42.71059711045373	0.07437748312925843	0.2863921701344543	0.25970501600773505	0.7950913231591085	0.998665554108594	ZCCHC17	ENST00000615916.4	101	792	1652	892
ENSG00000121769.7	6.026123790256341	0.17447005245752992	0.7055684013621764	0.24727588724310293	0.8046947186352784	NA	FABP3	ENST00000373713.6	63	402	725	464
ENSG00000168528.11	6.00720639204186	0.7942784128026767	0.7494712547936079	1.059785025406222	0.2892424108546177	NA	SERINC2	ENST00000373710.5	274	1395	2146	1668
ENSG00000142910.15	0.28905530662976786	-1.8147273456729796	3.257988198284016	-0.5570085694689739	0.5775215742398907	NA	TINAGL1	ENST00000271064.11	77	1404	2187	1480
ENSG00000121764.11	0	NA	NA	NA	NA	NA	HCRTR1	ENST00000403528.6	388	1278	2003	1665
ENSG00000162517.12	26.005892007019828	-0.025914375927233516	0.3646757875007383	-0.0710614107529172	0.9433488802529089	0.998665554108594	PEF1	ENST00000373703.4	24	855	1629	878
ENSG00000084636.17	0.6487349056742817	-0.7311406851473522	2.131180969637453	-0.34306832482261257	0.7315470597752978	NA	COL16A1	ENST00000373672.7	518	4815	5736	5332
ENSG00000121753.12	24.034073687907718	-0.25585859357336815	0.37190361289957985	-0.6879701747948714	0.49147156340168063	0.998665554108594	ADGRB2	ENST00000373655.6	343	4755	5400	5097
ENSG00000134668.12	0.28905530662976786	-1.8147273456729796	3.257988198284016	-0.5570085694689739	0.5775215742398907	NA	SPOCD1	ENST00000360482.6	131	3651	3960	3781
ENSG00000184007.20	13.958157986705208	0.6091206924601303	0.5059787249412224	1.203846451312532	0.22864893202681982	0.9451950096105671	PTP4A2	ENST00000647444.1	987	504	3921	1490
ENSG00000121774.17	325.7776340903897	-0.08711211286896314	0.12169499105650014	-0.7158233228228681	0.4741004492643239	0.998665554108594	KHDRBS1	ENST00000327300.11	168	1332	2757	1499
ENSG00000121775.17	25.277053938488656	0.10853240239894424	0.35091034492458884	0.3092881243562883	0.7571023638094192	0.998665554108594	TMEM39B	ENST00000336294.9	147	1479	1813	1625
ENSG00000025800.13	70.25612707053597	-0.013046260358355828	0.2269134159547359	-0.057494442554063274	0.9541513329870095	0.998665554108594	KPNA6	ENST00000373625.7	94	1611	7378	1704
ENSG00000084652.15	36.38447838779327	-0.09304867185823026	0.31405075500269686	-0.2962854582452165	0.7670120903143008	0.998665554108594	TXLNA	ENST00000373609.1	282	1641	5012	1922
ENSG00000160050.14	63.34176155393087	-0.1343931063363707	0.24170863966768105	-0.5560128364511269	0.5782020796041387	0.998665554108594	CCDC28B	ENST00000421922.6	101	726	1415	826
ENSG00000160051.11	4.532591855727357	0.5001288026399199	0.8258289932801253	0.6056081909324219	0.5447749619120925	NA	IQCC	ENST00000537469.2	12	1641	2252	1652
ENSG00000222046.2	0.7678366940274136	-0.0026505595823516823	2.056405911841334	-0.0012889282058026839	0.9989715843693641	NA	DCDC2B	ENST00000409358.1	1	1050	1349	1050
ENSG00000160055.19	3.4774461407751494	0.7108021266851612	1.0072078297856808	0.7057154498455493	0.480365111058765	NA	TMEM234	ENST00000309777.10	4	423	1082	426
ENSG00000084623.11	107.09618744138628	0.20166940445995324	0.19134035417995085	1.0539826024900538	0.2918908823724944	0.9820669292137287	EIF3I	ENST00000373586.1	73	978	1458	1050
ENSG00000183615.5	0	NA	NA	NA	NA	NA	FAM167B	ENST00000373582.3	190	492	936	681
ENSG00000182866.16	0.16707677228520101	0.10883426093833813	4.0208191991403215	0.027067683362039168	0.9784057502528954	NA	LCK	ENST00000336890.9	139	1530	2117	1668
ENSG00000116478.11	3.791793883141675	0.29866508046922546	0.9148601256812156	0.3264598293065139	0.744076477419239	NA	HDAC1	ENST00000373548.7	85	1449	2124	1533
ENSG00000175130.6	904.2664332665786	0.07117668752550008	0.10004525623524786	0.7114449020764582	0.47680858243699314	0.998665554108594	MARCKSL1	ENST00000329421.7	347	588	1699	934
ENSG00000162526.6	0.42793746107512987	-0.001100763377750948	2.672633273193835	-4.118647286148316e-4	0.9996713795011898	NA	TSSK3	ENST00000373534.3	506	807	1368	1312
ENSG00000225828.1	1.057345041300458	-0.3923347789200818	1.6454747716455667	-0.23843257014978425	0.8115456083958835	NA	FAM229A	ENST00000432622.1	153	384	699	536
ENSG00000160058.18	69.08290913989887	0.02444668350147308	0.21982828473578317	0.11120808921770976	0.9114513371565254	0.998665554108594	BSDC1	ENST00000341071.11	13	1425	4599	1437
ENSG00000254553.1	0	NA	NA	NA	NA	NA	NA	NA	NA	NA	NA	NA
ENSG00000273274.1	1.8964126134236854	-0.29321549765027616	1.3105566192467608	-0.22373355972884335	0.8229646309212687	NA	ZBTB8B	ENST00000609129.1	79	1488	12834	1566
ENSG00000160062.14	16.339165323814	0.2449084893150111	0.44515918457954756	0.5501593537743739	0.5822100795713474	0.998665554108594	ZBTB8A	ENST00000373510.8	230	1326	7075	1555
ENSG00000176261.15	9.384966536385607	1.150468737765428	0.6189896781680454	1.8586234606857124	0.06308052929851285	0.7077171677445321	ZBTB8OS	ENST00000468695.5	20	540	1601	559
ENSG00000162521.18	61.53453535600983	0.2991950980197632	0.2366549014107128	1.2642674892269075	0.2061340343732453	0.9322051161470756	RBBP4	ENST00000373493.9	160	1278	7943	1437
ENSG00000162520.14	0.09539285354611099	0.10883371621799316	4.080472856796901	0.02667183927880008	0.9787214741389535	NA	SYNC	ENST00000409190.7	460	1449	3398	1908
ENSG00000162522.10	44.394388632728976	-0.24327856565818543	0.2929596681056307	-0.8304165799725987	0.4063032946576187	0.998665554108594	KIAA1522	ENST00000401073.6	71	3285	5438	3355
ENSG00000134684.10	278.66206934103366	-0.36639685938518163	0.13214262861582565	-2.772737785097316	0.005558689158137419	0.1662348527967312	YARS	ENST00000373477.8	910	1587	3238	2496
ENSG00000116497.17	21.150628283644348	-0.004032838698075543	0.39587537070747864	-0.010187142208085231	0.9918719770985212	0.998665554108594	S100PBP	ENST00000373475.9	255	1227	4322	1481
ENSG00000160097.17	18.097831926582497	0.5277563386600966	0.423504997783108	1.246163189154097	0.2127044902440321	0.9376612741941073	FNDC5	ENST00000373471.7	68	639	2732	706
ENSG00000121905.9	7.3797824935360685	-0.21788882922066985	0.6322803021358334	-0.3446079665690116	0.730389115817613	0.998665554108594	HPCA	ENST00000373467.3	103	582	1468	684
ENSG00000121900.18	0.35484494904317015	-0.8529416149564758	2.8679296843393365	-0.29740673894972486	0.7661559993872986	NA	TMEM54	ENST00000373463.7	121	669	999	789
ENSG00000116514.16	44.09378473719137	-0.2066926244318159	0.2677937030196794	-0.7718352676000998	0.44021200066946065	0.998665554108594	RNF19B	ENST00000373456.11	1	2199	2560	2199
ENSG00000004455.16	14.752363786132157	0.42703017376946045	0.4772020751597682	0.8948623570559493	0.3708606714690208	0.998665554108594	AK2	ENST00000354858.10	165	720	1021	884
ENSG00000142920.16	6.719175276208931	-1.2011907916314095	0.7244244601950708	-1.6581311891483572	0.09729098985809749	0.7908354841357934	AZIN2	ENST00000373441.1	1	1443	1443	1443
ENSG00000116525.13	13.408248799479653	-0.5725546994808047	0.4702799536255341	-1.2174763033525093	0.22342304705054747	0.9413212488015051	TRIM62	ENST00000291416.9	235	1428	3437	1662
ENSG00000160094.14	51.465668260194796	0.16068308446363483	0.25617734844204626	0.6272337716071933	0.5305060089287692	0.998665554108594	ZNF362	ENST00000539719.5	171	1263	3106	1433
ENSG00000184389.9	0.2294403579901293	0.9544283611678432	3.5363014242657567	0.2698945159534899	0.7872414063075179	NA	A3GALT2	ENST00000442999.3	1	1023	1023	1023
ENSG00000134686.18	160.14266192335344	0.34096374540426694	0.15760931658414315	2.16334765478306	0.030514450374910577	0.515484570073871	PHC2	ENST00000257118.5	55	2577	3870	2631
ENSG00000121903.14	6.763913187346318	0.30162798922559897	0.6976621784799689	0.4323410362917634	0.665493566106364	0.998665554108594	ZSCAN20	ENST00000361328.7	154	3132	4316	3285
ENSG00000121904.17	5.786725790659953	2.110256785614121	0.9012556401605836	2.3414630561847254	0.019208326880638053	NA	CSMD2	ENST00000373381.8	178	10896	13698	11073
ENSG00000176256.10	0.19849710308500057	-1.814722921847541	3.7520098932356833	-0.48366688081479126	0.628622301344521	NA	HMGB4	ENST00000522796.1	1906	561	2505	2466
ENSG00000142698.14	0	NA	NA	NA	NA	NA	C1orf94	ENST00000488417.1	121	1797	2287	1917
ENSG00000163866.8	9.836073580525188	-0.42797871161893736	0.5492635848288585	-0.7791863932728919	0.43586992421209436	0.998665554108594	SMIM12	ENST00000521580.2	146	279	3454	424
ENSG00000189280.3	0	NA	NA	NA	NA	NA	GJB5	ENST00000338513.1	174	822	1355	995
ENSG00000189433.5	0	NA	NA	NA	NA	NA	GJB4	ENST00000339480.1	371	801	2840	1171
ENSG00000188910.7	0	NA	NA	NA	NA	NA	GJB3	ENST00000373366.2	616	813	2217	1428
ENSG00000187513.8	0.28316103030408013	-0.8529412171581342	3.0798551630514517	-0.27694198980222795	0.7818246498573196	NA	GJA4	ENST00000342280.4	89	1002	1622	1090
ENSG00000116544.11	42.99031578957898	0.16395284652499767	0.2789384068342952	0.5877743706423142	0.5566837490462746	0.998665554108594	DLGAP3	ENST00000373347.5	270	2940	3856	3209
ENSG00000284773.1	0	NA	NA	NA	NA	NA	NA	NA	NA	NA	NA	NA
ENSG00000271741.1	0	NA	NA	NA	NA	NA	NA	NA	NA	NA	NA	NA
ENSG00000243749.1	0	NA	NA	NA	NA	NA	TMEM35B	ENST00000373337.3	49	465	922	513
ENSG00000163867.16	3.585854277332859	0.7262021673060255	0.9547170991340435	0.7606464448627894	0.4468682707448904	NA	ZMYM6	ENST00000357182.8	229	3978	4330	4206
ENSG00000197056.10	8.097073275923496	0.6246474334113503	0.6671067645786872	0.9363530196037628	0.34909145826943627	0.9954514406987122	ZMYM1	ENST00000611874.4	441	3429	4466	3869
ENSG00000116560.10	358.7662735806285	-0.17648449895502127	0.15842641359477466	-1.113984057017385	0.2652860263143286	0.9618858344445017	SFPQ	ENST00000357214.5	100	2124	3747	2223
ENSG00000146463.11	62.20459022572324	-0.24445485717192328	0.241685458213362	-1.011458690891185	0.31179694283782977	0.9896696262630528	ZMYM4	ENST00000314607.10	81	4647	6994	4727
ENSG00000142687.17	20.184492175661582	0.4899860389947607	0.40189274997300517	1.2191960144284082	0.22276980431387836	0.9412204924174864	KIAA0319L	ENST00000325722.7	236	3150	4789	3385
ENSG00000020129.15	139.19035176494398	-0.05640190313980776	0.17960944852501023	-0.31402525648283985	0.7535018564351781	0.998665554108594	NCDN	ENST00000373243.6	384	2190	3683	2573
ENSG00000116819.7	4.404033786536724	2.1020059253130796	0.9985047420885632	2.105153672997419	0.03527793340894219	NA	TFAP2E	ENST00000373235.3	209	1329	2189	1537
ENSG00000126067.11	134.0931465367491	-0.24295937582970117	0.17661670159916154	-1.3756308074482497	0.16893596372086722	0.9173677651089498	PSMB2	ENST00000373237.3	413	606	2701	1018
ENSG00000142686.7	85.05204530681377	0.9923744662991395	0.21700548721525775	4.573038585493267	4.807015723772315e-6	7.736673306696823e-4	C1orf216	ENST00000270815.4	772	690	3218	1461
ENSG00000092853.13	3.715067131775534	0.7102693830251993	0.9433500055667225	0.7529224347632257	0.45149652577242816	NA	CLSPN	ENST00000318121.7	59	4020	4169	4078
ENSG00000134698.10	38.769238293258205	0.07726957970205742	0.29222267561371795	0.26442020469417027	0.7914561443077647	0.998665554108594	AGO4	ENST00000373210.3	246	2586	7116	2831
ENSG00000092847.11	36.268949217787124	0.5476748469987716	0.30212811612793894	1.8127238670063186	0.06987442144031748	0.7263786982007666	AGO1	ENST00000373204.5	214	2574	13708	2787
ENSG00000126070.19	16.715159987509846	-0.09977328865056996	0.4279500487215089	-0.23314237011688727	0.8156508546877146	0.998665554108594	AGO3	ENST00000373191.8	350	2583	19687	2932
ENSG00000092850.11	5.944911355857381	0.503693929530046	0.7226164890549447	0.6970418433002948	0.48577660790492755	NA	TEKT2	ENST00000207457.7	128	1293	1509	1420
ENSG00000116863.10	15.743225127491	-0.18509068606432655	0.4520074501180249	-0.409485918906861	0.6821830983092219	0.998665554108594	ADPRHL2	ENST00000373178.4	31	1092	1668	1122
ENSG00000171812.12	0.11472017899506465	0.10883371621799334	4.080472856796901	0.026671839278800125	0.9787214741389535	NA	COL8A2	ENST00000397799.1	226	2112	4670	2337
ENSG00000054116.11	35.20262340633919	0.23340258336823944	0.30651608857443347	0.7614692737786279	0.4463768245790539	0.998665554108594	TRAPPC3	ENST00000616395.4	137	567	1336	703
ENSG00000116871.15	263.56981094025934	-0.6805410008984544	0.13231934213554788	-5.143170982525808	2.701395525253124e-7	6.064301207089033e-5	MAP7D1	ENST00000373151.6	217	2526	3324	2742
ENSG00000054118.14	147.6915117498165	-0.0033343371751272453	0.17003848238048136	-0.01960930918958844	0.9843550376025884	0.998665554108594	THRAP3	ENST00000354618.9	225	2868	4432	3092
ENSG00000214193.10	6.516552945962545	-0.30205398236263675	0.6873708014107551	-0.439433827772002	0.6603472198063265	0.998665554108594	SH3D21	ENST00000505871.6	165	1938	2205	2102
ENSG00000142694.6	0.8333218837413455	1.1295452022477301	1.9601754729476624	0.5762469829036013	0.5644482525842964	NA	EVA1B	ENST00000270824.1	293	498	1054	790
ENSG00000196182.10	22.436420036790476	-0.10791987435304304	0.3676182076432642	-0.2935650958229148	0.7690902505936257	0.998665554108594	STK40	ENST00000373130.7	175	1323	3628	1497
ENSG00000181817.5	8.916361962877449	-0.11153839324493778	0.5844383534424689	-0.19084714852807386	0.8486453483282864	0.998665554108594	LSM10	ENST00000315732.2	151	372	850	522
ENSG00000116885.18	11.682096709129885	-0.05956422677056974	0.5139567625100433	-0.11589345858525557	0.9077369800552038	0.998665554108594	OSCP1	ENST00000356637.9	65	1170	1463	1234
ENSG00000116898.11	35.78439394466725	0.23261366374145928	0.2991313655621077	0.7776304678192045	0.43678689403194254	0.998665554108594	MRPS15	ENST00000373116.5	163	774	1006	936
ENSG00000119535.17	0.09539285354611099	0.10883371621799316	4.080472856796901	0.02667183927880008	0.9787214741389535	NA	CSF3R	ENST00000373103.5	549	2592	3454	3140
ENSG00000163873.9	4.101135753171909	1.5717029131219538	0.9751737647830782	1.6117157473689523	0.10702380933786203	NA	GRIK3	ENST00000373091.7	18	2760	9101	2777
ENSG00000163874.10	0.5856493860571139	-0.838740721092115	2.2823967336828503	-0.3674824401534838	0.7132591877296737	NA	ZC3H12A	ENST00000373087.6	117	1800	2684	1916
ENSG00000163875.15	89.6223652318885	0.020362656032151136	0.20175428941547793	0.10092799558882132	0.9196076193091542	0.998665554108594	MEAF6	ENST00000373075.6	18	606	2147	623
ENSG00000163877.10	30.78139447204157	0.1863879203655754	0.3220369173571637	0.5787781161712489	0.5627388990800599	0.998665554108594	SNIP1	ENST00000296215.7	116	1191	4605	1306
ENSG00000163879.10	25.271992340146838	0.08179994647649422	0.35675687128294187	0.22928765515386287	0.8186453476875054	0.998665554108594	DNALI1	ENST00000296218.7	11	843	2649	853
ENSG00000134697.12	56.47040636302272	-0.035330413504696956	0.2501403732355088	-0.14124234743758513	0.8876784929625287	0.998665554108594	GNL2	ENST00000373062.7	100	2196	2334	2295
ENSG00000169218.13	0	NA	NA	NA	NA	NA	RSPO1	ENST00000356545.6	714	792	2621	1505
ENSG00000116922.14	5.967150986728277	0.2591849727755918	0.7189445154279615	0.360507615280031	0.7184675627897358	NA	C1orf109	ENST00000358011.8	191	612	2355	802
ENSG00000134690.10	0.3055058860872866	1.3791407427759181	2.9037968746661345	0.4749439448771655	0.6348269279301986	NA	CDCA8	ENST00000373055.5	274	843	2469	1116
ENSG00000183317.16	13.49257528390932	-0.3966061816911687	0.48947613914355065	-0.8102666299221879	0.4177869499984251	0.998665554108594	EPHA10	ENST00000373048.8	1	3027	5425	3027
ENSG00000185090.14	23.348337547369763	-0.13854136477873483	0.3630423002422448	-0.3816121831706422	0.7027490460969327	0.998665554108594	MANEAL	ENST00000373045.10	382	1374	2685	1755
ENSG00000196449.3	8.914260557085905	0.7486815986559329	0.6378218764543729	1.1738098461247908	0.24047119929693972	0.9524549186900179	YRDC	ENST00000373044.2	6	840	1826	845
ENSG00000197982.13	35.35850429972155	0.26502991531795567	0.31004859461519774	0.8548012147801706	0.3926612055914438	0.998665554108594	C1orf122	ENST00000373042.4	260	333	973	592
ENSG00000188786.9	5.495150629162771	0.08541179445637129	0.7413000019148219	0.11521893192465607	0.9082715931044919	NA	MTF1	ENST00000373036.4	142	2262	7972	2403
ENSG00000204084.12	13.110176323480372	0.5035150086119857	0.49938441358352703	1.00827137354732	0.31332420175166203	0.9896696262630528	INPP5B	ENST00000373024.7	89	2742	3060	2830
ENSG00000183431.11	60.397458624143965	0.05952097553307923	0.24099254535957965	0.2469826419081524	0.8049216577550329	0.998665554108594	SF3A3	ENST00000373019.4	957	1506	3673	2462
ENSG00000183386.9	6.069790671444778	-0.41679193173883533	0.721233163478458	-0.5778879186984088	0.5633397923934158	0.998665554108594	FHL3	ENST00000373016.3	170	843	1647	1012
ENSG00000183520.11	56.813004449234604	0.059031661355312015	0.2413880138624986	0.24455092202274015	0.8068041687834568	0.998665554108594	UTP11	ENST00000373014.4	62	762	2019	823
ENSG00000185668.7	51.84213292415042	-0.8087773484451409	0.2490872353196901	-3.246964250926462	0.0011664304001442493	0.05833470001173387	POU3F1	ENST00000373012.4	52	1356	2184	1407
ENSG00000116954.7	18.955923723309983	-0.40289328436538807	0.4166846129909129	-0.9669022368583944	0.33359290832263916	0.9935337508593416	RRAGC	ENST00000373001.3	178	1200	2732	1377
ENSG00000214114.8	0.3055058860872866	1.3791407427759181	2.9037968746661345	0.4749439448771655	0.6348269279301986	NA	MYCBP	ENST00000397572.4	801	312	2818	1112
ENSG00000274944.4	0.16707677228520101	0.10883426093833813	4.0208191991403215	0.027067683362039168	0.9784057502528954	NA	NA	NA	NA	NA	NA	NA
ENSG00000131233.9	0	NA	NA	NA	NA	NA	GJA9	ENST00000360786.3	254	1548	1901	1801
ENSG00000158315.10	0	NA	NA	NA	NA	NA	RHBDL2	ENST00000289248.6	1010	912	2129	1921
ENSG00000174574.15	68.14339492856215	-0.002757611067885561	0.22327081626596101	-0.012350969616202256	0.9901456025751486	0.998665554108594	AKIRIN1	ENST00000432648.7	159	579	2741	737
ENSG00000168653.10	106.027400164209	0.19901184150214238	0.1863149424734248	1.068147507978479	0.2854539786577853	0.9764852498492644	NDUFS5	ENST00000372969.7	88	321	548	408
ENSG00000127603.25	184.67070441855864	0.1425260721777762	0.1499340927500181	0.9505914869902662	0.34181179180543386	0.9935348558041641	MACF1	ENST00000361689.6	53	16293	17538	16345
ENSG00000183682.7	0.5954913092550017	-3.1845811739236365	2.495312862828633	-1.2762252066114321	0.20187592059769863	NA	BMP8A	ENST00000331593.5	347	1209	1692	1555
ENSG00000090621.13	50.49786858631181	-0.22137376953163293	0.2519433103375847	-0.8786650029921773	0.37958293949834915	0.998665554108594	PABPC4	ENST00000372858.7	451	1983	2753	2433
ENSG00000163909.7	0	NA	NA	NA	NA	NA	HEYL	ENST00000372852.3	321	987	3661	1307
ENSG00000116981.3	0.19849710308500057	-1.814722921847541	3.7520098932356833	-0.48366688081479126	0.628622301344521	NA	NT5C1A	ENST00000235628.1	1	1107	1107	1107
ENSG00000116983.12	11.718489922176033	-0.5242049001987208	0.5078348483784193	-1.0322349911050277	0.3019620467853352	0.9874633954101465	HPCAL4	ENST00000372844.7	393	576	4856	968
ENSG00000084072.16	13.908772374661295	0.6113026075092548	0.5015511525290555	1.2188240510001447	0.22291098089546935	0.9412204924174864	PPIE	ENST00000372830.5	1	945	1198	945
ENSG00000116985.11	0.16707677228520101	0.10883426093833813	4.0208191991403215	0.027067683362039168	0.9784057502528954	NA	BMP8B	ENST00000372827.7	377	1209	4822	1585
ENSG00000198754.5	0	NA	NA	NA	NA	NA	OXCT2	ENST00000327582.5	94	1554	1826	1647
ENSG00000043514.16	15.876849908729366	-0.09102120658369636	0.43743092382079274	-0.20808132582091074	0.8351654678710849	0.998665554108594	TRIT1	ENST00000316891.9	16	1404	2112	1419
ENSG00000116990.10	3.677635775558623	-0.43621051935851923	0.9199534110014888	-0.4741658807304681	0.635381621822799	NA	MYCL	ENST00000397332.2	126	1185	3256	1310
ENSG00000168389.17	3.6191400479252303	-0.9177736234247781	0.9107992289067751	-1.007657444469265	0.31361894125777545	NA	MFSD2A	ENST00000372809.5	144	1632	2173	1775
ENSG00000131236.16	99.06154225584615	-0.2451150126363727	0.1968823681585955	-1.2449820414539312	0.21313835158033242	0.9376612741941073	CAP1	ENST00000372797.7	562	1428	3105	1989
ENSG00000131238.17	18.06404264857696	0.07243128265489059	0.44218774795179583	0.16380210213962448	0.8698869367652489	0.998665554108594	PPT1	ENST00000642050.1	490	921	4010	1410
ENSG00000117000.8	28.770371999426374	-0.3493591884767214	0.33193743393096714	-1.0524850552088605	0.29257706362640945	0.9828392948364816	RLF	ENST00000372771.4	28	5745	6246	5772
ENSG00000188800.5	0	NA	NA	NA	NA	NA	TMCO2	ENST00000372766.3	94	549	739	642
ENSG00000084073.8	15.54887245879298	0.2634698140549194	0.4451561705339007	0.591859287806626	0.5539448180469793	0.998665554108594	ZMPSTE24	ENST00000372759.3	166	1428	3108	1593
ENSG00000049089.14	0	NA	NA	NA	NA	NA	COL9A2	ENST00000372748.7	98	2070	2862	2167
ENSG00000084070.11	98.24340708162566	0.21467880443726572	0.19575726051896974	1.0966581973416123	0.2727908366114619	0.9662628528629047	SMAP2	ENST00000372718.7	425	1290	2939	1714
ENSG00000187801.14	10.5269577433263	-0.5435128783141479	0.5338118826800161	-1.0181730604898258	0.3085957195357912	0.9896696262630528	ZFP69B	ENST00000411995.6	376	1605	2109	1980
ENSG00000187815.9	3.6153762988046516	-0.7936474050658985	0.9102179358850159	-0.8719311867813564	0.38324591888274195	NA	ZFP69	ENST00000372706.5	1007	1581	2871	2587
ENSG00000164002.11	7.473302353311312	0.9559702676237148	0.6621949297586094	1.4436387605265955	0.14884061588866584	0.8920364745442281	EXO5	ENST00000372703.1	1075	1122	2567	2196
ENSG00000117010.16	1.4238059197998032	0.4402496174464604	1.4503668585953686	0.30354362748803243	0.761475604832571	NA	ZNF684	ENST00000372699.7	252	1137	2097	1388
ENSG00000117016.9	91.72265105707615	-0.33199947854936657	0.2046449617597511	-1.6223193363495896	0.10473499054466306	0.8031368642545984	RIMS3	ENST00000372684.7	471	927	7235	1397
ENSG00000066136.20	45.83083590924724	-0.09549813028492865	0.2681648868723699	-0.35611720609186215	0.7217527922071927	0.998665554108594	NFYC	ENST00000308733.9	7	1377	2158	1383
ENSG00000117013.15	0.6796781605794104	1.0390824679339568	2.0505059964292625	0.5067444180818823	0.6123341600873722	NA	KCNQ4	ENST00000642618.1	281	2088	4297	2368
ENSG00000179862.6	1.896099205885667	-0.6227846059605253	1.3051655401702398	-0.4771690538805462	0.6332417455022348	NA	CITED4	ENST00000372638.3	240	555	1316	794
ENSG00000171793.14	42.90087559806834	0.17407263080126642	0.27338839426532074	0.6367228253015402	0.524305403105276	0.998665554108594	CTPS1	ENST00000372621.8	509	1776	3201	2284
ENSG00000171790.15	1.8205919433440967	0.7560807724793398	1.3927373928496427	0.5428738945052255	0.587216631132145	NA	SLFNL1	ENST00000359345.5	2578	1224	4310	3801
ENSG00000010803.16	22.942273549686877	0.35705728554744615	0.3803113304570689	0.9388552403062108	0.34780507259640014	0.9954514406987122	SCMH1	ENST00000326197.11	301	1983	3275	2283
ENSG00000204060.7	4.285934470098414	-0.2313339610031986	0.8323685783299909	-0.27792250575740346	0.7810718471366598	NA	NA	NA	NA	NA	NA	NA
ENSG00000127129.9	0.16707677228520101	0.10883426093833813	4.0208191991403215	0.027067683362039168	0.9784057502528954	NA	EDN2	ENST00000372587.4	71	537	1241	607
ENSG00000127124.15	14.310472974804856	-0.46607484299189705	0.47264962297444774	-0.9860895266536452	0.3240891826189654	0.9896696262630528	HIVEP3	ENST00000372583.5	887	7221	12193	8107
ENSG00000284895.1	0.48029405436526623	0.1657985836510866	2.445605222100186	0.06779450017231545	0.9459492219180279	NA	NA	NA	NA	NA	NA	NA
ENSG00000044012.3	0	NA	NA	NA	NA	NA	GUCA2B	ENST00000372581.1	31	339	597	369
ENSG00000197273.3	0	NA	NA	NA	NA	NA	GUCA2A	ENST00000357001.2	7	348	569	354
ENSG00000198815.8	46.89518612699981	-0.2884525273410026	0.27212333493136304	-1.0600065864022952	0.2891416029252604	0.9784400431703485	FOXJ3	ENST00000372572.5	313	1869	5352	2181
ENSG00000177181.14	13.211542211469784	-0.5705013580079845	0.5051117035519929	-1.1294558292673986	0.2587055928043372	0.958065210768256	RIMKLA	ENST00000431473.3	130	1176	8909	1305
ENSG00000066185.12	0.3965171302753303	1.6744132097879647	2.6623459242490095	0.6289239856237993	0.5293988223385659	NA	ZMYND12	ENST00000372565.7	271	1098	1775	1368
ENSG00000127125.8	23.805897667912205	-0.580722005764153	0.365631962619132	-1.5882692574365385	0.11222546605856196	0.8260184798700739	PPCS	ENST00000372561.3	8	936	1431	943
ENSG00000186409.15	7.101761966793055	0.4706690988056224	0.6582131949048838	0.7150708956444382	0.4745652368851623	0.998665554108594	CCDC30	ENST00000342022.8	111	2352	3098	2462
ENSG00000171960.10	9.140699928834831	0.3198117876120314	0.5862380056808109	0.5455323341594461	0.5853874483869275	0.998665554108594	PPIH	ENST00000304979.7	23	534	752	556
ENSG00000065978.18	95.54382888561967	-0.11260387735633667	0.19261458827996472	-0.5846072115403185	0.5588118575419304	0.998665554108594	YBX1	ENST00000321358.11	140	975	1514	1114
ENSG00000164007.10	0	NA	NA	NA	NA	NA	CLDN19	ENST00000296387.5	192	675	2859	866
ENSG00000117385.15	13.857810583286	-0.11842234772402223	0.4881496542218596	-0.2425943492939572	0.8083196590846731	0.998665554108594	P3H1	ENST00000236040.8	42	2415	2993	2456
ENSG00000164008.15	3.2369631992972785	-0.038384407525013854	0.9916091836887139	-0.0387092093905652	0.9691222308819715	NA	C1orf50	ENST00000372525.6	44	600	4737	643
ENSG00000283580.3	0.5442665771115777	2.111210310978888	2.2494750229886957	0.9385346756035073	0.34796970558275564	NA	NA	NA	NA	NA	NA	NA
ENSG00000274386.5	0.28179695128026566	1.1586086705226502	3.0338809567996927	0.3818899577868788	0.7025429893180182	NA	TMEM269	ENST00000536543.5	241	738	983	978
ENSG00000177868.11	28.62098755963721	-0.17156173619927437	0.3421731803865002	-0.5013886126478048	0.6160976523904163	0.998665554108594	SVBP	ENST00000372521.8	100	201	658	300
ENSG00000164010.14	1.1806636194174447	-0.029511693266148022	1.5814890139927602	-0.018660700773153217	0.9851117790314216	NA	ERMAP	ENST00000372517.7	288	1428	3476	1715
ENSG00000164011.17	8.115489598268116	0.690291641141154	0.6372809202862133	1.0831826580201598	0.27872735564151235	0.9699517908441929	ZNF691	ENST00000372502.5	303	948	1910	1250
ENSG00000117394.21	24.238094746264483	0.5750571688377322	0.36964461287224737	1.5557028259369692	0.11977877429245513	0.8421618030475082	SLC2A1	ENST00000426263.8	526	1479	3670	2004
ENSG00000186973.10	0.16707677228520101	0.10883426093833813	4.0208191991403215	0.027067683362039168	0.9784057502528954	NA	FAM183A	ENST00000335282.4	1	405	488	405
ENSG00000117395.12	62.188064681056474	-0.17848335637834298	0.2343176943606413	-0.761715229681447	0.4462299837021593	0.998665554108594	EBNA1BP2	ENST00000431635.6	150	1086	1503	1235
ENSG00000243710.7	2.165205520972567	1.277985222962587	1.2835955008542275	0.9956292477747803	0.31943031849513376	NA	CFAP57	ENST00000610710.4	147	3852	4162	3998
ENSG00000179178.10	0	NA	NA	NA	NA	NA	TMEM125	ENST00000432792.6	571	660	1850	1230
ENSG00000253313.5	0	NA	NA	NA	NA	NA	C1orf210	ENST00000523677.5	235	342	1478	576
ENSG00000066056.13	0.6366419003234358	0.8227550087699249	2.2168545369968626	0.3711362180238032	0.7105360762796801	NA	TIE1	ENST00000372476.7	80	3417	3882	3496
ENSG00000117400.17	0.19078570709222198	0.7765631614003545	3.796479644028238	0.20454822209355655	0.8379251126934926	NA	MPL	ENST00000372470.8	1	1908	1908	1908
ENSG00000117399.13	0.45023780258928114	0.087409826806753	2.4916639834840235	0.03508090472316829	0.9720152278627608	NA	CDC20	ENST00000372462.1	204	1500	1777	1703
ENSG00000066322.14	3.0651558506854846	-0.5608890822837808	0.9815255134467128	-0.5714462585024098	0.5676971798010066	NA	ELOVL1	ENST00000621943.4	268	840	1625	1107
ENSG00000159479.16	31.99003797683077	-0.10622150030740825	0.32015718589176095	-0.33177921654808556	0.7400559789894807	0.998665554108594	MED8	ENST00000290663.10	45	906	1483	950
ENSG00000198198.16	29.80515379372076	0.07053114546235273	0.32640137554336773	0.2160871575523784	0.8289198100311943	0.998665554108594	SZT2	ENST00000562955.2	74	10128	13968	10201
ENSG00000178922.16	12.151204990668418	0.35937565460791676	0.5117014202984197	0.7023151399469091	0.48248265354309305	0.998665554108594	HYI	ENST00000372434.5	33	909	1025	941
ENSG00000142949.16	61.25548754104024	0.35594515905467455	0.23865925503905272	1.4914366467641487	0.13584689268985195	0.8730682746896237	PTPRF	ENST00000359947.8	341	5724	7727	6064
ENSG00000284989.1	0	NA	NA	NA	NA	NA	NA	NA	NA	NA	NA	NA
ENSG00000066135.12	83.7720513082108	-0.3326712096209464	0.22111629517224674	-1.504507885146139	0.13245064459400208	0.8671990428595462	KDM4A	ENST00000372396.3	135	3195	4474	3329
ENSG00000126091.20	5.254478832839293	0.0443717384131891	0.7723315019993165	0.05745167495864796	0.9541854002798716	NA	ST3GAL3	ENST00000262915.8	169	1335	2412	1503
ENSG00000117407.16	0.7707134400188486	-2.3384702986074988	2.033812122462511	-1.1497966172883816	0.2502276488242174	NA	ARTN	ENST00000414809.7	783	687	1943	1469
ENSG00000117408.10	41.6040516436804	1.033126165158255	0.2901416503937802	3.560764763542554	3.697762473992618e-4	0.025773695606128074	IPO13	ENST00000372343.7	663	2892	3894	3554
ENSG00000132768.13	11.898748197927299	-0.1152097269202528	0.5173309702482697	-0.22270023166206943	0.8237688210493548	0.998665554108594	DPH2	ENST00000255108.7	173	1470	2472	1642
ENSG00000117410.13	115.33758094713744	0.35433225980313293	0.179848673802897	1.9701688775946111	0.04881901912764911	0.6292527322070407	ATP6V0B	ENST00000532642.5	98	786	1685	883
ENSG00000117411.16	10.97463233653035	0.8074823627696277	0.5511200347026624	1.4651660471847603	0.14287562049604524	0.8876369259267097	B4GALT2	ENST00000309519.8	77	1206	2004	1282
ENSG00000159214.12	7.188254373513947	-0.8217118396674273	0.6457063111077078	-1.2725782999670274	0.20316772292007657	0.9295765221605414	CCDC24	ENST00000372318.7	172	924	1463	1095
ENSG00000196517.11	17.5950214601947	-0.4426268268666519	0.43593267738715685	-1.0153559249552424	0.3099361948223476	0.9896696262630528	SLC6A9	ENST00000360584.6	193	2121	2330	2313
ENSG00000171872.4	0	NA	NA	NA	NA	NA	KLF17	ENST00000372299.3	59	1170	3131	1228
ENSG00000283039.1	0.11472017899506465	0.10883371621799334	4.080472856796901	0.026671839278800125	0.9787214741389535	NA	NA	NA	NA	NA	NA	NA
ENSG00000178028.13	41.80514605289755	-0.13072730530685017	0.2776555142379594	-0.470825532371069	0.6377653298994863	0.998665554108594	DMAP1	ENST00000372289.6	264	1404	1730	1667
ENSG00000117419.15	42.89275548480982	-0.7231740107482232	0.27508585661969914	-2.6289029164738094	0.008566081196177055	0.22702679864838113	ERI3	ENST00000372257.6	183	1014	1684	1196
ENSG00000187147.17	221.44789789008703	0.1257667023895549	0.1405091506713774	0.895078375953591	0.37074519248447213	0.998665554108594	RNF220	ENST00000355387.6	451	1701	3099	2151
ENSG00000126106.13	7.904640555537776	-0.6679661084511228	0.6100219896125527	-1.0949869346109515	0.27352236049390144	0.9662628528629047	TMEM53	ENST00000372237.7	165	834	2310	998
ENSG00000198520.11	3.8563397518564204	0.4584803009922243	0.9321936938656951	0.4918294384624741	0.6228399237009377	NA	ARMH1	ENST00000458657.6	308	1323	1818	1630
ENSG00000142945.12	0	NA	NA	NA	NA	NA	KIF2C	ENST00000372224.8	114	2178	2879	2291
ENSG00000142937.11	72.34590411419147	-0.03495670319958523	0.21893717416756434	-0.1596654534913792	0.8731446158359477	0.998665554108594	RPS8	ENST00000396651.7	161	627	881	787
ENSG00000142959.4	1.1164829140454255	0.46655182157236114	1.6775213333112429	0.2781197546092836	0.7809204317582537	NA	BEST4	ENST00000372207.3	1	1422	2047	1422
ENSG00000173846.12	16.49414081852965	-0.4816995967215315	0.45423799372859125	-1.0604564201411752	0.28893700611291234	0.9784400431703485	PLK3	ENST00000372201.4	240	1941	2492	2180
ENSG00000188396.3	0	NA	NA	NA	NA	NA	TCTEX1D4	ENST00000339355.2	8	666	763	673
ENSG00000222009.8	0.19849710308500057	-1.814722921847541	3.7520098932356833	-0.48366688081479126	0.628622301344521	NA	NA	NA	NA	NA	NA	NA
ENSG00000117425.13	3.193449863146633	0.6108911017036597	0.9822577852723113	0.6219254363398121	0.5339908985373589	NA	PTCH2	ENST00000372192.3	132	3612	4225	3743
ENSG00000070785.16	26.66246445412769	0.4971023514112241	0.35286351931388477	1.4087666312964298	0.15890418508698795	0.9065355381561654	EIF2B3	ENST00000360403.6	128	1359	1659	1486
ENSG00000126107.14	27.532999276315945	0.1283284952911238	0.33898224737036997	0.3785699584170638	0.7050072342306244	0.998665554108594	HECTD3	ENST00000372172.4	73	2586	3610	2658
ENSG00000126088.13	19.190791204432777	0.727917942764016	0.41274563024835187	1.7635993925024058	0.07779945007478313	0.7499617084179951	UROD	ENST00000246337.8	120	1104	1300	1223
ENSG00000162415.6	60.984192144475074	-0.43038716556356965	0.2306812105283649	-1.8657226766661543	0.062080175322705405	0.7006844996754656	ZSWIM5	ENST00000359600.5	207	3558	5819	3764
ENSG00000186603.5	3.398422392126743	-0.650621830316667	0.982441525383629	-0.6622499288826464	0.5078110605684563	NA	HPDL	ENST00000334815.4	245	1116	1629	1360
ENSG00000132781.17	3.956019345547088	1.3642711966789758	0.9571377379965562	1.4253655900504096	0.15405154935728987	NA	MUTYH	ENST00000372098.7	135	1641	1839	1775
ENSG00000132773.11	6.05345544021843	-0.5434663911905743	0.7253373457691187	-0.7492601812944076	0.45370040256301514	NA	TOE1	ENST00000372090.5	584	1533	2389	2116
ENSG00000070759.16	0.29388995663111156	-0.852941290235095	3.042030946726463	-0.2803854744321215	0.779181780019977	NA	TESK2	ENST00000372086.3	402	1716	3074	2117
ENSG00000280670.2	0.16707677228520101	0.10883426093833813	4.0208191991403215	0.027067683362039168	0.9784057502528954	NA	NA	NA	NA	NA	NA	NA
ENSG00000132763.14	5.43335695374705	-0.9327944751783751	0.7975442759252739	-1.1695833113417937	0.2421686965219115	NA	MMACHC	ENST00000401061.8	281	849	5296	1129
ENSG00000117450.13	203.7278025117947	0.2019364809584806	0.14618321718387436	1.3813930548845277	0.16715814015704145	0.9160150852988098	PRDX1	ENST00000262746.5	342	600	1234	941
ENSG00000117448.13	61.884812687571724	-0.511211790244391	0.23302261396946028	-2.193829094679154	0.028247698347218665	0.49416724460391226	AKR1A1	ENST00000372070.7	748	978	1818	1725
ENSG00000132780.16	112.19735814661803	0.4107291106067088	0.18185477758396892	2.2585555137096156	0.023911047700122354	0.44560125103470116	NASP	ENST00000350030.7	88	2367	3207	2454
ENSG00000159588.14	0.9228204609617687	1.6146301253709017	1.8637643339060253	0.8663274084588822	0.38631063985965125	NA	CCDC17	ENST00000528266.5	149	1869	2181	2017
ENSG00000159592.10	10.057843250935168	0.39116806218242156	0.5799552002035945	0.6744797909305774	0.5000063296637762	0.998665554108594	GPBP1L1	ENST00000355105.7	1362	1425	3736	2786
ENSG00000159596.6	8.644428899951285	-0.6479344075696909	0.6663797092111238	-0.9723201331215969	0.3308913108734491	0.9930343427594474	TMEM69	ENST00000372025.4	1158	744	2439	1901
ENSG00000197429.10	6.325535056269427	0.22389829596643546	0.7033794310039669	0.3183179463278515	0.7502437725558594	0.998665554108594	IPP	ENST00000396478.3	104	1755	3113	1858
ENSG00000086015.20	49.949904163494914	0.35322946787757403	0.2591029190481056	1.3632786121255263	0.17279471997531462	0.9191044976216826	MAST2	ENST00000361297.6	284	5397	5738	5680
ENSG00000117461.14	7.2983719998302625	0.0688838889088166	0.6508601239273514	0.10583516546253396	0.9157131354599364	0.998665554108594	PIK3R3	ENST00000262741.9	691	1386	5609	2076
ENSG00000278139.1	0	NA	NA	NA	NA	NA	AL358075.4	ENST00000540385.2	18	1524	1553	1541
ENSG00000117472.9	0	NA	NA	NA	NA	NA	TSPAN1	ENST00000372003.5	465	726	1615	1190
ENSG00000250719.1	0.28905530662976786	-1.8147273456729796	3.257988198284016	-0.5570085694689739	0.5775215742398907	NA	NA	NA	NA	NA	NA	NA
ENSG00000085998.13	17.128068137837	0.17131888308926282	0.4326172509953178	0.3960056671228698	0.6921008475123832	0.998665554108594	POMGNT1	ENST00000371992.1	652	2247	2934	2898
ENSG00000171357.5	0.7620910056455319	1.1816983788433357	2.0784950548762606	0.568535573886023	0.5696713573952307	NA	LURAP1	ENST00000371980.3	94	720	1854	813
ENSG00000085999.11	1.1285759193962717	-0.5223252111165697	1.6327585961569295	-0.3199035131990617	0.7490414745682827	NA	RAD54L	ENST00000371975.8	675	2244	3108	2918
ENSG00000132128.16	89.44758837786803	-0.0832018307601247	0.19924048630611066	-0.4175949994033563	0.67624325352114	0.998665554108594	LRRC41	ENST00000617190.4	287	2439	4128	2725
ENSG00000173660.11	15.957972310454293	0.5353729230299652	0.44487071455564187	1.2034348531229377	0.2288080873890636	0.9451950096105671	UQCRH	ENST00000311672.9	137	276	604	412
ENSG00000117481.10	5.61887773365398	-0.008293523579212746	0.7262744882291718	-0.011419268766323196	0.9908889397693749	NA	NSUN4	ENST00000474844.5	651	1155	2150	1805
ENSG00000117480.15	15.90453305972434	-0.13339099828164827	0.463992247275273	-0.28748540318284954	0.7737406770154742	0.998665554108594	FAAH	ENST00000243167.8	85	1740	2094	1824
ENSG00000197587.10	0.3024883557530338	-0.852941344952721	3.013398577298713	-0.2830496275462237	0.7771387945328347	NA	DMBX1	ENST00000360032.3	15	1134	2880	1148
ENSG00000282881.2	0.1877681767579691	-1.8147221247558167	3.8342613253018007	-0.47329119504210554	0.6360054430717719	NA	NA	NA	NA	NA	NA	NA
ENSG00000162456.9	0.19849710308500057	-1.814722921847541	3.7520098932356833	-0.48366688081479126	0.628622301344521	NA	KNCN	ENST00000481882.6	313	375	1037	687
ENSG00000079277.20	9.181802320332292	-0.15925801693030298	0.5902275338713885	-0.26982478415689354	0.7872950547768338	0.998665554108594	MKNK1	ENST00000371946.9	201	1362	2719	1562
ENSG00000142961.14	0.7678366940274136	-0.0026505595823516823	2.056405911841334	-0.0012889282058026839	0.9989715843693641	NA	MOB3C	ENST00000271139.12	58	807	2800	864
ENSG00000123472.12	54.60201369603978	0.1452073941486334	0.2451028020345465	0.5924346557579006	0.5535595653897076	0.998665554108594	ATPAF1	ENST00000576409.5	64	1056	4158	1119
ENSG00000186118.8	0	NA	NA	NA	NA	NA	TEX38	ENST00000334122.4	108	621	866	728
ENSG00000159658.10	4.630256270444087	1.4774968802587165	0.8918227986744185	1.6567157539085435	0.09757695641325223	NA	EFCAB14	ENST00000371933.7	978	1488	5767	2465
ENSG00000142973.13	1.3593803564102154	-0.6777150459491406	1.4874642997313503	-0.4556176884860646	0.6486649211455082	NA	CYP4B1	ENST00000371923.8	37	1539	2110	1575
ENSG00000187048.12	1.092529121220836	-1.8581698127487767	1.7701652169329256	-1.0497154700442777	0.2938489490037612	NA	CYP4A11	ENST00000310638.8	33	1560	2530	1592
ENSG00000186377.7	11.45696660925687	-0.775869006994345	0.535271239332397	-1.4494875681384027	0.1472014696438746	0.8907315292545233	CYP4X1	ENST00000371901.3	251	1530	2357	1780
ENSG00000186160.4	0.29388995663111156	-0.852941290235095	3.042030946726463	-0.2803854744321215	0.779181780019977	NA	CYP4Z1	ENST00000334194.3	4	1518	1906	1521
ENSG00000162365.11	0	NA	NA	NA	NA	NA	CYP4A22	ENST00000371891.7	32	1560	2535	1591
ENSG00000162366.7	0	NA	NA	NA	NA	NA	PDZK1IP1	ENST00000294338.6	124	345	846	468
ENSG00000162367.11	4.703560486059281	-0.2009298383545668	0.811583273701862	-0.24757759907750276	0.8044612445660715	NA	TAL1	ENST00000294339.3	578	996	5001	1573
ENSG00000123473.15	0.7320347538695468	1.1344966309569378	2.018393513055526	0.5620790116588765	0.5740621875521339	NA	STIL	ENST00000371877.7	149	3867	5009	4015
ENSG00000162368.13	21.887793203409615	0.23338893655267942	0.4045477377495226	0.5769132163512014	0.5639980820570534	0.998665554108594	CMPK1	ENST00000371873.9	150	687	2930	836
ENSG00000186790.5	0	NA	NA	NA	NA	NA	FOXE3	ENST00000335071.3	245	960	1981	1204
ENSG00000186564.5	0	NA	NA	NA	NA	NA	FOXD2	ENST00000334793.5	2120	1488	4675	3607
ENSG00000269113.3	0	NA	NA	NA	NA	NA	TRABD2B	ENST00000606738.2	107	1554	7034	1660
ENSG00000117834.12	0.48467566372333354	0.3669122143853248	2.540198735025764	0.14444232623460596	0.8851511957237305	NA	SLC5A9	ENST00000236495.9	51	2121	3272	2171
ENSG00000132122.11	5.889537232232993	0.2823424534490895	0.7172265703818562	0.3936586639543603	0.6938330634904849	NA	SPATA6	ENST00000371847.7	166	1467	4973	1632
ENSG00000186094.16	7.368263083776348	0.00725160449188383	0.6583831710791084	0.011014261619108897	0.9912120683889579	0.998665554108594	AGBL4	ENST00000371839.5	118	1512	2947	1629
ENSG00000162373.12	37.18174759740758	0.047771754922357676	0.2976582316176984	0.16049196645001243	0.8724935494456756	0.998665554108594	BEND5	ENST00000371833.3	88	1266	1716	1353
ENSG00000162374.16	582.5652400348102	0.309494850296984	0.1061724190047761	2.915021181565634	0.0035566440268584004	0.12250355224027455	ELAVL4	ENST00000357083.8	13	1209	1442	1221
ENSG00000142700.11	0	NA	NA	NA	NA	NA	DMRTA2	ENST00000404795.3	394	1629	3137	2022
ENSG00000185104.19	45.22351556609258	-0.011689883302348736	0.2708159061543934	-0.04316542358366602	0.965569667368595	0.998665554108594	FAF1	ENST00000396153.6	453	1953	6817	2405
ENSG00000123080.10	0	NA	NA	NA	NA	NA	CDKN2C	ENST00000262662.5	2035	507	2904	2541
ENSG00000204006.9	0	NA	NA	NA	NA	NA	C1orf185	ENST00000371759.6	1	600	915	600
ENSG00000123091.4	12.962553869608918	-0.07647639054647573	0.4829731260491121	-0.15834502257315883	0.8741849327379538	0.998665554108594	RNF11	ENST00000242719.3	487	465	3084	951
ENSG00000085831.15	1.3495815466211312	-2.4471326074215227	1.6998317794684359	-1.4396322253645473	0.14997147739786518	NA	TTC39A	ENST00000447632.6	50	1842	2790	1891
ENSG00000085832.16	128.65535623686932	-0.4332553409129089	0.1680398633275835	-2.578289057926118	0.009929090115656836	0.2519534944382512	EPS15	ENST00000371733.7	98	2691	5225	2788
ENSG00000117859.18	51.516459133164105	-0.029580391018732482	0.272165175704855	-0.10868543685695647	0.913451993127294	0.998665554108594	OSBPL9	ENST00000447887.5	20	2241	2940	2260
ENSG00000078618.21	110.67743919822443	-0.3267615810366158	0.18065859190863023	-1.808724277015723	0.07049384943700496	0.7264395287734201	NRDC	ENST00000354831.11	191	3660	3895	3850
ENSG00000169213.6	28.3006865222731	-1.2095554719503276	0.3619211751542774	-3.3420411818532756	8.316472097160733e-4	0.04659329810383975	RAB3B	ENST00000371655.3	214	660	12844	873
ENSG00000117862.12	10.817820175372482	0.6164612311745518	0.5519710899967821	1.116836084980729	0.2640644168478	0.9618858344445017	TXNDC12	ENST00000371626.8	1076	519	2396	1594
ENSG00000285839.1	0	NA	NA	NA	NA	NA	NA	NA	NA	NA	NA	NA
ENSG00000198841.3	3.634018365733227	0.3658136722023153	0.9248356954143307	0.39554449943503645	0.6924410875653015	NA	KTI12	ENST00000371614.1	56	1065	1714	1120
ENSG00000134717.17	6.916673627957234	0.8354569103058882	0.6999689128154364	1.1935628783076777	0.2326490021986034	0.9451950096105671	BTF3L4	ENST00000313334.12	269	477	4703	745
ENSG00000157077.14	39.18821930433616	-0.2781768510261088	0.2882257607483521	-0.9651352825085716	0.3344770569276909	0.9935348558041641	ZFYVE9	ENST00000287727.7	453	4278	5194	4730
ENSG00000154222.14	17.665756433861123	-0.2141181616371654	0.41428855685862154	-0.5168333956910003	0.6052724653070305	0.998665554108594	CC2D1B	ENST00000371586.6	140	2577	5642	2716
ENSG00000085840.12	0.8902682690152569	-0.9022522079977043	1.829188263073115	-0.493252786611413	0.6218339839730365	NA	ORC1	ENST00000371568.7	220	2586	3157	2805
ENSG00000134748.12	26.67437812209657	-0.2935661079918027	0.3393086152724835	-0.8651890779609381	0.38693501911109446	0.998665554108594	PRPF38A	ENST00000257181.9	187	939	5274	1125
ENSG00000134744.13	66.29218007411664	0.3724729467093047	0.23952238128877718	1.5550653124988656	0.11993051515681102	0.8424187771283035	TUT4	ENST00000257177.8	146	4938	5743	5083
ENSG00000116157.5	1.821976501385572	2.7553346770786535	1.558595517747936	1.7678317727102948	0.07708903154185892	NA	GPX7	ENST00000361314.4	39	564	1228	602
ENSG00000182183.14	5.839309765287713	-0.5163710504124711	0.7238656661775992	-0.7133520410481526	0.4756279420642365	NA	SHISAL2A	ENST00000517870.1	151	573	748	723
ENSG00000162377.5	29.739693714727775	0.11853781501720402	0.34297219160662995	0.34561931817830965	0.7296288258940014	0.998665554108594	COA7	ENST00000371538.4	41	696	4005	736
ENSG00000162378.12	62.3438889597665	-0.2627138226202978	0.24239064911486063	-1.0838447092726202	0.2784336580396866	0.9699517908441929	ZYG11B	ENST00000294353.6	146	2235	8093	2380
ENSG00000203995.9	0	NA	NA	NA	NA	NA	ZYG11A	ENST00000371528.1	149	2280	4469	2428
ENSG00000121310.16	0.11472017899506465	0.10883371621799334	4.080472856796901	0.026671839278800125	0.9787214741389535	NA	ECHDC2	ENST00000371522.8	95	879	1509	973
ENSG00000116171.17	43.60506750278708	0.4275716841371017	0.2740314981046446	1.56030123213728	0.11868871236482313	0.8384936008407138	SCP2	ENST00000371514.7	169	1644	2811	1812
ENSG00000174348.13	0.19849710308500057	-1.814722921847541	3.7520098932356833	-0.48366688081479126	0.628622301344521	NA	PODN	ENST00000312553.9	8	1986	3010	1993
ENSG00000162383.12	0.1877681767579691	-1.8147221247558167	3.8342613253018007	-0.47329119504210554	0.6360054430717719	NA	SLC1A7	ENST00000620347.5	129	1860	2477	1988
ENSG00000157184.6	10.040231341198522	-0.5414826861485365	0.5597620698204767	-0.9673443688712193	0.33337191037508473	0.9935337508593416	CPT2	ENST00000371486.3	516	1977	3094	2492
ENSG00000162384.13	20.252686792984584	0.28447948053593636	0.39882750280034884	0.7132895262700713	0.47566661725601517	0.998665554108594	C1orf123	ENST00000294360.4	43	483	1085	525
ENSG00000162385.10	19.299893554349413	0.5577611425158929	0.4102751392641648	1.3594807219278426	0.17399430725343193	0.9191044976216826	MAGOH	ENST00000371470.7	163	441	756	603
ENSG00000157193.16	49.693097471179925	-0.10650379244478565	0.2598384117989444	-0.40988471145365246	0.6818905209926425	0.998665554108594	LRP8	ENST00000306052.10	103	2892	7648	2994
ENSG00000143006.7	0.16707677228520101	0.10883426093833813	4.0208191991403215	0.027067683362039168	0.9784057502528954	NA	DMRTB1	ENST00000371445.3	56	1029	1910	1084
ENSG00000174332.5	0.5752338672681009	0.37753172876125146	2.4122193327331183	0.15650804370823795	0.875632579411954	NA	GLIS1	ENST00000312233.4	568	1863	2812	2430
ENSG00000058804.11	6.207635079443708	1.2758241842593219	0.7858063437273829	1.623586007473031	0.1044641937662251	0.8031368642545984	NDC1	ENST00000371429.3	600	2025	5134	2624
ENSG00000058799.14	14.081186389016862	-0.09048230070005098	0.4814222605018548	-0.18794789548312207	0.8509174965385474	0.998665554108594	YIPF1	ENST00000072644.6	392	921	1858	1312
ENSG00000211452.10	0	NA	NA	NA	NA	NA	DIO1	ENST00000361921.7	25	750	1861	774
ENSG00000081870.11	10.19951692869028	-0.4244439133590166	0.5388940992756436	-0.7876202651495616	0.4309188573635042	0.998665554108594	HSPB11	ENST00000194214.9	391	435	915	825
ENSG00000116212.14	16.003583019375714	-0.22885696137542846	0.44376469434327365	-0.5157169200089551	0.6060521354062318	0.998665554108594	LRRC42	ENST00000371370.7	522	1287	2037	1808
ENSG00000203985.10	0.48029405436526623	0.1657985836510866	2.445605222100186	0.06779450017231545	0.9459492219180279	NA	LDLRAD1	ENST00000371360.1	19	618	785	636
ENSG00000116209.11	65.66875047148393	0.5917806456688025	0.24012327062105016	2.4644868618448874	0.01372095936978148	0.3130359080961486	TMEM59	ENST00000234831.9	251	972	6691	1222
ENSG00000116205.13	2.143467250870428	0.12446380360035489	1.2701867511766494	0.09798858591861133	0.9219413568655881	NA	TCEANC2	ENST00000234827.5	201	627	10436	827
ENSG00000256407.2	0	NA	NA	NA	NA	NA	NA	NA	NA	NA	NA	NA
ENSG00000157211.11	0.11472017899506465	0.10883371621799334	4.080472856796901	0.026671839278800125	0.9787214741389535	NA	CDCP2	ENST00000371330.1	849	1350	2723	2198
ENSG00000215883.10	0.37718980482637665	1.6099288391927182	2.5410755411531443	0.6335619752815888	0.5263667228897979	NA	CYB5RL	ENST00000534324.5	1	948	1148	948
ENSG00000116221.15	33.83273001603666	-0.2243236214900713	0.3119025359070365	-0.7192106368668052	0.47201114651585346	0.998665554108594	MRPL37	ENST00000605337.5	49	1452	1582	1500
ENSG00000157216.15	48.182455356863635	0.10619575378492567	0.26639503601754966	0.39864013749088656	0.690158382439871	0.998665554108594	SSBP3	ENST00000371320.7	412	1167	2077	1578
ENSG00000162390.17	0.476823483387737	-2.772262526579714	2.556060008239706	-1.0845842889615496	0.2781058165762987	NA	ACOT11	ENST00000371316.3	83	1824	6369	1906
ENSG00000162391.11	0	NA	NA	NA	NA	NA	FAM151A	ENST00000302250.6	162	1758	2005	1919
ENSG00000184313.19	0	NA	NA	NA	NA	NA	MROH7	ENST00000421030.6	286	3972	4329	4257
ENSG00000271723.5	0	NA	NA	NA	NA	NA	NA	NA	NA	NA	NA	NA
ENSG00000243725.6	18.49206253582887	-0.03178664459426848	0.41049747665616865	-0.07743444576857379	0.9382779392748243	0.998665554108594	TTC4	ENST00000371281.3	88	1164	2395	1251
ENSG00000162396.5	3.0747806364191166	-0.64007659673871	1.0437364808104581	-0.6132549819871128	0.5397077549212375	NA	PARS2	ENST00000371279.3	84	1428	2347	1511
ENSG00000006555.10	0.4561320789149689	-0.8529419800075534	2.6586262881131475	-0.3208205620402913	0.7483463761593356	NA	TTC22	ENST00000371276.8	105	1710	3345	1814
ENSG00000162398.11	0.2294403579901293	0.9544283611678432	3.5363014242657567	0.2698945159534899	0.7872414063075179	NA	LEXM	ENST00000371273.3	16	1257	1651	1272
ENSG00000116133.12	121.66307318596363	-0.12441832066324149	0.17787292167988486	-0.6994787036059104	0.48425291753612076	0.998665554108594	DHCR24	ENST00000371269.8	77	1551	4227	1627
ENSG00000143001.4	0	NA	NA	NA	NA	NA	TMEM61	ENST00000371268.3	275	633	1097	907
ENSG00000162399.7	0.09539285354611099	0.10883371621799316	4.080472856796901	0.02667183927880008	0.9787214741389535	NA	BSND	ENST00000371265.5	995	963	5113	1957
ENSG00000169174.10	0.501230316855603	1.9558534866757513	2.6610716694698717	0.734987151648339	0.4623473190638975	NA	PCSK9	ENST00000302118.5	291	2079	3637	2369
ENSG00000162402.13	58.46644979046731	-0.16607546735417714	0.2378010184404909	-0.6983799667608955	0.48493960138131903	0.998665554108594	USP24	ENST00000294383.6	1	7863	10549	7863
ENSG00000284686.1	0	NA	NA	NA	NA	NA	NA	NA	NA	NA	NA	NA
ENSG00000162407.8	0.19849710308500057	-1.814722921847541	3.7520098932356833	-0.48366688081479126	0.628622301344521	NA	PLPP3	ENST00000371250.3	553	936	3292	1488
ENSG00000162409.10	15.801027837789526	-0.25387525897945107	0.46007549762876454	-0.5518121705848881	0.5810770479361411	0.998665554108594	PRKAA2	ENST00000371244.8	67	1659	9347	1725
ENSG00000187889.12	0	NA	NA	NA	NA	NA	FYB2	ENST00000343433.6	82	2187	3135	2268
ENSG00000157131.10	0.19849710308500057	-1.814722921847541	3.7520098932356833	-0.48366688081479126	0.628622301344521	NA	C8A	ENST00000361249.3	97	1755	2356	1851
ENSG00000021852.12	0.21011303254117564	0.8720993008102295	3.3658517487287454	0.25910211319901844	0.7955564543667359	NA	C8B	ENST00000371237.8	68	1776	2037	1843
ENSG00000173406.15	23.44724560671696	-0.47343136206058417	0.36084948050684895	-1.3119912529612148	0.18952308588749803	0.92529621086065	DAB1	ENST00000371236.6	265	1668	5298	1932
ENSG00000162600.11	0.5184956646198972	4.781757035466428e-4	2.522763692543166	1.8954438933779008e-4	0.9998487654590661	NA	OMA1	ENST00000371226.7	115	1575	1935	1689
ENSG00000184292.6	0	NA	NA	NA	NA	NA	TACSTD2	ENST00000371225.3	618	972	2351	1589
ENSG00000162601.9	24.728502289748917	0.37232646671986824	0.37238360850186647	0.9998465512963148	0.3173847737484933	0.9896696262630528	MYSM1	ENST00000472487.5	41	2487	7785	2527
ENSG00000177606.6	55.553519587463455	0.24720267234720084	0.2483241933645834	0.9954836417580305	0.31950109639397667	0.9896696262630528	JUN	ENST00000371222.3	1258	996	3540	2253
ENSG00000172456.17	3.4958214698082433	-1.0751119639069187	0.9292145822339344	-1.157011506774066	0.24726765916892807	NA	FGGY	ENST00000371218.8	185	1728	2052	1912
ENSG00000134709.10	11.280838646829162	-0.7483882637205826	0.5183753398156773	-1.4437188774965506	0.14881806911293388	0.8920364745442281	HOOK1	ENST00000371208.3	258	2187	5857	2444
ENSG00000134716.10	0.16707677228520101	0.10883426093833813	4.0208191991403215	0.027067683362039168	0.9784057502528954	NA	CYP2J2	ENST00000371204.3	45	1509	1896	1553
ENSG00000162598.13	0	NA	NA	NA	NA	NA	C1orf87	ENST00000371201.3	109	1641	2028	1749
ENSG00000162599.15	2.0719915147570456	-0.8770951211125837	1.2114256139461697	-0.7240189665921641	0.4690540910505443	NA	NFIA	ENST00000371189.8	83	1665	1989	1747
ENSG00000162604.12	5.621744271048253	2.089528665335482	0.877972079789703	2.379948877002988	0.017315040056306904	NA	TM2D1	ENST00000606498.5	22	624	969	645
ENSG00000132849.20	9.267303779317475	0.08964559622374889	0.5680767783207933	0.157805422866847	0.8746101253740225	0.998665554108594	PATJ	ENST00000371158.6	115	5406	8505	5520
ENSG00000240563.1	0	NA	NA	NA	NA	NA	L1TD1	ENST00000498273.1	296	2598	3849	2893
ENSG00000132854.18	0	NA	NA	NA	NA	NA	KANK4	ENST00000371153.8	380	2988	4665	3367
ENSG00000162607.12	13.21849571639887	0.3621401490053974	0.49580360636347637	0.7304104777727464	0.4651393156798809	0.998665554108594	USP1	ENST00000339950.4	816	2358	3996	3173
ENSG00000116641.17	82.091605467188	-0.17637183655124694	0.2126889120632597	-0.829247913491555	0.40696413777394574	0.998665554108594	DOCK7	ENST00000251157.10	1	6396	7084	6396
ENSG00000132855.4	0	NA	NA	NA	NA	NA	ANGPTL3	ENST00000371129.3	81	1383	2805	1463
ENSG00000125703.14	2.2254626147237806	0.1439124122536597	1.148387051330773	0.12531699315739517	0.900272599639462	NA	ATG4C	ENST00000317868.8	208	1377	2938	1584
ENSG00000187140.5	0	NA	NA	NA	NA	NA	FOXD3	ENST00000371116.3	19	1437	2086	1455
ENSG00000088035.16	4.015040469200632	0.14040296139292302	0.9135609252255699	0.15368757300806812	0.8778560836672832	NA	ALG6	ENST00000371108.8	306	1524	3371	1829
ENSG00000142856.16	2.8637820016090494	0.20662201672120548	1.0209365183797778	0.20238478397179266	0.8396159229077431	NA	ITGB3BP	ENST00000371092.7	62	651	1044	712
ENSG00000203965.12	16.500958559029858	-0.2848885765050429	0.43700931937742993	-0.6519050369701486	0.5144624353481374	0.998665554108594	EFCAB7	ENST00000371088.4	247	1890	2313	2136
ENSG00000079739.16	16.668733194699698	-0.08830352996381317	0.44363877743646174	-0.1990437591458291	0.8422285145253915	0.998665554108594	PGM1	ENST00000371083.4	369	1743	2657	2111
ENSG00000185483.11	1.1430685948438815	-0.944990981922335	1.663862257015124	-0.5679502482480707	0.5700687508950188	NA	ROR1	ENST00000371079.5	376	2814	5832	3189
ENSG00000177414.13	0.16707677228520101	0.10883426093833813	4.0208191991403215	0.027067683362039168	0.9784057502528954	NA	UBE2U	ENST00000371076.7	245	681	1136	925
ENSG00000158966.14	8.359564384908388	-0.5746224845228489	0.6587098187775172	-0.8723454063418641	0.38301997374552743	0.998665554108594	CACHD1	ENST00000290039.5	107	3672	5275	3778
ENSG00000162437.14	2.9144611083373526	0.3506605263815747	1.0366554654969626	0.33826139740021666	0.7351662113002719	NA	RAVER2	ENST00000371072.8	79	2037	4362	2115
ENSG00000162434.11	73.49006693544078	0.009526722024917887	0.21178471422734663	0.04498304827935383	0.9641208207894029	0.998665554108594	JAK1	ENST00000342505.4	250	3465	5047	3714
ENSG00000162433.14	0	NA	NA	NA	NA	NA	AK4	ENST00000395334.6	359	672	6998	1030
ENSG00000116675.15	238.34551703715425	-0.5349356930069284	0.14357027975577574	-3.7259500637380927	1.9458092659905906e-4	0.015517390650944783	DNAJC6	ENST00000371069.4	202	2913	5365	3114
ENSG00000213625.8	6.153345500976473	-0.09291531153869523	0.7070704689066851	-0.13140884201028288	0.8954518944066346	0.998665554108594	LEPROT	ENST00000613538.1	115	423	4625	537
ENSG00000116678.19	0.615705637833099	-0.7926470101328773	2.2503491021388164	-0.35223290883157454	0.7246635987171384	NA	LEPR	ENST00000349533.10	186	3498	8227	3683
ENSG00000184588.17	41.62689795423974	-0.001361392385029699	0.2777261561445992	-0.004901923549184488	0.9960888465452988	0.9988125353680077	PDE4B	ENST00000329654.8	188	2211	3998	2398
ENSG00000118473.21	113.38829598341823	-0.1507304292286256	0.1748077926842382	-0.8622637864943214	0.3885423757722586	0.998665554108594	SGIP1	ENST00000371037.8	78	2487	7768	2564
ENSG00000152760.9	0	NA	NA	NA	NA	NA	TCTEX1D1	ENST00000282670.6	129	540	2001	668
ENSG00000172410.4	0.09539285354611099	0.10883371621799316	4.080472856796901	0.02667183927880008	0.9787214741389535	NA	INSL5	ENST00000304526.2	36	408	715	443
ENSG00000152763.16	4.847778401652052	-0.9730538178727048	0.8287221814762752	-1.1741616667473762	0.2403302769761856	NA	WDR78	ENST00000371026.7	57	2547	3848	2603
ENSG00000198160.14	18.66001593830166	0.07037126039721076	0.4473729570692272	0.1572988695119571	0.8750093111673874	0.998665554108594	MIER1	ENST00000401041.5	71	1698	2552	1768
ENSG00000116704.7	1.7383872809036829	-0.3564006655620888	1.3005981052613693	-0.27402828292638964	0.7840628866310568	NA	SLC35D1	ENST00000235345.5	87	1068	6162	1154
ENSG00000203963.11	0	NA	NA	NA	NA	NA	C1orf141	ENST00000371007.6	111	1203	2153	1313
ENSG00000162594.15	0.11472017899506465	0.10883371621799334	4.080472856796901	0.026671839278800125	0.9787214741389535	NA	IL23R	ENST00000347310.9	172	1890	2912	2061
ENSG00000081985.11	0.7599845136918171	-2.323996192327646	2.1148797015650245	-1.0988786693672807	0.2718209918690718	NA	IL12RB2	ENST00000262345.5	641	2589	4040	3229
ENSG00000142864.14	86.96095610742215	-0.08180310084577448	0.20934372977602486	-0.3907597372670055	0.6959748384020845	0.998665554108594	SERBP1	ENST00000370995.6	87	1227	3482	1313
ENSG00000116717.12	8.192520767057522	0.5695659204245054	0.6327173374492717	0.9001901587218171	0.3680190624911642	0.998665554108594	GADD45A	ENST00000370986.8	435	498	1496	932
ENSG00000172380.5	0	NA	NA	NA	NA	NA	GNG12	ENST00000370982.3	201	219	4404	419
ENSG00000162595.6	0	NA	NA	NA	NA	NA	DIRAS3	ENST00000370981.2	638	690	2039	1327
ENSG00000116729.13	1.0375406399568334	1.8302772404552163	1.786977482444011	1.0242307239104016	0.30572631017165414	NA	WLS	ENST00000354777.6	247	1632	2037	1878
ENSG00000116745.6	0.28905530662976786	-1.8147273456729796	3.257988198284016	-0.5570085694689739	0.5775215742398907	NA	RPE65	ENST00000262340.5	55	1602	2610	1656
ENSG00000024526.16	0	NA	NA	NA	NA	NA	DEPDC1	ENST00000456315.6	116	2436	5331	2551
ENSG00000033122.18	5.653046701519068	0.10074206465652716	0.7271630495852756	0.13854123186537545	0.8898126854635323	NA	LRRC7	ENST00000035383.9	31	4614	5000	4644
ENSG00000066557.5	59.63101426421527	0.12719841978408278	0.2339370399201698	0.5437292864246244	0.5866277760776404	0.998665554108594	LRRC40	ENST00000370952.3	81	1809	2884	1889
ENSG00000116754.13	115.68163142501791	-0.10689172763601973	0.18753170292189453	-0.5699928383871141	0.5686825554566651	0.998665554108594	SRSF11	ENST00000370950.7	83	1455	3784	1537
ENSG00000118454.12	23.763445827563874	0.3232926345588095	0.37858145812160754	0.8539579200811304	0.3931283053718199	0.998665554108594	ANKRD13C	ENST00000370944.8	315	1626	4069	1940
ENSG00000197568.13	2.4312180731582833	-0.726603615289519	1.091870475967432	-0.6654668582788861	0.5057519343567054	NA	HHLA3	ENST00000370940.5	117	366	775	482
ENSG00000116761.11	5.115223711450218	0.10978261649308098	0.7662290542231951	0.143276499224346	0.8860718152309015	NA	CTH	ENST00000370938.7	145	1218	1805	1362
ENSG00000050628.20	1.5036797112865943	1.22633586883908	1.5291733208699814	0.801960021210277	0.4225760845747017	NA	PTGER3	ENST00000356595.8	212	1257	1943	1468
ENSG00000132485.13	78.1094438320002	-0.018082908019953325	0.22037675558153627	-0.08205451601388562	0.9346033620612957	0.998665554108594	ZRANB2	ENST00000370920.7	303	993	3078	1295
ENSG00000172260.14	9.511064189560013	0.33755848290350887	0.5725395185481933	0.589581106574908	0.5554715214161667	0.998665554108594	NEGR1	ENST00000357731.9	241	1065	12811	1305
ENSG00000162620.15	0	NA	NA	NA	NA	NA	LRRIQ3	ENST00000354431.8	193	1875	2849	2067
ENSG00000254685.6	0.6826956909136633	2.5023824336700673	2.055850126042688	1.2172008075739018	0.22352782301255153	NA	FPGT	ENST00000370898.7	29	1824	3254	1852
ENSG00000259030.7	0	NA	NA	NA	NA	NA	FPGT-TNNI3K	ENST00000557284.6	6	2850	2855	2855
ENSG00000116783.14	0.19849710308500057	-1.814722921847541	3.7520098932356833	-0.48366688081479126	0.628622301344521	NA	TNNI3K	ENST00000326637.7	52	2508	3001	2559
ENSG00000162621.6	0.6994825619230349	-2.220359015535958	2.1592729204585415	-1.0282901223363856	0.3038133760598015	NA	NA	NA	NA	NA	NA	NA
ENSG00000178965.13	2.5087517539540056	-1.4835798498282053	1.1864080070129717	-1.2504803078356033	0.21112414442658742	NA	ERICH3	ENST00000326665.9	220	4593	7159	4812
ENSG00000116791.13	4.121907066999848	-1.405968613955	0.8782225381258446	-1.6009252244372851	0.10939348194404903	NA	CRYZ	ENST00000417775.5	506	990	2301	1495
ENSG00000162623.15	0.8260635283918434	2.7119923810731894	1.9713495651128108	1.3757034414736056	0.1689134660427354	NA	TYW3	ENST00000370867.7	90	780	3430	869
ENSG00000162624.14	0	NA	NA	NA	NA	NA	LHX8	ENST00000294638.9	665	1071	2373	1735
ENSG00000137968.16	4.569975261995985	0.13512825302758832	0.8663237821826449	0.15597892590128568	0.8760496325851046	NA	SLC44A5	ENST00000370855.5	115	2160	4406	2274
ENSG00000117054.13	29.635744629067176	0.23795595445337692	0.3276455277001381	0.7262603464288844	0.46767918354229127	0.998665554108594	ACADM	ENST00000370834.9	80	1365	2172	1444
ENSG00000137955.15	29.372708649180392	0.17481443217426093	0.3385072019788018	0.5164275121839454	0.605555854535794	0.998665554108594	RABGGTB	ENST00000319942.7	72	996	1496	1067
ENSG00000057468.6	0.4919099838214413	2.004134592969927	2.3104817854133657	0.8674098214591073	0.38571750243035097	NA	MSH4	ENST00000263187.3	105	2811	3266	2915
ENSG00000154007.6	0	NA	NA	NA	NA	NA	ASB17	ENST00000284142.6	141	888	1107	1028
ENSG00000184005.10	2.872588583356679	-0.4067388009745838	1.0182392719068227	-0.39945306785594475	0.689559398382295	NA	ST6GALNAC3	ENST00000328299.3	149	918	6861	1066
ENSG00000117069.14	3.71194552776653	0.5245758596632462	0.908827899913007	0.5772004355428113	0.5638040628784472	NA	ST6GALNAC5	ENST00000477717.5	236	1011	3751	1246
ENSG00000142892.14	9.333137935999932	0.27171198600917845	0.5779398776128788	0.47013884408090484	0.6382558235580894	0.998665554108594	PIGK	ENST00000370812.7	25	1188	4596	1212
ENSG00000154027.18	15.336182132075969	-1.0612482235798126	0.4524354109760743	-2.3456347532353816	0.01899471101770692	0.3900847355807165	AK5	ENST00000354567.6	264	1689	3251	1952
ENSG00000036549.12	16.83047287552965	-0.11158621546571273	0.4417330337125923	-0.2526100765611177	0.8005695425485213	0.998665554108594	AC118549.1	ENST00000370801.7	477	2712	4328	3188
ENSG00000077254.14	90.45215185099038	-0.13964831096994448	0.2076827646740228	-0.6724116524023327	0.5013216666826771	0.998665554108594	USP33	ENST00000370793.5	348	2829	4502	3176
ENSG00000180488.15	8.917727442761516	0.26659567470052603	0.5813362791878398	0.45859115325294253	0.6465277907527713	0.998665554108594	MIGA1	ENST00000443751.3	33	1902	6409	1934
ENSG00000162614.18	0.4991683391709435	-0.06795188833729096	2.4240488546535723	-0.028032392254322844	0.977636316009372	NA	NEXN	ENST00000334785.11	185	2028	2607	2212
ENSG00000162613.16	188.45151424419691	-0.19127044215811384	0.15109842363985496	-1.265866562671821	0.20556085938207233	0.9322051161470756	FUBP1	ENST00000370768.6	83	1935	2378	2017
ENSG00000162616.8	12.915256305320032	-0.1762719169312835	0.4811675721112247	-0.36634205451097446	0.7141098524509806	0.998665554108594	DNAJB4	ENST00000370763.5	258	1014	2988	1271
ENSG00000137960.5	0.28179695128026566	1.1586086705226502	3.0338809567996927	0.3818899577868788	0.7025429893180182	NA	GIPC2	ENST00000370759.3	194	948	3847	1141
ENSG00000122420.9	0.09539285354611099	0.10883371621799316	4.080472856796901	0.02667183927880008	0.9787214741389535	NA	PTGFR	ENST00000370757.7	238	1080	4379	1317
ENSG00000137959.15	0	NA	NA	NA	NA	NA	IFI44L	ENST00000370751.9	180	1359	5874	1538
ENSG00000137965.10	0	NA	NA	NA	NA	NA	IFI44	ENST00000370747.8	86	1335	1687	1420
ENSG00000162618.13	0	NA	NA	NA	NA	NA	ADGRL4	ENST00000370742.3	65	2073	3527	2137
ENSG00000117114.19	62.55413985337887	0.33333632894130405	0.241043364386381	1.3828894638517484	0.1666987614237392	0.9160150852988098	ADGRL2	ENST00000370730.5	646	4251	6173	4896
ENSG00000137941.16	50.06524855137732	-0.25155802227679375	0.26249797075221565	-0.9583236836304969	0.3378995648035278	0.9935348558041641	TTLL7	ENST00000260505.12	379	2664	7976	3042
ENSG00000142875.19	73.57962534944873	-0.758804813809172	0.2162788596492709	-3.508455773438465	4.5071616636228683e-4	0.030456026752969184	PRKACB	ENST00000370685.7	92	1197	4481	1288
ENSG00000203943.8	0.19849710308500057	-1.814722921847541	3.7520098932356833	-0.48366688081479126	0.628622301344521	NA	SAMD13	ENST00000370673.7	193	351	1567	543
ENSG00000137976.7	0	NA	NA	NA	NA	NA	DNASE2B	ENST00000370665.3	34	1086	1269	1119
ENSG00000117133.10	22.47615826398582	0.19892348723881315	0.37442241635433055	0.5312809237643616	0.5952241225833581	0.998665554108594	RPF1	ENST00000370654.5	16	1050	1385	1065
ENSG00000174021.10	0.7857999404525529	1.3146947726914677	1.9457186922779763	0.6756859446892969	0.49924006161695034	NA	GNG5	ENST00000370641.3	475	207	920	681
ENSG00000122432.17	0.16707677228520101	0.10883426093833813	4.0208191991403215	0.027067683362039168	0.9784057502528954	NA	NA	NA	NA	NA	NA	NA
ENSG00000117151.12	0.21011303254117564	0.8720993008102295	3.3658517487287454	0.25910211319901844	0.7955564543667359	NA	CTBS	ENST00000370630.5	50	1158	6600	1207
ENSG00000117155.16	6.741183969508469	1.9645654042220846	0.8041181180353091	2.443130381170966	0.014560475934370883	0.3246958461703058	SSX2IP	ENST00000342203.7	265	1845	5835	2109
ENSG00000171517.5	0.2294403579901293	0.9544283611678432	3.5363014242657567	0.2698945159534899	0.7872414063075179	NA	LPAR3	ENST00000440886.1	40	1062	3345	1101
ENSG00000153898.12	0.09539285354611099	0.10883371621799316	4.080472856796901	0.02667183927880008	0.9787214741389535	NA	MCOLN2	ENST00000370608.7	69	1701	2871	1769
ENSG00000162643.12	0.8738176895577381	-3.6922082011059008	1.9808795259418144	-1.8639236524747413	0.062332426656020595	NA	WDR63	ENST00000294664.10	181	2676	2995	2856
ENSG00000055732.12	0	NA	NA	NA	NA	NA	MCOLN3	ENST00000370589.6	54	1662	2756	1715
ENSG00000097096.8	1.5148411992392412	-1.2131568929270655	1.4308374883670274	-0.8478649062456461	0.39651321072714996	NA	SYDE2	ENST00000341460.5	51	3585	5512	3635
ENSG00000162642.13	35.965134832715265	0.041070229155149976	0.2994480127817237	0.13715311974732405	0.8909097656581284	0.998665554108594	C1orf52	ENST00000471115.5	10	549	1219	558
ENSG00000142867.13	17.015253759328285	0.4479521020445145	0.43257993549907514	1.0355360137721235	0.30041865665208634	0.9867554540572424	BCL10	ENST00000370580.6	553	702	3105	1254
ENSG00000153904.19	45.02921324382533	-0.449745509695308	0.2648854302644287	-1.6978869288746385	0.0895291047462801	0.7756180605853021	DDAH1	ENST00000284031.12	96	858	3920	953
ENSG00000142871.16	0.19849710308500057	-1.814722921847541	3.7520098932356833	-0.48366688081479126	0.628622301344521	NA	CYR61	ENST00000451137.6	225	1146	2290	1370
ENSG00000117174.10	22.26339435059167	-0.09085878012754771	0.3838712728834709	-0.23669075168104353	0.8128967102140515	0.998665554108594	ZNHIT6	ENST00000370574.3	135	1413	2797	1547
ENSG00000171502.14	3.3060395149365887	0.7147034352695287	0.9813635370094957	0.7282759225469503	0.46644469818671264	NA	COL24A1	ENST00000370571.6	368	5145	6825	5512
ENSG00000122417.15	28.073975396803537	0.07189672897123284	0.3325135419018645	0.21622195763820015	0.8288147386347327	0.998665554108594	ODF2L	ENST00000359242.7	283	1911	7560	2193
ENSG00000137975.7	0.4695651280382348	0.16690415576215278	2.46035376802812	0.06783746221012767	0.9459150219049038	NA	CLCA2	ENST00000370565.4	163	2832	4025	2994
ENSG00000016490.15	0	NA	NA	NA	NA	NA	CLCA1	ENST00000234701.7	352	2745	3310	3096
ENSG00000016602.9	0.19849710308500057	-1.814722921847541	3.7520098932356833	-0.48366688081479126	0.628622301344521	NA	CLCA4	ENST00000370563.3	43	2760	3211	2802
ENSG00000097033.14	110.33136009132883	-0.08436061793222827	0.18397220484884325	-0.4585508881710763	0.646556711221219	0.998665554108594	SH3GLB1	ENST00000616170.4	331	1185	6456	1515
ENSG00000183291.16	30.69235495851767	0.5528547265720083	0.33137398402003826	1.6683709441069974	0.09524211252930855	0.7879946996789259	SELENOF	ENST00000331835.9	255	498	1781	752
ENSG00000153936.16	2.2322870075874155	-0.9994477427963235	1.16993703127335	-0.8542748165758398	0.392952737365833	NA	HS2ST1	ENST00000370550.9	364	1071	6736	1434
ENSG00000267561.2	0	NA	NA	NA	NA	NA	NA	NA	NA	NA	NA	NA
ENSG00000143013.12	61.09445681908107	0.40594684079009274	0.23560769116148916	1.7229778823809725	0.08489252481051256	0.762855246733271	LMO4	ENST00000370544.9	781	498	5405	1278
ENSG00000065243.19	15.160785102188933	0.5319143507459064	0.47326294238236355	1.1239298561351474	0.26104278425488586	0.9612107846190722	PKN2	ENST00000370521.7	360	2955	6121	3314
ENSG00000137947.11	43.25994794219686	0.32425043395590863	0.28067702775022585	1.155243934834805	0.24799054777311072	0.9575436557009573	GTF2B	ENST00000370500.9	120	951	1351	1070
ENSG00000137944.17	12.09987984360503	-1.2132295466059724	0.5178421148317971	-2.3428560788263573	0.01913676342713439	0.39018818247937764	KYAT3	ENST00000260508.8	339	1365	2070	1703
ENSG00000213516.9	7.589466520685363	-0.5096190414215828	0.6421180989048747	-0.7936531337315245	0.4273973909429427	0.998665554108594	RBMXL1	ENST00000399794.6	717	1173	5084	1889
ENSG00000117226.11	0	NA	NA	NA	NA	NA	GBP3	ENST00000370481.8	222	1788	3067	2009
ENSG00000117228.9	0.11472017899506465	0.10883371621799334	4.080472856796901	0.026671839278800125	0.9787214741389535	NA	GBP1	ENST00000370473.4	221	1779	3035	1999
ENSG00000162645.12	0.19849710308500057	-1.814722921847541	3.7520098932356833	-0.48366688081479126	0.628622301344521	NA	GBP2	ENST00000370466.3	270	1776	2220	2045
ENSG00000213512.2	0.1877681767579691	-1.8147221247558167	3.8342613253018007	-0.47329119504210554	0.6360054430717719	NA	GBP7	ENST00000294671.2	140	1917	2454	2056
ENSG00000162654.8	0	NA	NA	NA	NA	NA	GBP4	ENST00000355754.6	99	1923	6127	2021
ENSG00000154451.14	0.1877681767579691	-1.8147221247558167	3.8342613253018007	-0.47329119504210554	0.6360054430717719	NA	GBP5	ENST00000370459.7	129	1761	2011	1889
ENSG00000183347.14	0	NA	NA	NA	NA	NA	GBP6	ENST00000370456.4	94	1902	2987	1995
ENSG00000197147.13	6.547102754906298	-0.48352113173973366	0.6752440769439005	-0.7160686753864036	0.4739489447351135	0.998665554108594	LRRC8B	ENST00000640258.1	818	2412	8034	3229
ENSG00000171488.14	1.486891439416971	0.48182520442620363	1.4538061017280908	0.33142329218007416	0.740324773505193	NA	LRRC8C	ENST00000370454.8	256	2412	7218	2667
ENSG00000271949.1	0.3655738753702016	-0.8529416629417818	2.841297460916889	-0.3001944269033123	0.7640288558442491	NA	NA	NA	NA	NA	NA	NA
ENSG00000171492.14	19.877275933477026	0.008074967938490229	0.41439711287881115	0.019486062251721628	0.984453355645369	0.998665554108594	LRRC8D	ENST00000337338.9	408	2577	3950	2984
ENSG00000162664.16	58.23957869146278	0.25510449801159263	0.2509398589162852	1.0165961641697456	0.3093455797184675	0.9896696262630528	ZNF326	ENST00000340281.8	144	1749	2729	1892
ENSG00000143032.7	0.1877681767579691	-1.8147221247558167	3.8342613253018007	-0.47329119504210554	0.6360054430717719	NA	BARHL2	ENST00000370445.4	43	1164	1979	1206
ENSG00000122482.20	48.790748872230495	0.05622648707439971	0.2611046639040759	0.21534079948512938	0.8295016222996565	0.998665554108594	ZNF644	ENST00000337393.9	284	3984	5763	4267
ENSG00000162669.15	4.026025777724345	1.4727026802972236	0.9548200568389809	1.5423876674446289	0.1229794166304253	NA	HFM1	ENST00000370425.7	100	4308	4931	4407
ENSG00000097046.12	20.011967296335516	0.05943123026539291	0.42371803580348116	0.14026127104241767	0.88845356300563	0.998665554108594	CDC7	ENST00000428239.5	260	1725	3313	1984
ENSG00000069702.10	0.357862479377423	1.5478705681019607	2.752388601283676	0.5623735570551539	0.5738615314344382	NA	TGFBR3	ENST00000212355.8	516	2556	6465	3071
ENSG00000137948.18	0.16707677228520101	0.10883426093833813	4.0208191991403215	0.027067683362039168	0.9784057502528954	NA	BRDT	ENST00000399546.6	350	2856	3357	3205
ENSG00000172031.6	0.11472017899506465	0.10883371621799334	4.080472856796901	0.026671839278800125	0.9787214741389535	NA	EPHX4	ENST00000370383.4	99	1089	1437	1187
ENSG00000230667.5	0	NA	NA	NA	NA	NA	SETSIP	ENST00000596516.2	1	909	909	909
ENSG00000189195.12	6.263882129920317	-0.09942255713057031	0.7071334660121974	-0.14059942275289708	0.8881864042842504	0.998665554108594	BTBD8	ENST00000636278.1	1	4065	4065	4065
ENSG00000203910.8	0	NA	NA	NA	NA	NA	C1orf146	ENST00000370375.7	149	543	830	691
ENSG00000174842.16	9.243318232918803	-0.7724021711532147	0.5788648178217171	-1.3343394647126485	0.18209262941303603	0.924890813222361	GLMN	ENST00000370360.7	83	1785	1995	1867
ENSG00000122484.8	13.622598851179651	-0.33179254948240755	0.4721910465297684	-0.7026659059311289	0.48226397966761897	0.998665554108594	RPAP2	ENST00000610020.1	110	1839	16993	1948
ENSG00000162676.11	0.11472017899506465	0.10883371621799334	4.080472856796901	0.026671839278800125	0.9787214741389535	NA	GFI1	ENST00000370332.5	320	1269	2855	1588
ENSG00000067208.14	7.36450048589333	0.49822288131531856	0.654650407987811	0.7610518151920177	0.44662611914215455	0.998665554108594	EVI5	ENST00000540033.2	11	2466	7436	2476
ENSG00000122406.13	82.43285133558787	-0.06781360788325017	0.21387484573219476	-0.3170714520031194	0.75118938610787	0.998665554108594	RPL5	ENST00000644759.1	133	894	1085	1026
ENSG00000154511.11	5.816079307235615	-0.17485613521912244	0.718571966928496	-0.24333837564877075	0.8077432781676805	NA	FAM69A	ENST00000370310.4	72	1287	2574	1358
ENSG00000143033.17	53.86465745791696	0.02678997847713577	0.2502704075405795	0.10704413174694645	0.9147539687943473	0.998665554108594	MTF2	ENST00000370298.8	290	1782	4125	2071
ENSG00000117500.12	5.525659921582033	0.13753908986778668	0.7500990841723798	0.18336122889623327	0.8545145949340474	NA	TMED5	ENST00000370282.7	487	690	6104	1176
ENSG00000122483.17	0.5117143851650658	-1.6617004954484824	2.5337784282930174	-0.6558191816985175	0.5119404730246309	NA	CCDC18	ENST00000343253.11	503	4365	4867	4867
ENSG00000117505.12	29.92110379069206	-0.648608446638066	0.3269941495907232	-1.983547557196011	0.04730630043024331	0.6268792985157392	DR1	ENST00000370272.8	759	531	10148	1289
ENSG00000137942.16	243.59436801105215	-0.29003653519576883	0.1431559074788171	-2.0260186275490293	0.04276287580834852	0.60276588639411	FNBP1L	ENST00000271234.11	152	1818	4212	1969
ENSG00000137936.17	3.0964240373077447	1.0319184991019146	1.0551882907181453	0.9779472613362742	0.3281004085844377	NA	BCAR3	ENST00000370244.5	290	2478	3217	2767
ENSG00000067334.13	45.662633197344135	-0.27510325919385664	0.2872938813226005	-0.9575674146883237	0.33828093702762835	0.9935348558041641	DNTTIP2	ENST00000436063.6	59	2271	5897	2329
ENSG00000023909.9	4.239472153133965	-0.3571340572593312	0.8290429654094666	-0.4307787076909116	0.6666292829185718	NA	GCLM	ENST00000370238.7	248	825	4857	1072
ENSG00000198691.12	0.6332158436149619	0.5674305800703092	2.345285651931439	0.2419451888954366	0.8088226344249824	NA	ABCA4	ENST00000370225.3	88	6822	7309	6909
ENSG00000137962.12	1.0457291118442829	-1.7359931470493706	1.8020041060800251	-0.9633680307342635	0.3353628638078363	NA	ARHGAP29	ENST00000260526.10	184	3786	6087	3969
ENSG00000117528.12	24.858385175197487	-0.3514949801718727	0.35264730379411585	-0.996732362306913	0.3188944368102249	0.9896696262630528	ABCD3	ENST00000370214.8	25	1980	3538	2004
ENSG00000117525.13	0	NA	NA	NA	NA	NA	F3	ENST00000334047.11	165	888	2287	1052
ENSG00000143036.16	0	NA	NA	NA	NA	NA	SLC44A3	ENST00000271227.10	103	1962	2388	2064
ENSG00000117519.15	111.94883732968376	-0.2920966654868927	0.17824826521297923	-1.638706918902589	0.10127431240891253	0.7960116523064636	CNN3	ENST00000370206.8	385	990	2165	1374
ENSG00000172339.9	4.037395448302699	0.045054047746682924	0.8879749704609173	0.05073797037690929	0.9595343196152081	NA	ALG14	ENST00000370205.5	48	651	9367	698
ENSG00000152078.9	0.48755240971476843	-2.7967049491090434	2.538398490234476	-1.1017596172816457	0.2705661908762351	NA	TMEM56	ENST00000370203.8	292	792	6822	1083
ENSG00000271092.5	0	NA	NA	NA	NA	NA	TMEM56-RWDD3	ENST00000604534.5	181	606	1491	786
ENSG00000122481.16	5.595578726081431	0.6264804004974455	0.8041588903500759	0.7790505185172033	0.4359499564406324	NA	RWDD3	ENST00000370202.4	77	804	1235	880
ENSG00000117569.18	138.37687958973305	-0.3524668754092816	0.16355458523365288	-2.1550412353511827	0.031158607558319007	0.5223787767163633	PTBP2	ENST00000370197.5	56	1614	3057	1669
ENSG00000188641.13	2.354174108397698	2.0434527485023986	1.3545652995412527	1.5085671759009696	0.1314094276983974	NA	DPYD	ENST00000370192.7	102	3078	4412	3179
ENSG00000162627.16	0.16707677228520101	0.10883426093833813	4.0208191991403215	0.027067683362039168	0.9784057502528954	NA	SNX7	ENST00000306121.7	10	1356	1734	1365
ENSG00000117598.11	3.9354940144271455	-1.7755214348356085	0.9267248323074712	-1.9159100662218163	0.05537654398034664	NA	PLPPR5	ENST00000263177.4	223	966	3288	1188
ENSG00000117600.12	1.2849237653544412	-0.11199784288085621	1.593616325256482	-0.07027905092703597	0.9439715562105839	NA	PLPPR4	ENST00000370185.7	498	2292	5369	2789
ENSG00000099260.10	0	NA	NA	NA	NA	NA	PALMD	ENST00000263174.8	376	1656	2510	2031
ENSG00000156869.13	0	NA	NA	NA	NA	NA	FRRS1	ENST00000287474.9	603	1881	2678	2483
ENSG00000162688.16	21.870381031006502	-0.10268078259708611	0.4023097097492505	-0.25522819884482645	0.7985468525839932	0.998665554108594	AGL	ENST00000294724.8	479	4599	7446	5077
ENSG00000117620.14	0.524939251662624	2.071538763932584	2.3978883841099927	0.8639012464716795	0.3876421420422387	NA	SLC35A3	ENST00000370153.6	102	1104	5708	1205
ENSG00000283761.1	0	NA	NA	NA	NA	NA	NA	NA	NA	NA	NA	NA
ENSG00000156875.13	3.6090049465842933	-0.04584778898336011	0.9091479832185975	-0.05042940184616388	0.9597802069025071	NA	MFSD14A	ENST00000370152.7	137	1473	2777	1609
ENSG00000156876.9	6.642536566487731	0.6924679418576396	0.7375644785921034	0.9388574991836021	0.3478039126764826	0.9954514406987122	SASS6	ENST00000287482.5	142	1974	3880	2115
ENSG00000122435.9	4.938950909200575	0.43028253575721115	0.8300092442670101	0.5184069198376197	0.6041743876777856	NA	TRMT13	ENST00000370141.6	7	1446	3129	1452
ENSG00000122477.12	1.483873909082718	-0.31823256618181206	1.445358862320671	-0.22017546955145606	0.8257345003361481	NA	LRRC39	ENST00000620882.4	281	1020	1951	1300
ENSG00000137992.14	12.144951391675406	-0.12916494467789655	0.49943291888257174	-0.25862321003367067	0.7959259733507331	0.998665554108594	DBT	ENST00000370132.8	15	1449	10799	1463
ENSG00000137996.12	32.98344924087196	-0.0452339374309993	0.33588221179825084	-0.13467202442435167	0.8928711929279765	0.998665554108594	RTCA	ENST00000260563.4	128	1140	1534	1267
ENSG00000079335.19	2.987798478386881	1.2433043595436624	1.0953577229947844	1.1350669588966622	0.25634726421266524	NA	CDC14A	ENST00000361544.11	489	1872	2446	2360
ENSG00000181656.6	1.7547782656792998	2.5795847956825133	1.5922097513579174	1.620128750927767	0.1052046225290703	NA	GPR88	ENST00000315033.4	440	1155	3491	1594
ENSG00000162692.11	0.11472017899506465	0.10883371621799334	4.080472856796901	0.026671839278800125	0.9787214741389535	NA	VCAM1	ENST00000294728.6	102	2220	3083	2321
ENSG00000162694.13	5.614765017564875	-0.11837039844540996	0.7507362389315563	-0.15767241849664013	0.8747149354434367	NA	EXTL2	ENST00000370114.7	1438	993	3985	2430
ENSG00000162695.11	4.832882285992391	1.4970701725914837	0.882365906871252	1.6966545975239322	0.08976198113819245	NA	SLC30A7	ENST00000370112.8	188	1131	7898	1318
ENSG00000117543.20	7.522019621105097	-0.2041480297938651	0.6731424868150758	-0.3032761024486457	0.7616794565876133	0.998665554108594	DPH5	ENST00000370109.7	114	858	1316	971
ENSG00000170989.9	0	NA	NA	NA	NA	NA	S1PR1	ENST00000305352.6	376	1149	2909	1524
ENSG00000118733.16	10.112464820277342	-0.1972173322299531	0.572603161723183	-0.3444223598704037	0.7305286756211498	0.998665554108594	OLFM3	ENST00000338858.9	1	1437	2189	1437
ENSG00000060718.21	0.35484494904317015	-0.8529416149564758	2.8679296843393365	-0.29740673894972486	0.7661559993872986	NA	COL11A1	ENST00000370096.8	289	5421	7261	5709
ENSG00000185946.15	9.487111512696778	0.5195932707715776	0.5938983603470745	0.8748858482584915	0.38163601991060625	0.998665554108594	RNPC3	ENST00000533099.5	237	1554	3641	1790
ENSG00000240038.6	0.28905530662976786	-1.8147273456729796	3.257988198284016	-0.5570085694689739	0.5775215742398907	NA	AMY2B	ENST00000361355.8	617	1536	2181	2152
ENSG00000243480.7	0	NA	NA	NA	NA	NA	AMY2A	ENST00000622339.4	296	1536	1862	1831
ENSG00000237763.9	0	NA	NA	NA	NA	NA	AMY1A	ENST00000370083.8	221	1536	1790	1756
ENSG00000174876.16	0	NA	NA	NA	NA	NA	AMY1B	ENST00000330330.9	296	1536	1862	1831
ENSG00000187733.6	0	NA	NA	NA	NA	NA	AMY1C	ENST00000370079.3	65	1536	1632	1600
ENSG00000198890.8	27.736695291130147	0.09134255237427351	0.338581136854642	0.2697803936239019	0.787329207357598	0.998665554108594	PRMT6	ENST00000370078.1	38	1128	2616	1165
ENSG00000162631.18	3.647739386282865	0.16455634262009528	0.9428593060675853	0.17452905386957032	0.8614496994607044	NA	NTNG1	ENST00000370068.5	847	1620	4034	2466
ENSG00000134215.15	34.04224560453806	0.012323582655320835	0.3063450185997184	0.040227788627512424	0.967911523435312	0.998665554108594	VAV3	ENST00000370056.8	276	2544	4990	2819
ENSG00000085491.16	34.79801087095089	0.4269602895572034	0.34354779182998263	1.24279736243655	0.21394251471693881	0.9376612741941073	SLC25A24	ENST00000565488.5	221	1434	4271	1654
ENSG00000196427.13	0	NA	NA	NA	NA	NA	NBPF4	ENST00000415641.7	205	1917	2485	2121
ENSG00000186086.18	0	NA	NA	NA	NA	NA	NBPF6	ENST00000495380.6	214	1917	2494	2130
ENSG00000162636.15	8.888007482537382	-0.305148350670194	0.5739485816306859	-0.5316649616995577	0.59495806354422065	0.998665554108594	FAM102B	ENST00000370035.7	341	1083	5600	1423
ENSG00000162639.15	11.743745794346363	0.6109194059301605	0.5275383661062327	1.1580568261591366	0.24684084712468285	0.9575436557009573	HENMT1	ENST00000370032.9	422	1182	1874	1603
ENSG00000134186.11	42.74217982057536	0.2919256597009844	0.3017717370274982	0.9673724338021203	0.33335788541934885	0.9935337508593416	PRPF38B	ENST00000370025.8	270	1641	3693	1910
ENSG00000143107.8	0.11472017899506465	0.10883371621799334	4.080472856796901	0.026671839278800125	0.9787214741389535	NA	FNDC7	ENST00000370017.7	278	2202	3332	2479
ENSG00000116266.10	4.131099291107865	-0.5012280192469196	0.8383973882426573	-0.5978406257890789	0.5499462802864663	NA	STXBP3	ENST00000370008.3	51	1779	2478	1829
ENSG00000162641.18	0	NA	NA	NA	NA	NA	AKNAD1	ENST00000370001.7	270	2511	3053	2780
ENSG00000274068.1	0.8695768645424888	0.16949459553865	1.872999412072102	0.09049367258003455	0.927894921874387	NA	NA	NA	NA	NA	NA	NA
ENSG00000121957.13	2.39487949770005	1.4314976526435343	1.2906764202149963	1.109106535319736	0.26738422592788164	NA	GPSM2	ENST00000406462.6	774	2055	7433	2828
ENSG00000121940.15	10.70798156564399	-0.18410031074177982	0.5321643640727954	-0.3459463338221507	0.7293830466447493	0.998665554108594	CLCC1	ENST00000356970.6	109	1656	4803	1764
ENSG00000085433.15	88.27666213605792	-0.5490476802739362	0.20680051737236177	-2.654962798208718	0.0079317155326254	0.2147142076293579	WDR47	ENST00000400794.7	135	2784	4134	2918
ENSG00000197780.9	22.146868326485937	0.00346814018689712	0.38341182444188027	0.0090454700815385	0.9927828574952733	0.998665554108594	TAF13	ENST00000338366.5	56	375	813	430
ENSG00000215717.5	17.449862188783765	-0.24125624541305946	0.414320771671518	-0.5822933869324137	0.5603690791364864	0.998665554108594	TMEM167B	ENST00000338272.8	1071	225	3730	1295
ENSG00000179902.12	1.2332650707251498	2.0549974678306353	1.7917727777253023	1.1469074055469817	0.25141989169461654	NA	C1orf194	ENST00000369949.8	181	474	731	654
ENSG00000116299.16	15.879239499297153	1.5832563833941076	0.5027765805529754	3.1490257196402704	0.0016381577705070064	0.07323723527539404	KIAA1324	ENST00000369939.7	184	3042	3442	3225
ENSG00000031698.12	435.3378562345003	-0.24587695193181316	0.10812956990159464	-2.2739103850646787	0.02297137517186447	0.4326438574922219	SARS	ENST00000369923.4	12	1611	1882	1622
ENSG00000143126.7	58.622117691231615	0.21617171806058494	0.23941799353077603	0.9029050610299978	0.36657628435827566	0.998665554108594	CELSR2	ENST00000271332.3	62	8772	10534	8833
ENSG00000134222.16	2.236074791959388	-3.0956863036829727	1.4100548326230005	-2.195436824200901	0.028132278032872965	NA	PSRC1	ENST00000369909.6	145	1002	1742	1146
ENSG00000221986.6	0.21011303254117564	0.8720993008102295	3.3658517487287454	0.25910211319901844	0.7955564543667359	NA	MYBPHL	ENST00000357155.1	51	1065	1372	1115
ENSG00000134243.11	57.524589952027995	0.44292655789320745	0.24586449497776028	1.8015067931352693	0.0716230375619064	0.7321098481501103	SORT1	ENST00000256637.7	60	2496	7028	2555
ENSG00000143106.12	60.35788506844458	0.1866062594449726	0.24170595560448901	0.7720383181220501	0.44009173294856363	0.998665554108594	PSMA5	ENST00000271308.8	22	726	3729	747
ENSG00000143028.8	0	NA	NA	NA	NA	NA	SYPL2	ENST00000369872.3	217	819	3624	1035
ENSG00000162650.16	39.18048546584037	0.13617992827147632	0.2852333787250777	0.47743335257664005	0.633053569009427	0.998665554108594	ATXN7L2	ENST00000369870.7	16	2169	2318	2184
ENSG00000174151.14	6.146901913933746	-0.3390566729762348	0.6996277754216385	-0.48462437439951345	0.6279428204306224	0.998665554108594	CYB561D1	ENST00000369868.7	27	756	1085	782
ENSG00000181754.6	8.719659095445705	0.5293864010067577	0.6131167925573417	0.8634348421589625	0.38789842964994903	0.998665554108594	AMIGO1	ENST00000369864.4	351	1482	5088	1832
ENSG00000156097.12	2.3553974030786944	0.045365132478248665	1.1462412646885218	0.03957729831910748	0.9684301265724967	NA	GPR61	ENST00000527748.5	684	1356	4921	2039
ENSG00000065135.10	79.746309730336	0.030130905515552503	0.21979014440910724	0.13708942953997166	0.8909601075889828	0.998665554108594	GNAI3	ENST00000369851.5	111	1065	27174	1175
ENSG00000134183.11	0	NA	NA	NA	NA	NA	GNAT2	ENST00000351050.7	188	1065	1339	1252
ENSG00000116337.15	43.63145760603948	-0.5910940067939279	0.28009430104409316	-2.1103392842715367	0.03482914213901949	0.547988708169567	AMPD2	ENST00000256578.7	361	2640	3899	3000
ENSG00000168765.16	6.201728007146841	2.5981798257762616	0.9235046280119645	2.8133912348326646	0.004902196698233431	0.15497944704557975	GSTM4	ENST00000369836.8	310	657	1412	966
ENSG00000213366.12	4.608159828912182	0.23916847406267203	0.8542267064162334	0.2799824358876155	0.7794909803295942	NA	GSTM2	ENST00000241337.8	51	657	1157	707
ENSG00000134184.12	0.2294403579901293	0.9544283611678432	3.5363014242657567	0.2698945159534899	0.7872414063075179	NA	GSTM1	ENST00000309851.9	55	657	1161	711
ENSG00000134201.11	0	NA	NA	NA	NA	NA	GSTM5	ENST00000256593.7	59	657	1555	715
ENSG00000134202.10	16.497668329570217	-0.02151841263791383	0.44546168040571427	-0.04830586688919112	0.9614724789128143	0.998665554108594	GSTM3	ENST00000256594.7	230	678	4046	907
ENSG00000198758.10	0.1877681767579691	-1.8147221247558167	3.8342613253018007	-0.47329119504210554	0.6360054430717719	NA	EPS8L3	ENST00000369805.7	231	1785	2325	2015
ENSG00000184371.13	0.21011303254117564	0.8720993008102295	3.3658517487287454	0.25910211319901844	0.7955564543667359	NA	CSF1	ENST00000329608.10	392	1665	4210	2056
ENSG00000168710.17	38.508986693241674	-0.3113677497247658	0.28583817896038927	-1.0893147684372644	0.27601510234718696	0.9684231118211333	AHCYL1	ENST00000369799.9	368	1593	4015	1960
ENSG00000143093.14	143.54024715145957	-0.16131320264748372	0.16347416140026474	-0.9867810378455472	0.323749992524884	0.9896696262630528	STRIP1	ENST00000369795.7	23	2514	3265	2536
ENSG00000156150.7	0.11472017899506465	0.10883371621799334	4.080472856796901	0.026671839278800125	0.9787214741389535	NA	ALX3	ENST00000369792.4	89	1032	1859	1120
ENSG00000186150.4	0	NA	NA	NA	NA	NA	UBL4B	ENST00000334179.4	68	525	1478	592
ENSG00000197106.6	23.363059134083432	-0.01769355581412045	0.38316057916720775	-0.04617791280245233	0.9631684467215473	0.998665554108594	SLC6A17	ENST00000331565.4	486	2184	6427	2669
ENSG00000116396.14	1.3775884608529232	2.139492955143928	1.6932672011452767	1.263529438057288	0.2063989740474184	NA	KCNC4	ENST00000369787.7	28	1908	18750	1935
ENSG00000162775.14	23.88258589278633	-0.16688289927541664	0.3575222500220314	-0.46677626151975965	0.6406599613633752	0.998665554108594	RBM15	ENST00000369784.7	901	2934	4244	3834
ENSG00000168679.17	0.6232088512001699	0.3331435569271957	2.38969155694188	0.13940860106378078	0.8891272760639016	NA	SLC16A4	ENST00000369779.8	251	1464	2632	1714
ENSG00000134248.13	49.944960402662126	0.6038901071876838	0.26039713585683766	2.3191119410763923	0.02038896746641597	0.4034084569214763	LAMTOR5	ENST00000256644.8	77	522	868	598
ENSG00000143125.5	0	NA	NA	NA	NA	NA	PROK1	ENST00000271331.3	18	318	1338	335
ENSG00000143105.7	0.16707677228520101	0.10883426093833813	4.0208191991403215	0.027067683362039168	0.9784057502528954	NA	KCNA10	ENST00000369771.4	389	1536	1959	1924
ENSG00000177301.14	13.845416596191118	0.2514919211312251	0.4886637549161142	0.5146522912762317	0.6067960174160573	0.998665554108594	KCNA2	ENST00000633222.1	675	1500	11877	2174
ENSG00000177272.8	2.098239503143397	-1.2789337440331687	1.2109732571452596	-1.0561205513721408	0.2909131422258645	NA	KCNA3	ENST00000369769.3	225	1728	2569	1952
ENSG00000143119.13	0	NA	NA	NA	NA	NA	CD53	ENST00000271324.5	113	660	1505	772
ENSG00000121931.15	24.07375100483921	-0.4909637767896191	0.35757269826420274	-1.3730460383942864	0.16973803484431976	0.918521482161107	LRIF1	ENST00000369763.4	392	2310	3475	2701
ENSG00000156171.14	3.4005898796226113	0.7543183602438304	0.9878630172180255	0.763585990260175	0.4451140006421151	NA	DRAM2	ENST00000286692.8	619	801	2246	1419
ENSG00000134255.13	7.041143265932849	-0.26241744620251634	0.6510639473881528	-0.40305940338924606	0.6869045246942018	0.998665554108594	CEPT1	ENST00000545121.5	209	1251	2251	1459
ENSG00000162777.16	0	NA	NA	NA	NA	NA	DENND2D	ENST00000357640.8	231	1416	2077	1646
ENSG00000064886.13	0	NA	NA	NA	NA	NA	CHI3L2	ENST00000445067.6	772	1173	2169	1944
ENSG00000134216.18	0	NA	NA	NA	NA	NA	CHIA	ENST00000369740.5	104	1431	1625	1534
ENSG00000173947.13	0	NA	NA	NA	NA	NA	PIFO	ENST00000369738.8	366	576	2627	941
ENSG00000085465.12	2.8821537744084096	0.27767984606399815	1.0482647825821276	0.26489475815452473	0.7910905365254373	NA	OVGP1	ENST00000369732.3	57	2037	2243	2093
ENSG00000116455.13	40.18933478000927	0.12719191788018092	0.30225072718162416	0.4208159201673337	0.6738895055182152	0.998665554108594	WDR77	ENST00000235090.9	208	1029	2576	1236
ENSG00000116459.10	62.91893665378455	-0.19191184201825845	0.23763198206169042	-0.8076010659560008	0.4193202729048917	0.998665554108594	ATP5PB	ENST00000369722.7	607	771	3156	1377
ENSG00000143110.11	0.5640709784552022	-1.6636607194603692	2.468130260572529	-0.6740570974055689	0.5002750139586011	NA	C1orf162	ENST00000343534.9	251	468	1107	718
ENSG00000121933.18	0	NA	NA	NA	NA	NA	TMIGD3	ENST00000369716.8	135	1044	1517	1178
ENSG00000282608.1	0	NA	NA	NA	NA	NA	ADORA3	ENST00000241356.4	407	957	1884	1363
ENSG00000116473.14	10.50985746477891	-0.278407625660449	0.5319640246228676	-0.5233579956047296	0.6007251490628289	0.998665554108594	RAP1A	ENST00000369709.3	180	555	5024	734
ENSG00000197852.10	0.5563595824624236	0.5841612750600196	2.2947645194031963	0.2545626229274032	0.7990609308395069	NA	INKA2	ENST00000357260.5	183	894	5980	1076
ENSG00000284755.1	0	NA	NA	NA	NA	NA	AL049557.1	ENST00000642547.1	86	849	5838	934
ENSG00000064703.11	31.716864923604028	-0.20380777522701118	0.31981162026513393	-0.6372744525606922	0.5239460887776399	0.998665554108594	DDX20	ENST00000369702.4	621	2475	4212	3095
ENSG00000171385.9	17.484639906217083	0.4207891359544398	0.4527720556230066	0.9293619840902971	0.35270152230689183	0.9954514406987122	KCND3	ENST00000315987.6	481	1968	2716	2448
ENSG00000143079.14	62.73844701233601	-0.22612407515427937	0.23720536439916787	-0.9532839854909817	0.3404462033134461	0.9935348558041641	CTTNBP2NL	ENST00000271277.10	226	1920	5897	2145
ENSG00000134245.17	0.3978812092991448	-0.07338296444228708	2.5798921296203177	-0.0284441987320946	0.9773078729576111	NA	WNT2B	ENST00000369684.4	486	1176	3818	1661
ENSG00000007341.18	12.7158241286031	0.17304467187490732	0.49133685529569265	0.3521915158812316	0.7246946392080545	0.998665554108594	ST7L	ENST00000358039.8	306	1728	4528	2033
ENSG00000116489.12	57.55649787976227	0.12917998036393447	0.2523456367980356	0.5119168375687962	0.6087092135405786	0.998665554108594	CAPZA1	ENST00000263168.3	673	861	3020	1533
ENSG00000155363.18	3.4409497376356644	1.673420044891538	1.0498982738122153	1.5938877952578152	0.11096116849879908	NA	MOV10	ENST00000413052.6	391	3012	3641	3402
ENSG00000155366.16	4.844934895373251	-0.7484341754636332	0.807889176377213	-0.9264069842101467	0.3542345158671065	NA	RHOC	ENST00000285735.6	1211	582	2199	1792
ENSG00000271810.5	0	NA	NA	NA	NA	NA	NA	NA	NA	NA	NA	NA
ENSG00000155367.15	0.09539285354611099	0.10883371621799316	4.080472856796901	0.02667183927880008	0.9787214741389535	NA	PPM1J	ENST00000309276.10	177	1518	1863	1694
ENSG00000184599.13	0	NA	NA	NA	NA	NA	FAM19A3	ENST00000369630.7	218	510	1282	727
ENSG00000155380.11	11.041446045837588	0.787046875608973	0.5587734538638126	1.4085258885630534	0.1589754066321954	0.9065355381561654	SLC16A1	ENST00000538576.5	833	1503	4374	2335
ENSG00000198799.11	25.975945512422307	0.24861196567758787	0.36980637575380204	0.6722760395107434	0.501407980523455	0.998665554108594	LRIG2	ENST00000361127.5	199	3198	11555	3396
ENSG00000081026.18	49.896215199968545	0.6717659824005977	0.263660282331991	2.5478467081163765	0.010839008764207354	0.2650467004993467	MAGI3	ENST00000307546.13	76	4446	6430	4521
ENSG00000116793.15	10.933704089642848	0.43882838707624244	0.5396926313184771	0.8131079833426264	0.41615614968220693	0.998665554108594	PHTF1	ENST00000369604.5	485	2289	3273	2773
ENSG00000081019.13	52.457890264272656	-0.058889263832311294	0.2614971044598792	-0.22520044324753322	0.8218233446439039	0.998665554108594	RSBN1	ENST00000261441.9	65	2409	6621	2473
ENSG00000134242.15	0.429546398116513	1.7567543558078906	2.596113174837822	0.6766863528272932	0.49860497708923407	NA	PTPN22	ENST00000359785.9	137	2424	3654	2560
ENSG00000188761.12	0.09539285354611099	0.10883371621799316	4.080472856796901	0.02667183927880008	0.9787214741389535	NA	BCL2L15	ENST00000393316.7	173	492	1084	664
ENSG00000134262.12	23.279869347339954	0.41650680798665785	0.3713077873249834	1.1217292559019627	0.26197757343629174	0.9616576172721398	AP4B1	ENST00000369569.5	282	2220	2818	2501
ENSG00000118655.5	10.599396835690264	-0.617908261868888	0.5447579375279029	-1.1342804194335183	0.2566769398853722	0.9575436557009573	DCLRE1B	ENST00000369563.3	447	1599	3940	2045
ENSG00000163349.21	39.72951826398735	-0.05501081180051594	0.28386317267359007	-0.19379340857213637	0.8463376483718756	0.998665554108594	HIPK1	ENST00000369558.5	233	3633	8157	3865
ENSG00000116774.11	0.4561320789149689	-0.8529419800075534	2.6586262881131475	-0.3208205620402913	0.7483463761593356	NA	OLFML3	ENST00000320334.4	75	1221	1780	1295
ENSG00000134207.16	73.41154176266207	1.0237680205521231	0.22560281852782113	4.537922120090326	5.681123209573422e-6	8.980232616275703e-4	SYT6	ENST00000609117.5	305	1278	4424	1582
ENSG00000197323.11	129.25144295413313	0.1430987667190006	0.16841119389637954	0.8496986655592903	0.3954926405405081	0.998665554108594	TRIM33	ENST00000358465.6	85	3384	8339	3468
ENSG00000116752.5	57.71535800006242	-0.10359803785731093	0.24213561967079592	-0.4278512925862016	0.6687593905044481	0.998665554108594	BCAS2	ENST00000369541.3	49	678	1299	726
ENSG00000175984.14	0.6928307922546004	-1.9865379967436119	2.319686914410452	-0.8563819472372589	0.391786546901394	NA	DENND2C	ENST00000393274.5	627	2787	6163	3413
ENSG00000116748.21	0	NA	NA	NA	NA	NA	AMPD1	ENST00000520113.6	17	2343	2375	2359
ENSG00000213281.4	20.031105856865704	0.2975368258268225	0.4028021014946695	0.7386675112238956	0.460108918471978	0.998665554108594	NRAS	ENST00000369535.4	255	570	4449	824
ENSG00000009307.15	244.9605678820827	0.012422469205931558	0.13433651503977814	0.09247276663573685	0.926322427569079	0.998665554108594	CSDE1	ENST00000610726.4	523	2535	4312	3057
ENSG00000052723.11	20.0369596166669	0.3654379492709428	0.40747101425039	0.896844036730382	0.36980214592311744	0.998665554108594	SIKE1	ENST00000369528.9	79	636	5506	714
ENSG00000198765.11	0.11472017899506465	0.10883371621799334	4.080472856796901	0.026671839278800125	0.9787214741389535	NA	SYCP1	ENST00000369522.7	241	2931	3522	3171
ENSG00000134200.3	0	NA	NA	NA	NA	NA	TSHB	ENST00000256592.2	39	417	537	455
ENSG00000134198.9	12.887948690609337	-0.051046944309683054	0.4843207087289471	-0.10539905353964901	0.9160591670483488	0.998665554108594	TSPAN2	ENST00000369516.6	33	666	3177	698
ENSG00000134259.3	0	NA	NA	NA	NA	NA	NGF	ENST00000369512.2	170	726	1047	895
ENSG00000173218.14	3.292673864096212	-0.8403364721894093	1.0096422714376203	-0.832311102617427	0.405233365340848	NA	VANGL1	ENST00000355485.6	272	1575	8691	1846
ENSG00000118729.11	0.1877681767579691	-1.8147221247558167	3.8342613253018007	-0.47329119504210554	0.6360054430717719	NA	CASQ2	ENST00000261448.5	241	1200	2674	1440
ENSG00000177551.5	100.96394279553593	-0.2571790442973113	0.1869934697718726	-1.3753370350903877	0.16902697976645922	0.9173677651089498	NHLH2	ENST00000369506.1	5546	408	7226	5953
ENSG00000163393.12	12.562010187242137	-0.3993486644326842	0.5131918504269828	-0.7781664188556785	0.4364709110190123	0.998665554108594	SLC22A15	ENST00000369503.8	131	1644	4720	1774
ENSG00000173212.4	0	NA	NA	NA	NA	NA	MAB21L3	ENST00000369500.3	266	1089	3229	1354
ENSG00000163399.15	57.870522822666295	-0.2648835308375538	0.2679731513967204	-0.9884704100277845	0.32292231914465724	0.9896696262630528	ATP1A1	ENST00000537345.5	364	3072	3763	3435
ENSG00000116815.15	0.19078570709222198	0.7765631614003545	3.796479644028238	0.20454822209355655	0.8379251126934926	NA	CD58	ENST00000369489.9	68	753	1098	820
ENSG00000143061.17	26.348096482366195	0.45617259458869897	0.35460969434219736	1.2864075682840574	0.19830085847470047	0.9291811678490309	IGSF3	ENST00000369483.5	769	3645	7326	4413
ENSG00000116824.4	0	NA	NA	NA	NA	NA	CD2	ENST00000369478.3	109	1056	1609	1164
ENSG00000134247.9	3.532879823805234	0.5809921516231864	0.9807431184680119	0.592399926833783	0.5535828153264578	NA	PTGFRN	ENST00000393203.2	148	2640	6178	2787
ENSG00000134256.12	0.11472017899506465	0.10883371621799334	4.080472856796901	0.026671839278800125	0.9787214741389535	NA	CD101	ENST00000369470.1	7	3066	3324	3072
ENSG00000116830.11	1.5685378363017977	-0.09365858974971071	1.4054141988357272	-0.06664127189500386	0.9468672885357284	NA	TTF2	ENST00000369466.8	45	3489	9462	3533
ENSG00000134253.9	2.5103011315896935	-0.12027981126550387	1.1043716328636746	-0.10891244186851674	0.9132719381677248	NA	TRIM45	ENST00000256649.8	528	1743	3515	2270
ENSG00000134258.16	0.35484494904317015	-0.8529416149564758	2.8679296843393365	-0.29740673894972486	0.7661559993872986	NA	VTCN1	ENST00000369458.7	80	849	2612	928
ENSG00000198162.12	13.100939620379508	0.11729688803981805	0.4965635311565855	0.23621728274449105	0.8132640692590233	0.998665554108594	MAN1A2	ENST00000356554.7	736	1926	8576	2661
ENSG00000183508.4	4.091559037941066	0.2802800188008124	0.8759902401182161	0.319957924146493	0.7490002268338664	NA	TENT5C	ENST00000369448.3	248	1176	5751	1423
ENSG00000196505.10	16.665802096019245	0.08174372320272788	0.4493907121068135	0.18189900458667826	0.8556619856910319	0.998665554108594	GDAP2	ENST00000369443.9	251	1494	8828	1744
ENSG00000065183.15	34.463495883615884	0.5254492471656457	0.3239413141953076	1.6220507361677456	0.10479248511229793	0.8031368642545984	WDR3	ENST00000349139.5	48	2832	9974	2879
ENSG00000155761.13	1.4606434510306197	1.1260950972302735	1.5349323935283992	0.7336447533312408	0.4631652776734699	NA	SPAG17	ENST00000336338.9	67	6672	6924	6738
ENSG00000092607.14	1.0744022064390444	0.07699178156378432	1.8255536866194544	0.04217448225604205	0.9663596046655971	NA	TBX15	ENST00000369429.4	554	1809	4047	2362
ENSG00000116874.11	7.111418591379069	-0.26478410411792946	0.6399339377837028	-0.41376787271974047	0.6790441146694484	0.998665554108594	WARS2	ENST00000235521.4	28	1083	2800	1110
ENSG00000116882.14	0.1877681767579691	-1.8147221247558167	3.8342613253018007	-0.47329119504210554	0.6360054430717719	NA	HAO2	ENST00000361035.8	284	1095	1668	1378
ENSG00000203859.9	0	NA	NA	NA	NA	NA	HSD3B2	ENST00000543831.5	250	1119	1783	1368
ENSG00000203857.9	0.1877681767579691	-1.8147221247558167	3.8342613253018007	-0.47329119504210554	0.6360054430717719	NA	HSD3B1	ENST00000369413.7	146	1122	1676	1267
ENSG00000143067.4	96.79331666802895	-0.693481045447753	0.1906076917705534	-3.638263697577012	2.7448230984120385e-4	0.02059082548062997	ZNF697	ENST00000421812.2	121	1638	5041	1758
ENSG00000092621.12	259.55799348699173	-0.8985493754622894	0.13608482487610113	-6.602862415264719	4.032938015197027e-11	3.5699567310524085e-8	PHGDH	ENST00000641597.1	834	1602	2585	2435
ENSG00000134240.11	0.9122641578299377	-0.7964577548291416	3.9386429405116306	-0.20221628790897242	0.8397476402494969	NA	HMGCS2	ENST00000369406.7	51	1527	2428	1577
ENSG00000134193.14	0	NA	NA	NA	NA	NA	REG4	ENST00000354219.5	441	477	1517	917
ENSG00000134249.6	0.28179695128026566	1.1586086705226502	3.0338809567996927	0.3818899577868788	0.7025429893180182	NA	ADAM30	ENST00000369400.1	160	2373	2963	2532
ENSG00000134250.19	0.6159504958506677	2.263950321145524	2.313644825158205	0.9785211180764174	0.3278166518320861	NA	NOTCH2	ENST00000256646.6	221	7416	11389	7636
ENSG00000265808.3	17.498235575771197	-0.2072414392552041	0.41868415814373044	-0.4949827578240016	0.620612291543263	0.998665554108594	SEC22B	ENST00000578049.3	135	648	6922	782
ENSG00000273136.6	0.16707677228520101	0.10883426093833813	4.0208191991403215	0.027067683362039168	0.9784057502528954	NA	NA	NA	NA	NA	NA	NA
ENSG00000263353.3	0	NA	NA	NA	NA	NA	PPIAL4A	ENST00000577856.2	76	495	660	570
ENSG00000198019.12	0	NA	NA	NA	NA	NA	FCGR1B	ENST00000369384.8	44	843	1044	886
ENSG00000188610.12	0	NA	NA	NA	NA	NA	FAM72B	ENST00000369390.7	852	450	2396	1301
ENSG00000171943.11	1.425483406361636	0.19894967900416868	1.559655136124845	0.12756004477918345	0.8984971523922974	NA	SRGAP2C	ENST00000367123.7	858	1380	7204	2237
ENSG00000203818.7	0.1877681767579691	-1.8147221247558167	3.8342613253018007	-0.47329119504210554	0.6360054430717719	NA	NA	NA	NA	NA	NA	NA
ENSG00000263513.5	0	NA	NA	NA	NA	NA	FAM72C	ENST00000584486.5	825	450	2297	1274
ENSG00000271567.1	0	NA	NA	NA	NA	NA	PPIAL4E	ENST00000581164.1	76	495	785	570
ENSG00000266338.6	3.5517781438623057	-0.27920812354033897	0.9518529989310752	-0.293331138163023	0.7692690550712273	NA	NBPF15	ENST00000577412.5	1068	2013	4707	3080
ENSG00000279782.1	0	NA	NA	NA	NA	NA	PPIAL4F	ENST00000581138.2	76	495	660	570
ENSG00000196369.11	1.61746837288346	-0.23387931773123383	1.3320952082236655	-0.1755725238611956	0.8606297897849161	NA	SRGAP2B	ENST00000619678.1	449	918	1477	1366
ENSG00000215784.5	0	NA	NA	NA	NA	NA	FAM72D	ENST00000400889.2	849	450	2397	1298
ENSG00000256374.2	0	NA	NA	NA	NA	NA	PPIAL4D	ENST00000544708.2	1	495	495	495
ENSG00000162825.16	0.09539285354611099	0.10883371621799316	4.080472856796901	0.02667183927880008	0.9787214741389535	NA	NBPF20	ENST00000392971.6	1201	15624	18450	16824
ENSG00000117262.18	0.33415354457040203	1.3662908437222665	3.077423035558894	0.44397238466570876	0.6570625496554132	NA	GPR89A	ENST00000313835.13	145	1368	2120	1512
ENSG00000174827.13	0	NA	NA	NA	NA	NA	PDZK1	ENST00000417171.5	87	1560	2230	1646
ENSG00000117281.15	0	NA	NA	NA	NA	NA	CD160	ENST00000235933.10	85	546	1425	630
ENSG00000265491.4	26.552154729734433	-0.3302335992770312	0.3398557819030526	-0.9716874535070696	0.3312060603831404	0.9930343427594474	RNF115	ENST00000582693.4	205	915	9117	1119
ENSG00000186141.8	30.414392563772967	-0.41221104212107806	0.32163520595464284	-1.2816104533631443	0.199979331352079	0.9291811678490309	POLR3C	ENST00000334163.3	162	1605	1851	1766
ENSG00000186364.11	1.745645636253185	-1.220982055627997	1.3354543346161813	-0.9142821465167625	0.36056860931555773	NA	NUDT17	ENST00000334513.5	13	987	1473	999
ENSG00000131788.15	20.42955198408386	0.16542774570119465	0.3930322807269449	0.42090116718968396	0.6738272528823714	0.998665554108594	PIAS3	ENST00000393045.6	91	1887	2901	1977
ENSG00000198483.12	0.4037754856248325	-0.852941821502808	2.7514621128141026	-0.3099958445840448	0.7565641163553191	NA	ANKRD35	ENST00000355594.8	88	3006	3342	3093
ENSG00000143127.12	1.5100510635069528	-0.7101847262097212	1.4711788688796779	-0.48273173387171897	0.6292862278835898	NA	ITGA10	ENST00000369304.7	176	3504	5269	3679
ENSG00000131779.10	32.97123010755401	0.32289368537805335	0.330413977862939	0.977239787089137	0.3284504548475917	0.9930343427594474	PEX11B	ENST00000369306.7	150	780	1740	929
ENSG00000265241.6	50.19771988579434	0.22861434464368993	0.2591906778602774	0.8820315087370916	0.37775976839245595	0.998665554108594	RBM8A	ENST00000583313.6	111	525	4961	635
ENSG00000280778.1	0	NA	NA	NA	NA	NA	NA	NA	NA	NA	NA	NA
ENSG00000271601.3	25.856695984430576	0.11649863536986033	0.3653378625045463	0.3188791727504307	0.7498181382486175	0.998665554108594	LIX1L	ENST00000604000.3	75	1014	3975	1088
ENSG00000272031.2	9.542818242571101	-0.5426662030219869	0.6044844051996859	-0.897734000007365	0.36932737849945035	0.998665554108594	ANKRD34A	ENST00000606888.2	1296	1491	3613	2786
ENSG00000121851.12	11.751505510464622	0.1561620816669347	0.5150782804305307	0.3031812592377335	0.7617517302620579	0.998665554108594	POLR3GL	ENST00000369314.1	108	657	1165	764
ENSG00000265972.5	9.363176389924252	2.396495271377627	0.7127176844215907	3.3624748252493744	7.724716928434538e-4	0.044383588578225934	TXNIP	ENST00000582401.5	335	1176	2926	1510
ENSG00000168509.19	0	NA	NA	NA	NA	NA	HJV	ENST00000336751.10	345	1281	2234	1625
ENSG00000271425.7	0.48755240971476843	-2.7967049491090434	2.538398490234476	-1.1017596172816457	0.2705661908762351	NA	NBPF10	ENST00000583866.8	36	11388	13042	11423
ENSG00000213240.8	0	NA	NA	NA	NA	NA	NA	NA	NA	NA	NA	NA
ENSG00000264343.5	0	NA	NA	NA	NA	NA	NOTCH2NLA	ENST00000578207.5	445	711	5042	1155
ENSG00000270339.3	0	NA	NA	NA	NA	NA	NA	NA	NA	NA	NA	NA
ENSG00000268043.7	3.027536790860527	0.0065020626099176	1.0651524066079312	0.0061043495462062315	0.9951294639918884	NA	NBPF12	ENST00000617931.4	1061	4374	7061	5434
ENSG00000131791.7	23.756448128540836	-0.21572082920924035	0.39198669095118877	-0.5503269222885491	0.5820951617588935	0.998665554108594	PRKAB2	ENST00000254101.3	140	819	5417	958
ENSG00000131781.12	0.6173145748744822	0.7695013545039768	2.2339875608126043	0.34445194234836013	0.7305064316192015	NA	FMO5	ENST00000254090.8	390	1602	2632	1991
ENSG00000131778.18	13.9411597822898	0.7173243479592437	0.4939414697977572	1.4522456441103233	0.14643331532637516	0.8898768337300734	CHD1L	ENST00000369258.8	21	2694	2967	2714
ENSG00000116128.10	51.45151199685355	-0.14445223495561343	0.25476070818234126	-0.5670114358931043	0.5707064120222349	0.998665554108594	BCL9	ENST00000234739.7	741	4281	6278	5021
ENSG00000162836.11	2.568326221345358	-1.4250272196493845	1.144380341767307	-1.2452391636234021	0.21304385064027678	NA	ACP6	ENST00000583509.6	449	1287	6923	1735
ENSG00000265107.2	0	NA	NA	NA	NA	NA	GJA5	ENST00000621517.1	145	1077	3183	1221
ENSG00000121634.5	0	NA	NA	NA	NA	NA	GJA8	ENST00000369235.1	1	1302	1302	1302
ENSG00000188092.14	0.16707677228520101	0.10883426093833813	4.0208191991403215	0.027067683362039168	0.9784057502528954	NA	GPR89B	ENST00000314163.11	145	1368	1934	1512
ENSG00000263956.6	0.357862479377423	1.5478705681019607	2.752388601283676	0.5623735570551539	0.5738615314344382	NA	NBPF11	ENST00000615281.4	1152	2598	5494	3749
ENSG00000236334.2	0	NA	NA	NA	NA	NA	PPIAL4G	ENST00000419275.2	428	495	3856	922
ENSG00000270629.5	0	NA	NA	NA	NA	NA	NA	NA	NA	NA	NA	NA
ENSG00000177144.7	0	NA	NA	NA	NA	NA	NA	NA	NA	NA	NA	NA
ENSG00000178104.19	28.305074283752596	-0.2799143814392553	0.3505757503445066	-0.7984419377671923	0.42461407456450223	0.998665554108594	PDE4DIP	ENST00000369356.8	292	7089	8307	7380
ENSG00000269713.7	0.5945611927170544	0.4525700064555865	2.25452590968913	0.2007384366312251	0.840903103319195	NA	NBPF9	ENST00000615421.4	871	3336	5835	4206
ENSG00000271383.6	0.28905530662976786	-1.8147273456729796	3.257988198284016	-0.5570085694689739	0.5775215742398907	NA	NA	NA	NA	NA	NA	NA
ENSG00000263464.2	0	NA	NA	NA	NA	NA	PPIAL4C	ENST00000585245.2	34	495	600	528
ENSG00000150337.13	0	NA	NA	NA	NA	NA	FCGR1A	ENST00000369168.4	55	1125	2180	1179
ENSG00000203814.6	2.060447820123239	0.6075472376648251	1.248233199954335	0.4867257477905983	0.6264526961876866	NA	HIST2H2BF	ENST00000545683.1	51	405	999	455
ENSG00000183598.3	1.049180604664403	0.4340464676760293	1.8731618863819937	0.23171860949743575	0.8167565764449365	NA	HIST2H3D	ENST00000331491.1	1	411	411	411
ENSG00000270882.2	0	NA	NA	NA	NA	NA	HIST2H4A	ENST00000578186.2	27	312	583	338
ENSG00000203811.1	0	NA	NA	NA	NA	NA	HIST2H3C	ENST00000369158.1	37	411	1656	447
ENSG00000203812.2	0	NA	NA	NA	NA	NA	HIST2H2AA3	ENST00000369159.2	39	393	549	431
ENSG00000272196.2	0	NA	NA	NA	NA	NA	HIST2H2AA4	ENST00000607355.2	54	393	564	446
ENSG00000203852.3	0	NA	NA	NA	NA	NA	HIST2H3A	ENST00000403683.1	37	411	1656	447
ENSG00000270276.2	0	NA	NA	NA	NA	NA	HIST2H4B	ENST00000579512.2	80	312	1132	391
ENSG00000184678.10	31.49865883142418	0.598913943500941	0.3434692055423461	1.743719477136943	0.08120801738079986	0.7598872831446515	HIST2H2BE	ENST00000369155.3	13	381	2194	393
ENSG00000184260.5	31.637144194155784	0.4564246453922442	0.34591383963183453	1.319474947513026	0.18701038015880464	0.92529621086065	HIST2H2AC	ENST00000331380.3	1	390	390	390
ENSG00000184270.4	9.870506484565254	-0.21872803509125904	0.5589059670594232	-0.391350330793666	0.6955383007529563	0.998665554108594	HIST2H2AB	ENST00000331128.4	1	393	393	393
ENSG00000178096.8	4.10578141925946	-0.828244927541021	0.8708326648118497	-0.9510953837726905	0.3415559578871206	NA	BOLA1	ENST00000369153.2	665	414	1096	1078
ENSG00000159164.9	168.17269881927248	0.07023019296832497	0.15664962013787648	0.44832660881342246	0.6539174997120564	0.998665554108594	SV2A	ENST00000369146.7	492	2229	4416	2720
ENSG00000143368.9	62.019315169381834	-0.42353342963449914	0.2341534462675783	-1.8087858042905218	0.07048428652945038	0.7264395287734201	SF3B4	ENST00000271628.8	586	1275	2085	1860
ENSG00000014914.20	0	NA	NA	NA	NA	NA	MTMR11	ENST00000439741.3	221	2130	2827	2350
ENSG00000264522.5	9.379428866285041	-0.20433191099345935	0.5768834657329566	-0.35419963152150047	0.7231892797178525	0.998665554108594	OTUD7B	ENST00000581312.5	296	2532	8872	2827
ENSG00000136631.14	44.13814687966454	-0.1700379466885166	0.26835445878718417	-0.6336319040756595	0.5263210747159452	0.998665554108594	VPS45	ENST00000369130.7	547	1713	2790	2259
ENSG00000023902.13	45.45008385028636	-0.0196417072682352	0.26548943668508407	-0.07398300856517176	0.9410239054053559	0.998665554108594	PLEKHO1	ENST00000369124.4	279	1230	2050	1508
ENSG00000143401.14	28.002505484122803	0.019113681124996475	0.3597778440826947	0.05312634293456717	0.9576312424596758	0.998665554108594	ANP32E	ENST00000583931.5	371	807	3451	1177
ENSG00000118298.11	0.09539285354611099	0.10883371621799316	4.080472856796901	0.02667183927880008	0.9787214741389535	NA	CA14	ENST00000369111.8	971	1014	2403	1984
ENSG00000117362.12	19.020309858592682	0.1478351940045585	0.41168270854287164	0.3590998381443152	0.7195204026852076	0.998665554108594	APH1A	ENST00000369109.7	190	798	1713	987
ENSG00000118292.8	0	NA	NA	NA	NA	NA	C1orf54	ENST00000369102.5	771	396	1251	1166
ENSG00000159208.15	1.843915235790731	-2.170268272238251	1.3745675863243854	-1.5788734536084774	0.11436508609997377	NA	CIART	ENST00000290363.5	450	1158	1746	1607
ENSG00000266472.5	25.576987945903028	0.20136270035177795	0.3598730677566678	0.5595381216132895	0.5757945217909384	0.998665554108594	MRPS21	ENST00000581066.2	448	264	1462	711
ENSG00000117360.12	35.02121657903723	-0.098806690952520565	0.32151966010481714	-0.3073115059909837	0.7586062786474819	0.998665554108594	PRPF3	ENST00000324862.6	166	2052	2433	2217
ENSG00000163125.15	80.19452138253318	-0.43015802317376284	0.2066063869954812	-2.082017063602061	0.03734091114013538	0.5667143023954003	RPRD2	ENST00000369068.4	5	4386	4612	4390
ENSG00000143374.16	22.965740897811166	-0.03559948629394531	0.3649422576823487	-0.09754827111562302	0.9222910021750039	0.998665554108594	TARS2	ENST00000369064.7	35	2157	2729	2191
ENSG00000143369.14	2.057021763414765	0.4659266952973404	1.2129284791898955	0.38413369237444966	0.7008793606795929	NA	ECM1	ENST00000369049.8	135	1704	1925	1838
ENSG00000143382.14	0.9628391908834906	0.519196257703332	1.792285618583747	0.2896838831489356	0.7720580872868268	NA	ADAMTSL4	ENST00000369039.9	290	3294	4319	3583
ENSG00000143384.12	97.38805423515524	-0.0025456239438004305	0.1951744793361037	-0.013042811501070757	0.9895936371209554	0.998665554108594	MCL1	ENST00000369026.2	61	1053	3932	1113
ENSG00000143420.18	53.3203243308277	0.038502975864004474	0.2588293553277894	0.14875814922632377	0.8817444751923984	0.998665554108594	ENSA	ENST00000339643.9	107	414	633	520
ENSG00000143457.10	7.453762008697172	-0.010139380994057886	0.630054549188818	-0.01609286212933805	0.9871603079746234	0.998665554108594	GOLPH3L	ENST00000271732.7	46	858	2999	903
ENSG00000143452.15	0.29388995663111156	-0.852941290235095	3.042030946726463	-0.2803854744321215	0.779181780019977	NA	HORMAD1	ENST00000361824.6	107	1185	1692	1291
ENSG00000163131.10	0.11472017899506465	0.10883371621799334	4.080472856796901	0.026671839278800125	0.9787214741389535	NA	CTSS	ENST00000368985.7	262	996	4107	1257
ENSG00000143387.12	1.7952740714956925	0.019320770535535447	1.2873963989183166	0.015007631333883607	0.9880260921447054	NA	CTSK	ENST00000271651.7	112	990	1692	1101
ENSG00000143437.20	24.897251323845822	0.1918174662826892	0.3654951290274454	0.5248153834309661	0.5997115364158361	0.998665554108594	ARNT	ENST00000358595.9	202	2370	4887	2571
ENSG00000283324.1	0	NA	NA	NA	NA	NA	NA	NA	NA	NA	NA	NA
ENSG00000143379.12	51.15416601413955	0.34541780934774863	0.2586541580241441	1.3354427084659724	0.1817314945152722	0.924890813222361	SETDB1	ENST00000271640.9	191	3876	4437	4066
ENSG00000143418.19	18.856885355873267	-0.4382204900251737	0.41626627327628735	-1.052740801160979	0.29245980332797833	0.9828392948364816	CERS2	ENST00000271688.10	427	1143	2544	1569
ENSG00000143412.9	0.09539285354611099	0.10883371621799316	4.080472856796901	0.02667183927880008	0.9787214741389535	NA	ANXA9	ENST00000368947.8	477	1038	1826	1514
ENSG00000143409.15	12.627113437931055	0.11910273058688474	0.5054490968822889	0.23563743870853504	0.8137140194717289	0.998665554108594	MINDY1	ENST00000361738.10	221	1554	1961	1774
ENSG00000143363.16	22.115533320888876	-0.3412963908245008	0.3749026515969661	-0.9103600344534419	0.3626326673283214	0.998665554108594	PRUNE1	ENST00000271620.7	157	1362	2997	1518
ENSG00000163141.19	0.09539285354611099	0.10883371621799316	4.080472856796901	0.02667183927880008	0.9787214741389535	NA	BNIPL	ENST00000368931.7	157	1074	2143	1230
ENSG00000143443.9	2.4446511222815492	-0.510086159212486	1.0916526923665526	-0.4672604783364657	0.6403135287451921	NA	C1orf56	ENST00000368926.5	109	1026	2096	1134
ENSG00000197622.12	16.178885223839124	-0.12148417070455146	0.429807393904207	-0.28264793120712844	0.7774467340383342	0.998665554108594	CDC42SE1	ENST00000439374.6	886	240	3498	1125
ENSG00000213190.3	773.6454542408103	-0.04221981122363528	0.1051493787408221	-0.40152221277218353	0.6880356874526734	0.998665554108594	MLLT11	ENST00000368921.4	2803	273	4075	3075
ENSG00000143458.11	0.961475111859676	1.6734964018004044	1.851107909143436	0.9040512406296087	0.3659682314754817	NA	GABPB2	ENST00000368918.7	332	1347	8964	1678
ENSG00000143434.15	47.367105356727734	0.20846550345795972	0.2980365994299216	0.699462763488472	0.4842628759522389	0.998665554108594	SEMA6C	ENST00000368913.7	130	2889	3817	3018
ENSG00000163154.5	0	NA	NA	NA	NA	NA	TNFAIP8L2	ENST00000368910.3	127	555	1178	681
ENSG00000163156.11	46.5805329630741	0.02716245363341042	0.27074650073548645	0.10032430173473436	0.9200868648257158	0.998665554108594	SCNM1	ENST00000368905.8	112	693	2016	804
ENSG00000163155.11	13.934530647012508	0.22565061929670396	0.475573462889582	0.4744810989361179	0.6351568732387987	0.998665554108594	LYSMD1	ENST00000368908.9	662	684	2479	1345
ENSG00000163157.14	0.33415354457040203	1.3662908437222665	3.077423035558894	0.44397238466570876	0.6570625496554132	NA	TMOD4	ENST00000295314.8	136	1038	1267	1173
ENSG00000163159.12	91.59507118343993	-0.09191272013745307	0.204526395315492	-0.4493929499694804	0.6531482161474897	0.998665554108594	VPS72	ENST00000354473.4	38	1128	1347	1165
ENSG00000143398.19	21.565176960242574	-0.027730800490160377	0.37574244560634434	-0.07380268270040809	0.9411673923630115	0.998665554108594	PIP5K1A	ENST00000368888.8	423	1689	2134	2111
ENSG00000159352.15	71.12944108868051	0.013377884754652415	0.22275538657782032	0.06005639172267023	0.9521107215994223	0.998665554108594	PSMD4	ENST00000368881.8	75	1143	1333	1217
ENSG00000143373.17	14.81236326117083	0.3964239677225606	0.46251001784182766	0.8571143379171787	0.3913816979496719	0.998665554108594	ZNF687	ENST00000324048.9	971	3714	5378	4684
ENSG00000143393.16	40.67475326345688	-0.0702456236994235	0.2850935351344303	-0.246395007400994	0.805376470649719	0.998665554108594	PI4KB	ENST00000368875.6	582	2487	3983	3068
ENSG00000143390.17	3.8799538174499304	1.3190259083519131	0.9629112815885255	1.3698311916918258	0.17073960283617798	NA	RFX5	ENST00000290524.8	180	1851	3576	2030
ENSG00000143416.20	0	NA	NA	NA	NA	NA	SELENBP1	ENST00000426705.6	146	1545	1928	1690
ENSG00000159377.10	114.31770442917409	-0.025337732738350716	0.17959182231086557	-0.14108511407881485	0.887802703264204	0.998665554108594	PSMB4	ENST00000290541.6	55	795	964	849
ENSG00000143442.21	102.5444311742593	-0.10161080967845891	0.18694016251304973	-0.5435472416012571	0.5867530735018025	0.998665554108594	POGZ	ENST00000271715.6	316	4233	6626	4548
ENSG00000143375.14	6.1377108410632895	-0.3284265422987486	0.7183561184691498	-0.4571918215141549	0.6475331762718111	0.998665554108594	CGN	ENST00000271636.11	134	3612	5091	3745
ENSG00000143367.15	23.954309239632305	-0.5370579640801575	0.3636321569637634	-1.476926486822441	0.13969534406448122	0.8806835854035382	TUFT1	ENST00000368849.7	63	1173	3111	1235
ENSG00000143376.13	53.80968938433699	-0.18207047589638728	0.25747542348974345	-0.7071373004407936	0.4794811579369459	0.998665554108594	SNX27	ENST00000458013.6	121	1626	6403	1746
ENSG00000159409.14	150.72392182854946	0.17951802090685492	0.16439387921262022	1.0919994209436092	0.27483335569896533	0.967710765571695	CELF3	ENST00000290583.8	795	1398	3246	2192
ENSG00000178796.12	1.9207231768177886	0.19590491442884664	1.2904421152475278	0.15181224489970158	0.8793350240476423	NA	RIIAD1	ENST00000479191.1	1	279	449	279
ENSG00000143436.10	37.736413184491326	0.13671187759094036	0.2940539246953639	0.46492111177421663	0.6419879512742757	0.998665554108594	MRPL9	ENST00000368830.7	86	804	1296	889
ENSG00000143450.16	0.8317129466999624	-0.3867180847112235	2.0260471335102164	-0.19087319259015326	0.8486249432328903	NA	OAZ3	ENST00000400999.6	68	708	890	775
ENSG00000182134.15	18.471686858611992	0.09813043183753829	0.408170488363377	0.24041530349488888	0.8100083155884403	0.998665554108594	TDRKH	ENST00000368822.5	635	1686	3093	2320
ENSG00000213171.2	0.5781106132595357	-2.9785862492489072	2.5506555638491277	-1.167772823373298	0.24289841307006277	NA	LINGO4	ENST00000368820.3	939	1782	3379	2720
ENSG00000143365.17	0.34416053698519394	1.51757704225613	3.0204281156028583	0.5024377287499959	0.615359645265595	NA	RORC	ENST00000318247.6	109	1557	2180	1665
ENSG00000225556.1	0.09539285354611099	0.10883371621799316	4.080472856796901	0.02667183927880008	0.9787214741389535	NA	C2CD4D	ENST00000454109.1	587	1062	1757	1648
ENSG00000196407.11	0	NA	NA	NA	NA	NA	THEM5	ENST00000368817.9	133	744	984	876
ENSG00000159445.12	3.4874438934524954	0.2921003058798254	0.9413646484794783	0.3102945350153471	0.7563369866337648	NA	THEM4	ENST00000368814.7	351	723	2377	1073
ENSG00000197747.8	24.672025342109695	-0.3749617957143628	0.35965421399134495	-1.0425619417972014	0.29715122342212297	0.9829531501243022	S100A10	ENST00000368811.7	661	294	1202	954
ENSG00000163191.5	0	NA	NA	NA	NA	NA	S100A11	ENST00000271638.2	121	318	594	438
ENSG00000182898.3	0	NA	NA	NA	NA	NA	TCHHL1	ENST00000368806.1	66	2715	3603	2780
ENSG00000159450.12	9.208353695458854	-2.092940522563527	0.6273337121456807	-3.3362474900400385	8.491753110092949e-4	0.046688818963070054	TCHH	ENST00000614923.1	96	5832	6995	5927
ENSG00000215853.3	0.11472017899506465	0.10883371621799334	4.080472856796901	0.026671839278800125	0.9787214741389535	NA	RPTN	ENST00000316073.3	66	2355	3569	2420
ENSG00000197915.5	0	NA	NA	NA	NA	NA	HRNR	ENST00000368801.2	77	8553	9623	8629
ENSG00000143631.10	0.4037754856248325	-0.852941821502808	2.7514621128141026	-0.3099958445840448	0.7565641163553191	NA	FLG	ENST00000368799.1	37	12186	12747	12222
ENSG00000143520.6	0.16707677228520101	0.10883426093833813	4.0208191991403215	0.027067683362039168	0.9784057502528954	NA	FLG2	ENST00000388718.5	74	7176	9124	7249
ENSG00000143536.7	0	NA	NA	NA	NA	NA	CRNN	ENST00000271835.3	64	1488	1902	1551
ENSG00000186207.4	0	NA	NA	NA	NA	NA	LCE5A	ENST00000334269.2	177	357	819	533
ENSG00000169509.5	0	NA	NA	NA	NA	NA	CRCT1	ENST00000368790.3	74	300	700	373
ENSG00000185966.3	0	NA	NA	NA	NA	NA	LCE3E	ENST00000368789.1	57	279	611	335
ENSG00000163202.4	0	NA	NA	NA	NA	NA	LCE3D	ENST00000368787.3	58	279	613	336
ENSG00000244057.4	0	NA	NA	NA	NA	NA	LCE3C	ENST00000333881.3	71	285	425	355
ENSG00000187238.5	0	NA	NA	NA	NA	NA	LCE3B	ENST00000335633.1	1	288	288	288
ENSG00000185962.1	0	NA	NA	NA	NA	NA	LCE3A	ENST00000335674.1	1	270	270	270
ENSG00000187223.3	0	NA	NA	NA	NA	NA	LCE2D	ENST00000368784.1	56	333	609	388
ENSG00000187180.3	0	NA	NA	NA	NA	NA	LCE2C	ENST00000368783.1	56	333	614	388
ENSG00000159455.8	0	NA	NA	NA	NA	NA	LCE2B	ENST00000368780.3	55	333	612	387
ENSG00000187173.3	0	NA	NA	NA	NA	NA	LCE2A	ENST00000368779.1	52	321	592	372
ENSG00000187170.4	0	NA	NA	NA	NA	NA	LCE4A	ENST00000368777.1	257	300	672	556
ENSG00000198854.5	0	NA	NA	NA	NA	NA	C1orf68	ENST00000368775.3	1	753	949	753
ENSG00000203786.6	0	NA	NA	NA	NA	NA	KPRP	ENST00000606109.1	29	1740	2492	1768
ENSG00000240386.3	0	NA	NA	NA	NA	NA	LCE1F	ENST00000334371.3	1	357	357	357
ENSG00000186226.8	0	NA	NA	NA	NA	NA	LCE1E	ENST00000368770.3	54	357	1180	410
ENSG00000172155.9	0	NA	NA	NA	NA	NA	LCE1D	ENST00000326233.6	44	345	430	388
ENSG00000197084.5	0	NA	NA	NA	NA	NA	LCE1C	ENST00000607093.1	1	357	644	357
ENSG00000196734.8	0	NA	NA	NA	NA	NA	LCE1B	ENST00000360090.3	477	357	1139	833
ENSG00000186844.5	0	NA	NA	NA	NA	NA	LCE1A	ENST00000335123.3	1	333	422	333
ENSG00000235942.2	0	NA	NA	NA	NA	NA	LCE6A	ENST00000431011.2	166	243	628	408
ENSG00000285946.1	0	NA	NA	NA	NA	NA	NA	NA	NA	NA	NA	NA
ENSG00000163206.5	0	NA	NA	NA	NA	NA	SMCP	ENST00000368765.3	151	351	775	501
ENSG00000163207.6	0.4902565325110029	-1.616400406782532	2.566321433410255	-0.6298511112984702	0.5287920016081442	NA	IVL	ENST00000368764.3	65	1758	2153	1822
ENSG00000283227.1	0	NA	NA	NA	NA	NA	NA	NA	NA	NA	NA	NA
ENSG00000184148.3	0	NA	NA	NA	NA	NA	SPRR4	ENST00000328051.2	50	240	733	289
ENSG00000169474.4	0	NA	NA	NA	NA	NA	SPRR1A	ENST00000368762.1	1	270	270	270
ENSG00000163209.14	0	NA	NA	NA	NA	NA	SPRR3	ENST00000331860.7	151	510	985	660
ENSG00000169469.8	0	NA	NA	NA	NA	NA	SPRR1B	ENST00000307098.4	66	270	620	335
ENSG00000163216.6	0	NA	NA	NA	NA	NA	SPRR2D	ENST00000368757.1	282	219	800	500
ENSG00000241794.1	0	NA	NA	NA	NA	NA	SPRR2A	ENST00000392653.2	87	219	709	305
ENSG00000196805.7	0	NA	NA	NA	NA	NA	SPRR2B	ENST00000368755.2	2	219	617	220
ENSG00000203785.8	0	NA	NA	NA	NA	NA	SPRR2E	ENST00000368751.1	76	219	692	294
ENSG00000244094.1	0	NA	NA	NA	NA	NA	SPRR2F	ENST00000468739.1	62	219	681	280
ENSG00000159516.8	0	NA	NA	NA	NA	NA	SPRR2G	ENST00000368748.4	40	222	568	261
ENSG00000203784.2	0	NA	NA	NA	NA	NA	LELP1	ENST00000368747.1	111	297	523	407
ENSG00000203783.4	0	NA	NA	NA	NA	NA	PRR9	ENST00000368744.3	57	351	1229	407
ENSG00000203782.5	1.1977638979648348	-3.0465790021341133	1.8676461171046832	-1.631239973264887	0.10283969377898775	NA	LOR	ENST00000368742.3	58	939	1230	996
ENSG00000159527.3	0	NA	NA	NA	NA	NA	PGLYRP3	ENST00000290722.1	54	1026	1173	1079
ENSG00000163218.14	0	NA	NA	NA	NA	NA	PGLYRP4	ENST00000359650.9	66	1122	1834	1187
ENSG00000163220.10	0	NA	NA	NA	NA	NA	S100A9	ENST00000368738.3	44	345	577	388
ENSG00000163221.8	0	NA	NA	NA	NA	NA	S100A12	ENST00000368737.4	119	279	518	397
ENSG00000143546.9	0	NA	NA	NA	NA	NA	S100A8	ENST00000368733.3	171	282	523	452
ENSG00000184330.11	0	NA	NA	NA	NA	NA	S100A7A	ENST00000368729.8	58	306	4279	363
ENSG00000197364.7	0	NA	NA	NA	NA	NA	NA	NA	NA	NA	NA	NA
ENSG00000143556.8	0	NA	NA	NA	NA	NA	S100A7	ENST00000368723.3	112	306	479	417
ENSG00000197956.9	0.5117143851650658	-1.6617004954484824	2.5337784282930174	-0.6558191816985175	0.5119404730246309	NA	S100A6	ENST00000496817.5	304	273	673	576
ENSG00000196420.7	0	NA	NA	NA	NA	NA	S100A5	ENST00000368718.5	283	279	710	561
ENSG00000196154.11	0.28316103030408013	-0.8529412171581342	3.0798551630514517	-0.27694198980222795	0.7818246498573196	NA	S100A4	ENST00000368716.8	149	306	600	454
ENSG00000188015.9	0	NA	NA	NA	NA	NA	S100A3	ENST00000368713.7	198	306	856	503
ENSG00000196754.10	0	NA	NA	NA	NA	NA	S100A2	ENST00000368708.7	374	294	998	667
ENSG00000188643.10	0	NA	NA	NA	NA	NA	S100A16	ENST00000368704.5	187	312	1146	498
ENSG00000189334.8	0	NA	NA	NA	NA	NA	S100A14	ENST00000368702.5	274	315	1218	588
ENSG00000189171.14	2.7655124020715034	0.684475620460134	1.065556788688747	0.6423642810276082	0.5206366860485436	NA	S100A13	ENST00000440685.6	297	297	686	593
ENSG00000160678.11	0.09539285354611099	0.10883371621799316	4.080472856796901	0.02667183927880008	0.9787214741389535	NA	S100A1	ENST00000292169.5	114	285	594	398
ENSG00000160679.12	60.73378804898345	0.19014302016971904	0.24938569811872927	0.7624455676652092	0.445794118603178	0.998665554108594	CHTOP	ENST00000368690.7	380	750	2165	1129
ENSG00000143553.10	18.363237728742757	-0.28554723151726014	0.4082632219735696	-0.6994194337097208	0.48428994632440225	0.998665554108594	SNAPIN	ENST00000368685.5	91	411	1030	501
ENSG00000143621.16	247.72731515071493	-0.25588731307775514	0.14943973399759192	-1.7123110850952032	0.08683935492334127	0.7683235614574633	ILF2	ENST00000361891.8	127	1173	1659	1299
ENSG00000169418.9	0.28316103030408013	-0.8529412171581342	3.0798551630514517	-0.27694198980222795	0.7818246498573196	NA	NPR1	ENST00000368680.3	473	3186	4236	3658
ENSG00000143624.13	52.93099293674348	0.013928967112776365	0.25311023284529305	0.055031228710891666	0.9561135845677833	0.998665554108594	INTS3	ENST00000318967.6	569	3129	5235	3697
ENSG00000143554.13	6.355270061630199	0.5719261451447649	0.7105980308778805	0.8048518575800176	0.42090517239203074	0.998665554108594	SLC27A3	ENST00000624995.3	66	2193	2413	2258
ENSG00000143614.9	74.3184147944273	-0.3488370277537594	0.2133404813631362	-1.6351187806686749	0.10202414986556636	0.7960116523064636	GATAD2B	ENST00000368655.4	245	1782	7478	2026
ENSG00000198837.9	34.802536691026624	-0.3366949757371042	0.30905294251936555	-1.089441093789316	0.2759594181024774	0.9684231118211333	DENND4B	ENST00000361217.8	420	4491	5706	4910
ENSG00000160741.16	20.6799771743125	0.12044174962152268	0.41419014092626866	0.29078854786879854	0.7712130445371859	0.998665554108594	CRTC2	ENST00000368633.1	129	2082	2644	2210
ENSG00000143570.17	6.418564915110634	0.7945935620767625	0.7146795934937453	1.1118178961740797	0.266216455607466	0.9618858344445017	SLC39A1	ENST00000368623.7	761	975	2723	1735
ENSG00000285779.1	0.28179695128026566	1.1586086705226502	3.0338809567996927	0.3818899577868788	0.7025429893180182	NA	NA	NA	NA	NA	NA	NA
ENSG00000143578.15	4.521269104414231	-0.1674979837944242	0.8026572102512771	-0.2086793486125763	0.8346985626347571	NA	CREB3L4	ENST00000368607.7	267	1188	1752	1454
ENSG00000143543.14	14.935846658882028	0.43105935024477127	0.4590599425894421	0.939004496478768	0.3477284357406228	0.9954514406987122	JTB	ENST00000271843.8	437	441	1287	877
ENSG00000285641.1	0	NA	NA	NA	NA	NA	NA	NA	NA	NA	NA	NA
ENSG00000143545.8	0	NA	NA	NA	NA	NA	RAB13	ENST00000368575.3	117	612	1176	728
ENSG00000177954.12	5.056705099802991	0.8748480748881893	0.8550571846040049	1.023145692054912	0.30623896588796473	NA	RPS27	ENST00000368567.5	43	255	359	297
ENSG00000143552.9	0.7334433471624165	1.225062247604306	2.0702887831142216	0.5917349587150408	0.5540280830845346	NA	NUP210L	ENST00000368559.7	73	5667	5889	5739
ENSG00000143549.19	49.668359966843965	0.18752351428180467	0.2583697726859815	0.7257950972063507	0.4679643929690414	0.998665554108594	TPM3	ENST00000368530.6	194	858	1523	1051
ENSG00000163263.6	0	NA	NA	NA	NA	NA	C1orf189	ENST00000368525.3	27	306	387	332
ENSG00000143612.20	23.325975094352103	-0.3862694602477542	0.37248585367381254	-1.037004375972925	0.29973381776782965	0.9858360509464498	C1orf43	ENST00000368521.9	200	762	1708	961
ENSG00000143569.18	229.977066328056	-0.43967486996370486	0.1490954374275787	-2.948949193547734	0.0031885639020851355	0.11350437912194092	UBAP2L	ENST00000428931.5	168	3264	3988	3431
ENSG00000143575.14	50.16120142427372	-0.18558741679193963	0.26273379292711	-0.7063705613363065	0.47995772319593877	0.998665554108594	HAX1	ENST00000328703.11	214	840	1227	1053
ENSG00000143595.12	0	NA	NA	NA	NA	NA	AQP10	ENST00000324978.7	41	906	1791	946
ENSG00000143515.16	30.58729165373131	0.4117919471924369	0.3224863032172844	1.2769284868355486	0.20162749587776418	0.929319751174869	ATP8B2	ENST00000368489.3	1	3672	5861	3672
ENSG00000160712.12	0	NA	NA	NA	NA	NA	IL6R	ENST00000368485.7	438	1407	5914	1844
ENSG00000169291.9	0	NA	NA	NA	NA	NA	SHE	ENST00000304760.2	88	1488	6243	1575
ENSG00000163239.12	0	NA	NA	NA	NA	NA	TDRD10	ENST00000368480.3	86	1101	1776	1186
ENSG00000160714.9	74.50145079746999	0.30891848816624573	0.2151380107962611	1.4359084525458226	0.1510283929851768	0.8958561707863174	UBE2Q1	ENST00000292211.4	81	1269	3210	1349
ENSG00000160716.5	29.817860982520852	0.6294088019711513	0.33195901911179027	1.896043685317651	0.05795426818009838	0.6896878403142388	CHRNB2	ENST00000368476.3	265	1509	5867	1773
ENSG00000160710.16	198.30994183674227	-0.19582225536236814	0.1467175356168444	-1.3346888259748422	0.18197821224118083	0.924890813222361	ADAR	ENST00000368474.9	181	3681	6610	3861
ENSG00000143603.18	2.673883297645971	0.47591933039592366	1.095804082915179	0.4343106015172261	0.6640629063527115	NA	KCNN3	ENST00000618040.4	315	2241	13057	2555
ENSG00000163344.5	23.525404830796656	-0.1546515292836228	0.366696916741573	-0.4217421042364868	0.6732132685166906	0.998665554108594	PMVK	ENST00000368467.3	307	579	1280	885
ENSG00000163346.16	0.42793746107512987	-0.001100763377750948	2.672633273193835	-4.118647286148316e-4	0.9996713795011898	NA	PBXIP1	ENST00000368463.7	73	2196	3212	2268
ENSG00000163348.3	43.06455411947668	0.0083045818187369	0.276815021148362	0.030000473905951692	0.976066675219652	0.998665554108594	PYGO2	ENST00000368457.2	173	1221	3146	1393
ENSG00000160691.18	17.100141226752356	0.00744825765873815	0.43876555039206805	0.01697548417846981	0.986456173745742	0.998665554108594	SHC1	ENST00000448116.6	222	1755	3481	1976
ENSG00000173207.12	0	NA	NA	NA	NA	NA	CKS1B	ENST00000308987.5	48	240	759	287
ENSG00000160688.18	27.440192395614392	-0.22150615576122185	0.3373656812310375	-0.6565758406514627	0.511453687475935	0.998665554108594	FLAD1	ENST00000292180.7	323	1764	2160	2086
ENSG00000163352.5	0	NA	NA	NA	NA	NA	LENEP	ENST00000392487.1	21	186	555	206
ENSG00000160685.13	0.7948754154691459	-1.4288915875447734	1.9596503700055001	-0.7291563890250294	0.46590600462929976	NA	ZBTB7B	ENST00000417934.6	459	1722	4017	2180
ENSG00000163354.14	0	NA	NA	NA	NA	NA	DCST2	ENST00000368424.3	60	2322	2392	2381
ENSG00000163357.10	0.3132172820800652	-0.8529414095629032	2.9792353811423258	-0.2862954081982809	0.7746518747375544	NA	DCST1	ENST00000295542.5	97	2121	2279	2217
ENSG00000143537.13	7.224366164976098	0.05739031943386497	0.6492950516094462	0.08838865981129561	0.9295677741786283	0.998665554108594	ADAM15	ENST00000356955.6	102	2592	2949	2693
ENSG00000243364.7	0.21011303254117564	0.8720993008102295	3.3658517487287454	0.25910211319901844	0.7955564543667359	NA	EFNA4	ENST00000427683.2	64	624	1052	687
ENSG00000251246.1	0	NA	NA	NA	NA	NA	NA	NA	NA	NA	NA	NA
ENSG00000143590.13	2.2425628932711703	-1.1396090647779062	1.1680179485122608	-0.9756776993277031	0.32922420677744274	NA	EFNA3	ENST00000368408.3	71	717	1782	787
ENSG00000169242.11	1.4775711063828092	0.5474554932177167	1.4359578204726604	0.3812476142492236	0.703019521152281	NA	EFNA1	ENST00000368407.7	519	618	1926	1136
ENSG00000169241.18	4.551084183474566	0.6149301036622548	0.8899557366531249	0.6909670653675825	0.4895862383685964	NA	SLC50A1	ENST00000368404.8	63	666	1300	728
ENSG00000179085.7	5.889485476428285	0.19606547096473056	0.769303198050944	0.2548611151773048	0.798830370283273	NA	DPM3	ENST00000368399.1	78	369	517	446
ENSG00000163463.11	31.41803984332044	0.3235816209713915	0.3188538385793108	1.0148274281819716	0.3101880967388794	0.9896696262630528	KRTCAP2	ENST00000295682.4	32	489	552	520
ENSG00000273088.1	0.09539285354611099	0.10883371621799316	4.080472856796901	0.02667183927880008	0.9787214741389535	NA	NA	NA	NA	NA	NA	NA
ENSG00000163462.17	53.338388117152206	0.05606785707368169	0.278635920436774	0.20122264561508393	0.8405244849912528	0.998665554108594	TRIM46	ENST00000334634.8	1	2280	3061	2280
ENSG00000185499.16	0.7427636801965782	1.1339468165268405	2.0115710327235914	0.5637120430152145	0.5729501200475144	NA	MUC1	ENST00000612778.4	73	1455	1836	1527
ENSG00000169231.13	10.837858074898953	1.5072149324956174	0.584631450001538	2.578059959811694	0.009935675594960102	0.2519534944382512	THBS3	ENST00000368378.7	22	2871	3145	2892
ENSG00000173171.14	4.4039170374453	0.6142024345371063	0.856518371706705	0.7170919560233623	0.4733173588037974	NA	MTX1	ENST00000368376.7	107	1401	1632	1507
ENSG00000177628.15	4.460558970019741	0.282151986331573	0.8259378224376496	0.34161407634637386	0.7326413424716218	NA	GBA	ENST00000327247.9	234	1611	2387	1844
ENSG00000160767.20	11.625136162300748	0.056682963155049	0.5137660846231776	0.11032834757207298	0.9121489763792598	0.998665554108594	FAM189B	ENST00000361361.6	511	2007	3082	2517
ENSG00000116521.10	50.70014190810125	0.29618708807684735	0.2569761573742894	1.1525858706239687	0.24908040539016726	0.9575436557009573	SCAMP3	ENST00000302631.7	109	1044	1446	1152
ENSG00000176444.18	23.043458725981203	-0.06803979103750707	0.3638098080859869	-0.187020221899641	0.8516447778896785	0.998665554108594	CLK2	ENST00000368361.8	317	1500	2166	1816
ENSG00000143630.9	33.292442491652515	-0.03406352306080536	0.31614862606766453	-0.10774528260488099	0.9141977482470912	0.998665554108594	HCN3	ENST00000368358.3	9	2325	3718	2333
ENSG00000143627.19	0.3978812092991448	-0.07338296444228708	2.5798921296203177	-0.0284441987320946	0.9773078729576111	NA	PKLR	ENST00000342741.6	44	1725	3047	1768
ENSG00000160752.14	150.36799373741803	-0.5237267663631192	0.16402883692959222	-3.1928944700615283	0.001408544123408319	0.0666761100556708	FDPS	ENST00000356657.10	163	1260	1478	1422
ENSG00000160753.15	213.11694124060543	-0.2567186173865996	0.1427658435007677	-1.7981795301424401	0.0721485623175993	0.7332480753563593	RUSC1	ENST00000368352.9	152	2709	3403	2860
ENSG00000116539.12	56.91730282725443	0.0044156236128505685	0.24668212656464233	0.017900054918220706	0.9857185852033329	0.998665554108594	ASH1L	ENST00000392403.7	480	8895	10979	9374
ENSG00000125459.15	3.468907301058923	0.1730111463292182	0.9709487056573476	0.17818773053730674	0.8585755451403237	NA	MSTO1	ENST00000245564.6	25	1713	2431	1737
ENSG00000163374.19	46.99275670318608	0.15614810364829942	0.2703766749343056	0.5775206152166761	0.5635878165050131	0.998665554108594	YY1AP1	ENST00000368339.9	193	2667	3073	2859
ENSG00000132676.15	32.77235985514745	-0.13225682595914837	0.30756864620529417	-0.43000750431131507	0.6671901823595494	0.998665554108594	DAP3	ENST00000368336.9	125	1197	2089	1321
ENSG00000116580.18	43.91667812375375	-0.09943013193973532	0.27665863823395237	-0.35939644818049626	0.7192985314268073	0.998665554108594	GON4L	ENST00000368331.5	176	6726	7823	6901
ENSG00000132718.8	157.05995235505085	0.09592660528562079	0.1989052506624885	0.48227286593048985	0.6296121201530075	0.998665554108594	SYT11	ENST00000368324.4	254	1296	5240	1549
ENSG00000143622.10	17.366688044518472	0.04056094392326654	0.42313206926960123	0.09585882722924242	0.9236326950481609	0.998665554108594	RIT1	ENST00000368322.7	31	711	855	741
ENSG00000132680.10	50.871803391423654	0.062306864717239493	0.2577440570859674	0.2417392874996834	0.8089821851990702	0.998665554108594	KHDC4	ENST00000368321.7	25	1845	2947	1869
ENSG00000173080.5	0.6633683654647096	2.4678978397651226	2.0982393403540534	1.176175564103518	0.23952472705088115	NA	RXFP4	ENST00000368318.4	1	1125	1240	1125
ENSG00000116584.17	45.70823666815818	-0.07282029865991306	0.27552932571274286	-0.26429237059082755	0.7915546387260065	0.998665554108594	ARHGEF2	ENST00000361247.8	101	2961	4149	3061
ENSG00000163479.13	54.90293797243516	0.4001296437712789	0.25796046260552735	1.5511277958248835	0.12087106121925557	0.8458906804787618	SSR2	ENST00000295702.8	73	552	1116	624
ENSG00000160803.7	24.527941505186654	-0.07671714121169577	0.37255883555097635	-0.20591953240952932	0.836853767747665	0.998665554108594	UBQLN4	ENST00000368309.3	94	1806	3576	1899
ENSG00000116586.11	21.21909307454206	0.501454666121106	0.38919663222030765	1.2884352653834217	0.19759448944775135	0.9291811678490309	LAMTOR2	ENST00000368305.8	139	378	655	516
ENSG00000132698.14	0.19849710308500057	-1.814722921847541	3.7520098932356833	-0.48366688081479126	0.628622301344521	NA	RAB25	ENST00000361084.9	242	642	1110	883
ENSG00000254726.2	123.42003232893803	0.10868611310500363	0.17536373544605216	0.6197753077542031	0.5354057274080675	0.998665554108594	MEX3A	ENST00000532414.2	1	1563	6124	1563
ENSG00000160789.19	15.812019504267475	0.2205377163894072	0.43962174893221984	0.5016533347703171	0.6159113953452076	0.998665554108594	LMNA	ENST00000368300.8	213	1995	3190	2207
ENSG00000196189.12	16.388185893069696	-0.48419326956927444	0.43661651421837455	-1.1089669167371536	0.2674444541899803	0.9623651660527258	SEMA4A	ENST00000368285.7	268	2286	3300	2553
ENSG00000160785.13	24.611027365357018	0.2415609118723104	0.35612635225982614	0.6783011432303949	0.4975807739694011	0.998665554108594	SLC25A44	ENST00000423538.6	330	969	3662	1298
ENSG00000260238.6	0	NA	NA	NA	NA	NA	PMF1-BGLAP	ENST00000368276.8	10	663	852	672
ENSG00000160783.19	6.217924609403852	-0.060239758981771196	0.7115307581537745	-0.08466219947831448	0.9325299484765885	0.998665554108594	PMF1	ENST00000368273.8	11	624	884	634
ENSG00000242252.1	0.11472017899506465	0.10883371621799334	4.080472856796901	0.026671839278800125	0.9787214741389535	NA	BGLAP	ENST00000368272.4	271	303	732	573
ENSG00000160781.16	0.9649697180885998	0.4521231041192026	1.8048064601094367	0.2505105750185466	0.8021925276882413	NA	PAQR6	ENST00000335852.6	682	1056	2277	1737
ENSG00000198952.8	37.2654656537851	-0.22471910734211895	0.30056878563566763	-0.7476461897627342	0.45467359624236015	0.998665554108594	SMG5	ENST00000361813.5	146	3051	4559	3196
ENSG00000163472.18	0.8704638676716324	1.5448135147109145	1.8835835158384941	0.8201460151466801	0.41213287290355366	NA	TMEM79	ENST00000405535.2	172	1185	2201	1356
ENSG00000198715.12	2.1961728111290904	0.5960270024275014	1.180332719865387	0.5049652461515057	0.6135832460351283	NA	GLMP	ENST00000362007.5	28	1221	1604	1248
ENSG00000189030.9	0.09539285354611099	0.10883371621799316	4.080472856796901	0.02667183927880008	0.9787214741389535	NA	NA	NA	NA	NA	NA	NA
ENSG00000163468.14	179.8102477413858	-0.0719486144928014	0.15531595926439273	-0.46324031885431705	0.6431921191369963	0.998665554108594	CCT3	ENST00000295688.7	282	1638	2150	1919
ENSG00000163467.11	0	NA	NA	NA	NA	NA	TSACC	ENST00000368255.7	361	378	751	738
ENSG00000132677.12	0	NA	NA	NA	NA	NA	RHBG	ENST00000537040.5	39	1377	1789	1415
ENSG00000125462.16	0.8795393426882254	-0.887180785366979	1.83523350557427	-0.4834157520949182	0.6288005658046669	NA	C1orf61	ENST00000368243.5	118	471	879	588
ENSG00000116604.17	40.37418977783393	-0.5364178605555395	0.28297688556915424	-1.895624299760869	0.05800974171635311	0.6896878403142388	MEF2D	ENST00000348159.8	482	1566	5965	2047
ENSG00000183856.10	0.9181939935861327	-0.7823918005713114	1.903346349269648	-0.4110611822548906	0.681027672627577	NA	IQGAP3	ENST00000361170.6	12	4896	5988	4907
ENSG00000187862.11	0.09539285354611099	0.10883371621799316	4.080472856796901	0.02667183927880008	0.9787214741389535	NA	TTC24	ENST00000368236.7	37	1749	2005	1785
ENSG00000163382.11	27.535699557979548	0.35739696508237784	0.35037249079617966	1.0200485896316687	0.3077054170081127	0.9896696262630528	NAXE	ENST00000368235.7	44	867	1125	910
ENSG00000160818.16	20.551739972846203	-0.354902533404056	0.3948390867866915	-0.898853597024423	0.3687306472423743	0.998665554108594	GPATCH4	ENST00000438976.6	32	1128	1159	1159
ENSG00000132702.12	1.7028987482838343	0.5757050133615739	1.3756702757146813	0.4184905522237053	0.6755884927444267	NA	HAPLN2	ENST00000255039.5	408	1023	1771	1430
ENSG00000132692.18	1.9639597808222766	0.8804303707116956	1.3910512077289094	0.632924486043274	0.5267829568632922	NA	BCAN	ENST00000329117.9	337	2736	3466	3072
ENSG00000132688.10	165.11401697208441	0.11132482123374571	0.1630666135000452	0.6826953650675701	0.4947993591182555	0.998665554108594	NES	ENST00000368223.3	134	4866	5558	4999
ENSG00000143320.8	102.53799702970291	-0.21636688564008846	0.18833396481889955	-1.1488468681055228	0.25061912957916155	0.9575436557009573	CRABP2	ENST00000621784.4	209	417	1033	625
ENSG00000143319.16	23.08054615238628	-0.44910783596378956	0.37583143424946147	-1.1949714553830806	0.23209818281545694	0.9451950096105671	ISG20L2	ENST00000313146.10	784	1062	3303	1845
ENSG00000143303.11	5.138444046183455	0.044730099241300995	0.7909578040088058	0.05655181479289509	0.9549022192986002	NA	RRNAD1	ENST00000368216.8	631	1428	2254	2058
ENSG00000143314.12	17.424705295396944	0.019582207021116238	0.4320607442951947	0.04532280999760808	0.9638500063685769	0.998665554108594	MRPL24	ENST00000361531.6	138	651	883	788
ENSG00000143321.18	89.90065758169254	0.5513714166321791	0.19738089681009055	2.7934386029397746	0.005215092788281839	0.15992035025729331	HDGF	ENST00000368206.5	86	771	960	856
ENSG00000143294.14	81.98035107819305	-0.03625230606068141	0.22661680573500204	-0.15997183414134616	0.8729032615483256	0.998665554108594	PRCC	ENST00000271526.8	273	1476	2105	1748
ENSG00000027869.11	0.3024883557530338	-0.852941344952721	3.013398577298713	-0.2830496275462237	0.7771387945328347	NA	SH2D2A	ENST00000392306.2	141	1200	1673	1340
ENSG00000198400.11	3.6701770764606074	-0.26842224352524297	0.9149481176072585	-0.2933742781254218	0.769236084001206	NA	NTRK1	ENST00000524377.5	42	2391	2432	2432
ENSG00000027644.4	0.7003695650521785	-0.26404585495358684	2.1105104331528004	-0.1251099500887755	0.9004365061604677	NA	INSRR	ENST00000368195.3	398	3894	5101	4291
ENSG00000187800.13	0	NA	NA	NA	NA	NA	PEAR1	ENST00000338302.7	226	3114	4970	3339
ENSG00000160838.13	1.3391419925807235	0.23987347617031102	1.4891026567354737	0.16108592318019246	0.872025727127157	NA	LRRC71	ENST00000337428.7	155	1680	1959	1834
ENSG00000132694.18	59.63462080545449	-0.05403417465065474	0.2443086812699364	-0.22117173393012768	0.8249587173286589	0.998665554108594	ARHGEF11	ENST00000368194.7	1041	4689	6889	5729
ENSG00000253831.1	0.453255332923534	1.9052298029442911	2.5277277138812937	0.7537322127227205	0.45101003511723936	NA	ETV3L	ENST00000454449.2	286	1086	1976	1371
ENSG00000117036.11	12.017841593507217	-0.2850805782874165	0.5063875351722971	-0.5629691856266141	0.5734558669715835	0.998665554108594	ETV3	ENST00000368192.8	66	1539	5254	1604
ENSG00000143297.18	0	NA	NA	NA	NA	NA	FCRL5	ENST00000361835.7	159	2934	5390	3092
ENSG00000163518.10	0	NA	NA	NA	NA	NA	FCRL4	ENST00000271532.1	137	1548	3459	1684
ENSG00000160856.20	0	NA	NA	NA	NA	NA	FCRL3	ENST00000368186.9	174	2229	2633	2402
ENSG00000132704.15	0.16707677228520101	0.10883426093833813	4.0208191991403215	0.027067683362039168	0.9784057502528954	NA	FCRL2	ENST00000361516.7	50	1527	2579	1576
ENSG00000163534.14	0.09539285354611099	0.10883371621799316	4.080472856796901	0.02667183927880008	0.9787214741389535	NA	FCRL1	ENST00000368176.7	69	1290	2596	1358
ENSG00000073754.5	0	NA	NA	NA	NA	NA	CD5L	ENST00000368174.4	98	1044	2191	1141
ENSG00000183853.17	46.56752787993059	0.392761244344195	0.2678825230854348	1.4661697217885807	0.14260205510865195	0.8876369259267097	KIRREL1	ENST00000359209.10	68	2274	2874	2341
ENSG00000158473.6	0	NA	NA	NA	NA	NA	CD1D	ENST00000368171.3	500	1008	2253	1507
ENSG00000158477.6	0	NA	NA	NA	NA	NA	CD1A	ENST00000289429.5	534	984	2096	1517
ENSG00000158481.12	0.5781106132595357	-2.9785862492489072	2.5506555638491277	-1.167772823373298	0.24289841307006277	NA	CD1C	ENST00000368170.7	280	1002	1435	1281
ENSG00000158485.10	0	NA	NA	NA	NA	NA	CD1B	ENST00000368168.3	109	1002	1395	1110
ENSG00000158488.15	0	NA	NA	NA	NA	NA	CD1E	ENST00000368167.7	240	1167	1458	1406
ENSG00000186306.1	0	NA	NA	NA	NA	NA	OR10T2	ENST00000334438.1	1	945	945	945
ENSG00000180708.5	0	NA	NA	NA	NA	NA	OR10K2	ENST00000641042.1	367	939	3023	1305
ENSG00000173285.4	0	NA	NA	NA	NA	NA	OR10K1	ENST00000641432.1	358	942	3775	1299
ENSG00000198965.4	0	NA	NA	NA	NA	NA	OR10R2	ENST00000368152.1	1	1008	1008	1008
ENSG00000197532.2	0	NA	NA	NA	NA	NA	OR6Y1	ENST00000641622.1	1573	978	5128	2550
ENSG00000186440.2	0	NA	NA	NA	NA	NA	OR6P1	ENST00000641540.1	257	954	3255	1210
ENSG00000279111.2	0.09539285354611099	0.10883371621799316	4.080472856796901	0.02667183927880008	0.9787214741389535	NA	NA	NA	NA	NA	NA	NA
ENSG00000198967.4	0	NA	NA	NA	NA	NA	OR10Z1	ENST00000641002.1	248	942	6323	1189
ENSG00000163554.13	0.37718980482637665	1.6099288391927182	2.5410755411531443	0.6335619752815888	0.5263667228897979	NA	SPTA1	ENST00000643759.1	199	7260	8016	7458
ENSG00000196171.3	0	NA	NA	NA	NA	NA	OR6K2	ENST00000359610.3	1	975	975	975
ENSG00000203757.2	0	NA	NA	NA	NA	NA	OR6K3	ENST00000368145.2	56	948	1844	1003
ENSG00000197403.4	0	NA	NA	NA	NA	NA	OR6N1	ENST00000641846.1	194	939	2640	1132
ENSG00000180433.5	0	NA	NA	NA	NA	NA	OR6K6	ENST00000368144.2	97	1032	1172	1128
ENSG00000188340.2	0	NA	NA	NA	NA	NA	OR6N2	ENST00000641131.1	42	954	3455	995
ENSG00000163563.7	0	NA	NA	NA	NA	NA	MNDA	ENST00000368141.4	262	1224	1752	1485
ENSG00000163564.14	0.1877681767579691	-1.8147221247558167	3.8342613253018007	-0.47329119504210554	0.6360054430717719	NA	PYHIN1	ENST00000368140.5	246	1479	2083	1724
ENSG00000163565.18	0.1877681767579691	-1.8147221247558167	3.8342613253018007	-0.47329119504210554	0.6360054430717719	NA	IFI16	ENST00000368131.8	291	2190	2734	2480
ENSG00000163568.14	0.3132172820800652	-0.8529414095629032	2.9792353811423258	-0.2862954081982809	0.7746518747375544	NA	AIM2	ENST00000368130.8	290	1032	1529	1321
ENSG00000162706.12	189.3015122551903	0.9553489457940247	0.1604703758292455	5.9534287301140205	2.625822321261458e-9	1.2707000733841647e-6	CADM3	ENST00000368124.8	158	1299	2546	1456
ENSG00000213088.10	3.9821313861300993	3.9968924701745983	1.3848262136222314	2.88620509263765	0.0038991797623978146	NA	ACKR1	ENST00000368121.4	176	1017	1242	1192
ENSG00000179639.10	0	NA	NA	NA	NA	NA	FCER1A	ENST00000368115.5	100	774	1165	873
ENSG00000196266.5	0.16707677228520101	0.10883426093833813	4.0208191991403215	0.027067683362039168	0.9784057502528954	NA	OR10J3	ENST00000332217.5	1	990	990	990
ENSG00000249730.1	0.09539285354611099	0.10883371621799316	4.080472856796901	0.02667183927880008	0.9787214741389535	NA	NA	NA	NA	NA	NA	NA
ENSG00000196184.9	0	NA	NA	NA	NA	NA	OR10J1	ENST00000641630.1	38	963	1089	1000
ENSG00000184155.8	0.16707677228520101	0.10883426093833813	4.0208191991403215	0.027067683362039168	0.9784057502528954	NA	OR10J5	ENST00000334857.3	1	930	930	930
ENSG00000132703.3	0	NA	NA	NA	NA	NA	APCS	ENST00000255040.2	98	672	926	769
ENSG00000132693.12	0	NA	NA	NA	NA	NA	CRP	ENST00000255030.9	105	675	2015	779
ENSG00000158716.8	2.189684709817308	-0.6485554938410264	1.1580302581381718	-0.5600505593728995	0.5754449520638649	NA	DUSP23	ENST00000368107.1	99	453	756	551
ENSG00000181036.13	0.28905530662976786	-1.8147273456729796	3.257988198284016	-0.5570085694689739	0.5775215742398907	NA	FCRL6	ENST00000368106.3	2	1305	1306	1306
ENSG00000158714.10	0.11472017899506465	0.10883371621799334	4.080472856796901	0.026671839278800125	0.9787214741389535	NA	SLAMF8	ENST00000289707.9	150	858	2996	1007
ENSG00000256029.6	0	NA	NA	NA	NA	NA	NA	NA	NA	NA	NA	NA
ENSG00000243284.1	0.16707677228520101	0.10883426093833813	4.0208191991403215	0.027067683362039168	0.9784057502528954	NA	VSIG8	ENST00000368100.1	137	1245	1818	1381
ENSG00000213085.9	0	NA	NA	NA	NA	NA	CFAP45	ENST00000368099.8	66	1656	1842	1721
ENSG00000158710.14	0.4709292070620492	-1.6151302740174056	2.5973481688658664	-0.6218381861075842	0.5340482742091054	NA	TAGLN2	ENST00000368096.5	248	663	1603	910
ENSG00000085552.16	18.283109120263926	0.25632113372217846	0.41769822266445106	0.6136514828507866	0.5394456553620698	0.998665554108594	IGSF9	ENST00000368094.5	199	3540	4044	3738
ENSG00000162723.9	0	NA	NA	NA	NA	NA	SLAMF9	ENST00000368093.3	118	870	1156	987
ENSG00000177807.9	0.16707677228520101	0.10883426093833813	4.0208191991403215	0.027067683362039168	0.9784057502528954	NA	KCNJ10	ENST00000368089.4	463	1140	5528	1602
ENSG00000143315.7	6.717618259316646	0.5099334120991885	0.7176482912512873	0.7105617310257532	0.47735586468960806	0.998665554108594	PIGM	ENST00000368090.4	253	1272	7039	1524
ENSG00000162728.4	2.6688037896270584	-0.50206719381981	1.145695098336435	-0.4382206003576506	0.6612263766431783	NA	KCNJ9	ENST00000368088.3	243	1182	4170	1424
ENSG00000162729.13	4.660604299502869	0.06410490103920242	0.8071519586424014	0.07942110571970167	0.9366976817281005	NA	IGSF8	ENST00000368086.5	218	1842	2366	2059
ENSG00000018625.14	0.6810422396032249	-0.3213970111049809	2.1273784020960815	-0.15107656014008233	0.8799153225515368	NA	ATP1A2	ENST00000361216.7	90	3063	5421	3152
ENSG00000132681.16	0.48755240971476843	-2.7967049491090434	2.538398490234476	-1.1017596172816457	0.2705661908762351	NA	ATP1A4	ENST00000368081.8	472	3090	3839	3561
ENSG00000143318.12	0.34416053698519394	1.51757704225613	3.0204281156028583	0.5024377287499959	0.615359645265595	NA	CASQ1	ENST00000368078.7	197	1191	1897	1387
ENSG00000162734.12	62.60215174086376	0.010728392672958624	0.23180667091637155	0.04628163905097057	0.9630857735407984	0.998665554108594	PEA15	ENST00000368076.1	349	456	2694	804
ENSG00000132716.18	0.19849710308500057	-1.814722921847541	3.7520098932356833	-0.48366688081479126	0.628622301344521	NA	DCAF8	ENST00000368073.7	436	1794	4106	2229
ENSG00000258465.7	0.3024883557530338	-0.852941344952721	3.013398577298713	-0.2830496275462237	0.7771387945328347	NA	NA	NA	NA	NA	NA	NA
ENSG00000162735.18	12.28795521704842	0.057945367129912294	0.49605596053666434	0.11681215777998792	0.9070089091975327	0.998665554108594	PEX19	ENST00000368072.9	23	900	3661	922
ENSG00000122218.15	201.92645952575486	-0.2329583294975803	0.14264140782302598	-1.6331746373858689	0.10243227256559903	0.7965823614011197	COPA	ENST00000368069.7	79	3702	4664	3780
ENSG00000162736.16	27.945252855737543	0.14964905333402698	0.34360797115008584	0.43552264760662723	0.6631831037598377	0.998665554108594	NCSTN	ENST00000294785.9	126	2130	2936	2255
ENSG00000171786.5	168.25554999708385	-0.16036860742340514	0.1587873906097506	-1.009958075433966	0.3125153766194018	0.9896696262630528	NHLH1	ENST00000302101.5	447	402	2563	848
ENSG00000162738.5	84.92460291134013	0.11266938705282561	0.20802534103775774	0.5416137596062179	0.5880846109591167	0.998665554108594	VANGL2	ENST00000368061.2	475	1566	5340	2040
ENSG00000162739.13	0.11472017899506465	0.10883371621799334	4.080472856796901	0.026671839278800125	0.9787214741389535	NA	SLAMF6	ENST00000368057.7	62	999	2712	1060
ENSG00000066294.14	0	NA	NA	NA	NA	NA	CD84	ENST00000311224.8	68	1038	1116	1105
ENSG00000117090.14	0	NA	NA	NA	NA	NA	SLAMF1	ENST00000538290.2	14	1074	1087	1087
ENSG00000117091.9	0	NA	NA	NA	NA	NA	CD48	ENST00000613788.1	69	759	1500	827
ENSG00000026751.16	0	NA	NA	NA	NA	NA	SLAMF7	ENST00000368043.7	38	1008	2689	1045
ENSG00000122224.17	0	NA	NA	NA	NA	NA	LY9	ENST00000263285.10	31	1968	2443	1998
ENSG00000122223.12	0.11472017899506465	0.10883371621799334	4.080472856796901	0.026671839278800125	0.9787214741389535	NA	CD244	ENST00000368033.7	84	1113	1360	1196
ENSG00000179914.4	0	NA	NA	NA	NA	NA	ITLN1	ENST00000326245.3	117	942	1183	1058
ENSG00000158764.6	0	NA	NA	NA	NA	NA	ITLN2	ENST00000368029.3	59	978	1151	1036
ENSG00000158769.17	5.79759447064675	-0.1655888520297147	0.7204322250412895	-0.2298465369455461	0.8182110213869817	NA	F11R	ENST00000368026.10	276	900	4835	1175
ENSG00000270149.5	0.29388995663111156	-0.852941290235095	3.042030946726463	-0.2803854744321215	0.779181780019977	NA	NA	NA	NA	NA	NA	NA
ENSG00000215845.10	15.030088787470504	0.39933334901480727	0.4787730093131709	0.8340765691609795	0.40423783770028787	0.998665554108594	TSTD1	ENST00000423014.2	102	348	593	449
ENSG00000158773.14	60.528670519702146	0.2609566001211125	0.25259199841608365	1.033115069984324	0.3015500517376225	0.9874633954101465	USF1	ENST00000368021.7	206	933	1807	1138
ENSG00000186517.13	0.357862479377423	1.5478705681019607	2.752388601283676	0.5623735570551539	0.5738615314344382	NA	ARHGAP30	ENST00000368013.7	322	3306	4394	3627
ENSG00000143217.8	0	NA	NA	NA	NA	NA	NECTIN4	ENST00000368012.3	304	1533	3502	1836
ENSG00000162755.13	7.977621155017792	-0.19023683588530552	0.6248690289444647	-0.3044427345145519	0.7607906144707997	0.998665554108594	KLHDC9	ENST00000368011.8	143	1050	1314	1192
ENSG00000143256.4	114.57840829850747	0.1305225243830936	0.17832922796687667	0.7319188552049202	0.4642180969292473	0.998665554108594	PFDN2	ENST00000368010.3	86	465	677	550
ENSG00000158793.13	16.24088308413599	-0.07400489959387695	0.4443393218469141	-0.1665504175643799	0.8677238096917418	0.998665554108594	NIT1	ENST00000368009.6	77	984	1362	1060
ENSG00000158796.16	30.916171628720516	0.45357019186185565	0.3287205728085632	1.379804701563358	0.1676467846529363	0.9160150852988098	DEDD	ENST00000368005.5	88	1047	1256	1134
ENSG00000143222.11	28.075410060166778	-0.015837007175264126	0.34504855245674254	-0.045897909330454456	0.9633916205354841	0.998665554108594	UFC1	ENST00000368003.5	247	504	1114	750
ENSG00000143258.15	9.077077738641092	0.8823445421252669	0.6118726837644054	1.4420394398011787	0.14929124773443053	0.8920364745442281	USP21	ENST00000368002.7	378	1698	2342	2075
ENSG00000143224.17	20.80292117027904	-0.1023943262156423	0.4023032638022691	-0.2545202473573986	0.7990936638804195	0.998665554108594	PPOX	ENST00000367999.8	267	1434	1740	1700
ENSG00000158850.14	15.202707982114063	0.42088977923089815	0.48672108651594215	0.8647453149065738	0.3871785917667371	0.998665554108594	B4GALT3	ENST00000622395.4	728	1182	2414	1909
ENSG00000158859.9	0.6810422396032249	-0.3213970111049809	2.1273784020960815	-0.15107656014008233	0.8799153225515368	NA	ADAMTS4	ENST00000367996.5	430	2514	9773	2943
ENSG00000158864.12	142.3389750913599	0.3088443862964432	0.17049958763909062	1.8114084061610605	0.07007765570079696	0.7263786982007666	NDUFS2	ENST00000367993.7	449	1392	2042	1840
ENSG00000158869.10	0.1877681767579691	-1.8147221247558167	3.8342613253018007	-0.47329119504210554	0.6360054430717719	NA	FCER1G	ENST00000289902.1	26	261	591	286
ENSG00000158874.11	0	NA	NA	NA	NA	NA	APOA2	ENST00000367990.7	59	303	474	361
ENSG00000158882.14	13.51039864760651	-0.37964723629405717	0.47115375365417084	-0.8057820474730211	0.420368531205859	0.998665554108594	TOMM40L	ENST00000367988.7	270	927	2708	1196
ENSG00000143257.11	0.4816581333890807	-1.643044415370397	2.4484221229944336	-0.6710625590006288	0.5021806773392499	NA	NR1I3	ENST00000367980.6	204	1074	1403	1277
ENSG00000248485.1	0	NA	NA	NA	NA	NA	PCP4L1	ENST00000504449.1	249	207	1424	455
ENSG00000158887.15	1.2209512426081297	-1.2829581584611254	1.5909366533409433	-0.8064168713235266	0.42000252216610245	NA	MPZ	ENST00000533357.4	68	747	1955	814
ENSG00000143252.14	24.81759203766277	0.20035970217389265	0.3643339133073644	0.5499342632011927	0.5823644624541542	0.998665554108594	SDHC	ENST00000367975.6	150	510	13566	659
ENSG00000188931.3	0.11472017899506465	0.10883371621799334	4.080472856796901	0.026671839278800125	0.9787214741389535	NA	CFAP126	ENST00000367974.1	7	534	774	540
ENSG00000143226.13	0.11472017899506465	0.10883371621799334	4.080472856796901	0.026671839278800125	0.9787214741389535	NA	FCGR2A	ENST00000271450.10	39	954	2412	992
ENSG00000173110.7	0	NA	NA	NA	NA	NA	HSPA6	ENST00000309758.5	120	1932	2371	2051
ENSG00000203747.10	0	NA	NA	NA	NA	NA	FCGR3A	ENST00000638849.1	1	873	873	873
ENSG00000244682.7	0.11472017899506465	0.10883371621799334	4.080472856796901	0.026671839278800125	0.9787214741389535	NA	NA	NA	NA	NA	NA	NA
ENSG00000162747.10	0.19849710308500057	-1.814722921847541	3.7520098932356833	-0.48366688081479126	0.628622301344521	NA	FCGR3B	ENST00000531221.6	255	810	1589	1064
ENSG00000072694.20	0	NA	NA	NA	NA	NA	FCGR2B	ENST00000358671.9	82	933	2115	1014
ENSG00000132185.16	0.11472017899506465	0.10883371621799334	4.080472856796901	0.026671839278800125	0.9787214741389535	NA	FCRLA	ENST00000367959.6	243	1149	2362	1391
ENSG00000162746.14	1.0762193261061352	-0.6044029031992765	1.6510653862166638	-0.3660684236038867	0.7143140189127082	NA	FCRLB	ENST00000367948.6	216	1281	1977	1496
ENSG00000081721.11	23.548410597406203	-0.0415048247226132	0.3776612650283223	-0.10989960730947769	0.9124889939798967	0.998665554108594	DUSP12	ENST00000367943.4	33	1023	1270	1055
ENSG00000118217.5	27.36367407649665	-0.19755640157220541	0.33955204495253183	-0.5818147895407996	0.5606914410552426	0.998665554108594	ATF6	ENST00000367942.3	68	2013	7496	2080
ENSG00000162745.10	3.803029006776942	1.8455555016605836	1.026553309851016	1.7978174966173257	0.07220593373076761	NA	OLFML2B	ENST00000367940.2	211	2256	2685	2466
ENSG00000198929.12	8.358020441153723	-0.10422593101319771	0.6199873356415169	-0.16810977421877893	0.8664969200703645	0.998665554108594	NOS1AP	ENST00000361897.9	403	1521	4931	1923
ENSG00000254706.2	0	NA	NA	NA	NA	NA	NA	NA	NA	NA	NA	NA
ENSG00000239887.4	0.6928307922546004	-1.9865379967436119	2.319686914410452	-0.8563819472372589	0.391786546901394	NA	C1orf226	ENST00000426197.2	74	948	1049	1021
ENSG00000171722.12	0	NA	NA	NA	NA	NA	SPATA46	ENST00000367935.9	81	786	1711	866
ENSG00000198574.5	0	NA	NA	NA	NA	NA	SH2D1B	ENST00000367929.2	111	399	2523	509
ENSG00000152332.15	7.435076828359794	-0.13020716566836762	0.6404061731889464	-0.20331966042736926	0.8388851896534872	0.998665554108594	UHMK1	ENST00000489294.1	159	1260	8478	1418
ENSG00000117143.13	11.306853533756996	-0.12556946705993158	0.5430572170063781	-0.2312269557011647	0.8171384897435894	0.998665554108594	UAP1	ENST00000271469.7	330	1569	2377	1898
ENSG00000162733.17	0.28316103030408013	-0.8529412171581342	3.0798551630514517	-0.27694198980222795	0.7818246498573196	NA	DDR2	ENST00000367922.7	439	2568	10160	3006
ENSG00000132196.14	2.553963055684145	-0.7924219857299557	1.1335778144697883	-0.6990450727024836	0.48452386332736613	NA	HSD17B7	ENST00000254521.7	56	1026	1190	1081
ENSG00000185860.13	0	NA	NA	NA	NA	NA	CCDC190	ENST00000367910.5	122	909	1498	1030
ENSG00000117152.13	1.3211787461555844	-0.5357113731714478	1.545947175389262	-0.3465263119592416	0.728947213598951	NA	RGS4	ENST00000421743.6	161	909	3311	1069
ENSG00000143248.12	0.8034738145910681	-1.3495628841695915	2.02824900451169	-0.6653832350799082	0.505805405085677	NA	RGS5	ENST00000530507.5	69	558	851	626
ENSG00000143228.12	0.09539285354611099	0.10883371621799316	4.080472856796901	0.02667183927880008	0.9787214741389535	NA	NUF2	ENST00000271452.7	280	1395	1969	1674
ENSG00000185630.18	405.19113797883335	-0.696897510337985	0.11518895593952239	-6.050037563530629	1.4481206455598437e-9	7.540449384997493e-7	PBX1	ENST00000420696.6	189	1293	6636	1481
ENSG00000162761.14	0	NA	NA	NA	NA	NA	LMX1A	ENST00000342310.7	384	1149	3545	1532
ENSG00000143171.12	20.17347119588193	-0.6614039305407671	0.4000643289740536	-1.6532439476343885	0.09828122559610637	0.7917053627791132	RXRG	ENST00000359842.9	304	1392	2041	1695
ENSG00000162763.3	0.19849710308500057	-1.814722921847541	3.7520098932356833	-0.48366688081479126	0.628622301344521	NA	LRRC52	ENST00000294818.1	291	942	1369	1232
ENSG00000143198.12	90.89050856016172	-0.40351476295073013	0.19258060519907064	-2.095303223985701	0.03614404606489189	0.5583718948803195	MGST3	ENST00000367889.7	441	459	1015	899
ENSG00000143149.12	10.09674656570707	0.10502046695601884	0.5474993624843841	0.19181842784157443	0.8478844356737876	0.998665554108594	ALDH9A1	ENST00000354775.4	306	1557	2696	1862
ENSG00000143183.16	38.410333891400725	0.6789210111086696	0.29767094393137233	2.2807768945873135	0.02256165229326032	0.4276568438970885	TMCO1	ENST00000612311.4	19	720	4468	738
ENSG00000143179.15	34.278615580304134	0.03453109301784003	0.30084569456158483	0.11478008042681599	0.9086194382088826	0.998665554108594	UCK2	ENST00000367879.8	304	786	1375	1089
ENSG00000188859.6	8.601878272707584	0.7543986410156905	0.6103169984360702	1.2360767321716875	0.21643004284785558	0.9405837954939663	FAM78B	ENST00000338353.3	591	786	1597	1376
ENSG00000143157.11	57.259424131980836	-1.1289851623657145e-4	0.2565528681511571	-4.400594585052674e-4	0.9996488833635558	0.9998243526148992	POGK	ENST00000367875.1	361	1830	6254	2190
ENSG00000152382.5	38.76237457911292	-0.4766031601954486	0.3016801444425504	-1.579829395388695	0.11414594183544881	0.8282130140388466	TADA1	ENST00000367874.4	95	1008	2159	1102
ENSG00000143195.12	0.5856493860571139	-0.838740721092115	2.2823967336828503	-0.3674824401534838	0.7132591877296737	NA	ILDR2	ENST00000271417.7	57	1920	13140	1976
ENSG00000143194.12	0.11472017899506465	0.10883371621799334	4.080472856796901	0.026671839278800125	0.9787214741389535	NA	MAEL	ENST00000367872.8	245	1305	1908	1549
ENSG00000143167.11	0	NA	NA	NA	NA	NA	GPA33	ENST00000367868.3	345	960	2802	1304
ENSG00000198842.9	0.38928281017722255	-0.15679597805167314	2.752923176026633	-0.056956176408083044	0.954580104597322	NA	DUSP27	ENST00000361200.6	167	3477	4164	3643
ENSG00000143190.22	40.989946167335816	-0.1779413353298887	0.28389985234393933	-0.6267750189398342	0.5308067208096465	0.998665554108594	POU2F1	ENST00000367866.6	70	2301	13905	2370
ENSG00000198821.10	0	NA	NA	NA	NA	NA	CD247	ENST00000362089.9	74	495	1609	568
ENSG00000143162.8	2.210082936147027	-0.23943654997887845	1.1710859603898949	-0.2044568529360234	0.8379965061328717	NA	CREG1	ENST00000370509.4	27	663	1974	689
ENSG00000198771.10	0	NA	NA	NA	NA	NA	RCSD1	ENST00000367854.7	332	1251	3135	1582
ENSG00000197965.11	17.3072048901069	0.2622270271193763	0.425145015002432	0.6167943122133897	0.5373704040723277	0.998665554108594	MPZL1	ENST00000359523.6	203	810	5010	1012
ENSG00000143199.17	0.1877681767579691	-1.8147221247558167	3.8342613253018007	-0.47329119504210554	0.6360054430717719	NA	ADCY10	ENST00000367851.8	186	4833	5051	5018
ENSG00000143158.10	12.606385322790219	-0.07448476697395395	0.4947164492246473	-0.15056052227632913	0.8803224049680354	0.998665554108594	MPC2	ENST00000367846.8	200	384	2177	583
ENSG00000143164.15	13.998865781003733	-0.14761625493438588	0.4798139440386983	-0.3076531158971074	0.7583462984621457	0.998665554108594	DCAF6	ENST00000367840.3	95	2856	3349	2950
ENSG00000143147.14	12.066195817058938	0.6760962715526112	0.5178444822965637	1.305597133243989	0.19168959575279806	0.9277918998086915	GPR161	ENST00000537209.5	619	1650	8256	2268
ENSG00000143155.12	49.718962676660944	-0.1772786987341246	0.25979596614728584	-0.6823766410353739	0.4950008222857117	0.998665554108594	TIPRL	ENST00000367833.6	146	819	3032	964
ENSG00000213064.9	2.119862425014364	-0.5029966059515258	1.2052574659038775	-0.4173353994321087	0.6764330992753953	NA	SFT2D2	ENST00000271375.6	73	483	11040	555
ENSG00000143178.12	0.4902565325110029	-1.616400406782532	2.566321433410255	-0.6298511112984702	0.5287920016081442	NA	TBX19	ENST00000367821.7	52	1347	2822	1398
ENSG00000143185.3	0	NA	NA	NA	NA	NA	XCL2	ENST00000367819.2	34	345	565	378
ENSG00000143184.4	0	NA	NA	NA	NA	NA	XCL1	ENST00000367818.3	166	345	1367	510
ENSG00000143196.4	0	NA	NA	NA	NA	NA	DPT	ENST00000367817.3	91	606	1786	696
ENSG00000143153.12	182.69008496529366	-0.17240325850619548	0.1508358737884949	-1.1429857776933279	0.25304449608511403	0.9575436557009573	ATP1B1	ENST00000367816.5	530	912	2608	1441
ENSG00000143156.13	15.70181828329407	0.10615688714356916	0.4434751073072971	0.2393750751606671	0.8108147554068659	0.998665554108594	NME7	ENST00000367811.7	258	1131	1642	1388
ENSG00000117475.13	8.957582504326584	0.5008149174062035	0.5893527771506297	0.84977103158403	0.3954523981508748	0.998665554108594	BLZF1	ENST00000367808.7	424	1203	2749	1626
ENSG00000117477.12	8.220158270579335	0.5652511852009566	0.6305641951525967	0.8964213153018714	0.3700277873130264	0.998665554108594	CCDC181	ENST00000367806.7	154	1530	1860	1683
ENSG00000117479.13	5.77961502784741	-0.37601146956330467	0.7558292164483122	-0.4974820520040302	0.6188491564712377	NA	SLC19A2	ENST00000236137.9	238	1494	3671	1731
ENSG00000198734.10	0.5326506476554026	0.34954373421144863	2.499366975606908	0.13985290580490717	0.8887762112201189	NA	F5	ENST00000367797.7	203	6675	7024	6877
ENSG00000174175.16	0.4902565325110029	-1.616400406782532	2.566321433410255	-0.6298511112984702	0.5287920016081442	NA	SELP	ENST00000263686.10	39	2493	3142	2531
ENSG00000000460.16	1.961897803137617	0.10418972676389725	1.2600656134423154	0.08268595353480532	0.9341012540781716	NA	C1orf112	ENST00000286031.10	701	2562	4355	3262
ENSG00000188404.8	0.2294403579901293	0.9544283611678432	3.5363014242657567	0.2698945159534899	0.7872414063075179	NA	SELL	ENST00000236147.4	162	1158	2436	1319
ENSG00000007908.15	0.11472017899506465	0.10883371621799334	4.080472856796901	0.026671839278800125	0.9787214741389535	NA	SELE	ENST00000333360.11	141	1833	3857	1973
ENSG00000171806.11	6.200378879467688	-0.30354437256297945	0.7111779651056466	-0.4268191471847521	0.6695110592620448	0.998665554108594	METTL18	ENST00000310392.4	355	1119	1521	1473
ENSG00000000457.13	11.132476524013756	-0.32084475751634556	0.5385433125570537	-0.5957640732607835	0.5513328475385182	0.998665554108594	SCYL3	ENST00000367772.8	223	2229	3090	2451
ENSG00000075945.12	174.5202512004222	-0.24981084527166317	0.15602833789558027	-1.6010607344855876	0.10936346790672005	0.8185011070293065	KIFAP3	ENST00000361580.6	229	2379	2957	2607
ENSG00000203740.3	0	NA	NA	NA	NA	NA	METTL11B	ENST00000439373.2	108	852	992	959
ENSG00000120370.12	6.2530922433273375	-0.5124678798787479	0.6954779742247091	-0.7368570952229313	0.46120925782035044	0.998665554108594	GORAB	ENST00000367763.7	21	1185	2189	1205
ENSG00000116132.11	0	NA	NA	NA	NA	NA	PRRX1	ENST00000239461.10	314	738	4284	1051
ENSG00000117501.14	0	NA	NA	NA	NA	NA	MROH9	ENST00000367759.8	155	2586	3165	2740
ENSG00000007933.12	0.11472017899506465	0.10883371621799334	4.080472856796901	0.026671839278800125	0.9787214741389535	NA	FMO3	ENST00000367755.8	112	1599	2087	1710
ENSG00000094963.13	0	NA	NA	NA	NA	NA	FMO2	ENST00000209929.9	159	1608	3851	1766
ENSG00000010932.16	0	NA	NA	NA	NA	NA	FMO1	ENST00000354841.4	132	1599	2160	1730
ENSG00000076258.9	0	NA	NA	NA	NA	NA	FMO4	ENST00000367749.3	331	1677	2252	2007
ENSG00000117523.16	225.78579495595702	-0.4501041075601044	0.14459328128359722	-3.112897802473237	0.0018526015727851834	0.08118430258561606	PRRC2C	ENST00000338920.8	238	8454	10355	8691
ENSG00000283683.1	0	NA	NA	NA	NA	NA	NA	NA	NA	NA	NA	NA
ENSG00000034971.16	0	NA	NA	NA	NA	NA	MYOC	ENST00000037502.10	73	1515	2095	1587
ENSG00000117533.14	8.28464110893295	0.40485993361625544	0.6206277064620177	0.6523394450502715	0.5141822191886997	0.998665554108594	VAMP4	ENST00000236192.11	388	426	5159	813
ENSG00000010165.19	18.15933378092554	-0.06295036629234088	0.4225969189407652	-0.14896077910393982	0.8815845813471977	0.998665554108594	METTL13	ENST00000361735.3	267	2100	3327	2366
ENSG00000197959.13	130.44743300036552	-0.6763732411771431	0.18025388659412678	-3.7523365179920702	1.7519407703549497e-4	0.014342107109707894	DNM3	ENST00000627582.2	158	2592	7625	2749
ENSG00000135845.9	11.513702656531592	0.19743393122645234	0.5135723021514723	0.38443259186555867	0.7006578481302034	0.998665554108594	PIGC	ENST00000367728.1	1465	894	2630	2358
ENSG00000180999.10	0.1877681767579691	-1.8147221247558167	3.8342613253018007	-0.47329119504210554	0.6360054430717719	NA	C1orf105	ENST00000367727.8	199	552	985	750
ENSG00000094975.13	22.899389063431244	0.5149268121435023	0.3799748482180001	1.3551602548389656	0.17536650461325598	0.9196103367818435	SUCO	ENST00000367723.8	125	4218	5916	4342
ENSG00000117560.7	0	NA	NA	NA	NA	NA	FASLG	ENST00000367721.2	185	846	1888	1030
ENSG00000120337.8	0	NA	NA	NA	NA	NA	TNFSF18	ENST00000404377.3	2	600	2008	601
ENSG00000117586.10	0	NA	NA	NA	NA	NA	TNFSF4	ENST00000281834.3	138	552	3470	689
ENSG00000117592.8	40.747440805348354	-0.2000511735594973	0.2773133097245959	-0.7213904509602197	0.4706693200632413	0.998665554108594	PRDX6	ENST00000340385.5	133	675	1751	807
ENSG00000162753.12	0.16707677228520101	0.10883426093833813	4.0208191991403215	0.027067683362039168	0.9784057502528954	NA	SLC9C2	ENST00000367714.3	424	3375	4428	3798
ENSG00000285777.1	0	NA	NA	NA	NA	NA	NA	NA	NA	NA	NA	NA
ENSG00000183831.6	0	NA	NA	NA	NA	NA	ANKRD45	ENST00000333279.2	62	801	1446	862
ENSG00000232113.2	0	NA	NA	NA	NA	NA	TEX50	ENST00000417563.2	190	534	821	723
ENSG00000076321.10	22.457577406945884	0.18447450151490366	0.37760521223135013	0.4885380167948538	0.6251688045974398	0.998665554108594	KLHL20	ENST00000209884.4	137	1830	3421	1966
ENSG00000120334.15	0.9619521877543469	-0.7554471788596109	1.7336976267126023	-0.43574333102830193	0.6630229635427195	NA	CENPL	ENST00000356198.6	287	1173	2357	1459
ENSG00000117593.10	10.5023151357476	0.23808789412813564	0.5439632612885691	0.4376911292945416	0.6616102007844424	0.998665554108594	DARS2	ENST00000361951.5	663	1938	3441	2600
ENSG00000185278.15	11.244718360072746	-0.08458529924715491	0.5342422252402856	-0.15832761854252733	0.8741986461629125	0.998665554108594	ZBTB37	ENST00000367701.9	192	1512	19128	1703
ENSG00000117601.13	0	NA	NA	NA	NA	NA	SERPINC1	ENST00000367698.3	120	1395	1594	1514
ENSG00000135870.11	26.453659564683214	-0.32727417998923164	0.3541478276071229	-0.9241174291553081	0.35542517975418125	0.9954514406987122	RC3H1	ENST00000367696.6	353	3402	11261	3754
ENSG00000152061.23	50.89705965101393	0.020624956305053562	0.26458384804276264	0.07795243911381965	0.9378658858981862	0.998665554108594	RABGAP1L	ENST00000251507.8	175	2448	2899	2622
ENSG00000203737.3	0.11472017899506465	0.10883371621799334	4.080472856796901	0.026671839278800125	0.9787214741389535	NA	GPR52	ENST00000367685.3	2	1086	1088	1087
ENSG00000116161.17	24.79275010850493	0.1365905187668547	0.3602647940976319	0.37913923593055454	0.7045844714288143	0.998665554108594	CACYBP	ENST00000367679.6	449	687	2766	1135
ENSG00000120333.4	32.64585103822271	0.19741976334098718	0.3169047200554053	0.6229625210582908	0.5333091510969861	0.998665554108594	MRPS14	ENST00000476371.1	18	387	2115	404
ENSG00000120332.15	0.6680622311232354	-0.6604210341525039	2.1126157938486516	-0.31260820641191167	0.7545783425946319	NA	TNN	ENST00000239462.8	114	3900	5008	4013
ENSG00000235750.9	0	NA	NA	NA	NA	NA	NA	NA	NA	NA	NA	NA
ENSG00000116147.16	6.346369650081186	-0.9687711324228964	0.730458360065695	-1.3262510026386287	0.18475657053750713	0.9251298653420428	TNR	ENST00000367674.6	710	4077	12949	4786
ENSG00000143207.20	23.3494670035203	0.4205980424219225	0.3677776466999262	1.143620462515747	0.25278107175004233	0.9575436557009573	COP1	ENST00000367669.7	516	2196	3033	2711
ENSG00000116183.10	2.118698689739063	0.45172560169791476	1.2358218307061293	0.3655264783919587	0.7147184452696727	NA	PAPPA2	ENST00000367662.4	1165	5376	9691	6540
ENSG00000152092.15	72.58419560268379	-0.177434731145319	0.24462392659511484	-0.7253367796642276	0.4682454472847501	0.998665554108594	ASTN1	ENST00000361833.6	15	3885	7116	3899
ENSG00000198797.6	8.286552093677631	1.8907256888254687	0.7042485240172841	2.6847421390961483	0.007258578358715495	0.20441705389781842	BRINP2	ENST00000361539.4	313	2352	3558	2664
ENSG00000120341.18	1.0549340966472727	-3.9431543133707523	3.4985610867835577	-1.1270788805908594	0.25970913174763155	NA	SEC16B	ENST00000308284.10	91	3183	3985	3273
ENSG00000075391.16	67.04263613596517	-0.15956429381517698	0.22325887922212992	-0.7147052532518519	0.474791191001015	0.998665554108594	RASAL2	ENST00000367649.7	353	3843	4378	4195
ENSG00000188585.9	0	NA	NA	NA	NA	NA	NA	NA	NA	NA	NA	NA
ENSG00000240021.9	0	NA	NA	NA	NA	NA	TEX35	ENST00000319416.6	113	702	1023	814
ENSG00000116191.17	15.164441092332842	0.16956490173939123	0.4855206112107966	0.3492434673710935	0.7269065359014603	0.998665554108594	RALGPS2	ENST00000367635.7	339	1752	5834	2090
ENSG00000116194.12	0	NA	NA	NA	NA	NA	ANGPTL1	ENST00000234816.6	449	1476	3348	1924
ENSG00000116199.11	11.853793590836485	-0.04905899584436433	0.5200766333148397	-0.09433032115223951	0.9248467644998909	0.998665554108594	FAM20B	ENST00000263733.4	337	1230	5984	1566
ENSG00000186283.13	6.168023475035955	0.4923550689023235	0.7079117565791511	0.6955034498671638	0.4867398499480185	0.998665554108594	TOR3A	ENST00000367627.7	753	1194	2724	1946
ENSG00000143322.19	27.402032417845607	-0.13996833099192008	0.34072715811951826	-0.4107929986104096	0.6812243274643617	0.998665554108594	ABL2	ENST00000502732.5	205	3549	12144	3753
ENSG00000057252.12	4.329082393283642	-1.2863308110299254	0.9227092399252175	-1.3940803401233721	0.16329334525361866	NA	SOAT1	ENST00000367619.7	144	1653	6835	1796
ENSG00000162779.21	0.5219217213283711	0.35159427991252473	2.5144536055859192	0.13982929696195212	0.8887948650638651	NA	AXDND1	ENST00000367618.7	388	3039	3642	3426
ENSG00000116218.12	0.1877681767579691	-1.8147221247558167	3.8342613253018007	-0.47329119504210554	0.6360054430717719	NA	NPHS2	ENST00000367615.8	70	1152	1855	1221
ENSG00000162782.15	0.16707677228520101	0.10883426093833813	4.0208191991403215	0.027067683362039168	0.9784057502528954	NA	TDRD5	ENST00000444136.5	519	3108	3946	3626
ENSG00000143340.6	40.53323008812544	-0.8723556681822429	0.28612426099995614	-3.0488699739529483	0.002297038776051688	0.0934851198069629	FAM163A	ENST00000341785.4	397	504	2909	900
ENSG00000169905.12	32.80497932482235	0.12934041799273954	0.3148939558326104	0.41074277736055886	0.6812611563237115	0.998665554108594	TOR1AIP2	ENST00000367612.7	389	1413	7905	1801
ENSG00000143337.18	14.665353501311987	-0.09338420456435648	0.48844412262206277	-0.1911870779876559	0.8483790271551608	0.998665554108594	TOR1AIP1	ENST00000528443.6	462	1755	3685	2216
ENSG00000135837.15	49.91454539901323	-0.14056671337400975	0.25707874386582047	-0.546784659284694	0.584526683624799	0.998665554108594	CEP350	ENST00000367607.7	419	9354	13491	9772
ENSG00000116260.16	33.46788200950331	-0.0208833787509741	0.30392711420959956	-0.06871179889719263	0.9452190262411945	0.998665554108594	QSOX1	ENST00000367602.7	75	2244	9311	2318
ENSG00000121454.5	31.50375328327069	-1.7578544713284907	0.3345662614588459	-5.254129521797941	1.4872619338116598e-7	3.87213018767671e-5	LHX4	ENST00000263726.3	245	1173	5820	1417
ENSG00000230124.7	49.066258663289034	-0.006738645576872825	0.26379109794538363	-0.025545386593250473	0.9796199470191871	0.998665554108594	ACBD6	ENST00000642319.1	689	849	5109	1537
ENSG00000143324.13	158.64946715817632	-0.1450473090171999	0.1723292701810316	-0.8416870150081175	0.3999631684257367	0.998665554108594	XPR1	ENST00000367590.8	199	2091	8474	2289
ENSG00000135835.11	1.7889267545267284	0.10919649225699485	1.292239726789943	0.08450172982086707	0.9326575275640925	NA	KIAA1614	ENST00000367588.8	56	3573	9654	3628
ENSG00000135823.13	26.483200369903223	-0.24584330257702394	0.34589313785272097	-0.7107492912498958	0.4772396088811858	0.998665554108594	STX6	ENST00000258301.5	239	768	4851	1006
ENSG00000153029.14	0.28905530662976786	-1.8147273456729796	3.257988198284016	-0.5570085694689739	0.5775215742398907	NA	MR1	ENST00000614012.4	162	1026	7860	1187
ENSG00000162783.10	9.619381013137946	-0.027306179535765786	0.5701193116809985	-0.047895552696247796	0.9617994837592492	0.998665554108594	IER5	ENST00000367577.6	192	984	4188	1175
ENSG00000198216.11	26.39202807148559	-0.4044152400876981	0.3754984605121776	-1.0770090496138869	0.28147622279612095	0.9735446501664947	CACNA1E	ENST00000367573.6	1	6942	7067	6942
ENSG00000179930.5	0	NA	NA	NA	NA	NA	ZNF648	ENST00000339948.3	209	1707	3649	1915
ENSG00000135821.18	79.5994798042265	-0.1895562366034233	0.209361914060386	-0.9053998070955246	0.3652536179112496	0.998665554108594	GLUL	ENST00000311223.9	898	1122	4719	2019
ENSG00000203730.2	0	NA	NA	NA	NA	NA	TEDDM1	ENST00000367565.1	132	822	2500	953
ENSG00000121446.19	0.5426131258011393	-1.6194721479106653	2.4961345460997593	-0.6487920094055468	0.5164728229890228	NA	RGSL1	ENST00000294854.12	21	3231	3696	3251
ENSG00000135828.11	0.71109849137921	-0.28303328997748095	2.0167172449285933	-0.1403435661043809	0.8883885441465058	NA	RNASEL	ENST00000367559.7	255	2226	4238	2480
ENSG00000143333.6	9.103584634774805	-0.9775037834910876	0.5783349704090649	-1.6902034867434779	0.0909890315565468	0.777669579732407	RGS16	ENST00000367558.5	150	609	2427	758
ENSG00000135824.12	19.68421601059532	0.19540086219353933	0.3989675387160358	0.48976631738607546	0.6242992678999983	0.998665554108594	RGS8	ENST00000258302.8	91	597	5606	687
ENSG00000135838.13	0.5770509869351916	-0.9275483327824783	2.292792561516891	-0.4045496083469586	0.6858086057865246	NA	NPL	ENST00000258317.6	23	963	2461	985
ENSG00000135829.16	181.58981462549903	-0.5933524972571146	0.15138302587661032	-3.919544439154928	8.871650260647468e-5	0.008536070446440369	DHX9	ENST00000367549.3	111	3813	4240	3923
ENSG00000157060.15	0.4561320789149689	-0.8529419800075534	2.6586262881131475	-0.3208205620402913	0.7483463761593356	NA	SHCBP1L	ENST00000367547.7	238	1962	2317	2199
ENSG00000135862.5	7.048401621282351	-0.4732083146007991	0.6557911916828085	-0.7215838221103759	0.47055038850313397	0.998665554108594	LAMC1	ENST00000258341.4	258	4830	7889	5087
ENSG00000058085.14	0.35484494904317015	-0.8529416149564758	2.8679296843393365	-0.29740673894972486	0.7661559993872986	NA	LAMC2	ENST00000264144.4	66	3582	5147	3647
ENSG00000157064.10	254.13089167505277	0.036511305450473444	0.13305730184081704	0.2744028696309632	0.7837750379733729	0.998665554108594	NMNAT2	ENST00000287713.6	336	924	5663	1259
ENSG00000116698.21	85.93779337920543	-0.21487506835852468	0.20783970449556785	-1.0338499512402206	0.3012063155287354	0.9874633954101465	SMG7	ENST00000507469.5	119	3537	4642	3655
ENSG00000116701.14	0.3055058860872866	1.3791407427759181	2.9037968746661345	0.4749439448771655	0.6348269279301986	NA	NCF2	ENST00000367535.7	253	1581	2226	1833
ENSG00000162704.15	92.21167465744776	-0.1653196558353457	0.19282222497049123	-0.857368261675466	0.39124139396590446	0.998665554108594	ARPC5	ENST00000294742.6	99	465	1637	563
ENSG00000143344.15	25.685000445849674	0.5500095758120098	0.3517490202097994	1.5636420976637222	0.11790164269682732	0.8362703054105092	RGL1	ENST00000304685.8	450	2412	5100	2861
ENSG00000173627.7	0	NA	NA	NA	NA	NA	APOBEC4	ENST00000308641.5	273	1104	2650	1376
ENSG00000198756.11	8.956601636119853	-0.9264740662322897	0.5817444750496688	-1.5925790548387904	0.1112546553461797	0.8248125704559319	COLGALT2	ENST00000361927.8	373	1881	5177	2253
ENSG00000198860.12	14.093190615452288	-0.24381810021660336	0.4767342589646828	-0.5114339815772833	0.6090472052046882	0.998665554108594	TSEN15	ENST00000645668.1	106	516	1986	621
ENSG00000116667.13	18.595158611589575	0.5618447940291896	0.4297397379980324	1.3074071219165728	0.1910744798529007	0.9262052806430554	C1orf21	ENST00000235307.6	436	366	10265	801
ENSG00000116406.18	19.743833841018166	0.08228891931471427	0.41956653896082613	0.19612841271500295	0.8445096579819971	0.998665554108594	EDEM3	ENST00000318130.12	268	2799	6898	3066
ENSG00000135842.16	0.6694263101470498	-2.2016943960928197	2.183710424443286	-1.008235511196096	0.3133414137923366	NA	FAM129A	ENST00000367511.3	195	2787	6928	2981
ENSG00000121481.10	58.23113360499872	0.11097581791358947	0.24956936215402806	0.44466923726437996	0.6565588037181131	0.998665554108594	RNF2	ENST00000367510.7	289	1011	3606	1299
ENSG00000121486.11	14.75218082527161	0.5446456331227189	0.5075095734231087	1.0731731215415912	0.2831934479885161	0.9754339140136881	TRMT1L	ENST00000367506.9	270	2202	4392	2471
ENSG00000116668.12	9.98648023089244	0.5114311552920893	0.558255207818804	0.9161242889078203	0.3596017097039664	0.9979138338193877	SWT1	ENST00000367500.8	166	2703	3830	2868
ENSG00000116679.15	42.93046905605939	-0.02010082798300589	0.28185359597847826	-0.07131655678624284	0.9431458183709346	0.998665554108594	IVNS1ABP	ENST00000367498.7	624	1929	4199	2552
ENSG00000143341.11	1.2136928872586275	0.0045736065095877375	1.5580807402838974	0.0029354104645144268	0.9976578846742705	NA	HMCN1	ENST00000271588.8	230	16908	18208	17137
ENSG00000116690.12	0	NA	NA	NA	NA	NA	PRG4	ENST00000445192.6	46	4215	5044	4260
ENSG00000047410.13	93.9980016882437	-0.17872628472719906	0.19966078947229912	-0.8951496445524948	0.3707070987460036	0.998665554108594	TPR	ENST00000367478.8	298	7092	9708	7389
ENSG00000157181.15	6.600776507955021	0.6427620447884278	0.688942190670954	0.9329694907528427	0.3508357209952749	0.9954514406987122	ODR4	ENST00000287859.10	126	1365	3792	1490
ENSG00000262180.1	0	NA	NA	NA	NA	NA	OCLM	ENST00000574641.1	475	135	884	609
ENSG00000116703.13	0	NA	NA	NA	NA	NA	PDC	ENST00000391997.2	89	741	1242	829
ENSG00000073756.11	0.28905530662976786	-1.8147273456729796	3.257988198284016	-0.5570085694689739	0.5775215742398907	NA	PTGS2	ENST00000367468.9	138	1815	4514	1952
ENSG00000116711.9	0.11472017899506465	0.10883371621799334	4.080472856796901	0.026671839278800125	0.9787214741389535	NA	PLA2G4A	ENST00000367466.3	153	2250	2875	2402
ENSG00000162670.10	2.686906419534764	-0.6852711304064344	1.0432823325294012	-0.6568414982596501	0.5112828378481771	NA	BRINP3	ENST00000367462.4	486	2301	3142	2786
ENSG00000150681.9	0	NA	NA	NA	NA	NA	RGS18	ENST00000367460.3	182	708	2150	889
ENSG00000253148.1	0	NA	NA	NA	NA	NA	RGS21	ENST00000417209.2	175	459	1794	633
ENSG00000090104.11	0	NA	NA	NA	NA	NA	RGS1	ENST00000367459.7	67	630	1405	696
ENSG00000127074.14	0.19849710308500057	-1.814722921847541	3.7520098932356833	-0.48366688081479126	0.628622301344521	NA	RGS13	ENST00000543215.5	256	480	1518	735
ENSG00000231767.4	0	NA	NA	NA	NA	NA	NA	NA	NA	NA	NA	NA
ENSG00000116741.7	13.899440285068081	-0.11022549385152117	0.47204964205060135	-0.23350403015389967	0.8153700404343698	0.998665554108594	RGS2	ENST00000235382.6	32	636	1354	667
ENSG00000116750.13	27.98212975225529	0.0059019710631388524	0.34888745669103094	0.016916547012366633	0.9865031920490787	0.998665554108594	UCHL5	ENST00000367455.8	237	990	5327	1226
ENSG00000116747.12	46.01257164025447	-0.08344167903290425	0.2689346841531928	-0.3102674513540005	0.7563575806826232	0.998665554108594	TROVE2	ENST00000367446.7	211	1617	3081	1827
ENSG00000023572.9	4.163989175466481	-0.08614218655740166	0.9171652999173363	-0.09392220417100998	0.9251709554245323	NA	GLRX2	ENST00000367440.3	477	498	1131	974
ENSG00000134371.12	18.472506548736547	-0.1407856199252825	0.41922807342156204	-0.3358210693674445	0.7370058008958082	0.998665554108594	CDC73	ENST00000367435.4	244	1596	5942	1839
ENSG00000162630.5	3.1057238913242453	-0.22314703428164923	0.9810382848739327	-0.22746006727996806	0.82006601713284	NA	B3GALT2	ENST00000367434.4	757	1269	3274	2025
ENSG00000162687.17	17.809926029328416	-0.19399913617737485	0.42160714735585825	-0.46014195298646005	0.6454143327303792	0.998665554108594	KCNT2	ENST00000294725.13	917	3408	4409	4324
ENSG00000000971.15	0.16707677228520101	0.10883426093833813	4.0208191991403215	0.027067683362039168	0.9784057502528954	NA	CFH	ENST00000367429.8	241	3696	4127	3936
ENSG00000116785.13	0	NA	NA	NA	NA	NA	CFHR3	ENST00000367425.8	93	993	1645	1085
ENSG00000244414.6	0	NA	NA	NA	NA	NA	CFHR1	ENST00000320493.9	89	993	1271	1081
ENSG00000134365.13	0	NA	NA	NA	NA	NA	CFHR4	ENST00000367416.6	138	1734	2178	1871
ENSG00000080910.12	0.11472017899506465	0.10883371621799334	4.080472856796901	0.026671839278800125	0.9787214741389535	NA	CFHR2	ENST00000367415.7	114	813	1072	926
ENSG00000134389.9	0.19849710308500057	-1.814722921847541	3.7520098932356833	-0.48366688081479126	0.628622301344521	NA	CFHR5	ENST00000256785.4	110	1710	2810	1819
ENSG00000143278.4	0.28179695128026566	1.1586086705226502	3.0338809567996927	0.3818899577868788	0.7025429893180182	NA	F13B	ENST00000367412.1	45	1986	2217	2030
ENSG00000066279.17	0.5426131258011393	-1.6194721479106653	2.4961345460997593	-0.6487920094055468	0.5164728229890228	NA	ASPM	ENST00000367409.8	258	10434	10887	10691
ENSG00000177888.7	19.48138168335312	-0.33423648578950466	0.4043944459475958	-0.8265110689300053	0.40851424167261624	0.998665554108594	ZBTB41	ENST00000367405.4	70	2730	8478	2799
ENSG00000134376.15	0.7500220355460805	-0.8905217341826486	2.0525941901189957	-0.43385182442274284	0.6643960453624979	NA	CRB1	ENST00000367400.7	136	4221	4932	4356
ENSG00000213047.12	10.403511056283168	-0.26725572643557194	0.5499253945586309	-0.4859854247139667	0.6269774999636963	0.998665554108594	DENND1B	ENST00000620048.5	339	2328	8378	2666
ENSG00000203724.10	1.1702481006284318	0.6151427754526222	1.6365940874451532	0.3758676511002838	0.7070152907386901	NA	C1orf53	ENST00000367393.7	4	438	588	441
ENSG00000143355.15	57.36497065826285	-1.127825742427772	0.25054675044319086	-4.501458272489134	6.748881588644915e-6	0.0010480894705734174	LHX9	ENST00000367387.5	426	1194	7836	1619
ENSG00000151414.14	1.9844508415465312	-0.21295220254238728	1.2164963217871656	-0.17505371675069045	0.8610374253080237	NA	NEK7	ENST00000367385.8	343	909	4149	1251
ENSG00000151418.11	0	NA	NA	NA	NA	NA	ATP6V1G3	ENST00000489986.1	25	375	449	399
ENSG00000081237.19	0.48029405436526623	0.1657985836510866	2.445605222100186	0.06779450017231545	0.9459492219180279	NA	PTPRC	ENST00000442510.7	175	3921	5390	4095
ENSG00000116833.13	1.435898925150649	-0.27041698225994015	1.4321671385687393	-0.18881663667425436	0.850236532202324	NA	NR5A2	ENST00000367362.7	247	1626	5086	1872
ENSG00000162702.7	57.50167796212557	-0.3758407707667971	0.23959607492596371	-1.5686432713179197	0.11673108380153646	0.8339028797662309	ZNF281	ENST00000294740.3	126	2688	4891	2813
ENSG00000118193.11	1.1988957591115472	0.5515661756588022	1.6703642982857605	0.33020711483408516	0.7412434712189107	NA	KIF14	ENST00000367350.4	440	4947	7274	5386
ENSG00000118197.13	9.2613852181177	0.28285914756308994	0.5979619762981168	0.47303868602853966	0.6361855792409248	0.998665554108594	DDX59	ENST00000331314.10	215	1860	2289	2074
ENSG00000118200.14	152.06643787784225	-0.1780671249024503	0.16751754740362032	-1.0629759548318338	0.2877928557876396	0.9783188784301787	CAMSAP2	ENST00000236925.8	50	4470	7161	4519
ENSG00000170128.4	0	NA	NA	NA	NA	NA	GPR25	ENST00000304244.4	84	1086	1224	1169
ENSG00000163362.10	0.6662451114561445	0.6375077283606507	2.103084777446411	0.3031298287150933	0.7617909228963031	NA	INAVA	ENST00000413687.2	362	1737	2197	2098
ENSG00000116852.14	333.6474113887286	-0.1693350414760254	0.1418791880564153	-1.193515721338163	0.23266745880600706	0.9451950096105671	KIF21B	ENST00000422435.2	318	4914	5519	5231
ENSG00000081248.10	0.7441277592203926	-0.2216044132103428	1.9938608081758855	-0.1111433718450392	0.91150265601531	NA	CACNA1S	ENST00000362061.3	228	5622	6166	5849
ENSG00000232237.3	0.7096898980863403	-0.45068640202305005	2.2632842307889924	-0.19912938723826942	0.8421615338381796	NA	ASCL5	ENST00000449188.2	607	621	2026	1227
ENSG00000116857.16	25.719961150906066	0.0056909940109884155	0.34649244091861586	0.016424583450942054	0.9868956676354678	0.998665554108594	TMEM9	ENST00000367332.5	94	561	1544	654
ENSG00000163395.16	2.34160262629193	1.399451409984063	1.319131537681813	1.0608884482008525	0.28874059967379484	NA	IGFN1	ENST00000335211.8	131	11127	11810	11257
ENSG00000081277.12	0	NA	NA	NA	NA	NA	PKP1	ENST00000263946.7	252	2244	5447	2495
ENSG00000118194.18	0	NA	NA	NA	NA	NA	TNNT2	ENST00000236918.11	1	897	1098	897
ENSG00000159166.13	0.3862652798429697	-2.5953146676540833	2.730997371526532	-0.9503175267442286	0.3419509358614453	NA	LAD1	ENST00000391967.6	303	1554	2906	1856
ENSG00000159173.18	0.11472017899506465	0.10883371621799334	4.080472856796901	0.026671839278800125	0.9787214741389535	NA	TNNI1	ENST00000361379.8	94	564	5413	657
ENSG00000174307.6	5.108258534243765	0.047173389567806485	0.7808294050445204	0.06041446347056668	0.9518255395152484	NA	PHLDA3	ENST00000367311.4	399	384	2640	782
ENSG00000159176.13	7.448493396209962	-0.20320141723482757	0.6414865447350248	-0.3167664527067561	0.7514208211647391	0.998665554108594	CSRP1	ENST00000367306.5	365	582	2129	946
ENSG00000134369.15	389.34740529082217	-0.17698034589220202	0.11977287146296055	-1.4776329875912906	0.13950603986327612	0.8806835854035382	NAV1	ENST00000367296.8	421	5634	13091	6054
ENSG00000198700.9	103.92217573224784	-0.020210745701347343	0.18244390220663134	-0.11077786353449712	0.9117924996332093	0.998665554108594	IPO9	ENST00000361565.8	70	3126	11435	3195
ENSG00000198892.6	2.3715586102495894	-0.6359128172151193	1.12549171165726	-0.565008885119867	0.5720677207508144	NA	SHISA4	ENST00000362011.6	288	594	1341	881
ENSG00000163431.12	0.09539285354611099	0.10883371621799316	4.080472856796901	0.02667183927880008	0.9787214741389535	NA	LMOD1	ENST00000367288.4	248	1803	3970	2050
ENSG00000134375.10	51.58649280389205	-0.11294641178407772	0.2497479318049392	-0.4522416300619952	0.6510949207262331	0.998665554108594	TIMM17A	ENST00000367287.4	37	516	1659	552
ENSG00000176393.10	18.07555193501782	0.06753927212418509	0.4178089602010111	0.16165108592140157	0.8715806255744448	0.998665554108594	RNPEP	ENST00000295640.8	44	1953	2427	1996
ENSG00000163435.15	0.3755363535159382	-2.565469269151976	2.9484801556472364	-0.8700988759372594	0.3842463719330909	NA	ELF3	ENST00000359651.7	3193	1116	4994	4308
ENSG00000170075.8	0.09539285354611099	0.10883371621799316	4.080472856796901	0.02667183927880008	0.9787214741389535	NA	GPR37L1	ENST00000367282.5	107	1446	6588	1552
ENSG00000143862.7	169.2395364165645	0.11026385136566708	0.15073137789025134	0.7315255317705052	0.4644582153501008	0.998665554108594	ARL8A	ENST00000272217.6	170	561	1793	730
ENSG00000143851.15	0	NA	NA	NA	NA	NA	PTPN7	ENST00000309017.7	775	1398	3765	2172
ENSG00000133067.17	0.5219217213283711	0.35159427991252473	2.5144536055859192	0.13982929696195212	0.8887948650638651	NA	LGR6	ENST00000367278.7	90	2904	3567	2993
ENSG00000077152.10	19.317050241522168	0.1179719587981419	0.4139716758420404	0.2849759190847554	0.7756625910917553	0.998665554108594	UBE2T	ENST00000367274.9	137	594	908	730
ENSG00000077157.21	22.056548872627193	0.04600003142768196	0.38114555126166266	0.12068888453613928	0.9039374634911688	0.998665554108594	PPP1R12B	ENST00000391959.5	154	3132	15431	3285
ENSG00000143858.11	11.879011194866564	-0.3152801036254519	0.5018199529474583	-0.6282733513756127	0.5298248857324986	0.998665554108594	SYT2	ENST00000367267.5	194	1260	7614	1453
ENSG00000117139.17	201.7407703426999	-0.09042729930107564	0.1465842025931015	-0.6168966212006484	0.5373029155864812	0.998665554108594	KDM5B	ENST00000367264.7	177	4743	6520	4919
ENSG00000183155.4	15.337486218696938	-0.0658773418711663	0.46832137385961553	-0.14066695553151018	0.8881330511412258	0.998665554108594	RABIF	ENST00000367262.3	38	372	2430	409
ENSG00000117153.15	17.934676317132045	-0.1064466828587368	0.42561000063258	-0.2501038102970469	0.8025070694118998	0.998665554108594	KLHL12	ENST00000367261.7	220	1707	3359	1926
ENSG00000159346.12	15.636105712242514	0.9336871343107689	0.46637064759888786	2.002028084567206	0.045281711097628276	0.6176174216274353	ADIPOR1	ENST00000340990.9	300	1128	2177	1427
ENSG00000159348.12	17.090867727705124	0.12376638312013469	0.43437654845134327	0.28492878715803505	0.7756987007491193	0.998665554108594	CYB5R1	ENST00000367249.8	76	918	1651	993
ENSG00000163444.11	2.588228293622997	0.11549623757361842	1.144247352834189	0.10093642540447702	0.9196009274623137	NA	TMEM183A	ENST00000367242.3	81	1131	3019	1211
ENSG00000143847.15	5.84807323362654	-0.24962364763991154	0.7094121002404337	-0.3518739637444994	0.7249327859707866	NA	NA	NA	NA	NA	NA	NA
ENSG00000122180.4	0	NA	NA	NA	NA	NA	MYOG	ENST00000241651.4	76	675	1528	750
ENSG00000163485.16	2.554256233827194	-1.730370056805783	1.1993707953281505	-1.4427315251847115	0.14909611499081069	NA	ADORA1	ENST00000367236.8	922	981	3407	1902
ENSG00000133055.8	0	NA	NA	NA	NA	NA	MYBPH	ENST00000255416.8	59	1434	1805	1492
ENSG00000133048.12	0	NA	NA	NA	NA	NA	CHI3L1	ENST00000255409.7	127	1152	1792	1278
ENSG00000133063.15	0.16707677228520101	0.10883426093833813	4.0208191991403215	0.027067683362039168	0.9784057502528954	NA	CHIT1	ENST00000367229.5	36	1401	2246	1436
ENSG00000159388.5	9.393268036786354	0.8199504143719014	0.5943181966132629	1.3796488464334582	0.16769479000874932	0.9160150852988098	BTG2	ENST00000290551.4	72	477	2712	548
ENSG00000122176.11	0	NA	NA	NA	NA	NA	FMOD	ENST00000354955.4	465	1131	3310	1595
ENSG00000188783.5	0	NA	NA	NA	NA	NA	PRELP	ENST00000343110.2	128	1149	5747	1276
ENSG00000188770.9	0	NA	NA	NA	NA	NA	OPTC	ENST00000367222.6	117	999	1359	1115
ENSG00000058668.14	4.587580336991359	-0.28822014047381755	0.7995400173549183	-0.3604824451780701	0.718486382169435	NA	ATP2B4	ENST00000357681.9	1124	3618	8968	4741
ENSG00000122188.12	0.1877681767579691	-1.8147221247558167	3.8342613253018007	-0.47329119504210554	0.6360054430717719	NA	LAX1	ENST00000442561.6	391	1197	3023	1587
ENSG00000058673.16	0	NA	NA	NA	NA	NA	ZC3H11A	ENST00000639812.1	6793	2433	11825	9225
ENSG00000257315.2	6.5609581217818125	0.9883555161799343	0.7310729599109703	1.3519245962814652	0.17639943824635226	0.9196103367818435	ZBED6	ENST00000550078.2	1810	2940	12481	4749
ENSG00000182004.12	5.495779978303167	0.8270803773162771	0.7920503876751638	1.0442269711450225	0.2963803912376693	NA	SNRPE	ENST00000414487.6	46	279	942	324
ENSG00000143842.14	7.98556261351419	0.4468830489115298	0.6309025354453615	0.7083234315995732	0.4787444292849857	0.998665554108594	SOX13	ENST00000367204.5	110	1869	3587	1978
ENSG00000143845.14	10.938532252621771	-0.8804232874268072	0.5501861225362923	-1.6002280889386322	0.10954799300049596	0.8185011070293065	ETNK2	ENST00000367201.7	43	1185	2431	1227
ENSG00000143839.14	0.21011303254117564	0.8720993008102295	3.3658517487287454	0.25910211319901844	0.7955564543667359	NA	REN	ENST00000272190.8	30	1221	1447	1250
ENSG00000170498.8	0	NA	NA	NA	NA	NA	KISS1	ENST00000367194.4	150	417	709	566
ENSG00000174567.7	0.6801552364740813	-2.219399622550887	2.174683578880681	-1.0205620919311955	0.3074619572508146	NA	GOLT1A	ENST00000308302.3	187	399	883	585
ENSG00000143850.14	166.0512842706794	-0.18648993904362085	0.15646226537006785	-1.191916393403425	0.233294029542162	0.9451950096105671	PLEKHA6	ENST00000272203.7	318	3147	7401	3464
ENSG00000158615.8	33.229227042636715	0.11423014374958987	0.3165289566687469	0.36088370856108976	0.7181863827535042	0.998665554108594	PPP1R15B	ENST00000367188.4	381	2142	5227	2522
ENSG00000133056.13	101.5138879610303	-0.2755372479835623	0.19440242768545143	-1.4173549747505687	0.15637916967702167	0.9041596407452619	PIK3C2B	ENST00000367187.7	558	4905	7686	5462
ENSG00000198625.12	22.150337625671398	0.41630534909634404	0.3846125591816398	1.082401859112814	0.27907400256481174	0.9699517908441929	MDM4	ENST00000367182.7	163	1473	10073	1635
ENSG00000170382.11	6.389465469742857	-1.286136417262011	0.7106674471542525	-1.8097584494859398	0.07033325399282357	0.7264395287734201	LRRN2	ENST00000367175.1	2214	2142	5036	4355
ENSG00000163531.15	170.65951219848213	0.33419786943136015	0.1765655159135783	1.8927697614234964	0.05838849451140916	0.6908590075636436	NFASC	ENST00000339876.10	329	3723	10333	4051
ENSG00000184144.11	6.846094099434235	1.1011808389596094	0.71563728747622	1.5387415639605009	0.12386740094427542	0.849764770972774	CNTN2	ENST00000331830.6	358	3123	7999	3480
ENSG00000174529.7	0.16707677228520101	0.10883426093833813	4.0208191991403215	0.027067683362039168	0.9784057502528954	NA	TMEM81	ENST00000367167.4	141	768	1332	908
ENSG00000117222.13	41.226608067486325	0.10816965996823887	0.29409607349075056	0.36780382235072867	0.7130195186905114	0.998665554108594	RBBP5	ENST00000264515.10	143	1617	4404	1759
ENSG00000133059.16	21.252285846395502	-0.18254041956870093	0.3797109660806633	-0.4807351798470926	0.6307047246063395	0.998665554108594	DSTYK	ENST00000367162.7	32	2790	7874	2821
ENSG00000133069.16	8.40280782365415	0.9573147635935205	0.6298964287365447	1.5197970966651075	0.12856197904994202	0.8556684371359611	TMCC2	ENST00000358024.7	390	2130	3738	2519
ENSG00000163545.8	2.573245866864043	-1.3095991667128295	1.1027018803635578	-1.1876275809750667	0.23498016659745274	NA	NUAK2	ENST00000367157.4	32	2019	3441	2050
ENSG00000162873.14	27.03249681932628	-0.5047669053589062	0.3497750922332766	-1.443118496906179	0.14898709361410425	0.8920364745442281	KLHDC8A	ENST00000367156.7	818	1053	3177	1870
ENSG00000186007.9	5.783452163027917	0.8207070385356159	0.7706367797213959	1.0649725786930668	0.2868883388660498	NA	LEMD1	ENST00000367153.8	104	546	929	649
ENSG00000117266.15	1.7192085433985351	-0.1335282770898445	1.377465817092764	-0.09693763390199045	0.9227759219963753	NA	CDK18	ENST00000506784.5	221	1515	2143	1735
ENSG00000174514.12	4.0420777897821125	-1.3861488624489338	0.8849765283707708	-1.5663114421812	0.11727572358114277	NA	MFSD4A	ENST00000367147.8	94	1545	4095	1638
ENSG00000158711.13	3.4607541389792886	0.8854869996258714	0.9834001957486354	0.9004340282358544	0.36788931878444187	NA	ELK4	ENST00000357992.8	341	1296	10239	1636
ENSG00000158715.5	0.7204188244133717	-0.49716213270268383	2.152418331895264	-0.23097839547989668	0.8173315861495366	NA	SLC45A3	ENST00000367145.3	297	1662	3341	1958
ENSG00000069275.12	210.2525018878403	0.15915829190433317	0.1423030039101688	1.1184464665609206	0.26337635818510197	0.9618858344445017	NUCKS1	ENST00000367142.4	304	732	6496	1035
ENSG00000117280.12	0.6694263101470498	-2.2016943960928197	2.183710424443286	-1.008235511196096	0.3133414137923366	NA	RAB29	ENST00000367139.7	305	612	3272	916
ENSG00000133065.10	2.2840179370390747	-0.09076942767841428	1.1562432221745844	-0.07850374898431946	0.9374273481701776	NA	SLC41A1	ENST00000367137.3	1016	1542	4997	2557
ENSG00000162877.12	0.3655738753702016	-0.8529416629417818	2.841297460916889	-0.3001944269033123	0.7640288558442491	NA	PM20D1	ENST00000367136.4	46	1509	2152	1554
ENSG00000174502.18	0.28905530662976786	-1.8147273456729796	3.257988198284016	-0.5570085694689739	0.5775215742398907	NA	SLC26A9	ENST00000367134.2	115	2664	4616	2778
ENSG00000276600.4	0	NA	NA	NA	NA	NA	RAB7B	ENST00000617991.4	305	600	3014	904
ENSG00000196188.10	0.3132172820800652	-0.8529414095629032	2.9792353811423258	-0.2862954081982809	0.7746518747375544	NA	CTSE	ENST00000358184.6	119	1191	2228	1309
ENSG00000263961.7	0.33415354457040203	1.3662908437222665	3.077423035558894	0.44397238466570876	0.6570625496554132	NA	RHEX	ENST00000331555.9	640	519	1665	1158
ENSG00000198049.6	0	NA	NA	NA	NA	NA	AVPR1B	ENST00000367126.4	466	1275	2237	1740
ENSG00000196550.10	0	NA	NA	NA	NA	NA	FAM72A	ENST00000367128.7	849	450	2398	1298
ENSG00000266028.7	13.729809378790703	0.18433936106949306	0.4726814145809766	0.38998648007539394	0.6965465443352199	0.998665554108594	SRGAP2	ENST00000573034.7	63	3216	6301	3278
ENSG00000263528.7	0.643900255672938	-1.7969254820591885	2.2719461952198508	-0.7909190304946039	0.4289912424385716	NA	IKBKE	ENST00000581977.6	327	2151	3221	2477
ENSG00000266094.7	17.039494492896196	-0.3196833875929881	0.42370381923170525	-0.7544972999598266	0.4505506660446268	0.998665554108594	RASSF5	ENST00000579436.6	74	1257	2064	1330
ENSG00000143486.15	8.656144820059346	0.3351941097415675	0.5983017285801508	0.5602425895325883	0.5753139806617019	0.998665554108594	EIF2D	ENST00000271764.6	118	1755	2005	1872
ENSG00000143479.16	10.98807306018642	-0.475666636163269	0.524336006242376	-0.9071790426373858	0.36431212441223276	0.998665554108594	DYRK3	ENST00000367109.6	169	1767	2163	1935
ENSG00000162889.10	27.802234539123905	0.36924233894896274	0.3413737456003414	1.0816366041846937	0.27941403290870753	0.9699517908441929	MAPKAPK2	ENST00000367103.3	194	1203	2961	1396
ENSG00000136634.6	0.28905530662976786	-1.8147273456729796	3.257988198284016	-0.5570085694689739	0.5775215742398907	NA	IL10	ENST00000423557.1	60	537	1630	596
ENSG00000142224.15	0	NA	NA	NA	NA	NA	IL19	ENST00000340758.6	26	648	1032	673
ENSG00000162891.10	0	NA	NA	NA	NA	NA	IL20	ENST00000367098.5	364	531	1553	894
ENSG00000162892.15	0	NA	NA	NA	NA	NA	IL24	ENST00000391929.7	276	624	1320	899
ENSG00000162894.11	0.35484494904317015	-0.8529416149564758	2.8679296843393365	-0.29740673894972486	0.7661559993872986	NA	FCMR	ENST00000367091.7	145	1173	1950	1317
ENSG00000162896.5	0.1877681767579691	-1.8147221247558167	3.8342613253018007	-0.47329119504210554	0.6360054430717719	NA	PIGR	ENST00000356495.4	185	2295	4279	2479
ENSG00000162897.14	0	NA	NA	NA	NA	NA	FCAMR	ENST00000324852.8	476	1734	2605	2209
ENSG00000182795.12	0.6138885181660081	0.5124414865181482	2.234973928055059	0.2292829818216672	0.8186489797298457	NA	C1orf116	ENST00000359470.5	251	1806	5493	2056
ENSG00000123836.14	8.009644515264926	0.33761036062757555	0.616758728715322	0.5473945400510201	0.5841077055485833	0.998665554108594	PFKFB2	ENST00000367080.7	125	1518	7094	1642
ENSG00000180667.10	7.990365509941452	-0.1700070887868306	0.6341562237489933	-0.26808392383470714	0.7886347199835588	0.998665554108594	YOD1	ENST00000315927.8	48	1047	6265	1094
ENSG00000123843.12	0	NA	NA	NA	NA	NA	C4BPB	ENST00000243611.9	295	759	1117	1053
ENSG00000123838.10	0	NA	NA	NA	NA	NA	C4BPA	ENST00000367070.7	195	1794	2243	1988
ENSG00000196352.15	5.788040768497926	0.07704067725997618	0.7935472363664837	0.09708392106906225	0.9226597496667808	NA	CD55	ENST00000367063.6	235	1335	1691	1569
ENSG00000117322.17	0.262469625831312	1.0699329647788878	3.110838632493142	0.3439371472384614	0.7308935546966044	NA	CR2	ENST00000367057.7	190	3279	4240	3468
ENSG00000203710.11	0.28179695128026566	1.1586086705226502	3.0338809567996927	0.3818899577868788	0.7025429893180182	NA	CR1	ENST00000367049.8	1	7470	7470	7470
ENSG00000197721.16	0.11472017899506465	0.10883371621799334	4.080472856796901	0.026671839278800125	0.9787214741389535	NA	CR1L	ENST00000508064.6	61	1710	1788	1770
ENSG00000117335.19	24.448740978426798	0.24533979195453345	0.3695370502705307	0.6639112147886798	0.5067471380096169	0.998665554108594	CD46	ENST00000322875.8	157	1200	3278	1356
ENSG00000174059.16	0	NA	NA	NA	NA	NA	CD34	ENST00000310833.11	323	1158	8246	1480
ENSG00000076356.6	21.92160578039268	-0.5097062543608889	0.3829229623727357	-1.3310934690428484	0.18315825766441243	0.924890813222361	PLXNA2	ENST00000367033.3	759	5685	11444	6443
ENSG00000008118.9	5.78073536481501	-0.30448715449521924	0.7308443292380961	-0.41662381756816336	0.6769535853335107	NA	CAMK1G	ENST00000009105.5	246	1431	2612	1676
ENSG00000196878.14	0.5563595824624236	0.5841612750600196	2.2947645194031963	0.2545626229274032	0.7990609308395069	NA	LAMB3	ENST00000391911.5	391	3519	4305	3909
ENSG00000123689.5	0.8454148890921914	-0.36918358649804756	1.9245105976338297	-0.19183245182019565	0.8478734501457807	NA	G0S2	ENST00000367029.4	163	312	866	474
ENSG00000117594.9	0	NA	NA	NA	NA	NA	HSD11B1	ENST00000367028.6	155	879	1461	1033
ENSG00000009790.14	0.16707677228520101	0.10883426093833813	4.0208191991403215	0.027067683362039168	0.9784057502528954	NA	TRAF3IP3	ENST00000367024.5	517	1656	2331	2172
ENSG00000162757.4	2.467124086990901	-1.542151824469274	1.1408474854396133	-1.3517598488416902	0.17645215237862372	NA	C1orf74	ENST00000294811.2	258	810	4684	1067
ENSG00000117595.11	0.1877681767579691	-1.8147221247558167	3.8342613253018007	-0.47329119504210554	0.6360054430717719	NA	IRF6	ENST00000367021.7	174	1404	4306	1577
ENSG00000117597.17	16.08869246853598	0.004586262455592713	0.4572401857647618	0.010030313604045786	0.9919971018270635	0.998665554108594	UTP25	ENST00000491415.6	58	2271	8446	2328
ENSG00000143469.18	9.615793607790692	0.3162943241801224	0.5922183316670356	0.5340839809699666	0.5932834321640184	0.998665554108594	SYT14	ENST00000629778.3	1	1860	1860	1860
ENSG00000082497.11	20.376925502117917	-0.5226412735610584	0.4157010368000667	-1.2572527544895806	0.2086621259807762	0.9361498510374165	SERTAD4	ENST00000367012.3	231	1071	5219	1301
ENSG00000054392.12	0.7648191636931608	-1.473454905266492	2.059532803536185	-0.7154316273751957	0.47434237527086476	NA	HHAT	ENST00000545154.5	106	1485	3507	1590
ENSG00000143473.12	3.5951379349751598	-0.4456174694977069	0.9092492470047115	-0.49009385596488464	0.6240674855592021	NA	KCNH1	ENST00000271751.9	236	2970	8172	3205
ENSG00000284299.1	0.11472017899506465	0.10883371621799334	4.080472856796901	0.026671839278800125	0.9787214741389535	NA	NA	NA	NA	NA	NA	NA
ENSG00000283952.1	0	NA	NA	NA	NA	NA	NA	NA	NA	NA	NA	NA
ENSG00000117625.13	46.998504859384084	-0.1527855362214106	0.2675383339794347	-0.5710790448188819	0.5679460625897104	0.998665554108594	RCOR3	ENST00000419091.6	129	1662	2041	1790
ENSG00000082512.14	4.968533890938314	-0.12950552907086316	0.7688526258442615	-0.16843999060113213	0.8662371495652493	NA	TRAF5	ENST00000261464.9	55	1674	3972	1728
ENSG00000198570.5	0.19849710308500057	-1.814722921847541	3.7520098932356833	-0.48366688081479126	0.628622301344521	NA	RD3	ENST00000367002.4	1165	588	4266	1752
ENSG00000170385.9	8.108322641176692	0.05548804016881753	0.6181742323987732	0.0897611664489813	0.9284770082568541	0.998665554108594	SLC30A1	ENST00000367001.4	131	1524	5474	1654
ENSG00000117650.12	0.11472017899506465	0.10883371621799334	4.080472856796901	0.026671839278800125	0.9787214741389535	NA	NEK2	ENST00000366999.8	140	1338	2131	1477
ENSG00000123684.12	12.890806237888857	0.7179802079744992	0.5039501671453217	1.4247047719848434	0.1542425591301043	0.9003158754904957	LPGAT1	ENST00000366997.8	228	1113	7782	1340
ENSG00000143493.12	20.6713380443196	0.109772141082145	0.3908721173258868	0.2808390166920586	0.7788338764043987	0.998665554108594	INTS7	ENST00000366994.7	106	2889	4417	2994
ENSG00000143476.17	0.3055058860872866	1.3791407427759181	2.9037968746661345	0.4749439448771655	0.6348269279301986	NA	DTL	ENST00000366991.4	315	2193	4573	2507
ENSG00000066027.11	0.29388995663111156	-0.852941290235095	3.042030946726463	-0.2803854744321215	0.779181780019977	NA	PPP2R5A	ENST00000261461.6	575	1461	3128	2035
ENSG00000065600.12	10.512000917023384	0.39353031648286013	0.5631870706667483	0.6987559498071676	0.48470456176010573	0.998665554108594	TMEM206	ENST00000535273.2	145	1236	2119	1380
ENSG00000117691.9	0.8511365422226788	1.512464618532928	1.916169782791143	0.7893166002909369	0.42992698664860324	NA	NENF	ENST00000366988.4	58	519	949	576
ENSG00000162772.16	4.357662903106559	0.06318140104881166	0.8177998545247303	0.07725777976022012	0.93841847734681	NA	ATF3	ENST00000341491.8	266	546	2033	811
ENSG00000162771.7	0	NA	NA	NA	NA	NA	FAM71A	ENST00000294829.4	405	1785	2305	2189
ENSG00000123685.8	0.476823483387737	-2.772262526579714	2.556060008239706	-1.0845842889615496	0.2781058165762987	NA	BATF3	ENST00000243440.1	224	384	980	607
ENSG00000117697.14	18.516912286621153	0.21419434548293761	0.43445642433564446	0.49301686771113146	0.6220006689673871	0.998665554108594	NSL1	ENST00000366977.7	20	846	2317	865
ENSG00000203705.10	10.17201640365486	0.3518373920565033	0.5649468936003696	0.6227795852000647	0.5334293755048589	0.998665554108594	TATDN3	ENST00000532324.5	95	846	1381	940
ENSG00000185523.6	0.28905530662976786	-1.8147273456729796	3.257988198284016	-0.5570085694689739	0.5775215742398907	NA	SPATA45	ENST00000332912.3	109	297	506	405
ENSG00000162769.12	18.194133266411335	0.05089327331565501	0.4333379046472917	0.11744477639702153	0.9065076031279717	0.998665554108594	FLVCR1	ENST00000366971.8	199	1668	5939	1866
ENSG00000143494.15	55.774910478357825	0.05248115940196696	0.24342477825374031	0.21559497672526098	0.8293034717172499	0.998665554108594	VASH2	ENST00000517399.2	1	1068	1068	1068
ENSG00000174606.13	11.908880894272063	0.43223526951943014	0.519545913515034	0.8319481652643634	0.4054382032583549	0.998665554108594	ANGEL2	ENST00000366962.7	156	1635	4649	1790
ENSG00000136643.11	19.635026936443495	0.5133073827874677	0.4002750438851087	1.282386675435111	0.1997070360468369	0.9291811678490309	RPS6KC1	ENST00000366960.7	151	3201	5490	3351
ENSG00000117707.15	10.118885643860741	-0.5548708145173102	0.5506982029691099	-1.00757694781952	0.31365760019588024	0.9896696262630528	PROX1	ENST00000366958.8	609	2214	8240	2822
ENSG00000143499.13	21.86463906320275	0.18628360617424733	0.3851108050437663	0.4837143069851726	0.6285886381683046	0.998665554108594	SMYD2	ENST00000366957.9	23	1302	1671	1324
ENSG00000152104.11	0.09539285354611099	0.10883371621799316	4.080472856796901	0.02667183927880008	0.9787214741389535	NA	PTPN14	ENST00000366956.9	196	3564	12985	3759
ENSG00000117724.12	1.369632206842576	1.0317080914439316	1.5601137652814083	0.661303114172469	0.5084179447440773	NA	CENPF	ENST00000366955.7	169	9345	10307	9513
ENSG00000082482.13	0.28179695128026566	1.1586086705226502	3.0338809567996927	0.3818899577868788	0.7025429893180182	NA	KCNK2	ENST00000444842.6	151	1281	3379	1431
ENSG00000136636.12	30.799340924750965	0.28635077459366354	0.3293969614161034	0.8693182030660486	0.3846731091354183	0.998665554108594	KCTD3	ENST00000259154.8	295	2448	3931	2742
ENSG00000042781.12	0.5126013882942094	0.5069941385671115	2.346954922220317	0.216022103265398	0.8289705183994416	NA	USH2A	ENST00000307340.7	388	15609	18883	15996
ENSG00000196482.16	18.69969707833233	-0.8349820738532094	0.42010105108696083	-1.9875743507253647	0.04685878537848337	0.6268792985157392	ESRRG	ENST00000366937.5	268	1413	5365	1680
ENSG00000092978.10	22.92835520710087	-0.01772045208698309	0.3790050369844331	-0.046755188870249556	0.9627083440474512	0.998665554108594	GPATCH2	ENST00000366935.7	112	1587	5851	1698
ENSG00000162814.10	2.095945307581635	0.29067765789606387	1.2101740135955261	0.2401949262093612	0.8101791468650792	NA	SPATA17	ENST00000366933.4	56	1086	5818	1141
ENSG00000067533.5	21.311596221781162	0.2776392212928811	0.394300956616436	0.7041302249818281	0.48135167884544994	0.998665554108594	RRP15	ENST00000366932.3	31	849	7771	879
ENSG00000092969.11	0.5456306561353921	0.5842180195521105	2.3070951897298952	0.25322666448821657	0.8000930625640431	NA	TGFB2	ENST00000366929.4	468	1329	5053	1796
ENSG00000143353.11	9.586766709687927	-0.8855402445263135	0.5652386650700236	-1.5666660815155133	0.11719276292709087	0.8339028797662309	LYPLAL1	ENST00000366928.9	48	714	1898	761
ENSG00000196660.10	9.127955823533863	0.4277543690556683	0.5986556237941167	0.714524932288579	0.4749026447473303	0.998665554108594	SLC30A10	ENST00000366926.3	163	1458	1915	1620
ENSG00000136628.17	149.2316744634128	-0.33965652599123636	0.17888374645602062	-1.8987556595855535	0.05759660959930012	0.6880501864682924	EPRS	ENST00000366923.7	271	4539	5014	4809
ENSG00000162813.17	19.20898806959527	0.7871713695679591	0.41777890995519545	1.8841816827287403	0.05954040435781352	0.6923513569627399	BPNT1	ENST00000469520.6	451	927	2737	1377
ENSG00000067704.9	20.63714659789408	-0.12861365897015506	0.4171876535287756	-0.30828730879803923	0.7578637221951289	0.998665554108594	IARS2	ENST00000366922.2	116	3039	3560	3154
ENSG00000118873.15	61.947094704709464	0.030288010053600503	0.23213119782156852	0.13047798114961645	0.8961882737057016	0.998665554108594	RAB3GAP2	ENST00000358951.6	118	4182	7257	4299
ENSG00000116141.15	46.47933454156531	0.0754240954323867	0.26207346842333484	0.2877975244352167	0.7735017324504614	0.998665554108594	MARK1	ENST00000611084.4	641	2391	5321	3031
ENSG00000162817.6	0.262469625831312	1.0699329647788878	3.110838632493142	0.3439371472384614	0.7308935546966044	NA	C1orf115	ENST00000294889.5	559	429	3413	987
ENSG00000117791.15	0.9717509975434312	1.5462053096188635	1.8387715401771416	0.8408903856919098	0.4004093449967015	NA	MARC2	ENST00000366913.7	199	1008	2134	1206
ENSG00000186205.12	7.852981860908486	-0.3767947696286145	0.621786237252882	-0.6059876321697535	0.5445229660086388	0.998665554108594	MARC1	ENST00000366910.9	187	1014	7439	1200
ENSG00000136630.12	0	NA	NA	NA	NA	NA	HLX	ENST00000366903.7	459	1467	2280	1925
ENSG00000143507.17	41.461225710463914	-0.7234380414537195	0.29853961687282665	-2.4232564141123456	0.015382065149830598	0.3378710687501252	DUSP10	ENST00000366899.3	240	1449	2676	1688
ENSG00000143512.12	0.2294403579901293	0.9544283611678432	3.5363014242657567	0.2698945159534899	0.7872414063075179	NA	HHIPL2	ENST00000343410.6	60	2175	2575	2234
ENSG00000143498.17	9.447300965400764	0.4168577477669666	0.5815558052025004	0.7167975008379718	0.4734990540102601	0.998665554108594	TAF1A	ENST00000350027.8	210	1353	1966	1562
ENSG00000154305.16	37.15903115750746	0.025834007134574496	0.2977883270713774	0.08675292073615194	0.9308679102782578	0.998665554108594	MIA3	ENST00000344922.9	26	5724	8142	5749
ENSG00000186063.12	1.003579854717452	-0.6319753730341415	1.7722062614453196	-0.3566037355712394	0.7213884805360178	NA	AIDA	ENST00000340020.10	208	921	3008	1128
ENSG00000162819.11	22.776632677280777	-0.07827887967266314	0.3702084253175036	-0.21144542997779822	0.8325397100108259	0.998665554108594	BROX	ENST00000340934.9	407	1236	4124	1642
ENSG00000197520.10	0	NA	NA	NA	NA	NA	FAM177B	ENST00000445590.3	18	477	1096	494
ENSG00000154309.8	2.6317771539279433	-0.39502676239101153	1.0636649222733103	-0.37138271096384695	0.7103525009310482	NA	DISP1	ENST00000284476.7	165	4575	4762	4739
ENSG00000187554.12	0.16707677228520101	0.10883426093833813	4.0208191991403215	0.027067683362039168	0.9784057502528954	NA	TLR5	ENST00000642603.1	642	2577	4267	3218
ENSG00000143502.14	10.889349268768036	-0.6900845844090135	0.5296392298221159	-1.3029332903470627	0.19259753733576956	0.9291811678490309	SUSD4	ENST00000343846.7	635	1473	3480	2107
ENSG00000178395.6	0	NA	NA	NA	NA	NA	CCDC185	ENST00000366875.4	60	1872	2054	1931
ENSG00000203697.11	0.5915436623828016	-1.7993912845207756	2.3164121813071925	-0.7768009938133493	0.4372761903444009	NA	CAPN8	ENST00000366872.9	89	2112	2427	2200
ENSG00000162909.17	36.5888879937486	-0.47463377740810053	0.3012234739014718	-1.575686553443541	0.11509805784961952	0.8291167243435493	CAPN2	ENST00000295006.5	310	2103	3573	2412
ENSG00000143514.16	27.46842774432521	-0.23520152184170515	0.3392489447547453	-0.6933006733793686	0.48812088055299546	0.998665554108594	TP53BP2	ENST00000343537.11	293	3405	4651	3697
ENSG00000143756.11	21.0418237616075	0.22967043585359068	0.38306084649333266	0.5995664604098038	0.5487952051889682	0.998665554108594	FBXO28	ENST00000366862.9	44	1107	5451	1150
ENSG00000143753.12	20.972236349300523	-0.3596609486370077	0.3872592626747125	-0.9287342700414977	0.3530268159072925	0.9954514406987122	DEGS1	ENST00000323699.8	167	972	2101	1138
ENSG00000143748.17	19.20562255918566	0.23649387450645437	0.4332449676647417	0.5458664085152413	0.5851577703858974	0.998665554108594	NVL	ENST00000281701.10	261	2571	3123	2831
ENSG00000143771.11	10.633918455825798	0.09265153596831163	0.5308277123477771	0.1745416334021575	0.8614398141642192	0.998665554108594	CNIH4	ENST00000465271.5	76	420	4125	495
ENSG00000162923.15	63.98426980167701	0.09133704872857065	0.23745852793302344	0.38464421355434664	0.7005010320040623	0.998665554108594	WDR26	ENST00000414423.7	690	1986	7367	2675
ENSG00000143786.7	0.1877681767579691	-1.8147221247558167	3.8342613253018007	-0.47329119504210554	0.6360054430717719	NA	CNIH3	ENST00000272133.3	883	483	2558	1365
ENSG00000185842.15	9.534307158684394	-0.44154702282153796	0.5700958646198327	-0.7745136392385212	0.43862710564948376	0.998665554108594	DNAH14	ENST00000400952.7	203	1362	1984	1564
ENSG00000143815.14	31.92936883574781	0.1750014943332733	0.31497392000518326	0.5556063001355587	0.5784800236353052	0.998665554108594	LBR	ENST00000338179.6	165	1848	3812	2012
ENSG00000154380.17	247.47780120812791	-0.2609936946404467	0.1511196774355499	-1.7270662502026335	0.08415576601300763	0.7627336209771157	ENAH	ENST00000366844.7	453	1776	13168	2228
ENSG00000143742.12	6.058571908528102	0.6758789423419321	0.7173409600473858	0.9422004039714743	0.3460900471429831	NA	SRP9	ENST00000304786.11	113	261	1480	373
ENSG00000143819.12	21.261573666126758	0.30064918470285706	0.40702005904134503	0.7386593805990215	0.4601138568383624	0.998665554108594	EPHX1	ENST00000614058.4	210	1368	1789	1577
ENSG00000196187.11	0.8274276074156578	1.3949157379521517	1.9271284683838348	0.72383121355785	0.4691693639470848	NA	TMEM63A	ENST00000366835.7	272	2424	4098	2695
ENSG00000243709.1	0.28179695128026566	1.1586086705226502	3.0338809567996927	0.3818899577868788	0.7025429893180182	NA	LEFTY1	ENST00000272134.5	81	1101	1626	1181
ENSG00000255835.1	0	NA	NA	NA	NA	NA	NA	NA	NA	NA	NA	NA
ENSG00000143811.18	11.222316229325509	0.0772304930414835	0.5254535851104716	0.14697871558959202	0.8831488203494106	0.998665554108594	PYCR2	ENST00000343818.10	150	963	1689	1112
ENSG00000143768.12	0	NA	NA	NA	NA	NA	LEFTY2	ENST00000366820.9	350	1101	2287	1450
ENSG00000143751.9	34.61592844368753	-0.2305800968017395	0.30058961788399996	-0.7670926841216528	0.4430264113356616	0.998665554108594	SDE2	ENST00000272091.7	20	1356	3975	1375
ENSG00000163041.9	0.6662451114561445	0.6375077283606507	2.103084777446411	0.3031298287150933	0.7617909228963031	NA	H3F3A	ENST00000366813.1	376	411	1308	786
ENSG00000182827.8	59.75160052219567	-0.07168471022989488	0.23894559677322685	-0.30000431561803503	0.7641738637759562	0.998665554108594	ACBD3	ENST00000366812.5	56	1587	3573	1642
ENSG00000185155.11	0.5009854588380344	-1.6440770156613984	2.4231897001652727	-0.6784763964411308	0.49746968461947705	NA	MIXL1	ENST00000542034.5	65	723	839	787
ENSG00000183814.15	3.237998790370228	0.512311522217164	0.9811203054451035	0.5221699310205841	0.6015520198054928	NA	LIN9	ENST00000328205.9	547	1677	3567	2223
ENSG00000143799.12	117.84136626307426	0.0204151633296003	0.1811505146758066	0.11269724166191855	0.9102705881537945	0.998665554108594	PARP1	ENST00000366794.9	145	3045	3958	3189
ENSG00000203685.9	2.5649292860504485	1.5695100424108894	1.2152109264922706	1.2915535963302354	0.19651178285949827	NA	STUM	ENST00000366788.7	106	426	7705	531
ENSG00000143772.9	0.09539285354611099	0.10883371621799316	4.080472856796901	0.02667183927880008	0.9787214741389535	NA	ITPKB	ENST00000429204.5	341	2841	6162	3181
ENSG00000143801.16	17.444871361584113	-0.06261681307844759	0.4347171949160478	-0.1440403411936353	0.8854686141105801	0.998665554108594	PSEN2	ENST00000366783.7	437	1347	2306	1783
ENSG00000163050.16	20.298241842148713	0.1513466510534952	0.400461383714545	0.37793069995826967	0.7054820756163378	0.998665554108594	COQ8A	ENST00000366779.5	2772	1944	5523	4715
ENSG00000143776.18	41.67903400193014	-0.17387543708362171	0.286664433773583	-0.606546946877108	0.5441516175277141	0.998665554108594	CDC42BPA	ENST00000366769.7	1293	5160	10855	6452
ENSG00000181450.17	3.4631766930898875	-0.5799303640700966	0.9742337039221639	-0.5952682213059937	0.5516641945846446	NA	NA	NA	NA	NA	NA	NA
ENSG00000143740.14	16.5465667424006	0.21842179897585753	0.4464146978806055	0.4892800349379959	0.62464345375713215	0.998665554108594	SNAP47	ENST00000315781.9	415	1395	2367	1809
ENSG00000081692.12	8.08464673173582	-0.23704581080354759	0.6403046678534141	-0.3702078443348391	0.7112276322393196	0.998665554108594	JMJD4	ENST00000366758.7	1	1392	2595	1392
ENSG00000185888.5	0	NA	NA	NA	NA	NA	PRSS38	ENST00000366757.3	25	981	1267	1005
ENSG00000143816.7	0.1877681767579691	-1.8147221247558167	3.8342613253018007	-0.47329119504210554	0.6360054430717719	NA	WNT9A	ENST00000272164.5	12	1098	3971	1109
ENSG00000154342.5	0	NA	NA	NA	NA	NA	WNT3A	ENST00000284523.1	79	1059	2932	1137
ENSG00000143761.15	288.97016738636927	0.24386145681087892	0.13042982821367774	1.8696755194016732	0.06152889105643368	0.7000596862660998	ARF1	ENST00000541182.1	263	546	2006	808
ENSG00000143793.12	21.278952716854874	-0.007813800713775581	0.3923952073720477	-0.019913089066775892	0.9841127036505579	0.998665554108594	C1orf35	ENST00000272139.4	236	792	1427	1027
ENSG00000162910.18	25.803189638350084	0.10705549154152769	0.38162658006834016	0.2805242012292661	0.7790753606403747	0.998665554108594	MRPL55	ENST00000430433.5	290	495	864	784
ENSG00000143774.16	24.429189024355246	0.25801085839242105	0.36164928790039175	0.7134283600842715	0.47558072911252147	0.998665554108594	GUK1	ENST00000366728.6	14	726	842	739
ENSG00000198835.3	0.9928954426594756	0.5336942554476098	1.7429029059133576	0.30620997511501113	0.7594447779272206	NA	GJC2	ENST00000366714.2	176	1320	2243	1495
ENSG00000181873.12	7.560505454664229	-0.5817973949948586	0.6429991165902925	-0.9048183426441151	0.3655616325356362	0.998665554108594	IBA57	ENST00000366711.3	3	1071	7817	1073
ENSG00000154358.20	16.631206522542854	-0.6564138973986314	0.4582027079353636	-1.4325840638445735	0.15197673864558273	0.8961943397440332	OBSCN	ENST00000570156.6	75	26772	26925	26846
ENSG00000154370.15	24.48856267121105	-0.1419499089322126	0.35860334150930445	-0.39584101011097106	0.6922223209472713	0.998665554108594	TRIM11	ENST00000284551.10	280	1407	2715	1686
ENSG00000162931.11	3.013044115412917	0.14175794067638844	1.0282898911894787	0.13785795415377403	0.8903526807695792	NA	TRIM17	ENST00000366697.6	958	1434	2652	2391
ENSG00000168148.3	0	NA	NA	NA	NA	NA	HIST3H3	ENST00000366696.1	1	411	481	411
ENSG00000181218.5	13.006983080679579	0.3363316943236028	0.5000105658733002	0.6726491743953014	0.5011705094926739	0.998665554108594	HIST3H2A	ENST00000366695.3	57	393	895	449
ENSG00000196890.4	25.99550565443088	-0.06460087356395872	0.35363431926628974	-0.182677048138288	0.855051425633995	0.998665554108594	HIST3H2BB	ENST00000620438.1	24	381	2364	404
ENSG00000168159.11	151.55857100588466	-0.10960152193880175	0.16334560585819557	-0.6709793101747077	0.5022337100085521	0.998665554108594	RNF187	ENST00000305943.7	429	708	3017	1136
ENSG00000116574.5	23.346537471041103	-0.1351974450513372	0.36882374220909914	-0.3665638341001622	0.7139443892511508	0.998665554108594	RHOU	ENST00000366691.3	667	777	4372	1443
ENSG00000168118.11	21.223509958431734	0.488073132552526	0.38488463526690414	1.2681024073981655	0.20476138193744575	0.9304659922537318	RAB4A	ENST00000366690.4	209	657	2966	865
ENSG00000213029.3	0	NA	NA	NA	NA	NA	SPHAR	ENST00000366688.4	279	192	648	470
ENSG00000154429.10	19.776272041803875	-0.7917976650486236	0.4191986495989569	-1.8888363924982305	0.05891375470150825	0.6908590075636436	CCSAP	ENST00000284617.6	79	813	5121	891
ENSG00000143632.14	7.180542977521169	-0.6420221684068106	0.6511784510567231	-0.9859389040975576	0.324163094509093	0.9896696262630528	ACTA1	ENST00000366684.7	104	1134	1491	1237
ENSG00000069248.11	46.679075409835285	-0.43451498363432006	0.2647648267179882	-1.641135603322188	0.1007692696030131	0.7957266498892703	NUP133	ENST00000261396.5	93	3471	5207	3563
ENSG00000135776.4	6.823795913293566	-0.5230407121210988	0.6699544778925612	-0.7807108234672885	0.43497259333055527	0.998665554108594	ABCB10	ENST00000344517.4	44	2217	3857	2260
ENSG00000135801.9	13.495280557943113	-0.12024379070262611	0.4763694839766519	-0.25241707277059666	0.8007187051389478	0.998665554108594	TAF5L	ENST00000258281.6	167	1770	3112	1936
ENSG00000135763.9	19.750961205658314	0.2134196266634993	0.39739207152647193	0.5370505401471819	0.5912327038697207	0.998665554108594	URB2	ENST00000258243.6	137	4575	5613	4711
ENSG00000143641.9	19.65516211017965	0.30858560836259485	0.41802986834284395	0.7381903345468864	0.46039879550828505	0.998665554108594	GALNT2	ENST00000366672.4	73	1716	4454	1788
ENSG00000177614.10	38.71268738025097	-0.41129991098629665	0.29861240640457803	-1.3773704714366182	0.1683977374667627	0.9167630824451314	PGBD5	ENST00000391860.6	444	1575	10961	2018
ENSG00000135775.13	14.609003787531172	0.20631884364975098	0.47085167739749834	0.43818224199629274	0.6612541803940817	0.998665554108594	COG2	ENST00000366669.8	116	2217	2921	2332
ENSG00000135744.7	0.3132172820800652	-0.8529414095629032	2.9792353811423258	-0.2862954081982809	0.7746518747375544	NA	AGT	ENST00000366667.4	216	1458	2291	1673
ENSG00000135773.12	0.3755363535159382	-2.565469269151976	2.9484801556472364	-0.8700988759372594	0.3842463719330909	NA	CAPN9	ENST00000271971.6	114	2073	2362	2186
ENSG00000119280.16	44.00979467338174	-0.10040643171638312	0.27020146913981563	-0.3715983929918155	0.7101918857601488	0.998665554108594	C1orf198	ENST00000366663.9	142	984	3858	1125
ENSG00000143643.12	19.334157761605212	-0.05932097071884184	0.3950009195789031	-0.1501793230812776	0.8806231386647957	0.998665554108594	TTC13	ENST00000366661.8	9	2583	3253	2591
ENSG00000173409.13	8.718271101725003	-0.28317724602695554	0.5922816583836241	-0.4781124689894416	0.6325701577715008	0.998665554108594	ARV1	ENST00000310256.6	58	816	1335	873
ENSG00000182118.7	0	NA	NA	NA	NA	NA	FAM89A	ENST00000366654.4	36	555	1495	590
ENSG00000119283.15	42.493636962287304	-1.0814253522722903	0.2846705513325638	-3.798866258592814	1.4535950038178214e-4	0.012664556523016627	TRIM67	ENST00000366653.5	1	2352	3936	2352
ENSG00000143633.12	12.867093617779917	0.2603886964353612	0.4878099988513283	0.5337912241415963	0.5934859861179478	0.998665554108594	C1orf131	ENST00000366649.6	27	882	1424	908
ENSG00000116906.12	20.484985787668453	-0.4042996975060152	0.3967538291322351	-1.0190190183930528	0.3081939376770936	0.9896696262630528	GNPAT	ENST00000366647.8	170	2043	2643	2212
ENSG00000116903.7	34.238369540593816	-0.5024489502792052	0.30702772011599466	-1.6364937670428608	0.10173628913264178	0.7960116523064636	EXOC8	ENST00000366645.1	108	2178	5100	2285
ENSG00000010072.15	10.046793078192923	0.6219603403604961	0.565845013526553	1.0991708427086984	0.27169355409460993	0.9658760405001956	SPRTN	ENST00000295050.11	337	1470	3468	1806
ENSG00000135766.8	17.076352288798187	-0.14192171803988557	0.43378003790740477	-0.327174387103033	0.7435359919232949	0.998665554108594	EGLN1	ENST00000366641.3	3157	1281	7097	4437
ENSG00000116918.13	21.228243154100987	0.1712549874191959	0.4024093399326091	0.4255740869431006	0.6704182257669542	0.998665554108594	TSNAX	ENST00000366639.8	159	873	2650	1031
ENSG00000270106.6	0	NA	NA	NA	NA	NA	NA	NA	NA	NA	NA	NA
ENSG00000162946.22	1.809313706300026	-0.37346360003047663	1.3418815151672916	-0.27831339489307827	0.7807717945273519	NA	DISC1	ENST00000366633.7	54	2268	2676	2321
ENSG00000116991.10	84.57394142455301	0.2009017867854882	0.20747636517867854	0.9683116754646809	0.3328887355203801	0.9935034008180731	SIPA1L2	ENST00000366630.5	360	5169	6690	5528
ENSG00000212916.4	14.203535293420831	-0.1338642662830253	0.4622837466804046	-0.289571647812163	0.772143959853427	0.998665554108594	MAP10	ENST00000418460.2	133	3144	3516	3276
ENSG00000135778.11	16.661762846052774	-0.09563696791011912	0.43398552744097874	-0.22036902583836873	0.8255837662790293	0.998665554108594	NTPCR	ENST00000366628.9	88	573	6311	660
ENSG00000135749.18	19.52573763743204	0.17772310983310588	0.39893469242713037	0.4454942455664441	0.6559626174219162	0.998665554108594	PCNX2	ENST00000258229.13	236	6414	7518	6649
ENSG00000143674.10	2.2825816231928924	-1.6067085910466572	1.1944481695851739	-1.3451471834099418	0.17857770858147923	NA	MAP3K21	ENST00000366624.7	262	3111	5809	3372
ENSG00000135750.14	0.3248332115362403	1.4517065836747587	2.8433479267708344	0.5105624148232359	0.6096574996289457	NA	KCNK1	ENST00000366621.7	169	1011	2161	1179
ENSG00000183780.12	0.5040029891722873	0.4449035352324484	2.358311212852463	0.18865344523139568	0.850364441601727	NA	SLC35F3	ENST00000366618.7	146	1473	2891	1618
ENSG00000168275.14	11.011100706673878	0.5017689533854713	0.5572834361353187	0.9003837560024529	0.3679160623382634	0.998665554108594	COA6	ENST00000366615.8	12	468	710	479
ENSG00000059588.9	9.635165447508701	0.43611420756079544	0.5874280157067888	0.7424130206593335	0.45783713298790246	0.998665554108594	TARBP1	ENST00000040877.1	1	4866	5130	4866
ENSG00000168264.10	57.79591817124654	-0.10667818647711642	0.24843357478436645	-0.4294032582742094	0.6676297830260973	0.998665554108594	IRF2BP2	ENST00000366609.3	32	1764	4663	1795
ENSG00000173726.10	35.7279002738647	-0.25368929119353795	0.309530225212469	-0.8195945679275732	0.4124472713520058	0.998665554108594	TOMM20	ENST00000366607.4	222	438	3387	659
ENSG00000188739.14	36.12059923177802	-0.1583282811807259	0.2953486454191497	-0.5360724812400317	0.5919084580640581	0.998665554108594	RBM34	ENST00000408888.7	232	1293	2054	1524
ENSG00000054267.21	63.63536376378309	-0.06782053118578675	0.23317288958756402	-0.2908594189733963	0.7711588390495372	0.998665554108594	ARID4B	ENST00000366603.6	378	3939	5946	4316
ENSG00000152904.11	4.899075618240536	-0.48722007162051206	0.7932271594489714	-0.6142251507865258	0.5390665556624633	NA	GGPS1	ENST00000282841.9	233	903	2895	1135
ENSG00000285053.1	0	NA	NA	NA	NA	NA	TBCE	ENST00000645655.1	852	1584	2624	2435
ENSG00000284770.1	0.3024883557530338	-0.852941344952721	3.013398577298713	-0.2830496275462237	0.7771387945328347	NA	TBCE	ENST00000543662.4	107	1737	1980	1843
ENSG00000162885.12	3.2616391756567995	1.0282299091439153	1.0081041346365545	1.0199639836956096	0.3077455422923526	NA	B3GALNT2	ENST00000366600.7	230	1503	2015	1732
ENSG00000168243.10	20.748719416593392	-0.24161347372637196	0.39989866890021625	-0.6041867415834284	0.5457194947180377	0.998665554108594	GNG4	ENST00000391854.6	455	228	5104	682
ENSG00000143669.13	37.110044453409444	-0.4033289687414497	0.2889835276124541	-1.3956815188523144	0.16281042202829543	0.9138857677834312	LYST	ENST00000389793.6	176	11406	13480	11581
ENSG00000116962.14	0.11472017899506465	0.10883371621799334	4.080472856796901	0.026671839278800125	0.9787214741389535	NA	NID1	ENST00000264187.6	84	3744	5864	3827
ENSG00000077585.13	1.1586321711722567	-0.4967752112484894	1.6073572830658562	-0.30906334047956385	0.7572733449431548	NA	GPR137B	ENST00000366592.7	92	1200	2042	1291
ENSG00000086619.13	0.9717509975434312	1.5462053096188635	1.8387715401771416	0.8408903856919098	0.4004093449967015	NA	ERO1B	ENST00000354619.9	203	1404	4567	1606
ENSG00000186197.14	1.078036445773226	-1.295620025297212	1.690700634753524	-0.766321369179643	0.4434851063718345	NA	EDARADD	ENST00000334232.8	168	648	858	815
ENSG00000116977.18	46.8266951145052	-0.5913585909986464	0.2671690256118407	-2.2134249643811925	0.026868361121739938	0.47589614824425497	LGALS8	ENST00000526589.5	521	1080	6420	1600
ENSG00000119285.10	30.658390702322855	0.346852739353286	0.33173970169018235	1.0455569158171425	0.2957656498399969	0.9828392948364816	HEATR1	ENST00000366582.7	116	6435	8447	6550
ENSG00000077522.12	2.6171896092668225	0.8833604428620918	1.1505069882218066	0.7678010232926881	0.44260540649305363	NA	ACTN2	ENST00000542672.5	221	2685	4906	2905
ENSG00000116984.12	20.83015379745234	0.2310158267490085	0.39113401012572024	0.5906308854981807	0.5547677659505326	0.998665554108594	MTR	ENST00000366577.9	395	3798	10529	4192
ENSG00000244020.2	0.09539285354611099	0.10883371621799316	4.080472856796901	0.02667183927880008	0.9787214741389535	NA	MT1HL1	ENST00000464121.2	47	186	316	232
ENSG00000198626.15	5.759253476909553	0.1592964008933539	0.7488345985670856	0.21272574904814986	0.8315408815699465	NA	RYR2	ENST00000366574.6	318	14904	16562	15221
ENSG00000116996.9	0.28179695128026566	1.1586086705226502	3.0338809567996927	0.3818899577868788	0.7025429893180182	NA	ZP4	ENST00000611898.4	288	1623	2474	1910
ENSG00000270188.1	0	NA	NA	NA	NA	NA	NA	NA	NA	NA	NA	NA
ENSG00000133019.11	1.0775593698785553	0.7766880861681622	1.7284990660162616	0.4493424968740221	0.6531846058950201	NA	CHRM3	ENST00000255380.8	780	1773	8780	2552
ENSG00000155816.19	35.59949255492624	0.5824324852555379	0.3063912392213722	1.9009436651506928	0.05730939188772906	0.6861017668287938	FMN2	ENST00000319653.13	231	5169	6434	5399
ENSG00000180875.4	4.125995498214866	-0.7918958686667894	0.8801233305557681	-0.899755569673098	0.36825034361032644	NA	GREM2	ENST00000318160.4	268	507	4170	774
ENSG00000182901.16	18.92909195319369	-0.09619982867340139	0.41570241106050554	-0.23141513283020024	0.8169923099059765	0.998665554108594	RGS7	ENST00000366565.5	383	1464	2494	1846
ENSG00000091483.6	45.08744054646312	-0.7259635705445148	0.29652106902661185	-2.44826977363744	0.014354413366607836	0.323546926760294	FH	ENST00000366560.3	40	1533	1797	1572
ENSG00000117009.11	0.11472017899506465	0.10883371621799334	4.080472856796901	0.026671839278800125	0.9787214741389535	NA	KMO	ENST00000366559.8	312	1461	5261	1772
ENSG00000054277.13	0.4008987396333976	1.7740196075970356	2.6276241674580625	0.675142065432137	0.4995855102196331	NA	OPN3	ENST00000366554.2	108	1209	2620	1316
ENSG00000203668.2	19.829931320854726	-0.2406830355921302	0.4003184387733441	-0.6012289524550286	0.5476875032106912	0.998665554108594	CHML	ENST00000366553.2	681	1971	7594	2651
ENSG00000162843.17	0.21011303254117564	0.8720993008102295	3.3658517487287454	0.25910211319901844	0.7955564543667359	NA	NA	NA	NA	NA	NA	NA
ENSG00000174371.16	0.09539285354611099	0.10883371621799316	4.080472856796901	0.02667183927880008	0.9787214741389535	NA	EXO1	ENST00000366548.7	594	2541	3473	3134
ENSG00000196289.7	0	NA	NA	NA	NA	NA	BECN2	ENST00000419583.2	1	1296	1296	1296
ENSG00000197769.5	0.19849710308500057	-1.814722921847541	3.7520098932356833	-0.48366688081479126	0.628622301344521	NA	MAP1LC3C	ENST00000357246.3	66	444	1182	509
ENSG00000180287.16	0.6990054860283641	1.0850539220005064	2.1403849282675016	0.5069433575570844	0.6121945624987679	NA	PLD5	ENST00000536534.6	243	1611	8721	1853
ENSG00000143702.15	84.59530860635533	0.02174571093250921	0.20990759895287064	0.1035965874555673	0.9174894959087996	0.998665554108594	CEP170	ENST00000366542.5	53	4755	6828	4807
ENSG00000054282.15	12.886710315515494	0.527327918201153	0.49834243229515535	1.0581637926606062	0.2899807751692745	0.9784400431703485	SDCCAG8	ENST00000366541.7	119	2142	2567	2260
ENSG00000117020.16	15.004620797749856	-0.8477544511178895	0.4582972725266149	-1.849791613299766	0.06434359010390944	0.7091782209996588	AKT3	ENST00000263826.9	113	1440	7081	1552
ENSG00000179456.10	8.705491436993526	-0.2013942439727763	0.5887243351622381	-0.3420858149464417	0.732286312232932	0.998665554108594	ZBTB18	ENST00000358704.4	150	1596	3851	1745
ENSG00000173728.10	0	NA	NA	NA	NA	NA	C1orf100	ENST00000308105.4	114	444	579	557
ENSG00000035687.9	33.39451019598463	0.011665789631588944	0.3240068344894951	0.03600476406607148	0.9712785602434261	0.998665554108594	ADSS	ENST00000366535.3	318	1371	2780	1688
ENSG00000179397.17	0.09539285354611099	0.10883371621799316	4.080472856796901	0.02667183927880008	0.9787214741389535	NA	CATSPERE	ENST00000366534.8	55	2856	3333	2910
ENSG00000121644.18	8.46160180186349	-0.5095420532694027	0.6767855224619598	-0.7528855691472666	0.4515186806068071	0.998665554108594	DESI2	ENST00000302550.15	380	585	4208	964
ENSG00000284188.2	0.11472017899506465	0.10883371621799334	4.080472856796901	0.026671839278800125	0.9787214741389535	NA	NA	NA	NA	NA	NA	NA
ENSG00000203667.9	17.877111219440817	0.05683285663914288	0.4920947302075069	0.11549169936279861	0.9080553994019029	0.998665554108594	COX20	ENST00000366528.3	100	393	568	492
ENSG00000153187.19	539.5134314636749	-0.20783903191710715	0.12727402939264024	-1.6330042578908535	0.10246810116176408	0.7965823614011197	HNRNPU	ENST00000640218.1	231	2478	6858	2708
ENSG00000203666.12	11.47406613329103	0.3333617792789472	0.5225677536947538	0.6379302529135256	0.5235190833778431	0.998665554108594	EFCAB2	ENST00000366523.5	266	489	1233	754
ENSG00000162849.15	72.1618033461433	-0.7790423142352526	0.2281797469503747	-3.414160654690713	6.397883790810075e-4	0.04045290522589342	KIF26B	ENST00000407071.6	441	6327	7287	6767
ENSG00000185420.18	25.564109017489148	-0.4784963186853131	0.3619627060485696	-1.3219492248494422	0.18618505926161444	0.92529621086065	SMYD3	ENST00000490107.5	41	1287	1548	1327
ENSG00000162851.7	10.00626059698467	0.5406335370895993	0.5552225253413856	0.973724069925268	0.3301935627312176	0.9930343427594474	TFB2M	ENST00000366514.4	187	1191	1848	1377
ENSG00000162852.13	50.72455417545014	0.4806268798035666	0.26847105483698164	1.790237238406979	0.07341578099649883	0.7340696708339086	CNST	ENST00000366513.8	270	2178	5126	2447
ENSG00000143653.9	45.221241350303096	0.08406514272300308	0.2656175440912034	0.3164894209478052	0.7516310536880775	0.998665554108594	SCCPDH	ENST00000366510.3	377	1290	2503	1666
ENSG00000153207.15	14.76660379996121	0.4036121523438089	0.4581567049458754	0.8809478241543794	0.37834606087657746	0.998665554108594	AHCTF1	ENST00000326225.3	98	6828	8633	6925
ENSG00000197472.14	0.3655738753702016	-0.8529416629417818	2.841297460916889	-0.3001944269033123	0.7640288558442491	NA	ZNF695	ENST00000339986.7	149	1548	3340	1696
ENSG00000135747.11	0	NA	NA	NA	NA	NA	NA	NA	NA	NA	NA	NA
ENSG00000277462.1	6.530010030337205	-0.633319608363571	0.6714355925894798	-0.9432321064796261	0.3455621944201988	0.9948679731403302	ZNF670	ENST00000366503.2	160	1170	1994	1329
ENSG00000188295.14	13.596851973939366	-0.6420307111836614	0.4737306264766295	-1.355265366646787	0.17533302514421337	0.9196103367818435	ZNF669	ENST00000343381.10	174	1395	1951	1568
ENSG00000196418.12	10.007624676008485	0.4307459448434109	0.5531913478675927	0.7786563302261023	0.43618218707878587	0.998665554108594	ZNF124	ENST00000543802.2	91	1056	1292	1146
ENSG00000197617.7	0.09539285354611099	0.10883371621799316	4.080472856796901	0.02667183927880008	0.9787214741389535	NA	NA	NA	NA	NA	NA	NA
ENSG00000162714.12	36.97601870828883	0.10143074490323686	0.29047845258189897	0.34918509101682493	0.7269503582643794	0.998665554108594	ZNF496	ENST00000294753.8	466	1764	5336	2229
ENSG00000162711.17	0	NA	NA	NA	NA	NA	NLRP3	ENST00000336119.7	747	3111	4170	3857
ENSG00000177535.8	0	NA	NA	NA	NA	NA	OR2B11	ENST00000641149.1	3550	954	6414	4503
ENSG00000169224.12	0	NA	NA	NA	NA	NA	GCSAML	ENST00000536561.5	348	408	4063	755
[truncated: 18,390 more rows]
